# Supplementary material for: Post-feeding transcriptomics reveals essential genes expressed in the midgut of the desert locust
Source: Front Physiol. 2023 Aug 10;14:1232545. doi: 10.3389/fphys.2023.1232545 (PMC10484617; doi:10.3389/fphys.2023.1232545)
Supplement: Supplementary file 2 [file Table3.xlsx]

## Sheet: Upregulated_2h_Annot
Transcript_id	LogFC	LogCPM	F-value	P-value	FDR	sprot_Top_BLASTX_hit	prot_id	prot_coords	sprot_Top_BLASTP_hit	Pfam	SignalP	TmHMM	eggnog	Kegg	gene_ontology_blast	gene_ontology_pfam	transcript	peptide
TR51342|c0_g1	4.83912	3.5118	26.9911	0.000174973	0.00694482	CHIT_BRUMA^CHIT_BRUMA^Q:120-254,H:451-494^42.22%ID^E:1e-05^RecName: Full=Endochitinase;^Eukaryota; Metazoa; Ecdysozoa; Nematoda; Chromadorea; Rhabditida; Spirurina; Spiruromorpha; Filarioidea; Onchocercidae; Brugia	0	0	0	0	0	0	0	0	GO:0005576^cellular_component^extracellular region`GO:0008061^molecular_function^chitin binding`GO:0004568^molecular_function^chitinase activity`GO:0006032^biological_process^chitin catabolic process`GO:0000272^biological_process^polysaccharide catabolic process	0	GAAAACGTTTGGAGAGCAACATGAAAGGACTGTCGCTTGTTGTGTGTGGCGTTTTGGTGGCTGTGATCGGAAGCAGCAGTGCCGCTTCCATTCGCAAAGTGACTGTGATGAGTGCAACATGCCAGGGAGCGTCCGGTCCATTTCCGAACCCCAGCAGCTGCAGGAGCTTCCTACAGTGTGAGCCATCAGGTGTTGCAACGGTCATCCCATGTCCAGCAAACCTCGAGTTCAATCCAAAGCTGAGGGTCTGCGACTTCCCAGAGCGAGCTGG	0
TR107741|c0_g2	4.33089	3.38896	18.3637	0.000895747	0.00965061	L2EFL_DROME^L2EFL_DROME^Q:250-741,H:1-170^52.02%ID^E:1e-45^RecName: Full=Protein lethal(2)essential for life;^Eukaryota; Metazoa; Ecdysozoa; Arthropoda; Hexapoda; Insecta; Pterygota; Neoptera; Holometabola; Diptera; Brachycera; Muscomorpha; Ephydroidea; Drosophilidae; Drosophila; Sophophora	TR107741|c0_g2|m.1567	250-819[+]	L2EFL_DROME^L2EFL_DROME^Q:1-165,H:1-171^51.72%ID^E:9e-48^RecName: Full=Protein lethal(2)essential for life;^Eukaryota; Metazoa; Ecdysozoa; Arthropoda; Hexapoda; Insecta; Pterygota; Neoptera; Holometabola; Diptera; Brachycera; Muscomorpha; Ephydroidea; Drosophilidae; Drosophila; Sophophora	PF00011.21^HSP20^Hsp20/alpha crystallin family^65-161^E:2.6e-28	0	0	ENOG410YERS^Heat shock protein	KEGG:dme:Dmel_CG4533`KO:K09542	GO:0048471^cellular_component^perinuclear region of cytoplasm`GO:0030018^cellular_component^Z disc`GO:0051082^molecular_function^unfolded protein binding`GO:0061077^biological_process^chaperone-mediated protein folding`GO:0007275^biological_process^multicellular organism development`GO:0042026^biological_process^protein refolding`GO:0010998^biological_process^regulation of translational initiatio…	0	CAATACTCTGTATACATTGGTTTGAAATTCTGTGCTAGAAACATTCGCTACATGTTGATTATCGATTAGTGCCAGGAGAGTCACGAAAGTTCTCGACGCGGGAAGTTCGCCTATATAAACGCCAGCGTCACCTGAGACATTGTGTGGTATTCCGCTCGCTAGTGTTATCGTCAAATTACGCTGGCTAATTTGTTGCCTTTTCGTTCAAAGCAGTTGTCGTTGCTTCAAAGAGGGAAGGTGAGAGGAAACATGGCGACTTTACCTTTGGTTGTCAGACTTCTTGAAGAGCTAAACCAGCCAGCTTCCCTATTTGATCAGAATTTCGGTCTGGGAATGCTTGCGGACGATCTCATAGCTCCTCGTATTACTTCTGTTCCATTGCTATCGGGCTATTATAGA…	MATLPLVVRLLEELNQPASLFDQNFGLGMLADDLIAPRITSVPLLSGYYRPWRHQPTSRSGTSNIKNKKEGFEVSLDVQQFKPDEISVKMMDDFIVVEGKHDERKDEHGYISRQFTRRYKLPDDVELEQVVSKLSSDGVLTITAPKKALPPSESKERIVPIVHTNQPALTQSAPPKEAGDNEKQENMEQ*
TR63910|c0_g2	4.17427	3.91139	23.1061	0.000346811	0.0074044	0	0	0	0	0	0	0	0	0	0	0	AGAGAAACACTTAATAGTTAATTGGAAGATATGATTTACCAAATCTTCTGCTGCTTTCTCTCTGATGGGATTTATTATAACACTAGCATCATATCCCAAAAGTACCAAATGTGCTTGTCGAGTGTTAAGTGATGGATCATTAACGTATGTGAGGAATATGAAGGGACCCAAAACTGATTCTTTTGGGACTCAACTTGCAATATTTTTCCCCAGTCACTACAATTTCTACCTTTCTGCCATTGTCTGAATTATTCAGCACAACCTTTTCCATTCTATTTGTCAAGCATGATTCAGACCAGCTGTGCATAAAGTAATCAAATCCACAAGATGCGAGTTTTTCTTAGAGAGTATTATGATTTACATAACCAAAGGGCTCAGAGAGATCACAAAATATATCAG…	0
TR98067|c0_g1	4.17245	4.3256	20.3099	0.000596446	0.00851901	PE1_ANOGA^PE1_ANOGA^Q:364-2,H:36-137^33.61%ID^E:8e-09^RecName: Full=Peritrophin-1;^Eukaryota; Metazoa; Ecdysozoa; Arthropoda; Hexapoda; Insecta; Pterygota; Neoptera; Holometabola; Diptera; Nematocera; Culicoidea; Culicidae; Anophelinae; Anopheles	TR98067|c0_g1|m.19197	2-373[-]	PE1_ANOGA^PE1_ANOGA^Q:4-124,H:36-137^31.15%ID^E:4e-09^RecName: Full=Peritrophin-1;^Eukaryota; Metazoa; Ecdysozoa; Arthropoda; Hexapoda; Insecta; Pterygota; Neoptera; Holometabola; Diptera; Nematocera; Culicoidea; Culicidae; Anophelinae; Anopheles	PF01607.24^CBM_14^Chitin binding Peritrophin-A domain^2-46^E:1.1e-09`PF01607.24^CBM_14^Chitin binding Peritrophin-A domain^93-124^E:1e-05	0	0	0	KEGG:aga:AgaP_AGAP006795	GO:0005576^cellular_component^extracellular region`GO:0008061^molecular_function^chitin binding`GO:0006030^biological_process^chitin metabolic process	GO:0008061^molecular_function^chitin binding`GO:0006030^biological_process^chitin metabolic process`GO:0005576^cellular_component^extracellular region	CATTGTACTCTAGGCCAGCTGGGCATGGAATAAGCCAGGCAACGCCGTTCTCGTCACACTTGTAGAAGCTGCTGCAATCCTTTGGATTGGGAAGCTGGGTGACGTCATCCGGATTCCATGCTGGACAAGTGGGGACGTCGTCAGATGGTGGCGCAGGTGAAACTCCACTGTCGTTGGAACCACCACCAGTTTCATTGCCATTGTCGTCGTCAGCAGGAGCAGACGAAGATGAAGAACAGCCAGCTCGCTCTGGGAAGTCGCAGACCCTCAGCTTTGGATTGAACTCGAGGTTTGCTGGACATGGGATGACCGTTGCAACACCTGATGGCTCACACTGTAGGAAGCTCCTGCAGCTGCTGGGGTTCGGAAATGG	PFPNPSSCRSFLQCEPSGVATVIPCPANLEFNPKLRVCDFPERAGCSSSSSAPADDDNGNETGGGSNDSGVSPAPPSDDVPTCPAWNPDDVTQLPNPKDCSSFYKCDENGVAWLIPCPAGLEYN
TR55125|c1_g1	3.66362	2.21266	26.9842	0.000175175	0.00694482	0	0	0	0	0	0	0	0	0	0	0	GCTTTTAAAGCTAATTTTAAAATCTTTCTCCTGGGGAACTCGTTTTAGGCCATTGACGAATTTATACTTAAAAGTGTAGTTGCATGAGTAAACCAAAAATAACTATTTGTTGATTTATGTTAACACTAACCGCTTATACATATTCTGTACGCTGACTCGTTGTGCATCATTTCTATAAAATAATCGTTCAAATAATGTATGAAAAATGTACAGCAAGACTTGATATGAATTAAAATTGCTGTTATAGATTAATGTGCTTTACGTTATTTGTGAATTCCTAATTTTTTGTGGCATAGGTCAATTCTCAAACTAGGAAAGTACCTTAATGTCTGCTTAGTAGTGCTGTAGATATTAATATTAGATTTCTGACCAACATTCCAAAATTTTTCACGATTATAC…	0
TR55125|c0_g1	3.61321	3.38188	25.6853	0.000218439	0.00696692	0	0	0	0	0	0	0	0	0	0	0	GTAACATGTTGCTGAGCTTGTCAAGAATTAAGTGCAGCTGCTTTTGATCCTCATACAACTGCTGAAAACTTGAACGGGAAGAACCATGTTGCTGAGCTTGTCAAACAATTAAGTGCAGCTTCTTTTGATCCTCATACAACTGCTAATCATTGAAACGAACGTGTCAATCACCTGACATATATCCACTGAATAATGTCATACAGGCTAATTTTCTGGCGTAACTCATCACTCAGGAAGAAATTATTCATTGCACAAAAGGAAGCAGTAACAATAATATGTGTGTTCTCGCATGGACGTCATGCAGGTACAATTTCAAGAAGCTAGCCATTTTAACAGTTTCATTACAGTACATACATTCATGTATGAAGCTCATGGTAAATTATCCATCACAATTTGAGA…	0
TR87585|c0_g1	3.55645	2.21489	25.2311	0.0002364	0.00704774	0	0	0	0	0	0	0	0	0	0	0	TGACCACAGCAGTTGAGTCCCATAGTCCTCAGAGCCAATTACGGGACAGGCAGATTTCGATAACAACTCCTGTTGTCGTACTATCGGACACAACAAAACACCAAACTACTTTAAATATAATAACTGTTTATATTATGTCAAGCTAAATGTTACTTCTAGCTTGCAATTGTTCTCACACACAACAAAATTCTTACAATGCAGCACACTATGTCTGGAAAAGTATCGTAATCTTTTAATTACTTACAATATCTATATTCAATATATCGTCGTGTTACGACCAATTCACTTTAAGTTGCTCTCACCGATATCTATAAGGATTTAGATAATTGAAGCTATCATTAAATTTCTTTCTGTTTAGTCCAGCGTTCCTATGTAAATAATACGAAGTAACGTATTCCA…	0
TR90823|c0_g1	3.55094	1.23511	22.2919	0.000404221	0.00766232	0	0	0	0	0	0	0	0	0	0	0	CAGGCACACTCTTTGTTGCATTAGTTGATATTCCCATCTGTAGCAGAAAAATTATTGTTTAAAATATGACAAACATAAATATAAATTCTCTGAACCTATGCAGGTAGTGATAACACATACAGAAAAATAGTATCACAAACTACAAAATGCTATTCCCATCACAGAGTTTATGATGTGCATATTGAAAAGTGGCAACCATCTATTCCAATATTCTAAACAAAACAGAAAGCATGATAAAACAGAGACAAGACAGACCCAGAATTACATACAGAAAACTATAATAAGAGGAAGCGAGAATGTTTGAAAAACTTGCTATTTATTATTGAGACTTTCCCCTCCCACTTATATGGTACTCTTTTAAACCTGCAATGTTCTTCTCAATTTCCATAGTTAATAGCT…	0
TR75041|c0_g1	3.50169	2.12881	23.75	0.000308035	0.00728973	0	0	0	0	0	0	0	0	0	0	0	GCAGCAGCGACGTATGTGGCATGATCTGTTACTAAAAAATCATCCATAAAGTAAGATATAATGCGCCTAGTATATCTACAGATATGACTTGCTGCTACATCAAAATCATAAGTGTCAGTAATGTACCCAATGTATGAAACTTCCGGTTTAGATACTTGAAAATGGTTTAAGTCCGAAATTGTACAATCGTACAGGAAATAAATAGAATGGCAGCTGAAGGCTTCAAGAAATCATTCAAAAAATTCATCGCAGCTGCGGACCCTACCGCACTGAAAATTGTAAAATGCTAATTTACTCTTCTAACCTGCAGATTTGTTGTTGCCTTCAGACACATAAAAGAAATAAGAACGTAAGTTAAAGTGTGTATGTCGTTGTGTGTGTGTGTGTATGTGTGTGTGT…	0
TR75041|c2_g1	3.49044	3.74948	23.4579	0.000324967	0.0073289	0	0	0	0	0	0	0	0	0	0	0	GAAATTCAATAATAAAAATAAATAAATAAATAAACAAATAAAGTCCTAGGCACCACCTTAAGTAACAACTTAACACAATTCTGGGCCTCTTCAGGCGTTAGCAAAACTCGACGCGCTAAGTTCCCCAAATTGAAAAAGGTCACTTGTCACTTTGAGTAACAAAGATTTCGTTTAGTTGTTACTTGCAAATGGTTCCTTTTATCCTCGTCGCTTATCAACTCAACTACTGGTGCGACCTATCATATTACACTGAAACAGTTCGAATCCATAAGAGCCAATTCTAGGTCCGCTGTACGATTGTGGTATTTAAACAACAACAACAAAAATGTGTTCGACTCTTTTCCTTCTCGACACACGACAATCACTACCATACCACTCCAACAAGGCAGCTAACAACCC…	0
TR46182|c3_g1	3.41457	3.85158	21.2933	0.000490282	0.0079485	UDPE_NPVSL^UDPE_NPVSL^Q:128-1555,H:1-495^31.66%ID^E:2e-66^RecName: Full=Ecdysteroid UDP-glucosyltransferase;^Viruses; Baculoviridae; Alphabaculovirus	TR46182|c3_g1|m.5474	128-1669[+]	UD12_MOUSE^UD12_MOUSE^Q:18-511,H:27-525^31.46%ID^E:3e-69^RecName: Full=UDP-glucuronosyltransferase 1-2;^Eukaryota; Metazoa; Chordata; Craniata; Vertebrata; Euteleostomi; Mammalia; Eutheria; Euarchontoglires; Glires; Rodentia; Myomorpha; Muroidea; Muridae; Murinae; Mus; Mus	PF00201.18^UDPGT^UDP-glucoronosyl and UDP-glucosyl transferase^167-507^E:2.3e-84`PF04101.16^Glyco_tran_28_C^Glycosyltransferase family 28 C-terminal domain^353-429^E:4.2e-09	sigP:1^18^0.944^YES	ExpAA=44.51^PredHel=2^Topology=i5-27o477-499i	COG1819^Transferase	KEGG:mmu:22236`KO:K00699	GO:0005783^cellular_component^endoplasmic reticulum`GO:0005789^cellular_component^endoplasmic reticulum membrane`GO:0016021^cellular_component^integral component of membrane`GO:0043231^cellular_component^intracellular membrane-bounded organelle`GO:0019899^molecular_function^enzyme binding`GO:0015020^molecular_function^glucuronosyltransferase activity`GO:0046982^molecular_function^protein heterodi…	GO:0016758^molecular_function^transferase activity, transferring hexosyl groups	CTGGGACAGTCGGACCAGGGTAGTGGACGGAGAGGTACCGACTGTTCACGGGGCACGAGTCTTCTCTCCTGCCGGTTAACGCCCTCTCGTTACTTTCAAACAGCTGCCAGGTTTCTACTGAGGAACCATGTTGCGAGTGGTTGCAGTGTGGCTGCTGGCGCTGATGAGCGCATGCTCGGCAGCCAAGATCTTGGTGATCGCTCCAACCCCATCCATCAGCCACCAGCTGCCGTTCCATCTCCTGTCCAAGGCGCTGCTGCAGAGAGGACACCAAGTTACCCTCATGACGACGAACTCCCTTAAGATATCCCACGAGAACTATACCGAAATTGACTTATCGGTAGCTTACAACTACATAAGGGGTCAGTATGATTTTGTGAAGACATACGAAGAATCGCT…	MLRVVAVWLLALMSACSAAKILVIAPTPSISHQLPFHLLSKALLQRGHQVTLMTTNSLKISHENYTEIDLSVAYNYIRGQYDFVKTYEESLTQSMTIMRDLGRGSVDLQFGEPSVQKFIRSGETFDLAVLEGLAFMSYYGLIHRMGSPPVAKLLTLTAPSSVYYNFGSPMEPAYMPDMWLGYSDHMDFWQRLYNTYFYLRLMYMWFYQVMPLQEEVMRKYFGPDPPSVYEADRNVSLLIITNHFVLEYPRPHLPNIIEVTGIHVATEQKPLPKDIKKFLDEAKDGVIYFSLGSNVRSNAMPEWKRQAFIEAFRELPQRVLWKWENDSLPGQPDNLMISKWLPQEDILAHPNVRLFITQGGLQSLNEATYHAVPLLVIPFFSDQGHNAAKIQQAGIGVWL…
TR73100|c0_g4	3.40232	4.31146	13.3187	0.00296016	0.0157463	L2EFL_DROME^L2EFL_DROME^Q:95-589,H:1-171^51.45%ID^E:4e-42^RecName: Full=Protein lethal(2)essential for life;^Eukaryota; Metazoa; Ecdysozoa; Arthropoda; Hexapoda; Insecta; Pterygota; Neoptera; Holometabola; Diptera; Brachycera; Muscomorpha; Ephydroidea; Drosophilidae; Drosophila; Sophophora	TR73100|c0_g4|m.12891	95-643[+]	L2EFL_DROME^L2EFL_DROME^Q:1-181,H:1-183^49.21%ID^E:4e-47^RecName: Full=Protein lethal(2)essential for life;^Eukaryota; Metazoa; Ecdysozoa; Arthropoda; Hexapoda; Insecta; Pterygota; Neoptera; Holometabola; Diptera; Brachycera; Muscomorpha; Ephydroidea; Drosophilidae; Drosophila; Sophophora	PF00011.21^HSP20^Hsp20/alpha crystallin family^65-161^E:1e-25	0	0	ENOG410YERS^Heat shock protein	KEGG:dme:Dmel_CG4533`KO:K09542	GO:0048471^cellular_component^perinuclear region of cytoplasm`GO:0030018^cellular_component^Z disc`GO:0051082^molecular_function^unfolded protein binding`GO:0061077^biological_process^chaperone-mediated protein folding`GO:0007275^biological_process^multicellular organism development`GO:0042026^biological_process^protein refolding`GO:0010998^biological_process^regulation of translational initiatio…	0	CGGGCTCGAAGAGCACGATTTGCCGCCGTGTACGGAAAGTGCGCTAAACGAGCGAATCTTTCGAAGTTGATAGCAGCGCTTTCGTTCGTAAAAGATGGCTCTGACACCGATGATCCGCCACTTGCTTGACGATGTCGACAGACAGATGTCATTATTCGACCAAAATTTCGGCTTGGGTCTGACACACGACGATTTGCTTCTCCCTCGTCTGTCTGTCGTCCCTAGTCTTTCTGGATATTACAGACCATGGCGTCATTTGGCAGCTCGTAACTCCGGCGTATCTACCATTCAGAATAACAAAGATGGGTTTAAGGTCAATTTAGACGTCCAGCAGTTCAAACCGGAGGAGCTGACGGTAAAAGTGGTGGGCGACAGTGTGGTGGTAGAGGCAAAACATGA…	MALTPMIRHLLDDVDRQMSLFDQNFGLGLTHDDLLLPRLSVVPSLSGYYRPWRHLAARNSGVSTIQNNKDGFKVNLDVQQFKPEELTVKVVGDSVVVEAKHEERKDEHGYISRQMQRRYLLPKDVETDQVQTQLSSDGVLTISAPKKALPPAEDRERVVQIVQTGVPAVTNQQEQGGEKMEQ*
TR86506|c0_g1	3.37682	1.74643	20.6778	0.000553877	0.00828343	0	0	0	0	0	0	0	0	0	0	0	CATAGATGGTCAAGGCAACATTGATGAATGGGATGAAGTTCACATGCCTGTTTCATCTTCTGATGATGAGATTGTGAATGATCACATGTCACATTCAACTGTGAGCTCAAGCATCATATATCCATTCCTTCAGATGGGACAAGTCAATTAGGATCGGATGGATGCGTCTCTTCACCTCAGTGACAACACATCATAACGTGCTATCTTATTTTACTCCTCGTTTGCAGAAAACAGGAAAAAATTAGCTGTTTTCTTCTGTGCCTTTCTATTTCTTTCGTATCAAAAGCTCACTGCATGAAAGATGATGTATCAAGTGACAGTTTTGTGTACTGCAGCTCAATGCCTGAAATTTTTTTTAAGGGACTAAAACTTGAATCTCAG	0
TR50321|c4_g1	3.26996	1.62841	26.2588	0.000197969	0.00696612	0	0	0	0	0	0	0	0	0	0	0	GGAGCCAATGTTCAGAGACCTCATCCAACGATGCTACATAGCGTCAAAATTATAGGCGCCAGTGCCTTTAAATGTATGTGTGTAGATGGGTAAATGTATCAAGTTGAGATAGGGGTCCCATAACCAGAAACGAACTAACTGATAGTAGAGTACATGTACTGGTACTCAAGTTAGGAAGATTGTAGAGTAGGGAACTTTGAGAGATGGTTGTATGACCCAAAAAACGAAAAACGTGTAGTGAACATGGCTTATAAAATGCATACCTTAAGAGCTACAAGCACTGTTTCAATAGAAGCTCACAGCTCCTCAGACATGGAACTTTGAGCCCATTATTGCTGGACACTTTTTTCGTTCTTCTGATCCAGACTACCACCCTTGAAAGTTGCCTACCCTACAATC…	0
TR41963|c0_g1	3.19634	5.9456	23.0717	0.000349041	0.00741927	SPOP_DANRE^SPOP_DANRE^Q:1002-1406,H:213-347^43.7%ID^E:6e-25^RecName: Full=Speckle-type POZ protein;^Eukaryota; Metazoa; Chordata; Craniata; Vertebrata; Euteleostomi; Actinopterygii; Neopterygii; Teleostei; Ostariophysi; Cypriniformes; Cyprinidae; Danio	TR41963|c0_g1|m.4280	273-650[-]	0	0	0	ExpAA=21.86^PredHel=1^Topology=o15-37i	0	0	0	0	GTGTGTGTGTGTGTGTGTTATTTCGAGTAAATAAATTCCTTATAAATAGTATGTTTCTCCATTTTCGGAACTGCTCTTGTTCTACGACAGTTTTCTTCATTAGACGAGTGTATTTGGAGAAATGTGTGAGAACTCCTCAGTATTTTGCAGGGGCCTTACCGCAGAGCAGAAGCAGTAAAATTCGGAGGCGGCGGTGTTATGATGTGGTCGTGTTTTTCATGGAGGGGGCTTGCACTCCTTGATGTTTTGCGTGGCACTATCACAACAGAGGCCTAAATTAATGTTAAGTACCTTCTTTCTTCGCACTGTTGAAGAGCAATTCGAGGATGGCGATTGGGTCTTTTAACACGATTGATCACCTGTTCATAATGGAGGGCCTGTGGCGGAGCGGTTACACCT…	MTYNFVAPSVGDAGIQFGVGPLLALMTASTLTGSPLFTKCCTEEKNRCGSVMPGSKLAFQNIPMVFCRIQAMTMCTPVHYRDDRGVTAPPQALHYEQVINRVKRPNRHPRIALQQCEERRYLTLI*
TR52666|c0_g1	3.15441	1.65694	17.4061	0.00110521	0.0102997	TNKS2_MOUSE^TNKS2_MOUSE^Q:925-1152,H:54-129^47.37%ID^E:8e-09^RecName: Full=Poly [ADP-ribose] polymerase tankyrase-2 {ECO:0000305};^Eukaryota; Metazoa; Chordata; Craniata; Vertebrata; Euteleostomi; Mammalia; Eutheria; Euarchontoglires; Glires; Rodentia; Myomorpha; Muroidea; Muridae; Murinae; Mus; Mus`TNKS2_MOUSE^TNKS2_MOUSE^Q:934-1152,H:644-717^41.33%ID^E:5e-06^RecName: Full=Poly [ADP-ribose] poly…	TR52666|c0_g1|m.7123	1-1302[+]	TNKS1_HUMAN^TNKS1_HUMAN^Q:310-419,H:213-322^47.27%ID^E:3e-17^RecName: Full=Poly [ADP-ribose] polymerase tankyrase-1 {ECO:0000305};^Eukaryota; Metazoa; Chordata; Craniata; Vertebrata; Euteleostomi; Mammalia; Eutheria; Euarchontoglires; Primates; Haplorrhini; Catarrhini; Hominidae; Homo`TNKS1_HUMAN^TNKS1_HUMAN^Q:312-400,H:802-891^40.66%ID^E:1e-10^RecName: Full=Poly [ADP-ribose] polymerase tankyrase…	PF12796.7^Ank_2^Ankyrin repeats (3 copies)^317-404^E:5.4e-14`PF13857.6^Ank_5^Ankyrin repeats (many copies)^332-383^E:1e-06`PF13606.6^Ank_3^Ankyrin repeat^346-374^E:0.00051`PF13637.6^Ank_4^Ankyrin repeats (many copies)^347-399^E:2.3e-13`PF00023.30^Ank^Ankyrin repeat^347-375^E:0.00022`PF13857.6^Ank_5^Ankyrin repeats (many copies)^365-419^E:2.6e-11`PF00023.30^Ank^Ankyrin repeat^379-410^E:0.00012	0	0	COG0666^Ankyrin Repeat	KEGG:hsa:8658`KO:K10799	GO:0000781^cellular_component^chromosome, telomeric region`GO:0005737^cellular_component^cytoplasm`GO:0005829^cellular_component^cytosol`GO:0005794^cellular_component^Golgi apparatus`GO:0000139^cellular_component^Golgi membrane`GO:0097431^cellular_component^mitotic spindle pole`GO:0016604^cellular_component^nuclear body`GO:0000784^cellular_component^nuclear chromosome, telomeric region`GO:0031965…	GO:0005515^molecular_function^protein binding	AGCAGACGTGCACCAGCCACTACACACGTGAGGCCCACCAACACGGGCGACACCACCAAAACCACTGGGACCACCGCAACCATCGCCATCACCACCGCTGCGTTCACCTCTGCTGGCACACACCTCCAGACTCCTGCCACAGCTGTACTGCCTAAGTCACCTCCACCTACCAGACGCGCACCAGCCAATACACACATGAGACCCAGCAGCGGAACAACAACAACCACCACCAGCAGCAGCACTGCAACAACAACCAGCACTGCAACCACCGCCGTCACCACCGCCGCCTCCACCTCTGCTGGCGCACACAGACAGAGACCAGCTGCTGCTGTAGTGCCCAAGACGCCTCCACCTAGCAGGCGGAGCAGCGCACCAGCCAATACACACATGAGACCCAGC…	SRRAPATTHVRPTNTGDTTKTTGTTATIAITTAAFTSAGTHLQTPATAVLPKSPPPTRRAPANTHMRPSSGTTTTTTSSSTATTTSTATTAVTTAASTSAGAHRQRPAAAVVPKTPPPSRRSSAPANTHMRPSSGTTTTTTSSSTATTTSTATTAVTTAASTSAGAHRQRPAAAVVPKTPPPSRRAPPTTHMRPSTTATTTTTTTSATTAITTAADSNFNGTHLQSPAASVVPKTPPPSRRAPATTAAAVVPKTPPPSRRSPAAAQMRPTTSATVITSAGTPRQTPAAAAPQKTLAPDEATVSRMRSLSAERRDSRLIDAAKRGAVGEMRTLLAAGANVAARDSGQRTPLHWAAVWGHTAVVRLLLDASLDPNARSSGGWTPLHFAAWSAHAEVAAALL…
TR52383|c0_g1	3.15051	6.18502	22.5565	0.000384433	0.00760859	0	TR52383|c0_g1|m.6981	156-587[+]	0	0	0	0	0	0	0	0	TTTTTTTTTTGAACAAAAAAATATAATTTATTTAAACTAATATTAAAAGAGTACACGATTCTGTAATGTATCAAAATAACTGAAGACGTTTTCAGATCATCAGCTGGTGTGCTGGGAGACACGCAGCAGCCGACGTTGCCCTGTGACGTGGTCTGATGCTGCGCAGTCGCCACCGGCGGCCCGTGTTACAGCCCTGCTCAGATGTCGCCAGCACGCGACGGCGCCCACTCATTGGAGTCCGGCAGCCTGCGCCCCGCGTGACCAGCGGAGGCGGCGCCGCTGGAGGCTCTGCTGGAGAAGTGGTCTCGGTGCCCTGCCGGCGCCCACTCGTTGCTGTCGGGCAGCCTAGGGCTCGGCGCCGACGCCGCCGCTACCCTTCCAGCCGGCGCCGCCTCCGCG…	MLRSRHRRPVLQPCSDVASTRRRPLIGVRQPAPRVTSGGGAAGGSAGEVVSVPCRRPLVAVGQPRARRRRRRYPSSRRRLRGVLPPGELLQAAAELLLVHRWSLHRCRPGRHVGAPARHRGAHTLPDAEHLSCSVSSTLQLLV*
TR103506|c0_g1	3.08842	2.84127	18.5512	0.000860346	0.00943486	0	0	0	0	0	0	0	0	0	0	0	GTTTAAATAATTCAATTTATTATAAGAGACAATAAATAAAAAATTCACAAATTCAAGCAAAGATGCTGCTTCTTCACTTATTCAAACACAAATACGCCTTCCAAATAAGCTCAACTGTTTCCATACCTCAAGTTAGGTCACCCAAATAGCACTAGAGACAAACATATTTGCTACAGTATTCGGCCGTGAAGAACATTATTAATATGACAACAGTATAACAGTTTACAAAGATTTGAACATATTTCTAGGACAAAGTTTTCAACATTTGACACTGTTACTTAAGGTGGTATTTCCTCTAATTAGAAGCTAAACAGAAAAACTGTCTCGAAGGAAACTGTCATTAAAGGAACATCCTTACATGGAATTGTTTCATCCCTCTGCACCCAAGTTATCATGTGA…	0
TR51583|c0_g1	2.99859	2.38721	15.4047	0.00175619	0.012266	0	TR51583|c0_g1|m.6797	49-903[+]	0	PF12974.7^Phosphonate-bd^ABC transporter, phosphonate, periplasmic substrate-binding protein^22-258^E:1.8e-28	0	0	0	0	0	0	CTGCCGGCAAGTGCGCTCGCGTTCGGCGTCCCAAGCTAAGCGATCAACATGAGCAACCAGAAGAAGCAGAAGCTGCGGCTTGTGACTTACATGTGCCCCAGTCACCCGGTGGAAATGTACGAGCTGATCATGACGTACCTGGAGCGCTACACTGGGCTGGAAGCCACTCTCCAGTATGAGTCCAGAAGAGCTGGCCCCCTCCCGGGAAGAGTTGACCCCTTCACAGACGACACAGTAGACATAGGATTCATGAGTGTGTTATCATTCTTGGAGCTACTAGACAACAAGAATAAATATGCAGAGCTGTTGCCAGTTACACCAGTGTTCAGGCACAGAAAAAACAAGGATGATGTAGCAGGTTATTATTCTGACATCATCATTCACATTGATGGCAAGAAA…	MSNQKKQKLRLVTYMCPSHPVEMYELIMTYLERYTGLEATLQYESRRAGPLPGRVDPFTDDTVDIGFMSVLSFLELLDNKNKYAELLPVTPVFRHRKNKDDVAGYYSDIIIHIDGKKHVKELLDLRGSTWAYSTDESLSGYKIVLKTLKEHGENSTFFGNTLQSGSHLQSIQMVLTKQAEAAAVDSNTLAYNKRYLQDQGKDVLVLDSIGPLPPYPIVVNSRMDGELKETIVRALKSFDKSEIWQTKFAQYGIQKFVTNHVDSYDKLRTVTEYIRDLNHAIRYY*
TR50321|c5_g1	2.99014	4.38523	26.0613	0.000204757	0.00696612	TCB1_CAEBR^TCB1_CAEBR^Q:1825-2019,H:38-102^38.46%ID^E:4e-11^RecName: Full=Transposable element Tcb1 transposase;^Eukaryota; Metazoa; Ecdysozoa; Nematoda; Chromadorea; Rhabditida; Rhabditina; Rhabditomorpha; Rhabditoidea; Rhabditidae; Peloderinae; Caenorhabditis`TCB1_CAEBR^TCB1_CAEBR^Q:2030-2254,H:110-169^30.67%ID^E:4e-11^RecName: Full=Transposable element Tcb1 transposase;^Eukaryota; Metazoa; Ecd…	0	0	0	0	0	0	COG2124^Cytochrome p450	0	GO:0005634^cellular_component^nucleus`GO:0003677^molecular_function^DNA binding`GO:0015074^biological_process^DNA integration`GO:0006313^biological_process^transposition, DNA-mediated	0	AGATCATTCACACAATTTTTTTTCAATCACAAGTATATTTAGAAGCTTGTAACTGGAATTTCCAAACACCTTCTATATATATGCCATCTGGCACATCGATATCATAGTCGGTTACTGCAATAAAAGACAACTGCTTTTGTGAGGTACGATGCAGCAGAATGCTTGAAACAATACTTTCCGTTTTCCAGTTCTACCTATTCATCGTTATTTGCTTCATTGTAAAGCTCTATGTTTACACCAGATCATTCACACAATTTTTTTCAATCACAAGTATATTACAAACGAACCTTGGTTAAGTAGTGCTTGAAGCACTGCCCCCTTATGAAATCTCCCCTGTCATAATTCTGCATTGGACACTAAGAGAATACAAGCCAGTCCAGTGCTATATAACATTTTACA…	0
TR43491|c0_g1	2.9593	2.52023	12.5898	0.00359127	0.0174188	0	0	0	0	0	0	0	0	0	0	0	AATAAATGCTTGTGGGGAACCAGAAAAAATTCTTGAAATATATTTGGGTGAAATGCAGTTCATTGTCTCGTAATCTCAAGGTCAGTGCCACAGTTCATAAGACAGACCCCACAAAAAGAACATATCAATGAGGTAAACCATCTCACTATCGTAGAGACAGGTGTCATAAATAAGAATGTTAACTGCAATGAAAGATTTAAAACTGGTTTCCGTAGCCTGTAGATCATTGTTCATTTTGGGGAAATCAAATAAAGCCTTCGATGTAAAGCCCGTATTTAGGTTTGTAATTTGTGTGATAGTGCAATTCTTTCTAGTGTAGGGGATTAAGAGATTTGATTGTTTTGAAATATATTCTTTGTATTCTAAATGTAAAATCTGCTGAATAGTATTCACAGTAAT…	0
TR105047|c0_g1	2.83165	2.10701	11.5818	0.0047403	0.0204453	0	0	0	0	0	0	0	0	0	0	0	TTTCACCAGGTTTTTTCATAGTTACTATGACAACTTACTGTGATATACACACACTAATTTGAAATATCAGGGTCGTGATGACATGAAAGGACTCCTCTATTGTTGCCAATTTACATTAAGGAATGACAATCCTGTTCTTTTAATGTTGCTGGCATAAAACGTAGGTAACTGTTCCCTTTGAATGTAATAAATGAAAACATTATAATTTAGTCAGGATGCTTTTTGTCATCTTTGGAAAAGTAGAGGGAATTAAAAAAATCATGATGAAGTTGTAATTTTTTTCTAATTTTCTAGTGGTAAGGTAAAAGATTTTCCTTATCCTATTAAGATGAGGAAAGAACTAGCAATCACCTAAAGATTTCGTGGCCACAAAAAACAAAGAGGTTATTTACAGGTAAA…	0
TR36797|c0_g2	2.80413	2.33008	13.6944	0.00268569	0.014975	L2EFL_DROME^L2EFL_DROME^Q:634-275,H:50-170^54.55%ID^E:6e-36^RecName: Full=Protein lethal(2)essential for life;^Eukaryota; Metazoa; Ecdysozoa; Arthropoda; Hexapoda; Insecta; Pterygota; Neoptera; Holometabola; Diptera; Brachycera; Muscomorpha; Ephydroidea; Drosophilidae; Drosophila; Sophophora	TR36797|c0_g2|m.2766	206-745[-]	L2EFL_DROME^L2EFL_DROME^Q:38-157,H:50-170^54.55%ID^E:3e-37^RecName: Full=Protein lethal(2)essential for life;^Eukaryota; Metazoa; Ecdysozoa; Arthropoda; Hexapoda; Insecta; Pterygota; Neoptera; Holometabola; Diptera; Brachycera; Muscomorpha; Ephydroidea; Drosophilidae; Drosophila; Sophophora	PF00011.21^HSP20^Hsp20/alpha crystallin family^60-154^E:7e-28	0	0	ENOG410YERS^Heat shock protein	KEGG:dme:Dmel_CG4533`KO:K09542	GO:0048471^cellular_component^perinuclear region of cytoplasm`GO:0030018^cellular_component^Z disc`GO:0051082^molecular_function^unfolded protein binding`GO:0061077^biological_process^chaperone-mediated protein folding`GO:0007275^biological_process^multicellular organism development`GO:0042026^biological_process^protein refolding`GO:0010998^biological_process^regulation of translational initiatio…	0	TTTTTTTTTTTTTTTTTTATTTCTCTGTGCTTTATTCATAAAATGTTCTTAGAAAAGTACATTACTCAAATCTGGTGAAGCCAGTCTTACAGTTGCAGTAGAAGAAATACATAAAAAAGGTAAATAATGGAATGCTCAATCAGTCTTTTTATTCCAGAAAATGGAATCTTTCAAATGGAGTAATACTTCACATAAAGTTCATTATTTATGCTTCCATTTTCTCCTGCTTAACATCTGGATTCTCATGTCCTGCTTTCGCGATAGCTGGTTTATTTGTCTGCACAATAGGCACTACACGCTCAGTTGAGTCTTTTAAGGGTGCCTTTTTGGGTGCTTTAATGGTGAGAACACCATCTGATGATAACTTTGATGTTACAGCATCTATGTCAGTATTTTCAG…	MAFCPLSALVEEHLPIADHGSRIFSDDIFIPRSITMPLRSGYLRSWRHQPFRRSGKSHIRKWKGGFEVNLDVQHFKPDEVSVKIRDDFIVIEGNHEERQDEHGFISRQFTRRYKLPENTDIDAVTSKLSSDGVLTIKAPKKAPLKDSTERVVPIVQTNKPAIAKAGHENPDVKQEKMEA*
TR57559|c0_g2	2.78966	2.76966	16.6177	0.00132104	0.0110018	0	0	0	0	0	0	0	0	0	0	0	TTGAATCAGTGGTAGGTGATACTTGGGAGAAGGTATGACCGATCAGTCCTCGATTTTAGGAAAAGCTGGTTGGAATAAGCAAAGAGGCAGCCCTCAGTCAGATTTAGTCAGTTTGTACTGAAGGCAGAATAAATAAGATGAGAGATTCTTGTTGGCCTGTCAGAAGAGTGGTACCCAAGGCGGTTCACCGTTTAGGTACAGTCGGCAACTGGATTTGTATAAGAAGAAACCTGCAGCTGGGCCCTGACGCAGTTGAGCACAGGTTACAGCACCCTCATTTATGTGCAGCCCAGGTTGCACATTCAAAGCTCGTGAACACATTCACTAAGGCCGTTCGCTATACTTTCCATACACCAGGCAACTGGTGTGAGACTATGATTTTCTCGGCAGTAGTGACCA…	0
TR16399|c0_g1	2.78162	2.16536	26.4487	0.000191687	0.00696612	0	0	0	0	0	0	0	0	0	0	0	GGTGACGTCAGCAGCCACTGACTTCCAGACTCGACTCGATGAGAGCAGCAACCGCCTGGTAATCACCACGACAAAGGATGGCCAAGATGTTGAAGTCGGCTATGTCACAGTTGAAGACACCACGGGCTCTCGCAAACTGTGCTCTGACCCTGAGTCTGATGATAACTGTCTACCATTCCCCGAGCCAACAATCACCACACATCGTCAAGGTCGAGCCCTCGTTTGTGCCAC	0
TR34381|c1_g1	2.70326	5.65184	24.471	0.000270425	0.0071856	MYORG_HUMAN^MYORG_HUMAN^Q:2-214,H:646-714^49.3%ID^E:3e-08^RecName: Full=Myogenesis-regulating glycosidase {ECO:0000312|HGNC:HGNC:19918};^Eukaryota; Metazoa; Chordata; Craniata; Vertebrata; Euteleostomi; Mammalia; Eutheria; Euarchontoglires; Primates; Haplorrhini; Catarrhini; Hominidae; Homo	TR34381|c1_g1|m.2319	2-343[+]	MYORG_HUMAN^MYORG_HUMAN^Q:1-71,H:646-714^49.3%ID^E:3e-10^RecName: Full=Myogenesis-regulating glycosidase {ECO:0000312|HGNC:HGNC:19918};^Eukaryota; Metazoa; Chordata; Craniata; Vertebrata; Euteleostomi; Mammalia; Eutheria; Euarchontoglires; Primates; Haplorrhini; Catarrhini; Hominidae; Homo	PF01055.26^Glyco_hydro_31^Glycosyl hydrolases family 31^4-70^E:1.8e-10	0	0	COG1501^hydrolase, family 31	KEGG:hsa:57462	GO:0005789^cellular_component^endoplasmic reticulum membrane`GO:0016021^cellular_component^integral component of membrane`GO:0031965^cellular_component^nuclear membrane`GO:0004553^molecular_function^hydrolase activity, hydrolyzing O-glycosyl compounds`GO:0005975^biological_process^carbohydrate metabolic process`GO:0043568^biological_process^positive regulation of insulin-like growth factor recept…	GO:0004553^molecular_function^hydrolase activity, hydrolyzing O-glycosyl compounds`GO:0005975^biological_process^carbohydrate metabolic process	CACGGCCCTCGCCATAAACTCAGAGTTCCTGCTTGGAGAAGACCTGTTGGTGGCGCCGGTGCTGGAGGAGGGCTCAGACAGCCGTGACATCTACCTGCCCAGGGGCATCTGGAGGGACGAGGCGGACCCAAAACACCCAGTCATAGAGGGCCCCGTCTGGCTCACCAACTACTCGGCTCCACTCAGCGTCCTGCCTTACTTCACCCGAGCCTCTGGTCTCCCTGACGCCACTGGAGGTTCCTCACAGATTCGACTGTTCACTCCTGCAACAGGTTCCAGTTGGGCAAGCAGTACTGTACTTTTGTACGTTTCTTCACTTGCCTTCCACCGATTGCTTACATAATTTGCTTGTCGTTCACCTTCAATAATGTCTTACAAACGTTAACTCTTGCCTTTAAA…	TALAINSEFLLGEDLLVAPVLEEGSDSRDIYLPRGIWRDEADPKHPVIEGPVWLTNYSAPLSVLPYFTRASGLPDATGGSSQIRLFTPATGSSWASSTVLLYVSSLAFHRLLT*
TR75043|c0_g1	2.67995	8.11164	17.1931	0.0011592	0.0104942	BIP_DROME^BIP_DROME^Q:3035-1455,H:29-508^82.92%ID^E:0^RecName: Full=Endoplasmic reticulum chaperone BiP {ECO:0000305};^Eukaryota; Metazoa; Ecdysozoa; Arthropoda; Hexapoda; Insecta; Pterygota; Neoptera; Holometabola; Diptera; Brachycera; Muscomorpha; Ephydroidea; Drosophilidae; Drosophila; Sophophora`BIP_DROME^BIP_DROME^Q:1392-1141,H:569-656^55.68%ID^E:8e-19^RecName: Full=Endoplasmic reticulum cha…	TR75043|c0_g1|m.13249	1338-2678[-]	BIP_DROME^BIP_DROME^Q:1-408,H:148-508^84.07%ID^E:0^RecName: Full=Endoplasmic reticulum chaperone BiP {ECO:0000305};^Eukaryota; Metazoa; Ecdysozoa; Arthropoda; Hexapoda; Insecta; Pterygota; Neoptera; Holometabola; Diptera; Brachycera; Muscomorpha; Ephydroidea; Drosophilidae; Drosophila; Sophophora	PF00012.20^HSP70^Hsp70 protein^1-322^E:6.9e-159`PF06723.13^MreB_Mbl^MreB/Mbl protein^18-251^E:1.3e-14`PF00012.20^HSP70^Hsp70 protein^363-408^E:1e-15	0	0	COG0443^Heat shock protein	KEGG:dme:Dmel_CG4147`KO:K09490	GO:0005737^cellular_component^cytoplasm`GO:0012505^cellular_component^endomembrane system`GO:0005783^cellular_component^endoplasmic reticulum`GO:0034663^cellular_component^endoplasmic reticulum chaperone complex`GO:0005788^cellular_component^endoplasmic reticulum lumen`GO:0005615^cellular_component^extracellular space`GO:0016020^cellular_component^membrane`GO:0005634^cellular_component^nucleus`GO…	GO:0000902^biological_process^cell morphogenesis	GGTTGAACAACATCTTCGAGCTTCTTCTTTTGCTGCTTGAATTCTTCTGTTTCAGCATCTTGATTATCTTCCAACCATTTCACTGCTTCATCAACTGCTTCTTCTATTGTTGTCTTGTCACTGTCACTTAGCTGAAATTAGAGACAACACTATAGTGTAACTCTTACACATTAACTTGGGACAATATTTAGTGCAAATAATTTTCATTTTACTAGTGAATATTTTCTGGATAAAGATCAAATATTCTGCAACAACTGCAAGATGAGTAACATTAATGCTATATTGTTAGTAGCAAATTTCCTTTTCATAGATTAAACTGCAAGATGAGTAGCATTAATGCTATATTGTGAGTAGCAAATTTCCTTTTCATAGTATTACTACACTCCATTCTGGATTTTT…	MVLGKMKETAEAYLGKKVTHAVVTVPAYFNDAQRQATKDAGTIAGLVVMRIINEPTAAAIAYGLDKKEGEKNVLVFDLGGGTFDVSLLTIDNGVFEVVATNGDTHLGGEDFDQRVMDHFIKLYKKKKGKDIRKDNRAVQKLRREVEKAKRALSSSHQVRIEIESFFEGEDFSETLTRAKFEELNMDLFRSTMKPVQKVLEDAGMTKKEVHEIVLVGGSTRIPKVQQLVKEFFSGKEPSRGINPDEAVAYGAAVQAGVLSGEQDTDAIVLLDVNPLTLGIETVGGVMTKLIPRNTVIPTKKSQIFSTAADNQHTVTIQQHTVTIQVSAILHVMTLLLGTVQNFYLLEEYVLCSHFELTPYSQYFQVYEGERPMTKDNHLLGRFDLTGIPSAPRGVPQIEV…
TR66040|c3_g14	2.67008	1.99802	7.25175	0.0185005	0.0493445	0	0	0	0	0	0	0	0	0	0	0	GCTGGCAACAAAGGATAAGGGTTGCGCTCGTTGCGGGACTTAACCCAACATTTCACAACACGAGCTGACGACAGCCATGCAGCACCTGTCTCATAGCTCCCGAAGGCACCAAGGCATCTCTGCCAAGTTCTATGGATGTCAAGACCAGGTAAGGTTCTTCGCGTTGCATCGAATTAAACCACATGCTCCACCGCTTGTGCGGGCCCCCGTCAATTCATTTGAGTTTTAGTCTTGCGACCGTACTCCCCAGGCGGCTTGTGCGGGCCCCCGTCAATTCATTTGAGTTTTAACCTTGCGGCCGTACTCCCCAGGCGGTCGACTTATCGCGTTAGCTGCGCCACTAAGGTCTCAAAGACCCCAACGGCTAGTAGACATCGTTTACGGCATGGACTACCAGGG…	0
TR102591|c1_g1	2.64113	6.05841	18.3072	0.000906763	0.00966746	PE1_ANOGA^PE1_ANOGA^Q:316-447,H:34-77^47.73%ID^E:4e-06^RecName: Full=Peritrophin-1;^Eukaryota; Metazoa; Ecdysozoa; Arthropoda; Hexapoda; Insecta; Pterygota; Neoptera; Holometabola; Diptera; Nematocera; Culicoidea; Culicidae; Anophelinae; Anopheles`PE1_ANOGA^PE1_ANOGA^Q:283-450,H:97-152^42.11%ID^E:9e-06^RecName: Full=Peritrophin-1;^Eukaryota; Metazoa; Ecdysozoa; Arthropoda; Hexapoda; Insecta; Pter…	TR102591|c1_g1|m.576	1-453[+]	PE1_ANOGA^PE1_ANOGA^Q:95-150,H:97-152^42.11%ID^E:2e-07^RecName: Full=Peritrophin-1;^Eukaryota; Metazoa; Ecdysozoa; Arthropoda; Hexapoda; Insecta; Pterygota; Neoptera; Holometabola; Diptera; Nematocera; Culicoidea; Culicidae; Anophelinae; Anopheles`PE1_ANOGA^PE1_ANOGA^Q:106-149,H:34-77^47.73%ID^E:1e-06^RecName: Full=Peritrophin-1;^Eukaryota; Metazoa; Ecdysozoa; Arthropoda; Hexapoda; Insecta; Ptery…	PF01607.24^CBM_14^Chitin binding Peritrophin-A domain^106-149^E:1.1e-12	0	0	0	KEGG:aga:AgaP_AGAP006795	GO:0005576^cellular_component^extracellular region`GO:0008061^molecular_function^chitin binding`GO:0006030^biological_process^chitin metabolic process	GO:0008061^molecular_function^chitin binding`GO:0006030^biological_process^chitin metabolic process`GO:0005576^cellular_component^extracellular region	GCTGGATGTTCTGGTGGCTCTGGAACGACGTCAAATCCAAATAGTTCTACACCTTCATCAAGCAGTGCTGCCACTACTGAAGCTTCTACTTCTGCTCCAAGTTCTACAGCCATACCAACCACCGCTGCACCTAGCACAACAGCCAAACCTCCTACAGTTGCACCAACCACAACAGCTCAACCAACGACTGTGGCACCAACCACAACAGCCAAACCCACCACAGCTGCACCTAGCTCTACTGCGAGTCCTAATGTAGAGCCTTGCGATGCAGTTGGATCTTGTCCTGTGTATGACCAGGACTCTATTGTGAAGCACCTGGCACACAGAACAAATTGTGGGCTATACTGTAGGTGCAACCATGGTGTACCAATTACGGAAAAATGTCCGGATGGCCTACAT…	AGCSGGSGTTSNPNSSTPSSSSAATTEASTSAPSSTAIPTTAAPSTTAKPPTVAPTTTAQPTTVAPTTTAKPTTAAPSSTASPNVEPCDAVGSCPVYDQDSIVKHLAHRTNCGLYCRCNHGVPITEKCPDGLHFNAKLEVCDWPSDAGCQ*
TR84507|c0_g1	2.63171	2.11993	12.1425	0.00405579	0.0186782	0	0	0	0	0	0	0	0	0	0	0	GGGACAAAAAAATTGTTAATGTTAATACAGTGTGTTTGCGAGTACATTTTCATAGAGTCATAACAACGTGGTAATCACAAAAATTGCACGTGATAAAGATGACAGCAGCATGAATAACAGTATGTTCTAGTTAGGAAAGTAAGAGAAACCCACTCGTGATGGTGAATCTTCACAGACACTTGTATGAGTGAAAAAAGACGGAAGGTAAGTACAGGCAGTGCAGAATCCTTTCGTAAACATATTTATTTGAAAGCAAACACGGAAACAGGAAACATAACATTAACCTGAAGCTGAAGTACACTGCTGTGTTCCGTTAGTTTCACCACCTAAAAATGTAGTTATATAGGCGTTAATATACAAAATTTGCCCCATTTATTTCGACTATAAGACAATAGAGGT…	0
TR52701|c4_g5	2.6316	1.96062	19.3944	0.000719851	0.00897986	MYRO1_BREBR^MYRO1_BREBR^Q:1-306,H:34-135^57.84%ID^E:4e-28^RecName: Full=Myrosinase 1 {ECO:0000303|PubMed:11804799};^Eukaryota; Metazoa; Ecdysozoa; Arthropoda; Hexapoda; Insecta; Pterygota; Neoptera; Paraneoptera; Hemiptera; Sternorrhyncha; Aphidomorpha; Aphidoidea; Aphididae; Macrosiphini; Brevicoryne	TR52701|c4_g5|m.7193	1-306[+]	MYRO1_BREBR^MYRO1_BREBR^Q:1-102,H:34-135^57.84%ID^E:4e-35^RecName: Full=Myrosinase 1 {ECO:0000303|PubMed:11804799};^Eukaryota; Metazoa; Ecdysozoa; Arthropoda; Hexapoda; Insecta; Pterygota; Neoptera; Paraneoptera; Hemiptera; Sternorrhyncha; Aphidomorpha; Aphidoidea; Aphididae; Macrosiphini; Brevicoryne	PF00232.18^Glyco_hydro_1^Glycosyl hydrolase family 1^1-102^E:7.9e-42	0	0	0	0	GO:0102799^molecular_function^glucosinolate glucohydrolase activity`GO:0046872^molecular_function^metal ion binding`GO:0019137^molecular_function^thioglucosidase activity`GO:0005975^biological_process^carbohydrate metabolic process	GO:0004553^molecular_function^hydrolase activity, hydrolyzing O-glycosyl compounds`GO:0005975^biological_process^carbohydrate metabolic process	TGGGACCACATGCTGCACGAGCATCCAGAGTGGGGCTGGAACGGCCAGAACGGCGACGTGGCATGCGACTCGTACCACAAGTACGCCGACGACGTGGAGTGCCTCGTGAACGCCTCGGCCGACGCGTATCGGTTCTCCATCTCATGGCCGCGGATACTACCGACTGGAGACCTTGACAACATCAACCAGGCCGGCATCGACTACTACAACAACCTCATCAACCTGCTGCTCGCCAACAACATCCAGCCTCTGGTGACGATGTACCACTGGGACCTGCCACAGGCGTTGCAGTACATCGGAGGCTGG	WDHMLHEHPEWGWNGQNGDVACDSYHKYADDVECLVNASADAYRFSISWPRILPTGDLDNINQAGIDYYNNLINLLLANNIQPLVTMYHWDLPQALQYIGGW
TR82349|c0_g2	2.6094	4.68279	21.0306	0.000516335	0.00804862	0	TR82349|c0_g2|m.14939	2352-2663[-]	0	0	0	0	0	0	0	0	CTGGCATTCACAACATCTCATACTCTCAGCAAAATAAATATATTTATAGTAATAAATAATGATTTTGAGTGTCAAAACACATGCAGGTCTCTTATCATAAAACACTAATATAATTACAAATTCCTGACTGCAAACAAAAATACAAATTTGGCATGAAAATAAAATTAAATTATTTTTCCAAAATATGTATGGCTTTCAACACAAAATACATATGGCAGTATTAGCTTAACTTAATTCTTCTATAAGATTTTTTGTTGACAACCAAAGTTTTATCTTTGTACCACGCTTTACAAGCACAATAGACATACAAACTGAATATTTCTACACAGAAATTGGGCAATATTATCTTAACTTAATTCTTCTATACGATTTTTTGTTGACAACTAAAGTTTTATCTTT…	MMKKKTLITNVNYKENYMYVKREAGCIGGDHEDEVYSEEDDDEQDEVYNELEVNLQRISSRYRTCLLELPEWICREICSLLASKAVGKNSNDNEIKIQMTMKY*
TR100116|c0_g1	2.59979	2.94843	26.872	0.000178493	0.00694482	0	0	0	0	0	0	0	0	0	0	0	GGCAACTGGACCGACGAGGTTGACCCGGAACACCCCATCATAGAGGGACCCATCTGGCTCACCAACTACTCGGCCCCGCTCAGCGTCCTGCCATACTTCACCAGAGTCCCTAATTCTTGAGCATTACGCTTCACAATTGTCAACCGCCTTTGGGATCTGAAATAAAGTCTTATTACGCAATCTGGCAATATTGTTGTGAATTTATTCACCAACTTACTTTGACGGGCAGACCCTCATCATAGCTTT	0
TR69767|c0_g1	2.57232	1.64622	15.3471	0.00178072	0.0123074	TRY1_ANOGA^TRY1_ANOGA^Q:1485-2081,H:71-274^35.29%ID^E:2e-29^RecName: Full=Trypsin-1;^Eukaryota; Metazoa; Ecdysozoa; Arthropoda; Hexapoda; Insecta; Pterygota; Neoptera; Holometabola; Diptera; Nematocera; Culicoidea; Culicidae; Anophelinae; Anopheles`TRY1_ANOGA^TRY1_ANOGA^Q:471-851,H:47-173^40.16%ID^E:2e-23^RecName: Full=Trypsin-1;^Eukaryota; Metazoa; Ecdysozoa; Arthropoda; Hexapoda; Insecta; Ptery…	TR69767|c0_g1|m.11992	381-866[+]	TRY7_ANOGA^TRY7_ANOGA^Q:31-157,H:41-167^44.09%ID^E:3e-29^RecName: Full=Trypsin-7;^Eukaryota; Metazoa; Ecdysozoa; Arthropoda; Hexapoda; Insecta; Pterygota; Neoptera; Holometabola; Diptera; Nematocera; Culicoidea; Culicidae; Anophelinae; Anopheles	PF00089.26^Trypsin^Trypsin^33-157^E:3.2e-27	sigP:1^17^0.899^YES	ExpAA=16.75^PredHel=1^Topology=o4-26i	COG5640^protease	KEGG:aga:AgaP_AGAP008293`KO:K01312	GO:0005576^cellular_component^extracellular region`GO:0004252^molecular_function^serine-type endopeptidase activity`GO:0008236^molecular_function^serine-type peptidase activity`GO:0007586^biological_process^digestion	GO:0004252^molecular_function^serine-type endopeptidase activity`GO:0006508^biological_process^proteolysis	CCTCTCGATGCACCTACCTGCGTAAGTTCTCTCCTTGAGATCACTTGTTGACGTAACGTGCTCGCCAACGATGGCACCATTGGTGCAACGAAGACAGCTGCAGGAAGTATAAAGAGATGCTGAAGTCTAGCAATTGTGACACAAGATTCTGAAACAATGAAGTTAGCAGTGATCGTATTGAGCCTACTGGCTCCAGCTCTATCGGCGCCGAATTCTCACAAGCTGTGGTCCAGGAGACAGGACCGTATAATCGGGGGTACCGAAACCACCATAACGGAGTATCCCTGGCAGCTGTCTCTCCTCCTCGAGGTACAACGAAGGCGGCTTCAGGAAGTATAAAGACGTGCTGGTTTCCAGCATTTGTGATACATGCTTCTGAGATGATGCAGTTTTCAGTCG…	MMQFSVVVLCLLVPAFAAPSSLKLWARRQDRLVGGTDTTITEYPWQLSVIFEGSLRCGASIISSNWALTAAHCIDGLSASMLTVRAGSSYRNSGGTVLDVAQAIKNKLYYAINVDYDIAVLQPAEPFPLGSDVQPVNLPEAGYDPPSGLAVTVTGWGGYIL*
TR44831|c0_g1	2.54542	1.65068	10.1628	0.00716647	0.02615	0	0	0	0	0	0	0	0	0	0	0	ATTGTGTTCATGTTGCATAATCACTTTTGTTAAATAACTTCCATCTTTATTAAAATTTTTTGATTAAAATTTTTACAAAAATATCCATTTGCATGTGTGAACTTATCAACCCAACTTATATTTTTGTAACAATTGCAAACACAGAAAGTATGGTGATTCTGTAGATAAACTTCTCACTATAATAGGCACGATTTTCCTTTCCACCCAAGTTATGTCTCATATTTTGCTACGACAAATGGATAAGATCTAGTTGAAAGAGTAGATCGTTATAAGCGTGACAAAATGTGCAAAGACTCGTTTTTGGATGAAGTGAATTATAGTTCTTGGAATCATAACACGAAAAATATCACATTTATCAGATATTGTTTATAAACAGAGCATGTTCCTTTTTATGTAAGT…	0
TR86870|c1_g1	2.54497	3.61324	15.0509	0.00191303	0.0127282	MYRO1_BREBR^MYRO1_BREBR^Q:713-153,H:275-461^38.83%ID^E:3e-37^RecName: Full=Myrosinase 1 {ECO:0000303|PubMed:11804799};^Eukaryota; Metazoa; Ecdysozoa; Arthropoda; Hexapoda; Insecta; Pterygota; Neoptera; Paraneoptera; Hemiptera; Sternorrhyncha; Aphidomorpha; Aphidoidea; Aphididae; Macrosiphini; Brevicoryne	TR86870|c1_g1|m.16137	108-716[-]	MYRO1_BREBR^MYRO1_BREBR^Q:3-188,H:276-461^39.04%ID^E:1e-37^RecName: Full=Myrosinase 1 {ECO:0000303|PubMed:11804799};^Eukaryota; Metazoa; Ecdysozoa; Arthropoda; Hexapoda; Insecta; Pterygota; Neoptera; Paraneoptera; Hemiptera; Sternorrhyncha; Aphidomorpha; Aphidoidea; Aphididae; Macrosiphini; Brevicoryne	PF00232.18^Glyco_hydro_1^Glycosyl hydrolase family 1^9-188^E:1.1e-38	0	0	0	0	GO:0102799^molecular_function^glucosinolate glucohydrolase activity`GO:0046872^molecular_function^metal ion binding`GO:0019137^molecular_function^thioglucosidase activity`GO:0005975^biological_process^carbohydrate metabolic process	GO:0004553^molecular_function^hydrolase activity, hydrolyzing O-glycosyl compounds`GO:0005975^biological_process^carbohydrate metabolic process	TTTTTTTTTTTTTTTTTTTTTTTACAGGTTTTTAAAAGAATTTATTACAGTGTTAAGCAAAACAGAGTACAAAATTGACAGTATAAACACGGACCAGCTTATGAACATCATGTCGTTCGAGTGCTGTTGAAATACTCCAGGGGCACAGTCCTGGTCCTATAAATGTTGCCCATGAACTCTGACGATGCCTTCGGGCTTCTGGGTAGGTTTGGATCGTCAGTGTCCACTTTAAAAACTCCCCACCTTGGCCTGAAACCCTGACCCCACTCAAGATTGTCAATAATACTCCACGCCATGTACCCAATCACGTTACTTCCGTCAATATTGATTGCATTGAGTAGCTCCGCCAAGTAGTGGCCGTGGTAACTTATACGCTGGTCGTCCTGCGTTTCGCCCAGG…	ANSAAEGRPRSRLPTFTQQEIEYNRGTTDFIGINTYGTGLVTLGETGSIPSFAHDQGVIVSRDPSWVVGASGYVYMVPWGFRKLMNWVSNTYPQYPIIVTENGFSDLGETQDDQRISYHGHYLAELLNAINIDGSNVIGYMAWSIIDNLEWGQGFRPRWGVFKVDTDDPNLPRSPKASSEFMGNIYRTRTVPLEYFNSTRTT*
TR52696|c1_g15	2.53635	6.69303	15.702	0.00163585	0.0119262	PE1_ANOGA^PE1_ANOGA^Q:2492-2259,H:40-152^29.2%ID^E:4e-07^RecName: Full=Peritrophin-1;^Eukaryota; Metazoa; Ecdysozoa; Arthropoda; Hexapoda; Insecta; Pterygota; Neoptera; Holometabola; Diptera; Nematocera; Culicoidea; Culicidae; Anophelinae; Anopheles`PE1_ANOGA^PE1_ANOGA^Q:1214-1083,H:34-77^43.18%ID^E:6e-07^RecName: Full=Peritrophin-1;^Eukaryota; Metazoa; Ecdysozoa; Arthropoda; Hexapoda; Insecta; P…	TR52696|c1_g15|m.7159	337-921[-]	PBMU2_HUMAN^PBMU2_HUMAN^Q:51-189,H:100-238^43.17%ID^E:3e-09^RecName: Full=Protein PBMUCL2;^Eukaryota; Metazoa; Chordata; Craniata; Vertebrata; Euteleostomi; Mammalia; Eutheria; Euarchontoglires; Primates; Haplorrhini; Catarrhini; Hominidae; Homo`PBMU2_HUMAN^PBMU2_HUMAN^Q:62-194,H:100-232^43.61%ID^E:6e-09^RecName: Full=Protein PBMUCL2;^Eukaryota; Metazoa; Chordata; Craniata; Vertebrata; Euteleosto…	PF01607.24^CBM_14^Chitin binding Peritrophin-A domain^1-24^E:9.7e-06	0	0	0	KEGG:hsa:285834	GO:0005576^cellular_component^extracellular region	GO:0008061^molecular_function^chitin binding`GO:0006030^biological_process^chitin metabolic process`GO:0005576^cellular_component^extracellular region	GCATTGAAATGCAGTCCAGCTGGACAGTCCATAGTGACAGGTTTACCGTGATCACATTTGCAGAACTGACTGCAGTTTGAGGCATGAGGTAGATGCTTTGCTATTGAATTTTCATCTTCATATTGAGGGCAGACACCAACTGCTGGGCAATCTCCAGATGGGTCTGATGTCACTGGTGAGCTAGGTGCTGCTGTTGATGAAGAGCTTGGTGCAGCTGTGGTTGGTTGAGCTGTTGTGCTTGGTGCAGCTGTGGTAGTTTTGGCTGTAGTGCTTGGTTCAGCTGTAGTTGGCTGTACTGTTGTGGTTGGTGCAGCTGTGGTAGGTTCAGCTGGTGTGCTAGGTGCAGCTGTGGTAGGTTGTGGTTGGGGCAGCTGTGGTTGGCTGAACTGTTGTGGTTGG…	MDCPAGLHFNAVLEVCDWPQNAGCSGSSGTTSSPTSSTPSSSSAATTQAPTSAPSTTVIPTTAAPSTTVQPTTAAPTTTGQPTTVAPTTTIQPTTAAPSTTAKPTTAPPTTTVQPTTAAPTTTVQPTTIAPTTTVQPTTAAPTTTGQPTTVAPTTTIQPTTAAPSTTAKPTTAPPTTTVQPTTAAPTTTYHSCT*
TR52701|c3_g1	2.49913	1.61889	14.022	0.00247022	0.0143532	MYRO1_BREBR^MYRO1_BREBR^Q:1380-463,H:152-461^41.9%ID^E:1e-76^RecName: Full=Myrosinase 1 {ECO:0000303|PubMed:11804799};^Eukaryota; Metazoa; Ecdysozoa; Arthropoda; Hexapoda; Insecta; Pterygota; Neoptera; Paraneoptera; Hemiptera; Sternorrhyncha; Aphidomorpha; Aphidoidea; Aphididae; Macrosiphini; Brevicoryne	TR52701|c3_g1|m.7180	433-1296[-]	MYRO1_BREBR^MYRO1_BREBR^Q:3-278,H:182-461^40.35%ID^E:1e-64^RecName: Full=Myrosinase 1 {ECO:0000303|PubMed:11804799};^Eukaryota; Metazoa; Ecdysozoa; Arthropoda; Hexapoda; Insecta; Pterygota; Neoptera; Paraneoptera; Hemiptera; Sternorrhyncha; Aphidomorpha; Aphidoidea; Aphididae; Macrosiphini; Brevicoryne	PF00232.18^Glyco_hydro_1^Glycosyl hydrolase family 1^2-277^E:1e-59	0	0	0	0	GO:0102799^molecular_function^glucosinolate glucohydrolase activity`GO:0046872^molecular_function^metal ion binding`GO:0019137^molecular_function^thioglucosidase activity`GO:0005975^biological_process^carbohydrate metabolic process	GO:0004553^molecular_function^hydrolase activity, hydrolyzing O-glycosyl compounds`GO:0005975^biological_process^carbohydrate metabolic process	ACTTTATTTCTGTTTCAGATCAAAAACATGTAATTGTTTTCCACTCATTAAACAGGTGTAAGTTAGTAAGCAGAAAAAGATCTTCATAAAGAAAATCATGGACACATTAATTTCATTTATCTAATTTTACAATTTACAGATGTCTTTAATCAAAACACATAGCAAGTACAGCCTAGAAAAAGATATGTTAAAAACAGCGCATAAAAATGGTAAGGACAAATTGCGAATTTATCGGTAGCTATTCATTGTGACACAGATATCCGAAAAGCATTAACTGATTTGTGGAGTACGTCGTAATAATAACATCAATAATGAATACCAAAAGACGGGCGACTGGTAATAAATTAGGACATTTTACACATTAAAAGAAAAGTTTAGTAACTAGTATTTTATTTTTAC…	MPPGLPATGVGDYLATRTLVKAHARVWHLYDEQYRATQNGSVGMTFSSSQYEPYTNSTEDIEATERQRQFKVGIFAHPIYSQEGDYPVVVRERVDNNSKAEGLPRSRLPKFTQEEIEYIRGSADFFGLNTYGSQYIAAGDFPIAPSRRHDSGVIEKDDEIPLDQSAAGFRKILNWVVAEYPGYPIFVSENGLGNDGSVGLNDTDRIEYFSAFLPALLQAVNLDNVPVVGYTCWSLMDNLEWQLGYSKKYGLYQVDFDSPDRTRTPKESAYFMSTIYGTRQVPEKFFR*
TR71759|c0_g1	2.49094	3.33444	16.4254	0.00138086	0.0111786	DCOR_NEUCR^DCOR_NEUCR^Q:149-580,H:53-196^49.66%ID^E:2e-38^RecName: Full=Ornithine decarboxylase;^Eukaryota; Fungi; Dikarya; Ascomycota; Pezizomycotina; Sordariomycetes; Sordariomycetidae; Sordariales; Sordariaceae; Neurospora	TR71759|c0_g1|m.12487	140-580[+]	DCOR_NEUCR^DCOR_NEUCR^Q:4-147,H:53-196^49.66%ID^E:3e-39^RecName: Full=Ornithine decarboxylase;^Eukaryota; Fungi; Dikarya; Ascomycota; Pezizomycotina; Sordariomycetes; Sordariomycetidae; Sordariales; Sordariaceae; Neurospora	PF02784.16^Orn_Arg_deC_N^Pyridoxal-dependent decarboxylase, pyridoxal binding domain^42-146^E:1e-35	0	0	0	KEGG:ncr:NCU01271`KO:K01581	GO:0005737^cellular_component^cytoplasm`GO:0004586^molecular_function^ornithine decarboxylase activity`GO:0033387^biological_process^putrescine biosynthetic process from ornithine	GO:0003824^molecular_function^catalytic activity	CTGCCTTCAGTACAAACTGACTAAATCTGACTGAGGGCTGCCTCTTTGCTTATTCCAACCAGCTTTTCCTAAAATCGAGGACTGATCGGTCATACCTTCTCCCAAGTATCACCTACCACTGATTCAAACAACATCCATCATGCAGCTGGGTAAACTTGATGAACGTATTCACGTTATGGATGCCAGTTCAAACGTCTGGAGCATCATAAAGGACATCGCAGAGTCAGGAATTCAAGAGGAAGCATTCTATGTCTGTGACGTTGGTGACATCATAAACAAACACAAGGAATGGAAAATTAAATTGCCAAGGGTACAGCCTTATTATGCGGTGAAATGCAACGATAGCCTCACTGTGATTGAGGTGCTGGCTGCACTTGGAACTTGCTTCGATTGTGCCTC…	MQLGKLDERIHVMDASSNVWSIIKDIAESGIQEEAFYVCDVGDIINKHKEWKIKLPRVQPYYAVKCNDSLTVIEVLAALGTCFDCASKAEIDRVLSVGVDPSHIIFANPAKPSSHIRHAAAVGVDLMTFDSDCELHKIKSLFPAAKL
TR43732|c0_g2	2.48817	3.42754	13.1643	0.00308234	0.0160068	DCOR1_DROME^DCOR1_DROME^Q:1-657,H:102-319^49.77%ID^E:2e-71^RecName: Full=Ornithine decarboxylase 1;^Eukaryota; Metazoa; Ecdysozoa; Arthropoda; Hexapoda; Insecta; Pterygota; Neoptera; Holometabola; Diptera; Brachycera; Muscomorpha; Ephydroidea; Drosophilidae; Drosophila; Sophophora	TR43732|c0_g2|m.4865	1-657[+]	DCOR1_DROME^DCOR1_DROME^Q:1-219,H:102-319^49.77%ID^E:2e-71^RecName: Full=Ornithine decarboxylase 1;^Eukaryota; Metazoa; Ecdysozoa; Arthropoda; Hexapoda; Insecta; Pterygota; Neoptera; Holometabola; Diptera; Brachycera; Muscomorpha; Ephydroidea; Drosophilidae; Drosophila; Sophophora	PF02784.16^Orn_Arg_deC_N^Pyridoxal-dependent decarboxylase, pyridoxal binding domain^1-171^E:4.4e-50	0	0	COG0019^Specifically catalyzes the decarboxylation of meso- diaminopimelate (meso-DAP) to L-lysine (By similarity)	KEGG:dme:Dmel_CG8721`KO:K01581	GO:0005737^cellular_component^cytoplasm`GO:0004586^molecular_function^ornithine decarboxylase activity`GO:0033387^biological_process^putrescine biosynthetic process from ornithine	GO:0003824^molecular_function^catalytic activity	ATTTTCGCAAACCCTGCAAAACCATCATCTCACATTCGCCATGCAGCAGCTGTAGGTGTTGATCTGATGACTTTCGACAGTGATTGTGAGCTCCACAAAATAAAGAGCCTATTTCCTGCTGCCAAGCTGGTGCTACGTATCCGGTATGACGCTGCCGTTGCTCAGTGCCAGCTTGGGAATAAGTTTGGCTGTGACCCAGAATCAGATGCACCACGCCTGATGGAATTGGCTCACTCGTTGGGTCTAGACATTGTGGGCATCAGTTTCCACGTCGGCTCTGGCTGTGACGATCCACCAGTATTCTACAAAGCTATTTCTGCTGCTCGAAGACTTTTTGATCTGGGGTCTGCTCTCGGGTTCTCCATGAGTTTGCTTGATCTTGGTGGTGGCTATCCTGGC…	IFANPAKPSSHIRHAAAVGVDLMTFDSDCELHKIKSLFPAAKLVLRIRYDAAVAQCQLGNKFGCDPESDAPRLMELAHSLGLDIVGISFHVGSGCDDPPVFYKAISAARRLFDLGSALGFSMSLLDLGGGYPGNKGAHLDKIAEVVNSALGDFFPEPDVHIIAEPGRYYVASAYTLATNVHSKRELINPNDGSITSVMYYVNDGLYGSFNCILYDHMKV
TR85673|c0_g2	2.47328	1.1629	29.9531	0.000108648	0.00694482	0	0	0	0	0	0	0	0	0	0	0	ATGGGGGCATCAGTATTTTTTTGCTGAGAACAGACGATACTCACAGGCCGTCATCATGATAAGACAAGCGGTGTGTCTCCTGCTGCTAGCAGGATGTGCTGTCGCATACCCAGAGGTGACGATGCTGTTCCGGGACCATAAGGTGTACCAGGCCGAGGTGAGGTGCTGCGACGGCATCTTCAACACGCCACACTACTACAGGCGCGTGTTCAACGTGAGCGCGCTCTACCTGAGCTCGCACGTGCGTCGCGCCGGCACCGGCGTGATGCTCCCCGAGCAGCAGGACGTGTTCAATTTGTACATTGTCGGTATGGACTACGAATATGTTGATGTCTGAGCGAAAAAGTAGCAATGTGTTTCCAAAGAGTTTCCGTTATGCTATTGATGACAAATGTAAGC…	0
TR83044|c0_g1	2.46729	2.28392	13.5492	0.00278811	0.0152844	MYRO1_BREBR^MYRO1_BREBR^Q:186-4,H:1-61^59.02%ID^E:6e-20^RecName: Full=Myrosinase 1 {ECO:0000303|PubMed:11804799};^Eukaryota; Metazoa; Ecdysozoa; Arthropoda; Hexapoda; Insecta; Pterygota; Neoptera; Paraneoptera; Hemiptera; Sternorrhyncha; Aphidomorpha; Aphidoidea; Aphididae; Macrosiphini; Brevicoryne	0	0	0	0	0	0	0	0	GO:0102799^molecular_function^glucosinolate glucohydrolase activity`GO:0046872^molecular_function^metal ion binding`GO:0019137^molecular_function^thioglucosidase activity`GO:0005975^biological_process^carbohydrate metabolic process	0	GGGGTACTTGTGGTACGAGTCGCAGGCCACATCGCCGTTCTGGCCGTTCCAGCCCCAGTCGGGGTGCTCGTGCAGCATGTGGTCCCAGATGCTCTCGCCCTTGCCATCCTCGTTCCAGGCGCCCTCCACTTGGTAGGCGGCCGTGGCGTAGCCCAGCATGAAGCCGTCTGGGAAGCGGTTGTTGATCTCCTGAGCGGAGGCCGAAGCCGCCGCCAGCACCACCAACAAGCACAGCGACAACATCTCGGACCACAGCCAACAGCAGCGCTTTCCACAACATGATGGCTGTCCGG	0
TR98067|c0_g2	2.46085	4.70451	14.9096	0.00198019	0.0129471	0	TR98067|c0_g2|m.19198	2-379[-]	PE1_ANOGA^PE1_ANOGA^Q:4-126,H:36-131^29.03%ID^E:9e-06^RecName: Full=Peritrophin-1;^Eukaryota; Metazoa; Ecdysozoa; Arthropoda; Hexapoda; Insecta; Pterygota; Neoptera; Holometabola; Diptera; Nematocera; Culicoidea; Culicidae; Anophelinae; Anopheles	PF01607.24^CBM_14^Chitin binding Peritrophin-A domain^2-46^E:1.3e-09	0	0	0	KEGG:aga:AgaP_AGAP006795	GO:0005576^cellular_component^extracellular region`GO:0008061^molecular_function^chitin binding`GO:0006030^biological_process^chitin metabolic process	GO:0008061^molecular_function^chitin binding`GO:0006030^biological_process^chitin metabolic process`GO:0005576^cellular_component^extracellular region	CTGGGCATGGAATAAGCCTGGCAACGCCGTTCTCGTCACACTTGTAGAAGCTGCTGCAGTCCTTTGGATTCGGAAGCTGGGTGACGTCATCCGGATTCCATGCTGGACAAGTGGGGACGTCGTCAGATGGTGGTGCAGGTGAAATTACACTATCGTTTGAGCCACCTCCAGTTTCACTGCCGTCGCCTGATCCTCCACCAGTTCCATTGTCGTCGTCAGCAGGAGGAGACGAGGATGAGGAGCAGCCAGCTCGGTCTGGGAAGTCGCACACCCTCAGCTTTGGATTGAACTCGAGGTTTGCTGGACATGGGATGACCGTTGCAACACCTGATGGCTCACACTGTAGGAAGCTCCTGCAGCTGCTGGGGTTCGGAAATGG	PFPNPSSCRSFLQCEPSGVATVIPCPANLEFNPKLRVCDFPDRAGCSSSSSPPADDDNGTGGGSGDGSETGGGSNDSVISPAPPSDDVPTCPAWNPDDVTQLPNPKDCSSFYKCDENGVARLIPCP
TR73230|c0_g1	2.45233	5.50785	14.8811	0.00199407	0.0130055	DCOR1_XENLA^DCOR1_XENLA^Q:1609-1160,H:284-441^47.53%ID^E:1e-38^RecName: Full=Ornithine decarboxylase 1;^Eukaryota; Metazoa; Chordata; Craniata; Vertebrata; Euteleostomi; Amphibia; Batrachia; Anura; Pipoidea; Pipidae; Xenopodinae; Xenopus; Xenopus	TR73230|c0_g1|m.13035	1010-1609[-]	DCOR1_XENLA^DCOR1_XENLA^Q:1-150,H:284-441^47.53%ID^E:6e-42^RecName: Full=Ornithine decarboxylase 1;^Eukaryota; Metazoa; Chordata; Craniata; Vertebrata; Euteleostomi; Amphibia; Batrachia; Anura; Pipoidea; Pipidae; Xenopodinae; Xenopus; Xenopus	PF00278.22^Orn_DAP_Arg_deC^Pyridoxal-dependent decarboxylase, C-terminal sheet domain^2-95^E:2.3e-18	0	0	0	0	GO:0005737^cellular_component^cytoplasm`GO:0004586^molecular_function^ornithine decarboxylase activity`GO:0033387^biological_process^putrescine biosynthetic process from ornithine	GO:0003824^molecular_function^catalytic activity	TTTTTTTTTTATTTTAAACAATATTATTTATTATATAAGATTGTATACAAAAAAAATAACAAATTCAAGTGAAAACATATTTCTAAGACAAAATTTTCAGCACTTCACAGTGCTGGTCATGGTGGCCTTTTCTCTAATAAAAGCTTTCGAAAAGACTGTCTCTAAATAAACTACCACTAAAGTAACAAATATACATGGAGTTGTTTCATTCCTCTGCATACAAGTTTTACGTGTGAACTGTTTCATTTAATTGAAATTATTATATATTCTACCATAACAAGTTAGCATTTGACATGCATCGTATCATACACCTCAGTATTAAATTTTTATTTATTTTTTCTGGTTCCAATAATGCATCTGCTGTTAATGTGCTGAGTATATAAATACATTAGTCTCTGG…	YTLATNVHSKRELINPNDGSITSVMYYVNDGLYGSFNCILYDHMKVTPVPLKAPGPKMRPCSVWGPTCDGLDQIVESTLLPELDVGDWLIFENMGAYTLPVASPFNGFPVPKVHTVIDAQGWLLLKDRLPMTEEHFVIGNIPANLHLGLSIDGKGNIDEWDEVHMPVSSSDDEVVDDHMSHSTVGSSIIYPLLQMGHVN*
TR34085|c0_g2	2.44415	2.44999	27.6367	0.00015723	0.00694482	0	0	0	0	0	0	0	0	0	0	0	AAGTAAGTTTTGCTGAGACACTGATCACAGCCGAGCTCTCAGTGGTAATGAAAGTTTTCACAGGCTTAGCGGTGCTCTTGGTTTTGGCGGCAGCGGCTCTGGGTGCCCACCAGCAGTCACTGGCTGACCCGCCAGTATGTCCTGAGCGGATCCCGGGCGTGACACTCAACATTACCTTCTACCCAAATGAAGACGACTGCACCAAGTACTGGGAGTGTGACAACGGAAACCTTTACAACGGCTCGTGTACTGATGGC	0
TR60226|c0_g1	2.42994	5.47496	33.1268	6.76285e-05	0.00694482	MYORG_HUMAN^MYORG_HUMAN^Q:760-1323,H:156-353^27.5%ID^E:4e-26^RecName: Full=Myogenesis-regulating glycosidase {ECO:0000312|HGNC:HGNC:19918};^Eukaryota; Metazoa; Chordata; Craniata; Vertebrata; Euteleostomi; Mammalia; Eutheria; Euarchontoglires; Primates; Haplorrhini; Catarrhini; Hominidae; Homo`MYORG_HUMAN^MYORG_HUMAN^Q:1320-1562,H:386-467^36.14%ID^E:4e-26^RecName: Full=Myogenesis-regulating glyco…	TR60226|c0_g1|m.9556	3-482[+]	MYORG_MOUSE^MYORG_MOUSE^Q:20-91,H:282-353^36.11%ID^E:3e-10^RecName: Full=Myogenesis-regulating glycosidase;^Eukaryota; Metazoa; Chordata; Craniata; Vertebrata; Euteleostomi; Mammalia; Eutheria; Euarchontoglires; Glires; Rodentia; Myomorpha; Muroidea; Muridae; Murinae; Mus; Mus	0	0	0	COG1501^hydrolase, family 31	KEGG:mmu:329828	GO:0005789^cellular_component^endoplasmic reticulum membrane`GO:0016021^cellular_component^integral component of membrane`GO:0031965^cellular_component^nuclear membrane`GO:0004553^molecular_function^hydrolase activity, hydrolyzing O-glycosyl compounds`GO:0005975^biological_process^carbohydrate metabolic process`GO:0043568^biological_process^positive regulation of insulin-like growth factor recept…	0	CTTCCAAGAACAAGGCACCTTACCCAGTTGATCGTTCAGAGAGTGTGATGGAGATGACAATCTGCAAATACGAAAATGCAAGGGTAGCACACGAAGAGGCCATCAAAGAATACTTCGATAAACCCCTAGGCATTCCAGATGAGCGCATGACCACGCATCCCATATGGTCGACGTGGGCGCGTTACAAGAGAGACATCAACGACACGACAGTGAGGCAGTTCGCCAACGAGATAGTCGAACACGGCTTCAGCAACAGCCAGATTGAGATAGACGAACGCTGTGGGTGCACCCATTCATCAACTCTGACTGCGAACCGCATTACTCGAGGGCGCTTGAGAAAGGCTGGTTCGTCAGAGACTCCGAGGGGAGCACCAACACCAGCTGGTGGAACGGTGAGGG…	SKNKAPYPVDRSESVMEMTICKYENARVAHEEAIKEYFDKPLGIPDERMTTHPIWSTWARYKRDINDTTVRQFANEIVEHGFSNSQIEIDERCGCTHSSTLTANRITRGRLRKAGSSETPRGAPTPAGGTVRAASSTLTTLQLKANGRACTGNLRVRRE*
TR89441|c0_g1	2.41848	1.12438	14.3119	0.00229612	0.0139071	0	TR89441|c0_g1|m.16778	1-312[-]	UDPE_NPVCD^UDPE_NPVCD^Q:9-58,H:5-54^48%ID^E:1e-05^RecName: Full=Ecdysteroid UDP-glucosyltransferase;^Viruses; Baculoviridae; Alphabaculovirus	0	sigP:1^21^0.955^YES	ExpAA=24.80^PredHel=1^Topology=i7-29o	0	KEGG:vg:2943836	GO:0016758^molecular_function^transferase activity, transferring hexosyl groups	0	GCCCAGTTCGTGGTATGCCTCGGCCAATTTCATAGGCCAAGTATCTGCCCAGACAGATTTGTTCTGGTTGCTCAGAACCCAATAAACTGATGATAAGTCTACCAGTGTGTAATTCTTATTCTCGGTCTGCATGGGGTCCGGCGTGATGTGCGTGACGCGGTGCCCCCTGGCCAGCAGAGCGCCGATCACGGCGTTGATGGGCAGCGCGTGGCTGACAGATGGCGTCGGCGCGATGAACAAGATGTCCGCCGACCAGCAGCCGCCCACTGCCAGCAGCAACAGCAGCAGCGCAGACCACGGGCAGGAACTCATCTCGCCTCTAAATCGCCGCTAGACGCCGGCGGCCGACTGCAGCGTGGCCGCCCTCTGCTTGT	MSSCPWSALLLLLLAVGGCWSADILFIAPTPSVSHALPINAVIGALLARGHRVTHITPDPMQTENKNYTLVDLSSVYWVLSNQNKSVWADTWPMKLAEAYHELG
TR85848|c0_g1	2.38636	1.79384	16.5275	0.00134873	0.011048	ZN235_HUMAN^ZN235_HUMAN^Q:434-3,H:485-642^30.38%ID^E:1e-06^RecName: Full=Zinc finger protein 235;^Eukaryota; Metazoa; Chordata; Craniata; Vertebrata; Euteleostomi; Mammalia; Eutheria; Euarchontoglires; Primates; Haplorrhini; Catarrhini; Hominidae; Homo	TR85848|c0_g1|m.15952	3-488[-]	ZN235_HUMAN^ZN235_HUMAN^Q:19-162,H:485-642^30.38%ID^E:1e-06^RecName: Full=Zinc finger protein 235;^Eukaryota; Metazoa; Chordata; Craniata; Vertebrata; Euteleostomi; Mammalia; Eutheria; Euarchontoglires; Primates; Haplorrhini; Catarrhini; Hominidae; Homo	PF13912.6^zf-C2H2_6^C2H2-type zinc finger^146-156^E:0.02	0	0	COG5048^Zinc finger protein	KEGG:hsa:9310`KO:K09228	GO:0005634^cellular_component^nucleus`GO:0003677^molecular_function^DNA binding`GO:0003700^molecular_function^DNA-binding transcription factor activity`GO:0046872^molecular_function^metal ion binding`GO:0006357^biological_process^regulation of transcription by RNA polymerase II	0	TTGAGCTTACTAGACTTAATAAAGGATTTCCCACAAGTATCACATTTGTGTACAGTTCGACTAGTACGTTTTACAGCTCGTTTCTTGAGATGATCTGATTGAGTAATTGGTATCTCATGATTATCAGATGATTGTAGGTTGAGGTTACCTGCTGTAGAAACGGATTTGTCAGAAGAAACAAATTTGTGTGATGTCTCAGCATTACACATTATTTCATGAGAATGGGTGTTACGAAATACATTAGTGATTCTGTCGCACAGAAATCCCTTTTCATTAAGTTCTGGCGCCTTCACGGAATGCGTGATTGAGCTACCATTATTGGAGAATACCTCACCACACCTTGTACAGATATGTGGAGTTGGATGAACCCCGTCAGCGTCAAGCTTATGTTCAGATGAA…	RDSTFCIRNNCGLKEKEFKDFTCSSCQQTFSSEHKLDADGVHPTPHICTRCGEVFSNNGSSITHSVKAPELNEKGFLCDRITNVFRNTHSHEIMCNAETSHKFVSSDKSVSTAGNLNLQSSDNHEIPITQSDHLKKRAVKRTSRTVHKCDTCGKSFIKSSKL
TR95462|c0_g1	2.3665	2.41142	13.5174	0.00281115	0.0153292	EST1_SCHGA^EST1_SCHGA^Q:144-413,H:27-118^44.57%ID^E:2e-16^RecName: Full=Esterase SG1;^Eukaryota; Metazoa; Ecdysozoa; Arthropoda; Hexapoda; Insecta; Pterygota; Neoptera; Paraneoptera; Hemiptera; Sternorrhyncha; Aphidomorpha; Aphidoidea; Aphididae; Aphidini; Schizaphis	TR95462|c0_g1|m.18675	3-425[+]	EST1_SCHGA^EST1_SCHGA^Q:48-137,H:27-118^44.57%ID^E:1e-16^RecName: Full=Esterase SG1;^Eukaryota; Metazoa; Ecdysozoa; Arthropoda; Hexapoda; Insecta; Pterygota; Neoptera; Paraneoptera; Hemiptera; Sternorrhyncha; Aphidomorpha; Aphidoidea; Aphididae; Aphidini; Schizaphis	PF00135.28^COesterase^Carboxylesterase family^47-133^E:3.1e-26	0	ExpAA=18.01^PredHel=1^Topology=o15-33i	0	0	GO:0080030^molecular_function^methyl indole-3-acetate esterase activity	0	CTCTCTCCAGCAGCATGGAGTCCGGGCGTCGGCGAACCATTCGGACCCTGATACCGCTGGTGCAACTATTGTTCGCCGCGGCGCTTAATTTCCTGTTTGTAGAAGACGCCGCAGCCAAAACACATGTGAGCAGACACTTGGCGGTGCACGTGGAGGAGGGCTGGGTTCGAGGCCGCTACCAGCACACGGTGTACGGCTACCCCTACGTCAGTTTCAGCGGCATCCCCTATGCTGAGCCGCCGGTCGGCTCGCTCAGATACAAGGCTCCAGTACCAAAAGCCAGTTGGAATGGCGAGCTCGACGCGACCGTTGAAGGATCTCCATGCCCCCAGGTGAATGACTCCGGTGTATACCTTGGCAAGGAAGATTGCCTTTATCTCAACGTGTATGTTCCACATG…	LSSSMESGRRRTIRTLIPLVQLLFAAALNFLFVEDAAAKTHVSRHLAVHVEEGWVRGRYQHTVYGYPYVSFSGIPYAEPPVGSLRYKAPVPKASWNGELDATVEGSPCPQVNDSGVYLGKEDCLYLNVYVPHAMRRTFGSR
TR74769|c0_g1	2.33166	1.14994	13.8984	0.00254907	0.0145407	0	0	0	0	0	0	0	0	0	0	0	AACGCCGCCCCCAGCGCCGCCAGCGAGCCCGCCCACGACTCCTCCTCAGAGGTCCACAGGCCCAGCTTCTCCAGCGCCGGCGACGACCAGCTCATCACCATGCCGCTCATCATAGCCGCCAGGTTGCCGGCCAGTGCGGCAGCATACTGCTTGGTGACGCCGCTGGCGACCATGGTGGTTGGTGGCTGGTGGTTGGTGGTTGGTGGCTGCGCTCGCTTCCGCGAGGTGTCCCGGCG	0
TR73028|c0_g1	2.32959	7.64309	17.4087	0.00110457	0.0102997	FAS_HUMAN^FAS_HUMAN^Q:331-7410,H:2-2487^49.02%ID^E:0^RecName: Full=Fatty acid synthase;^Eukaryota; Metazoa; Chordata; Craniata; Vertebrata; Euteleostomi; Mammalia; Eutheria; Euarchontoglires; Primates; Haplorrhini; Catarrhini; Hominidae; Homo	TR73028|c0_g1|m.12811	226-7461[+]	FAS_HUMAN^FAS_HUMAN^Q:36-2395,H:2-2487^49.06%ID^E:0^RecName: Full=Fatty acid synthase;^Eukaryota; Metazoa; Chordata; Craniata; Vertebrata; Euteleostomi; Mammalia; Eutheria; Euarchontoglires; Primates; Haplorrhini; Catarrhini; Hominidae; Homo	PF00109.26^ketoacyl-synt^Beta-ketoacyl synthase, N-terminal domain^36-273^E:1.3e-67`PF02801.22^Ketoacyl-synt_C^Beta-ketoacyl synthase, C-terminal domain^277-393^E:1.6e-40`PF16197.5^KAsynt_C_assoc^Ketoacyl-synthetase C-terminal extension^396-505^E:1.3e-39`PF00698.21^Acyl_transf_1^Acyl transferase domain^526-840^E:2.3e-82`PF14765.6^PS-DH^Polyketide synthase dehydratase^889-1092^E:4.2e-17`PF00107.26…	0	0	COG3321^synthase	KEGG:hsa:2194`KO:K00665	GO:0005829^cellular_component^cytosol`GO:0070062^cellular_component^extracellular exosome`GO:0042587^cellular_component^glycogen granule`GO:0005794^cellular_component^Golgi apparatus`GO:0042470^cellular_component^melanosome`GO:0016020^cellular_component^membrane`GO:0005886^cellular_component^plasma membrane`GO:0008659^molecular_function^(3R)-hydroxymyristoyl-[acyl-carrier-protein] dehydratase act…	GO:0055114^biological_process^oxidation-reduction process`GO:0016788^molecular_function^hydrolase activity, acting on ester bonds`GO:0009058^biological_process^biosynthetic process	AATTTTTATATTCAAAATCAGCGTACTGTGAATATGACTTCTTCACTCTACACTGAATATATATTTGTTCTATGCAGGAATTCCTGTTCATATGTACCGGTGACTGTGTCTGGTGCGGTGGCTACACAGGGGAAGACTTGCCATCGCTTAACTACACAAGGAAGAAGCTTCCTCGAATTAACCAAGGCAAACAGCGTTCGCGATTAACTAAGGAAAACAGAAAACATGCCAGCCCGTTTCCCAGAAGTTGAAGTGCATGCTCCGGTAGGAGTGAGAACAGTTGACACATCTACAGTAAATTCCGTGCCCAACGGTCACTGGAACATGGATGATGACATAGTTATTACTGGTATCTCAGGAAGGTTACCAGAAAGTTCCAACATAGAAGAATTTAAGCAA…	MPARFPEVEVHAPVGVRTVDTSTVNSVPNGHWNMDDDIVITGISGRLPESSNIEEFKQQLFEGVDLVTDDERRWPSGLYGLPTRTGKLKDLAHFDATFFGVHAKQAHVMDPQLRMLLELTHEAIVDAGVNPVDVRGSRTGVFIGVSDSESDEYWTADPEKVNGYGLTGCCRAMFPNRISYTFDFSGPSYAIDTACSSSMFALQQAMNAMRTGQCDAAIVGGVNLLLKPTCSLQFHRLSMLSPQGMCKAFDASGNGYVRSEAAVVIYLQKSSQAKRVYATIVNAKTNTDGYKTQGITFPSGEMQKKLVKEVYAEVGLNPSDVSYVEAHGTGTKVGDPQEVNAIADVFCKDRNSPLLIGSVKSNMGHSEPASGLCSIAKVVIAMEAGFLPANLHFKEPNPD…
TR89657|c0_g5	2.32345	0.571927	30.9741	9.29214e-05	0.00694482	RBP1_DROME^RBP1_DROME^Q:439-681,H:1-81^79.01%ID^E:4e-40^RecName: Full=RNA-binding protein 1;^Eukaryota; Metazoa; Ecdysozoa; Arthropoda; Hexapoda; Insecta; Pterygota; Neoptera; Holometabola; Diptera; Brachycera; Muscomorpha; Ephydroidea; Drosophilidae; Drosophila; Sophophora	TR89657|c0_g5|m.16930	439-828[+]	RBP1_DROME^RBP1_DROME^Q:1-81,H:1-81^79.01%ID^E:2e-43^RecName: Full=RNA-binding protein 1;^Eukaryota; Metazoa; Ecdysozoa; Arthropoda; Hexapoda; Insecta; Pterygota; Neoptera; Holometabola; Diptera; Brachycera; Muscomorpha; Ephydroidea; Drosophilidae; Drosophila; Sophophora	PF00076.22^RRM_1^RNA recognition motif. (a.k.a. RRM, RBD, or RNP domain)^13-77^E:3.5e-19`PF13893.6^RRM_5^RNA recognition motif. (a.k.a. RRM, RBD, or RNP domain)^29-86^E:8.2e-05	0	0	ENOG4111N8Y^serine arginine-rich splicing factor	KEGG:dme:Dmel_CG17136	GO:0016607^cellular_component^nuclear speck`GO:0005634^cellular_component^nucleus`GO:0035327^cellular_component^transcriptionally active chromatin`GO:0003729^molecular_function^mRNA binding`GO:0003723^molecular_function^RNA binding`GO:0045292^biological_process^mRNA cis splicing, via spliceosome`GO:0000381^biological_process^regulation of alternative mRNA splicing, via spliceosome`GO:0010468^biol…	GO:0003676^molecular_function^nucleic acid binding	TTAGCTAACAATCTGATTTATGAATTACCTGCATGGATTACGCAATGACTGGAATGGAAGGAAACCCGAATGTATTGGCCTATGTACTTAACCTTTCCCTGTTACCGGTTGCTCGCCACCCCATGTATTTTCACCCCTAAGTCTCAGACTGAAAATTCTAGAAATGAATGTAACTGAAGAAAAAGTCTTTGACTTTTATCACTTCGGCCTTCCTTGTTATCGGAAGTTAGTCAGAAACGTGAATTAACTTGTACTGATGGTGTGCGAAAATCTAGTGACTTAAAACTGAAGATTTGATGATTTTTAGTATTTTATCATAAACTCGAATCCATTTGAAGCCCAGTATTTCAGTCTCAGGCAACCACATACATCATACAAGCACATATCAATACATAGAGA…	MSRYREWDLSCKVYVGNLGSNTSKYELETAFSKFGPLKDVWVARNPPGFAFIEFADPRDAEDAVRALDGTRLCGTRVRVEMSTGRSREGGRRSWRSRSRSPRRRSYSRSRSRSRSPRRSRSRSLSRDRY*
TR99717|c1_g8	2.31588	1.50373	13.1351	0.0031061	0.0160848	0	0	0	0	0	0	0	0	0	0	0	CTCCCTCTCATTCCTTAAATAACTTTAGGACTAAACTTTTGTATCCAAACACTATTCCTTACCTCATCAACATTTCCTCTTGGTACTTCAATGTGCAGCAACTATTCTCCACTGCAAGTCTGCCTTCAGCATATACTAATGATAACGCACTGCTTTGCTTCTTCACCGCATAAAAAATAGTAAATGGACCCGGTTCAAGAAAAGCACCAAACTATGAAATACAACTTCCCAACAAGCTTCGAAAACTCTTAGCTCTGCTCTCTCAAAT	0
TR83533|c0_g1	2.30875	1.40853	12.3387	0.00384393	0.0181044	TRET1_POLVA^TRET1_POLVA^Q:1363-836,H:313-489^34.46%ID^E:8e-30^RecName: Full=Facilitated trehalose transporter Tret1 {ECO:0000303|PubMed:17606922, ECO:0000312|EMBL:BAF63703.1};^Eukaryota; Metazoa; Ecdysozoa; Arthropoda; Hexapoda; Insecta; Pterygota; Neoptera; Holometabola; Diptera; Nematocera; Chironomoidea; Chironomidae; Chironominae; Polypedilum; Polypedilum	TR83533|c0_g1|m.15380	794-1366[-]	TRET1_AEDAE^TRET1_AEDAE^Q:2-174,H:615-788^33.33%ID^E:1e-33^RecName: Full=Facilitated trehalose transporter Tret1 {ECO:0000250|UniProtKB:Q7PIR5};^Eukaryota; Metazoa; Ecdysozoa; Arthropoda; Hexapoda; Insecta; Pterygota; Neoptera; Holometabola; Diptera; Nematocera; Culicoidea; Culicidae; Culicinae; Aedini; Aedes; Stegomyia	PF00083.24^Sugar_tr^Sugar (and other) transporter^9-172^E:4.4e-39	0	ExpAA=107.21^PredHel=5^Topology=o10-30i37-59o69-91i104-126o136-158i	ENOG410XNQK^Transporter	0	GO:0016021^cellular_component^integral component of membrane`GO:0005886^cellular_component^plasma membrane`GO:0015574^molecular_function^trehalose transmembrane transporter activity`GO:0015771^biological_process^trehalose transport	GO:0022857^molecular_function^transmembrane transporter activity`GO:0055085^biological_process^transmembrane transport`GO:0016021^cellular_component^integral component of membrane	GGCCGTAGGACCGTCTGTAATTTTCAGCTATACAATTAGAGTGATATATACAGACATATAAGCTTATGTATTTACACAGTAACATTTACAAGGAATTGTAGTACAATGGGGCGCAGTGTACATATTTAGATCTTATAGTATGTCTTAATACTGGTCATTTATAAAATATAATTACAAAAGATCACAATTAACCATTGTTTACGTTTAACGTACTTACAAAATTCTATCCCTTTGACACATCAGAAACTGACTGTGGCAGGAAGAAACGAGCATGCATTACGTGACGATTTTGCATACGTTAAATAATAATGTAGACACTCACATCAAGTAGGAGCGCAATTTGTCTTCACGAAGTGCAAAACGTATTGCTTTAGATCTATAGCATTTTGAACAACAGTA…	AAGGSVSDIVAPMIINGTMLVESCFAPFLVDRVGRRPLLLFSSIGMCLALIPLGVFFVLSDAKQNVESIGWIPVTALIFYIVVYTPGYGCLPFTVSGEVFPPNVKIVAMPMAACVSWFMSFIVTRFYEDIALAVGNAGPFFVFAGCALLVTIYVYFVVPETKGKTLEEIQQMLGEEKGGPVGSVLPAIGS*
TR43810|c0_g1	2.30025	1.34774	17.8478	0.00100225	0.00997637	0	0	0	0	0	0	0	0	0	0	0	AAAAGACCCACTTTCATCACCAGTGGCAATCTACGAAAGAAGGTCTGGAGCATCTTGAAGCAGTTTCTTAGGTTCTTTGCAGACTTTCTCGCATTATCCTTCTGATCGTCTTGAAGCAGTTGTGGCACAAATTTCTTCGCAATACTTCTCACGTTCAACTTTTCTCATACAATACGTTAACGTATACCATAACGTATTCCCAAGGTGTTAGAGAGGTCTTGACAGCCTGTCTACGAACTTGCAGAATCAGATCCTCCGTTTGCCGAACGTTTCCTGGAGTGATACCAGTTGACTGCCGACTGGAAAAGTCCTCGTTATCACTAGACGTTCGCCTATTTTGAAAAGCCTATACCAGTCGTAAGTCTGTGTCTTGCCAAAGCGTTGTCTCCAAGTGCTTGC…	0
TR100696|c1_g4	2.29988	5.66178	34.3102	5.71595e-05	0.00694482	PE1_ANOGA^PE1_ANOGA^Q:1649-1314,H:32-151^30.83%ID^E:1e-08^RecName: Full=Peritrophin-1;^Eukaryota; Metazoa; Ecdysozoa; Arthropoda; Hexapoda; Insecta; Pterygota; Neoptera; Holometabola; Diptera; Nematocera; Culicoidea; Culicidae; Anophelinae; Anopheles`PE1_ANOGA^PE1_ANOGA^Q:1451-1128,H:32-151^29.51%ID^E:8e-07^RecName: Full=Peritrophin-1;^Eukaryota; Metazoa; Ecdysozoa; Arthropoda; Hexapoda; Insecta;…	TR100696|c1_g4|m.133	89-514[-]	0	PF01607.24^CBM_14^Chitin binding Peritrophin-A domain^4-49^E:1.2e-12	0	ExpAA=20.88^PredHel=1^Topology=o86-108i	0	0	0	GO:0008061^molecular_function^chitin binding`GO:0006030^biological_process^chitin metabolic process`GO:0005576^cellular_component^extracellular region	CCATCAGTACATGAGCCATTGTAAAGGTTTCCATTGTCACACTCCCAGTACTTGGTGCAGTCATCTTCATTAGGGTAGAAGGTAATGTTCATTGCCACACCTGGAATTCGTTCTGGACATACTGGTGGGTCTGCGCGAGACTGCAGTTGGGGAACCTCAGCCGGCAGCAGACTTTGCTCCTTGTTATCGTAAGGACAGTCGTAATTGTATGGCCAGTCACAAGAGTCCACATTGGGATTCCACACCAAACCATCAGTACATGAGCCATTGTAAAGGTTTCCATTGTCACACTCCCAGTACTTGGTGCAGTCATCTTCATTAGGGTAGAAGGTAATGGCAGCAGACTTTGCTCCTTGTTATCGTAAGGACAGTCGTAATTGTATGGCCAGTCACAAGAGT…	MNITFYPNEDDCTKYWECDNGNLYNGSCTDGLVWNPNVDSCDWPYNYDCPYDNKEQSLLPLPSTLMKMTAPSTGSVTMETFTMAHVLMVWCGIPMWTLVTGHTITTVLTITRSKVCCRLRFPNCSLAQTHQYVQNEFQVWQ*
TR68297|c0_g1	2.2969	3.5367	10.9189	0.00573004	0.0228124	0	TR68297|c0_g1|m.11433	2-556[-]	0	PF01607.24^CBM_14^Chitin binding Peritrophin-A domain^39-83^E:8.5e-12	sigP:1^22^0.92^YES	ExpAA=16.74^PredHel=1^Topology=i7-26o	0	0	0	GO:0008061^molecular_function^chitin binding`GO:0006030^biological_process^chitin metabolic process`GO:0005576^cellular_component^extracellular region	GTCCAGCAGGGCAGTCCATAGTGACAGGTTTACCATGATCACATTTGCAGAACTGACTGCAGTTTGTAGCATGTGGAAGATGCTTAGCAATCGAGTTTTCATCCTCATATTGTGGACATGTGCCGACCGCTGGACATGCTTCCGCTGGTCTAGATGGTGACGACGTGACAGGTGCATCGGTTTGCGGTTTATCAGTTGAAGTTGATGCAGACGTGGATCCAGCAGTTGGAGCTGCAGTTGGCGCTGCAGTAGAACTAGCGCCTGTATTCGCAGTGCACCCAGCAGAACTAGCTCCTGTATTCGCAGTGCACCCAGCTACATCTGGCCAGTCACATACCTCTAGTACTGCATTAAAATGAAGTTCGTCGGGACACACAAATAATACTGGAGCTGCATGAT…	MTVHRFVSVVAFLLTGVILVSASPVGECPPVDPLDHTDHLPDDKNCSLFYKCDHAAPVLFVCPDELHFNAVLEVCDWPDVAGCTANTGASSAGCTANTGASSTAAPTAAPTAGSTSASTSTDKPQTDAPVTSSPSRPAEACPAVGTCPQYEDENSIAKHLPHATNCSQFCKCDHGKPVTMDCPAG
TR106086|c0_g1	2.2911	3.44716	17.3765	0.00111252	0.0103006	0	0	0	0	0	0	0	0	0	0	0	TTTTTTTTTTTTTTTTTTTTTTTACCAGACTTTAACACATTTATTTATACATTTGGTACAATTTACACACTTTTCTCAACCAAGGTACAAATAAAAGGACAAATTCAGATCGTTTCACATGTAACACAAAACACAATTGTTCAAACTCTTATTACAAAACGAACTGTAACTGAATACTGTAAATATCTTTTTCACAAAGTGAAATACTTTCATTAACAACAACAAGAGTCATTCGGCACACACATTATTTTCATATGCCTTCTTGTTTTTCCACTTGCACGCTAACACTCAGTCTTGCTTACGAGGTTTGGTATTACCACAAAATTTTCTTACACACACACACACACACACACACACACACACACACACACACACACACACACACACA	0
TR60226|c1_g1	2.28504	5.74737	29.2351	0.000121561	0.00694482	MYORG_HUMAN^MYORG_HUMAN^Q:2404-1670,H:463-711^41.57%ID^E:6e-51^RecName: Full=Myogenesis-regulating glycosidase {ECO:0000312|HGNC:HGNC:19918};^Eukaryota; Metazoa; Chordata; Craniata; Vertebrata; Euteleostomi; Mammalia; Eutheria; Euarchontoglires; Primates; Haplorrhini; Catarrhini; Hominidae; Homo`MYORG_HUMAN^MYORG_HUMAN^Q:3070-2432,H:380-558^38.43%ID^E:1e-33^RecName: Full=Myogenesis-regulating gly…	TR60226|c1_g1|m.9559	126-650[-]	MYORG_HUMAN^MYORG_HUMAN^Q:17-107,H:578-669^44.57%ID^E:6e-17^RecName: Full=Myogenesis-regulating glycosidase {ECO:0000312|HGNC:HGNC:19918};^Eukaryota; Metazoa; Chordata; Craniata; Vertebrata; Euteleostomi; Mammalia; Eutheria; Euarchontoglires; Primates; Haplorrhini; Catarrhini; Hominidae; Homo	PF01055.26^Glyco_hydro_31^Glycosyl hydrolases family 31^31-108^E:1.5e-13	0	0	COG1501^hydrolase, family 31	KEGG:hsa:57462	GO:0005789^cellular_component^endoplasmic reticulum membrane`GO:0016021^cellular_component^integral component of membrane`GO:0031965^cellular_component^nuclear membrane`GO:0004553^molecular_function^hydrolase activity, hydrolyzing O-glycosyl compounds`GO:0005975^biological_process^carbohydrate metabolic process`GO:0043568^biological_process^positive regulation of insulin-like growth factor recept…	GO:0004553^molecular_function^hydrolase activity, hydrolyzing O-glycosyl compounds`GO:0005975^biological_process^carbohydrate metabolic process	CTGCGGGTCGGCCTCGTCCCTCCAGCTGCCCCTGGGCAGGTACACGTCGCGGCTCACCGCGCCCTCCTCCAGCACCGGCGCCACCAGCAACTCCTCACTCGCGGCTCATCTCCACCGTCTCGTTGTCAAAGTCCCAGGGCACGTAGGAGAACTGTATGGCCGGCATGAAGACGTTGGCCTGCAGCCAGCGTATGAAGAGCTCCTTGGTGAGCGCGTCGCTGCCGTAGCCGTTGCCGCCCACCATGTCTGGCAGGACGAAGGGGTAGCCCACCATGTTCATCTGCAAGCTCCACGATGCGCGGGGCGTAGCGGGCGTGCAAGTCCGCCGCGCCCTCCTCCAGCACCGGCGCCACCAACAGGTCTTCTCCAAGCAGGAACTCTGAGTTTATGGCGAGGGCC…	MWNMINKSIPTYIIPSLKYHLLTPAIQFSYVPWDFDDETVELSRQLVALHAQYAPRIVELMRKAAEDGSPVNPPIWWVDPTDDTALAINSEFLLGEDLLVAPVLEEGAADLHARYAPRIVELADEHGGLPLRPARHGGRQRLRQRRAHQGALHTLAAGQRLHAGHTVLLRALGL*
TR66173|c1_g2	2.26573	0.91866	8.9363	0.010494	0.0333885	EIF2D_RABIT^EIF2D_RABIT^Q:92-1729,H:1-553^35.84%ID^E:9e-98^RecName: Full=Eukaryotic translation initiation factor 2D;^Eukaryota; Metazoa; Chordata; Craniata; Vertebrata; Euteleostomi; Mammalia; Eutheria; Euarchontoglires; Glires; Lagomorpha; Leporidae; Oryctolagus	TR66173|c1_g2|m.10826	86-1744[+]	EIF2D_PONAB^EIF2D_PONAB^Q:3-548,H:1-571^36.66%ID^E:2e-109^RecName: Full=Eukaryotic translation initiation factor 2D;^Eukaryota; Metazoa; Chordata; Craniata; Vertebrata; Euteleostomi; Mammalia; Eutheria; Euarchontoglires; Primates; Haplorrhini; Catarrhini; Hominidae; Pongo	PF17832.1^Pre-PUA^Pre-PUA-like domain^4-92^E:8.2e-24`PF01472.20^PUA^PUA domain^107-178^E:1.3e-05`PF01253.22^SUI1^Translation initiation factor SUI1^466-544^E:1e-17	0	0	ENOG410XSAV^translation Initiation Factor	KEGG:pon:100172724`KO:K15027	GO:0005737^cellular_component^cytoplasm`GO:0003743^molecular_function^translation initiation factor activity`GO:0001731^biological_process^formation of translation preinitiation complex	GO:0003723^molecular_function^RNA binding`GO:0003743^molecular_function^translation initiation factor activity`GO:0006413^biological_process^translational initiation	GGTGTATCTAAACAGTGTAATAACTGAGGTGTGAGAACAGCAATCGACGACACAAAATTACATACTTACCGTTGCATAAAGTGAGATGACGCTGTTTAGTAAGACTTTTAAAGTGAAAACAAACTCTCAACTTAAAGGATCAGAAAGAAAAAAGCTGCGATTTGAGATCTTGAAAAATTTTCCACAGTTGAAGGAGGAAGATGTCTTATCTATAATACCAAATAAGGAGGCAGCATCTGTTGTGAAAGTATTCACACACTCAAAGGATTTAGTCATGGTTTACTTTGCTGTAAATAATCCAGTTGTATTTGAATATGAAGGTGTTCTTTTCCCAACAGTATATTTACTGTGGCAATTTCCAGAACTTCTGTACTGTTTCACAACATGGCCACAGGTGTT…	MTLFSKTFKVKTNSQLKGSERKKLRFEILKNFPQLKEEDVLSIIPNKEAASVVKVFTHSKDLVMVYFAVNNPVVFEYEGVLFPTVYLLWQFPELLYCFTTWPQVFPKLAGGADLMLPGVILQGEFNAKSYGNLQKGERVAINTTTNLAPVAVGTTYLSSTDMFLCGKRGKAVRVLHFLGDDLWAQGTKTAVPNLGPPNGFACEKEEEEHDSLQKDNLVSQISEIVIDSPKADSSCSSETEKADDEFSITNTNTLMDEVCEEASEQSEKDSDEKELMDELIMYCFLKALKTTAKKAEYPMLASTFCKQHLLPACPPGKTLDVKKTSYKKLSKFLVEMDAINIIKVKELTKGVQRIMSIDLSHPRFREFVYAEEDNCTSQPETKDQGGKGSPEIKEMYVVT…
TR85668|c0_g1	2.26447	2.25355	16.4065	0.00138692	0.0112029	0	0	0	0	0	0	0	0	0	0	0	AATGATTCGTACACTAATATGATTTTTCTTTTCGTTTTGAGCACATTTTCAACATAAGGTACACAAAGAAACCTAGAGGCTATACTACAACAAAGCGTTTGACAGACTGGTAAAGATATTGTCAATAATGCCCATAGACTGGAAATACTATATGTCAGGTAGCGTAATATATTTCAATACCTTTTGATCTGCTGAATGTTATGGCACAACCTCTCATCATTAAACACACACATTCAGTATTAACGAATGTCACGAAATGTTGTGCCACCGATATCCAGAATGTTGTCTAGTCGTCCTCATGATGACGTCAGTCTAAAGTGGCGTAAGCAAGTAATTTTTGCTCTGTTGCCTCTGGTGAGAATGGACGCCATGGTTTCCACGGATATCGATAGCAGTTGT…	0
TR52701|c0_g1	2.2622	1.17848	10.5306	0.00642106	0.0244489	LPH_RAT^LPH_RAT^Q:259-2,H:1047-1132^52.87%ID^E:7e-22^RecName: Full=Lactase-phlorizin hydrolase;^Eukaryota; Metazoa; Chordata; Craniata; Vertebrata; Euteleostomi; Mammalia; Eutheria; Euarchontoglires; Glires; Rodentia; Myomorpha; Muroidea; Muridae; Murinae; Rattus`LPH_RAT^LPH_RAT^Q:262-2,H:1518-1605^48.86%ID^E:8e-21^RecName: Full=Lactase-phlorizin hydrolase;^Eukaryota; Metazoa; Chordata; Craniata;…	0	0	0	0	0	0	COG2723^beta-glucosidase	0	GO:0016324^cellular_component^apical plasma membrane`GO:0005903^cellular_component^brush border`GO:0016021^cellular_component^integral component of membrane`GO:0008422^molecular_function^beta-glucosidase activity`GO:0017042^molecular_function^glycosylceramidase activity`GO:0000016^molecular_function^lactase activity`GO:0016740^molecular_function^transferase activity`GO:0005975^biological_process^…	0	GTTCGTTCCAAGCACTATTCAGTGTGATGCCCACGTAACCTTGCTGCGACGCCTTGTACTGCTCCTGGTACAGATGGTAGACTCGCGCATGCGCCTTGATGATGGTGTGGGCGGCCAAGTAGTCTCCGATGCCAGGAGCCGGTAGACTGGGTGCTGCCCGCCCAACGGACGCGTAGCCGCTCACTACCGCTGCAGGCTCGTTGAAAGTTATCCAGAATTTCACCCTATCGCCAAAGTTCTCGAAGAGCACTCTTGCGTACTCGACGA	0
TR52006|c0_g1	2.2609	1.46041	13.3444	0.00294037	0.0157124	0	0	0	0	0	0	0	0	0	0	0	GGGGGGGGCATTTTGGGAAAGTGCACTCATTTTGAAATACTTTCACACCGATCATACTTTTGTAATCAGTGGTTAACCACCATTTGCAAGATACTGGGAATAGACATATAAATTCTTGTATGAAATGTATCAGTTCTCTGCATTACTGATTGCCTTTATAGAAAGAATCCCAGCTGTCAGACTGTTCCATTTTTCTAAAAGAATGTGAGAGATAGACTGACTGACAAGATTTTCTGTAAATTAGATATACTCAATATTCACAAACTTTCAGTACTTTCTGTGATACCACAGTTTTCACTTTCAGATTTATTGAATTAATTCCAAATGGCCCAGTATCCATGACATCCCGTGAAGAAAGTGGGTGTCGATAATGCTCTGAAGGCAAATACCAACACTTAA…	0
TR81104|c0_g1	2.2587	2.57749	17.818	0.00100884	0.00997913	0	0	0	0	0	0	0	0	0	0	0	GTCAAACCCTTTGTTGTAGTATAGTCTCTAGGTTTCTTTGTGTACGTTATGTTGAAAATGTGCTCAAAACGAAAAGAAAGATCATATTAGTGTACGAATCATTGGCAGCACTATGAGATGTTAAGAAAGATAGTACTAAAGAAGGAAAACTAGGAATGTTTCTTAAGAGTTGTAGCTGACGATATGTAGGAAACAGTATTCTATAGGACAGATTCGTTAAAAGAGCACGAAGACTTGCGTAAATATTTTTACAGTGGATTTATCATAGACACGAAAAAAACACATCAGTTAATGACAACACATGTCAAGTTATAAAATACTCTAGGTCAGCAAACTTCATGCAAGCAGTATTAACAATCTTTGTCTTGCCAAGATACTTTATCCTTTTTGTTAAAACTT…	0
TR105969|c0_g1	2.25264	1.51639	38.8511	3.1139e-05	0.00694482	AKRCA_ARATH^AKRCA_ARATH^Q:372-13,H:1-120^49.17%ID^E:4e-31^RecName: Full=Aldo-keto reductase family 4 member C10;^Eukaryota; Viridiplantae; Streptophyta; Embryophyta; Tracheophyta; Spermatophyta; Magnoliopsida; eudicotyledons; Gunneridae; Pentapetalae; rosids; malvids; Brassicales; Brassicaceae; Camelineae; Arabidopsis	TR105969|c0_g1|m.1201	1-372[-]	AKRCA_ARATH^AKRCA_ARATH^Q:1-120,H:1-120^49.17%ID^E:2e-31^RecName: Full=Aldo-keto reductase family 4 member C10;^Eukaryota; Viridiplantae; Streptophyta; Embryophyta; Tracheophyta; Spermatophyta; Magnoliopsida; eudicotyledons; Gunneridae; Pentapetalae; rosids; malvids; Brassicales; Brassicaceae; Camelineae; Arabidopsis	PF00248.21^Aldo_ket_red^Aldo/keto reductase family^19-116^E:1.6e-20	0	0	COG0656^reductase	KEGG:ath:AT2G37790	GO:0005829^cellular_component^cytosol`GO:0005634^cellular_component^nucleus`GO:0008106^molecular_function^alcohol dehydrogenase (NADP+) activity`GO:0004032^molecular_function^alditol:NADP+ 1-oxidoreductase activity`GO:0016491^molecular_function^oxidoreductase activity	0	GTCGTCGACGTCCTGGAAGCCCACGGGGTTGTGGATCAGGTAGAGGTCCACGTAGTCCAGCTGCAGGGCGGACAGCGACTTCTTGAGGTACTTCTCCACTCCCGACTGCCGCATCCCCATGAATGGAAGCTTCGTGACGACGAACACGTCTTCTCTCTTGAGCTTCCCGGAGCTGAACCACTTCTTGAGCGTGGCCCCGATCTCCCGCTCGTTGCGGTACAGGAAGGCGGTGTCGATGTGTCTGTATCCTGCCTCTAGCGCCACGTCCAGAGCTTTGCCCACCTCTCCTTCCGACGACTGCCAAGTGCCCAGACCCACAATGGGCATTTTCTGGCCGTTGTGGAAAGTGATGTGCTGGAGTTTGCCGGCCATGTCGCTCAGGTCCTGAGGTGCTGACGA…	MAGKLQHITFHNGQKMPIVGLGTWQSSEGEVGKALDVALEAGYRHIDTAFLYRNEREIGATLKKWFSSGKLKREDVFVVTKLPFMGMRQSGVEKYLKKSLSALQLDYVDLYLIHNPVGFQDVDD
TR52696|c1_g14	2.22054	2.85298	11.5836	0.0047379	0.0204453	CHI10_DROME^CHI10_DROME^Q:285-127,H:866-918^39.62%ID^E:3e-06^RecName: Full=Probable chitinase 10 {ECO:0000312|FlyBase:FBgn0250907};^Eukaryota; Metazoa; Ecdysozoa; Arthropoda; Hexapoda; Insecta; Pterygota; Neoptera; Holometabola; Diptera; Brachycera; Muscomorpha; Ephydroidea; Drosophilidae; Drosophila; Sophophora	TR52696|c1_g14|m.7156	1-384[-]	PE1_ANOGA^PE1_ANOGA^Q:4-87,H:72-152^31.82%ID^E:5e-07^RecName: Full=Peritrophin-1;^Eukaryota; Metazoa; Ecdysozoa; Arthropoda; Hexapoda; Insecta; Pterygota; Neoptera; Holometabola; Diptera; Nematocera; Culicoidea; Culicidae; Anophelinae; Anopheles`PE1_ANOGA^PE1_ANOGA^Q:43-96,H:34-87^38.89%ID^E:7e-06^RecName: Full=Peritrophin-1;^Eukaryota; Metazoa; Ecdysozoa; Arthropoda; Hexapoda; Insecta; Pterygota…	PF01607.24^CBM_14^Chitin binding Peritrophin-A domain^42-86^E:1.9e-13	0	0	0	KEGG:aga:AgaP_AGAP006795	GO:0005576^cellular_component^extracellular region`GO:0008061^molecular_function^chitin binding`GO:0006030^biological_process^chitin metabolic process	GO:0008061^molecular_function^chitin binding`GO:0006030^biological_process^chitin metabolic process`GO:0005576^cellular_component^extracellular region	GCTTGGTGCAGCTGTGGTAGTTTCGGCAGTTGAACTTGGTGCTGAAGTAGGAGCTTGAGTGGTCGCAGCACTGCTTGATGAAGGTGTGGAACTAGTAGGATTTGACGTGCTTCCAGAGCCAGCAGAACATCCAGCGTTTTGTGGCCAGTCACACACTTCGAGAACAGCATTGAAATGCAGTCCAGCTGGACAGTCCATAGTGACAGGTTTACCGTGATCACATTTGCAGAACTGACTGCAGTTTGAGGCATGAGGTAGATGCTTTGCTATTGAATTCTCATCTTCATATTGAGGGCAGACACCGACTGCTGGGCAGTCACCAGATGGGTCTGACGTTGCTGGTGAGCTCGATGCTGCTGTTGATGAAGAGCTTGGTGCAGCTGT	TAAPSSSSTAASSSPATSDPSGDCPAVGVCPQYEDENSIAKHLPHASNCSQFCKCDHGKPVTMDCPAGLHFNAVLEVCDWPQNAGCSAGSGSTSNPTSSTPSSSSAATTQAPTSAPSSTAETTTAAPS
TR68951|c0_g1	2.21539	1.73431	8.28467	0.0129843	0.038818	TRY1_ANOGA^TRY1_ANOGA^Q:2846-2256,H:86-274^44.06%ID^E:5e-41^RecName: Full=Trypsin-1;^Eukaryota; Metazoa; Ecdysozoa; Arthropoda; Hexapoda; Insecta; Pterygota; Neoptera; Holometabola; Diptera; Nematocera; Culicoidea; Culicidae; Anophelinae; Anopheles`TRY1_ANOGA^TRY1_ANOGA^Q:3268-2825,H:47-193^44%ID^E:7e-22^RecName: Full=Trypsin-1;^Eukaryota; Metazoa; Ecdysozoa; Arthropoda; Hexapoda; Insecta; Pteryg…	TR68951|c0_g1|m.11649	3252-3710[-]	TRYA_DROME^TRYA_DROME^Q:9-111,H:4-96^47.57%ID^E:3e-18^RecName: Full=Trypsin alpha;^Eukaryota; Metazoa; Ecdysozoa; Arthropoda; Hexapoda; Insecta; Pterygota; Neoptera; Holometabola; Diptera; Brachycera; Muscomorpha; Ephydroidea; Drosophilidae; Drosophila; Sophophora	PF00089.26^Trypsin^Trypsin^36-104^E:3.4e-15	sigP:1^19^0.78^YES	0	COG5640^protease	KEGG:dme:Dmel_CG18444`KO:K01312	GO:0005615^cellular_component^extracellular space`GO:0004252^molecular_function^serine-type endopeptidase activity`GO:0008236^molecular_function^serine-type peptidase activity`GO:0006508^biological_process^proteolysis	GO:0004252^molecular_function^serine-type endopeptidase activity`GO:0006508^biological_process^proteolysis	GGACAATAACGCAGACTATAATAATGTAAATGGGAAACAATCTTTTATAGTTAGGTTCTATTGTTACAGGTAACGCCTTGGCATAAACAGGGCTCTGAAGAGTGGCCAAGCTATACGCCGGTTTTTTCTGTTATCCAGGACCGAGCTGCGGGAACATTAGAGTAGACTCCGGGGTGGCCGGCCTCAGCGCAAATATTTTATTGTTTTGTTCTCTTGTTACACGTACAGTCTTTGGATTAACAGGGCTCTAAATAGTCACCAAGCTATACGCCGGTTTTTTCTTTTTTTTTTTTTTTTTTTTTTTGCAGATGGAAAACAATATTTTATTGTTTTGTTCTCTTGTTACACGTACAGTCTTTGGATTAACAGGGCTGTAAATAGTCGCCAAGCTATACGCCG…	REMSRSAAVLCLLVAACSAAPPTRVRTLRPLLDGRIVGGEPVDISQFPWQVSMQEFGSHSCGGSIISSTWVLTAGHCIVGYSAAGHCIVGASADRLSVRAGSSTRGSGGTVYEQRDVQVRRRALPAGRCLQRRAPHQGPHAQASPRWPHRGR*
TR37341|c0_g1	2.21207	0.267338	16.3868	0.00139326	0.0112147	0	0	0	0	0	0	0	0	0	0	0	GTTCTTTGTTGTTTCATATATCTGAAGAAAAAGTTAAAAACTTCAACATTATGCATTCTGAGTTAAGACATTCCTATAATCTCGGGATGTACTATCACAGCAAAATCAAGAAGTCAATTCCTCTTTTGTGGGGGAGGCTACAGCGCTGTCACTGCTACCACTGGATGCTCTGACGAGCTAAAATTGTTAAAGTCCACTTTAAACAGCATGCTTTTTCCTACCAGCCCGACACGTTCCACATTATTAGGAAGTGTATGCATGAGCTATGGAACAAGTACTAATCTAATCTTTTAATCTGTTACTAAGATGTGTCAAATGGAACTAAAGTTTACTTCTGAAAGCTTAATCATAGAATACACTTGGCGGTAAATCTTAGTCCAACACCTAGAAATAATTAAA…	0
TR83424|c0_g1	2.20434	2.20708	15.8927	0.00156369	0.0116571	CEGT_HUMAN^CEGT_HUMAN^Q:211-930,H:158-391^42.92%ID^E:1e-52^RecName: Full=Ceramide glucosyltransferase {ECO:0000305};^Eukaryota; Metazoa; Chordata; Craniata; Vertebrata; Euteleostomi; Mammalia; Eutheria; Euarchontoglires; Primates; Haplorrhini; Catarrhini; Hominidae; Homo	TR83424|c0_g1|m.15324	1-951[+]	CEGT_HUMAN^CEGT_HUMAN^Q:71-310,H:158-391^42.92%ID^E:4e-63^RecName: Full=Ceramide glucosyltransferase {ECO:0000305};^Eukaryota; Metazoa; Chordata; Craniata; Vertebrata; Euteleostomi; Mammalia; Eutheria; Euarchontoglires; Primates; Haplorrhini; Catarrhini; Hominidae; Homo	PF13506.6^Glyco_transf_21^Glycosyl transferase family 21^99-197^E:1.2e-21	0	ExpAA=64.08^PredHel=2^Topology=i207-229o234-256i	COG1215^Glycosyl transferase, family 2	KEGG:hsa:7357`KO:K00720	GO:0000139^cellular_component^Golgi membrane`GO:0016021^cellular_component^integral component of membrane`GO:0008120^molecular_function^ceramide glucosyltransferase activity`GO:0102769^molecular_function^dihydroceramide glucosyltransferase activity`GO:0030154^biological_process^cell differentiation`GO:1903575^biological_process^cornified envelope assembly`GO:0008544^biological_process^epidermis d…	GO:0016757^molecular_function^transferase activity, transferring glycosyl groups	GATACATATTCGACGAACCATGTGCGAGTCGTTTTCGTCTGCTGTAACACTTGCGGAGTTATTTACGTTCACAATGACCTTAACATTTTGATTAAAGAAATTAATGTGATTGATGAGCGTCGTGCCTGCATCGGAAAAGCTCACTTCCTTCTTGTAACTTTAATAAGTTGTGTTAGGTTGCAATTAGCAATTCATCACGTGTGCCTAACCCTAAAACAGTGTAAAGAAAATGCAGGTATGAAATTAAGGATACCTGTAGTTTCTGATTTACGTCGTTCAGAATCTTGGAAGAAATGTGAATCACATGTGAAGAAAGTGATTTTTTGTCTATGCGTACACGATATTTATCTTGCAGCAGCTTTCTTGGGTGTGAACTGCCATACTGGTATGTCAACACTT…	DTYSTNHVRVVFVCCNTCGVIYVHNDLNILIKEINVIDERRACIGKAHFLLVTLISCVRLQLAIHHVCLTLKQCKENAGMKLRIPVVSDLRRSESWKKCESHVKKVIFCLCVHDIYLAAAFLGVNCHTGMSTLIKKPLIDEVGGLQAFSCYLAEDFFLAKSLRERGWRMCISSQPAWQNSGQCNISTFQARLTRWAKLRTAMVPHTIFLEPMSECMLLGGCAAWAVSFLFDWDPIVFYLVHILVWFLLDWLLLTIVQNSSLPFNKFDFVVGWLFRELSSPYIFLQALWDPAIRWRGRTFKLRWGGIAEELKPKVKV*
TR70075|c0_g1	2.18445	1.10267	13.9062	0.00254401	0.0145299	TRYU_DROER^TRYU_DROER^Q:487-122,H:131-254^41.13%ID^E:2e-25^RecName: Full=Trypsin eta;^Eukaryota; Metazoa; Ecdysozoa; Arthropoda; Hexapoda; Insecta; Pterygota; Neoptera; Holometabola; Diptera; Brachycera; Muscomorpha; Ephydroidea; Drosophilidae; Drosophila; Sophophora	TR70075|c0_g1|m.12113	98-490[-]	TRYU_DROER^TRYU_DROER^Q:2-123,H:131-254^41.13%ID^E:5e-26^RecName: Full=Trypsin eta;^Eukaryota; Metazoa; Ecdysozoa; Arthropoda; Hexapoda; Insecta; Pterygota; Neoptera; Holometabola; Diptera; Brachycera; Muscomorpha; Ephydroidea; Drosophilidae; Drosophila; Sophophora	PF00089.26^Trypsin^Trypsin^4-123^E:1.1e-28	0	0	0	0	GO:0005615^cellular_component^extracellular space`GO:0004252^molecular_function^serine-type endopeptidase activity	GO:0004252^molecular_function^serine-type endopeptidase activity`GO:0006508^biological_process^proteolysis	AGAGAGAGAGAGAGAGAGAGAGAGAGAGAGAGAGAGAGAGAGAGAGAGACATGATATTCTGTACACTAGCAGCGAGATGATACACTAAACAGGTGCATTAGACTCCACCAAGAATTCCATAAATCCAGTTGCGCAAGGGTACAACATAGGTATAGACGCCAGGATAGCCGGGTAGCCCACATCCGCTGTTCCAGGAGACGATTCCCACTTGCTCCGAACCGGACACTAGGGCACTGCCCTCGTCGCCCGCACAGAAGTCCTTGCCGCCTTCACTCACTCCGGCACAGATCATGTTGATGGTGAGGTTCCCGTAGGTGGCATTGCATGCGGCGGTGTCTATTATTTCGACGGTGACTGCCTGGAGCTCAGAGGGGAGACTGCCGTCGGACGAGGAGACGC…	EPFVFGPDVQAIPVTWNETAVGSPATVAGWGVSSSDGSLPSELQAVTVEIIDTAACNATYGNLTINMICAGVSEGGKDFCAGDEGSALVSGSEQVGIVSWNSGCGLPGYPGVYTYVVPLRNWIYGILGGV*
TR98942|c0_g1	2.18076	3.42389	19.0403	0.000775345	0.00914269	SERA_RAT^SERA_RAT^Q:861-1,H:5-286^54.36%ID^E:2e-104^RecName: Full=D-3-phosphoglycerate dehydrogenase;^Eukaryota; Metazoa; Chordata; Craniata; Vertebrata; Euteleostomi; Mammalia; Eutheria; Euarchontoglires; Glires; Rodentia; Myomorpha; Muroidea; Muridae; Murinae; Rattus	TR98942|c0_g1|m.19375	1-870[-]	SERA_RAT^SERA_RAT^Q:4-290,H:5-286^55.75%ID^E:1e-113^RecName: Full=D-3-phosphoglycerate dehydrogenase;^Eukaryota; Metazoa; Chordata; Craniata; Vertebrata; Euteleostomi; Mammalia; Eutheria; Euarchontoglires; Glires; Rodentia; Myomorpha; Muroidea; Muridae; Murinae; Rattus	PF00389.30^2-Hacid_dh^D-isomer specific 2-hydroxyacid dehydrogenase, catalytic domain^8-178^E:4.3e-28`PF02826.19^2-Hacid_dh_C^D-isomer specific 2-hydroxyacid dehydrogenase, NAD binding domain^113-289^E:1.6e-56`PF07991.12^IlvN^Acetohydroxy acid isomeroreductase, NADPH-binding domain^144-231^E:6.7e-06	0	0	COG0111^Dehydrogenase	KEGG:rno:58835`KO:K00058	GO:0051287^molecular_function^NAD binding`GO:0004617^molecular_function^phosphoglycerate dehydrogenase activity`GO:0006520^biological_process^cellular amino acid metabolic process`GO:0070314^biological_process^G1 to G0 transition`GO:0009448^biological_process^gamma-aminobutyric acid metabolic process`GO:0021782^biological_process^glial cell development`GO:0006541^biological_process^glutamine meta…	GO:0016616^molecular_function^oxidoreductase activity, acting on the CH-OH group of donors, NAD or NADP as acceptor`GO:0051287^molecular_function^NAD binding`GO:0055114^biological_process^oxidation-reduction process	GGCTCCCAGGTGGGGCGTGGCCACCACCTGCGGGTGACGCACCAGCTCCAGCAGCCAATCGGAGCGCGGCGGCTCCTCTGTCAGCACGTCCAGTGCAGCGCCACCACAGCGGCCGTCATTTAGAGCCACCAGCAGTGCCTTCTCATCGATGATCCCTCCTCTTGCGACATTGACTATGCGGACACCACGTTTGCATTTGCTGAGCACTTCATCATTAATCAGATTTCTGGTCTGCGGAATGAGTGGTGTGTGCACGGTGATGTAGTCGGCGCGTGGCCAGATCTCTTCCAGCTCCAGCTTCTCCACACCGAACTGCTGGGCCGCCTCGGCGCTCACCAGAGGGTCGAAGCCGATGGTCGCCATGCCGAAGGCGCGCATGCGCGCCGCCACCTCCCTGCC…	MPVNIASVLVADAVHESCDQILREYGISVTRRLRMTPEELLEEVKRHDALVVRSESKVTAEVVAAGAGASLRAVARAGTGVDNIDVDAATRRGVIVLNTPGGNSVSACELTCSLITVLARNVPAACQSLKEGRWERSKLAGSELSGKTLAVLGLGRIGREVAARMRAFGMATIGFDPLVSAEAAQQFGVEKLELEEIWPRADYITVHTPLIPQTRNLINDEVLSKCKRGVRIVNVARGGIIDEKALLVALNDGRCGGAALDVLTEEPPRSDWLLELVRHPQVVATPHLGA
TR66543|c0_g3	2.16552	3.32123	10.4249	0.00662559	0.024878	0	TR66543|c0_g3|m.10901	1-396[-]	0	0	0	0	0	0	0	0	GACAGGTTTACCATGATCACATTTGCAGAATTGACTGCAGTTTGAGGCATGGGGAAGATGTTTTGCTACTGAATTTTCATCTTCATATTGAGGACAGACACCGATTGCTGGACAATCTCCAGATGGGGCTGACGTTGCTGGTGAGCTGGGTGCTGCAGTGGACGAAGAGCTTGGTGCAGCTGTAGTTGGTTTAGCTGTTGTGGTTGGTGCAGCTGTGGTAGGCTTGTCAGTTGTGCTAGGTGCAGCTGTGGTCGGTTTGACTGATGTGGTCGGTACTGAAGTAGGAGCTGGAGTAGTGGCAGCACTGCTTGTTGAAGGTGTGGAACTAGTAGGATTTGACGTGCTTCCAGAGCCAGCAGAACATCCAGCGTTTTGTGGCCAGTCACACACTTCGAG	LEVCDWPQNAGCSAGSGSTSNPTSSTPSTSSAATTPAPTSVPTTSVKPTTAAPSTTDKPTTAAPTTTAKPTTAAPSSSSTAAPSSPATSAPSGDCPAIGVCPQYEDENSVAKHLPHASNCSQFCKCDHGKPV
TR52701|c4_g1	2.15169	0.730438	10.9041	0.00575473	0.0228304	MYRO1_BREBR^MYRO1_BREBR^Q:1-291,H:33-129^53.61%ID^E:4e-20^RecName: Full=Myrosinase 1 {ECO:0000303|PubMed:11804799};^Eukaryota; Metazoa; Ecdysozoa; Arthropoda; Hexapoda; Insecta; Pterygota; Neoptera; Paraneoptera; Hemiptera; Sternorrhyncha; Aphidomorpha; Aphidoidea; Aphididae; Macrosiphini; Brevicoryne	TR52701|c4_g1|m.7183	1-309[+]	RG1_RAUSE^RG1_RAUSE^Q:1-97,H:50-147^59.18%ID^E:2e-30^RecName: Full=Raucaffricine-O-beta-D-glucosidase;^Eukaryota; Viridiplantae; Streptophyta; Embryophyta; Tracheophyta; Spermatophyta; Magnoliopsida; eudicotyledons; Gunneridae; Pentapetalae; asterids; lamiids; Gentianales; Apocynaceae; Rauvolfioideae; Vinceae; Rauvolfiinae; Rauvolfia	PF00232.18^Glyco_hydro_1^Glycosyl hydrolase family 1^1-101^E:1.6e-38	0	0	0	KEGG:ag:AAF03675`KO:K12695	GO:0050247^molecular_function^raucaffricine beta-glucosidase activity`GO:0050506^molecular_function^vomilenine glucosyltransferase activity`GO:0009821^biological_process^alkaloid biosynthetic process`GO:0005975^biological_process^carbohydrate metabolic process	GO:0004553^molecular_function^hydrolase activity, hydrolyzing O-glycosyl compounds`GO:0005975^biological_process^carbohydrate metabolic process	ATCTGGGACCACATGCTGCACGAGCACCCCGACTGGGGCTGGAACGGCCAGAACGGCGATGTGGCCTGCGACTCGTACCACAAGTACCCCGTCGACGTGGAGTGCCTCGTCAACGCCTCGGCCGACATGTACCGGTTCTCCATCTCGTGGCCGCGCGTCCTGCCCACGGGTGACCTCGACAACATCAACCAGGCCGGCATCGACTACTACAACAACCTCATTGACCTGCTGCTCGCCAACAACATCCAGCCTCTGGTGACGATGTACCACTGGGACCTGCCCGACGAGCTGCTAGCAAACGGAATCCAGC	IWDHMLHEHPDWGWNGQNGDVACDSYHKYPVDVECLVNASADMYRFSISWPRVLPTGDLDNINQAGIDYYNNLIDLLLANNIQPLVTMYHWDLPDELLANGIQ
TR81225|c0_g1	2.14866	3.15288	48.2619	1.0351e-05	0.00694482	AMPM_HELVI^AMPM_HELVI^Q:317-3,H:250-360^48.65%ID^E:1e-21^RecName: Full=Membrane alanyl aminopeptidase;^Eukaryota; Metazoa; Ecdysozoa; Arthropoda; Hexapoda; Insecta; Pterygota; Neoptera; Holometabola; Lepidoptera; Glossata; Ditrysia; Noctuoidea; Noctuidae; Heliothinae; Heliothis	TR81225|c0_g1|m.14695	3-347[-]	AMPM_HELVI^AMPM_HELVI^Q:11-115,H:250-360^48.65%ID^E:1e-21^RecName: Full=Membrane alanyl aminopeptidase;^Eukaryota; Metazoa; Ecdysozoa; Arthropoda; Hexapoda; Insecta; Pterygota; Neoptera; Holometabola; Lepidoptera; Glossata; Ditrysia; Noctuoidea; Noctuidae; Heliothinae; Heliothis	PF01433.20^Peptidase_M1^Peptidase family M1 domain^54-114^E:3.9e-14	0	0	0	0	GO:0031225^cellular_component^anchored component of membrane`GO:0005886^cellular_component^plasma membrane`GO:0004177^molecular_function^aminopeptidase activity`GO:0008237^molecular_function^metallopeptidase activity`GO:0008270^molecular_function^zinc ion binding	GO:0008237^molecular_function^metallopeptidase activity`GO:0008270^molecular_function^zinc ion binding	GGCGTCTCTTGCTCATCCACCAGGATGCGGCGCTCCCTGTAGGTGACGAGGCCCCAGTTCTCCATGGCGCCGGCAGAGAAGTCAGGGATGGACAGCTGGTCCATCTTGGTAATAGTAGACTCGTTGTAATTGATGCCAGTGTAGTTTTCCATAGCCTGGAGTAGGGCAGGGCTCACTGATGCGGCGTAGTTGCGTTGCTCCGTGGCGCTGGGCCTCGACCACAAGTTGTGCGACTCGTCGTCGGCCGACGTCGTCGCGTTGAACTTGGACACGATCACGGCGAACAGGTAGGTCGACATCTTCGGCGTCTGCGCGAACGTGTACTGCGTGCTGCCGTCGGACATGGG	PMSDGSTQYTFAQTPKMSTYLFAVIVSKFNATTSADDESHNLWSRPSATEQRNYAASVSPALLQAMENYTGINYNESTITKMDQLSIPDFSAGAMENWGLVTYRERRILVDEQET
TR64663|c0_g1	2.13084	2.63861	48.452	1.01417e-05	0.00694482	0	0	0	0	0	0	0	0	0	0	0	AACTATTACTATGTACTAATTGTTATCCTATTTGAGCTTGTTGCTATGGTGTGTTTCTAGCCTCATATCCGAAGAGGACAGTGTGACACAACACAATTGTGCTAAAAGAGCAGCCCGGCGGACGTCAAAACCGGTGGCCTCCGTGTGTATAAGACGGTGTCAGCGACCAAAAGAAATCATCAGCTTCCTTCACTGAGGAGTGCAGACAGACAAGTACAGACGCCATGCTGAGACAGGCTTTAGCTATCCTGCTGATCGCAGCTGCCGCCAGTGCCTCATATCCGAAGAGGACAGTGCTGTTCCAAGACCCTGCTGCCTGGACCGGAGAACATAAGTGCTGCATGGGTGTCTTCAACACGCCCCACCGCTACCTCGGATCGTACCTGGTGACGGCCCTGT…	0
TR64663|c0_g2	2.13009	5.11757	39.0546	3.03422e-05	0.00694482	0	TR64663|c0_g2|m.10420	1-381[+]	0	0	0	0	0	0	0	0	CAAAAGAAATCATCAGCTTCCTTCACTGAGGAGTGCAGACAGACAAGTACAGACGCCATGCTGAGACAGGCTTTAGCTATCCTGGTGATCGCAGCTGCTGCCAGTGCCTCGTACCCGAAGAGGACAGTCCTGTTCCAAGACCCTACCGCCTGGACCGGCGAAGGGAAGTGCTGCATGGGTGTCTTCAACACGCCCCACCGCTACCTCGGATCGTACCTGGTGACGGCCCTGTACTTCAGCAGCCACGTGCGCAACTACGCGACGCTGGAGATCGGCCCTGAGCAGCAGGACATCAATATCACCATGAGCGAGTTCCCTGCTGGAGGGGATGCCTGGAGGGTGGTGGGTACCGGCAGGTATACGGGGGTGTCTGAGCCCACG	QKKSSASFTEECRQTSTDAMLRQALAILVIAAAASASYPKRTVLFQDPTAWTGEGKCCMGVFNTPHRYLGSYLVTALYFSSHVRNYATLEIGPEQQDINITMSEFPAGGDAWRVVGTGRYTGVSEPT
TR45928|c0_g2	2.12677	9.53285	12.1973	0.00399528	0.0184915	HSP83_DROAV^HSP83_DROAV^Q:128-2266,H:4-716^82.89%ID^E:0^RecName: Full=Heat shock protein 83;^Eukaryota; Metazoa; Ecdysozoa; Arthropoda; Hexapoda; Insecta; Pterygota; Neoptera; Holometabola; Diptera; Brachycera; Muscomorpha; Ephydroidea; Drosophilidae; Drosophila; Sophophora	TR45928|c0_g2|m.5254	95-2269[+]	HSP83_DROME^HSP83_DROME^Q:12-724,H:4-717^83.19%ID^E:0^RecName: Full=Heat shock protein 83;^Eukaryota; Metazoa; Ecdysozoa; Arthropoda; Hexapoda; Insecta; Pterygota; Neoptera; Holometabola; Diptera; Brachycera; Muscomorpha; Ephydroidea; Drosophilidae; Drosophila; Sophophora	PF13589.6^HATPase_c_3^Histidine kinase-, DNA gyrase B-, and HSP90-like ATPase^34-155^E:1.2e-10`PF02518.26^HATPase_c^Histidine kinase-, DNA gyrase B-, and HSP90-like ATPase^36-189^E:9.8e-15`PF00183.18^HSP90^Hsp90 protein^192-704^E:1.1e-233	0	0	COG0326^Molecular chaperone. Has ATPase activity (By similarity)	KEGG:dme:Dmel_CG1242`KO:K04079	GO:0009986^cellular_component^cell surface`GO:0005813^cellular_component^centrosome`GO:0005737^cellular_component^cytoplasm`GO:0005829^cellular_component^cytosol`GO:0048471^cellular_component^perinuclear region of cytoplasm`GO:0005886^cellular_component^plasma membrane`GO:0005705^cellular_component^polytene chromosome interband`GO:0032991^cellular_component^protein-containing complex`GO:0005524^m…	GO:0005524^molecular_function^ATP binding`GO:0051082^molecular_function^unfolded protein binding`GO:0006457^biological_process^protein folding	GGCATTACTTTGCTCGGGGAGACTCGTGAGAGAAGGTTGCTGTTGTTTGCGTTGCTATAGTTTCTGAACCGCGGCTGTGAAGGAGCTGTTGAAGATGCCGGAGGACGTACAGATGCAAGATGCGGCAGAAGTCGAGACCTTCGCCTTCCAGGCGGAGATCGCTCAATTGATGTCACTAATTATCAATACATTCTATTCAAATAAGGAAATATTCCTTAGAGAGCTGATCTCCAACTCATCAGATGCCTTGGATAAAATTCGTTACGAATCCCTGACGGATCCTTCGAAACTGGAGTCTGGCAAAGATTTGTGGATAAAAATCGTTCCCAACAAGAGTGAGCGGACTCTGACAATTATTGATACTGGCATTGGAATGACGAAAGCAGACCTAGTCAACAA…	MPEDVQMQDAAEVETFAFQAEIAQLMSLIINTFYSNKEIFLRELISNSSDALDKIRYESLTDPSKLESGKDLWIKIVPNKSERTLTIIDTGIGMTKADLVNNLGTIAKSGTKAFMEALQAGADISMIGQFGVGFYSAYLVADKVTVASKHNDDEQYLWESSAGGSFTIRPDPGEPLGRGTKITLYIKEDQTEFLEERKIKEIVKKHSQFIGYPIKLVVEKERDKELSEEEEEEEKKEGGEEGDNESKPKIEDVGEDEEDESGDKKKKKKKTIKEKYLEDEELNKTKPIWTRNPDDISQEEYGEFYKSLTNDWEDHLAVKHFSVEGQLEFRALLFIPRRAPFDLFENKKRKNNIKLYVRRVFIMDNCEDLIPEYLNFIKGVVDSEDLPLNISREMLQQNK…
TR43028|c0_g1	2.12448	3.30943	40.1484	2.64424e-05	0.00694482	AK1A1_BOVIN^AK1A1_BOVIN^Q:13-738,H:91-325^41.46%ID^E:6e-51^RecName: Full=Aldo-keto reductase family 1 member A1;^Eukaryota; Metazoa; Chordata; Craniata; Vertebrata; Euteleostomi; Mammalia; Eutheria; Laurasiatheria; Cetartiodactyla; Ruminantia; Pecora; Bovidae; Bovinae; Bos	TR43028|c0_g1|m.4747	1-741[+]	AK1A1_BOVIN^AK1A1_BOVIN^Q:5-246,H:91-325^41.46%ID^E:9e-52^RecName: Full=Aldo-keto reductase family 1 member A1;^Eukaryota; Metazoa; Chordata; Craniata; Vertebrata; Euteleostomi; Mammalia; Eutheria; Laurasiatheria; Cetartiodactyla; Ruminantia; Pecora; Bovidae; Bovinae; Bos	PF00248.21^Aldo_ket_red^Aldo/keto reductase family^3-218^E:1.1e-38	0	0	COG0656^reductase	KEGG:bta:618607`KO:K00002	GO:0016324^cellular_component^apical plasma membrane`GO:0005829^cellular_component^cytosol`GO:0045202^cellular_component^synapse`GO:0008106^molecular_function^alcohol dehydrogenase (NADP+) activity`GO:0004032^molecular_function^alditol:NADP+ 1-oxidoreductase activity`GO:0047655^molecular_function^allyl-alcohol dehydrogenase activity`GO:0047941^molecular_function^glucuronolactone reductase activit…	0	CGGCAGTCGGGAGTGGAGAAGTACCTCAAGAAGTCGCTGTCCGCCCTGCAGCTGGACTACGTGGACCTCTACCTGATCCACAACCCCGTGGGCTTCCAGGACGTCGACGACGGCGGCTTCCCCAAGGACAAGGACGGCAACGTGCTCCTCGACGCGACCACCGACCACGTCGCCATATGGAAGGGAATGGAGGCCCAGGTGGACGCAGGCCGTGCTCGCTCCATAGGTCTGTCCAACTTCAACGCGCGCCAGATCAAGCGCGTGTGGGAGTCAGCGCGCATCAAGCCGGCGAACCTGCAGGTGGAGATGCACATCTACTTCCAGCAGCGCGAGCTCAGGGCCTTCTGCCGCGCCCTCGACATCACCTTCTGCGCCTTCGGACCCCTCGGCTCGCCGCAC…	RQSGVEKYLKKSLSALQLDYVDLYLIHNPVGFQDVDDGGFPKDKDGNVLLDATTDHVAIWKGMEAQVDAGRARSIGLSNFNARQIKRVWESARIKPANLQVEMHIYFQQRELRAFCRALDITFCAFGPLGSPHIYPFVESQGGDVSKLPRYNQLSDPLVKQIAQKHGKTTAQVLIRFLMQLEVAVIPKSSNPARIKENFAVFDFELSPEEMEALEALDKGPKGRQANEHVLPGLGRHPEFPWFDRY*
TR56571|c0_g3	2.11928	4.46649	21.6098	0.000460897	0.00789236	PE1_ANOGA^PE1_ANOGA^Q:721-1119,H:34-147^33.58%ID^E:3e-13^RecName: Full=Peritrophin-1;^Eukaryota; Metazoa; Ecdysozoa; Arthropoda; Hexapoda; Insecta; Pterygota; Neoptera; Holometabola; Diptera; Nematocera; Culicoidea; Culicidae; Anophelinae; Anopheles`PE1_ANOGA^PE1_ANOGA^Q:454-855,H:36-151^31.85%ID^E:4e-11^RecName: Full=Peritrophin-1;^Eukaryota; Metazoa; Ecdysozoa; Arthropoda; Hexapoda; Insecta; Pt…	TR56571|c0_g3|m.8321	328-1119[+]	PE1_ANOGA^PE1_ANOGA^Q:43-176,H:36-151^33.33%ID^E:4e-14^RecName: Full=Peritrophin-1;^Eukaryota; Metazoa; Ecdysozoa; Arthropoda; Hexapoda; Insecta; Pterygota; Neoptera; Holometabola; Diptera; Nematocera; Culicoidea; Culicidae; Anophelinae; Anopheles`PE1_ANOGA^PE1_ANOGA^Q:132-264,H:34-147^33.58%ID^E:8e-14^RecName: Full=Peritrophin-1;^Eukaryota; Metazoa; Ecdysozoa; Arthropoda; Hexapoda; Insecta; Pter…	PF01607.24^CBM_14^Chitin binding Peritrophin-A domain^34-85^E:3.6e-10`PF01607.24^CBM_14^Chitin binding Peritrophin-A domain^131-176^E:6.9e-11`PF01607.24^CBM_14^Chitin binding Peritrophin-A domain^222-264^E:1.1e-09	sigP:1^21^0.822^YES	0	0	KEGG:aga:AgaP_AGAP006795	GO:0005576^cellular_component^extracellular region`GO:0008061^molecular_function^chitin binding`GO:0006030^biological_process^chitin metabolic process	GO:0008061^molecular_function^chitin binding`GO:0006030^biological_process^chitin metabolic process`GO:0005576^cellular_component^extracellular region	ACCTTTTGCGGACAGTAACCTGACTTGAGCAAACATGAGAGGATTTCCACTACTTGTGACCGTCGTGTTAGCGGCCTTGGTTGGAAGCAGCGTTGCAGCTTCCATCCGAAAGGTGACTGTGGTTAGTGCAACTTGCCAGGGAGCGTCCGGGCCATTTCCGAACCCGGACAGCTGCTCAAGTTTCCTTCAGTGCGAGCCGTCAGGTGTCGCAACGGTCATCCCGTGCCCAGCAAACCTCGAGTTCAATCCAAAGCTGAGGGTGTGTGACTACCCAGAGAGAGCAGGTTGCTCCTCATCCTCGTCTCCTCCCAGCATCTGGCGAACAACATGACAGGACTGACACTTCTTGAGATTGCCGTACTGGTGACTTTGATCGGAAGCGGCAGTGGAGCTTCCATC…	MTGLTLLEIAVLVTLIGSGSGASIRKVTVVSATCQGASGPFPNPNSCRSFLQCEPSGVATVIPCPANLEFNPKLRVCDFPDRAGCSSSSSPPADDDNGSGGGSDDNGGASPAPPSDEAPTCPPWNPDDVTQLPNPNDCSSFYKCDENGVAWVIECPAGLEYNAELRVCDYPENAGCSSNPSEDTPSEGDEDDENSNGGNEVSPNPPAGDAPTCPEWNPNDVTQLPNPSDCSSFYKCDENGVAWLIPCPDGLEYNAELRVCDYPE
TR89594|c2_g1	2.10951	6.74008	17.2274	0.00115031	0.010456	PCKG_DROME^PCKG_DROME^Q:2866-1445,H:24-497^73.21%ID^E:0^RecName: Full=Phosphoenolpyruvate carboxykinase [GTP];^Eukaryota; Metazoa; Ecdysozoa; Arthropoda; Hexapoda; Insecta; Pterygota; Neoptera; Holometabola; Diptera; Brachycera; Muscomorpha; Ephydroidea; Drosophilidae; Drosophila; Sophophora`PCKG_DROME^PCKG_DROME^Q:982-806,H:491-547^81.36%ID^E:1e-23^RecName: Full=Phosphoenolpyruvate carboxykinase…	TR89594|c2_g1|m.16871	1331-2938[-]	PCKG_DROME^PCKG_DROME^Q:25-498,H:24-497^73.21%ID^E:0^RecName: Full=Phosphoenolpyruvate carboxykinase [GTP];^Eukaryota; Metazoa; Ecdysozoa; Arthropoda; Hexapoda; Insecta; Pterygota; Neoptera; Holometabola; Diptera; Brachycera; Muscomorpha; Ephydroidea; Drosophilidae; Drosophila; Sophophora	PF17297.2^PEPCK_N^Phosphoenolpyruvate carboxykinase N-terminal domain^56-283^E:4.4e-97`PF00821.18^PEPCK_GTP^Phosphoenolpyruvate carboxykinase C-terminal P-loop domain^287-500^E:4.8e-110	0	0	COG1274^Catalyzes the conversion of oxaloacetate (OAA) to phosphoenolpyruvate (PEP), the rate-limiting step in the metabolic pathway that produces glucose from lactate and other precursors derived from the citric acid cycle (By similarity)	KEGG:dme:Dmel_CG17725`KO:K01596	GO:0005829^cellular_component^cytosol`GO:0005739^cellular_component^mitochondrion`GO:0005525^molecular_function^GTP binding`GO:0030145^molecular_function^manganese ion binding`GO:0004613^molecular_function^phosphoenolpyruvate carboxykinase (GTP) activity`GO:0071333^biological_process^cellular response to glucose stimulus`GO:0006094^biological_process^gluconeogenesis`GO:0046327^biological_process^…	GO:0004611^molecular_function^phosphoenolpyruvate carboxykinase activity`GO:0006094^biological_process^gluconeogenesis	ACACACACACACACACACACACACACACACACACACACACAAACCTTTTTTTTCATTTACAAAGGACATTGTAGCAGTATAAAAACATATAACACAATCATCATAAAAAAATATAGTTGATGAGATGTTTAGTGGGAAACATGTCTCCTGAGGCTTTTGGGCACTTGGCACTCCATAGGGCAGCATGCAGCATTTATTTTAAATCCTAGTCTTCATCACATTGTTTGTACTCTTTCCCTCAATCGGTTAAGTTCTTCAGCAATTGCTGAGGGTAGGTCTTTTCCAACTTGTTCTCTGAAGTATTTTTCAACATCATGAACCTCTTGAAGCCAAAAGTCCTTGCAAAAATCCAGAAATATTTATTTTTAGAAGTGATATTACATCACAATACTTAATTCA…	MPDFIADKAPRDQCTALVSRYAKTLSQPNVGLFNHLRGVNVTNGDVHLLSPKVRAYLEETVSLCQPENIHICDGSERENVHLLNLMQRQGTIQKLPKYENCWLARTNPADVARVESRTFVCTTNRSETIPDVAPGVKGVLGNWMSPGQMEEAIGERFPGCMRGRTMYVIPFSMGPIGSPLSKIGIEVTDSPYVVSSMRIMTRMGTPVLDLLAEGADFVKCLHSVGSPAKPTNEYASWPCDPERTIILQRPDNNEIVSYGSGYGGNSLLGKKCFALRIGSTIAKREGWLAEHMLILGITNPAGKKRYIAAAFPSACGKTNLAMMNPTLPGYKVECVGDDIAWMKFDENGQLRAINPENGFFGVAPGTSNQTNPNAMKTIFRNTIFTNVAATNDGGVFWEG…
TR93769|c0_g1	2.108	2.82726	12.2237	0.00396654	0.0184035	TRET1_APILI^TRET1_APILI^Q:562-2,H:157-344^35.98%ID^E:1e-29^RecName: Full=Facilitated trehalose transporter Tret1 {ECO:0000303|PubMed:20035867};^Eukaryota; Metazoa; Ecdysozoa; Arthropoda; Hexapoda; Insecta; Pterygota; Neoptera; Holometabola; Hymenoptera; Apocrita; Aculeata; Apoidea; Apidae; Apis	TR93769|c0_g1|m.18268	2-643[-]	TRET1_ANOGA^TRET1_ANOGA^Q:7-214,H:426-634^36.67%ID^E:6e-38^RecName: Full=Facilitated trehalose transporter Tret1 {ECO:0000303|PubMed:20035867};^Eukaryota; Metazoa; Ecdysozoa; Arthropoda; Hexapoda; Insecta; Pterygota; Neoptera; Holometabola; Diptera; Nematocera; Culicoidea; Culicidae; Anophelinae; Anopheles	PF00083.24^Sugar_tr^Sugar (and other) transporter^6-214^E:7.5e-39	0	ExpAA=108.81^PredHel=5^Topology=o10-32i39-61o66-88i146-168o188-210i	ENOG410XNQK^Transporter	KEGG:aga:AgaP_AGAP005563`KO:K14258	GO:0005887^cellular_component^integral component of plasma membrane`GO:0005886^cellular_component^plasma membrane`GO:0005351^molecular_function^carbohydrate:proton symporter activity`GO:0015574^molecular_function^trehalose transmembrane transporter activity`GO:0015771^biological_process^trehalose transport	GO:0022857^molecular_function^transmembrane transporter activity`GO:0055085^biological_process^transmembrane transport`GO:0016021^cellular_component^integral component of membrane	GGCCCAGCCGGTCTGCGGCGAGCGGCGTGATGCACGAGGCCACGATCATGACGGCGCCCACCACGATCTGCGACACCTCCGCCCCGAGGCCGGTGTTGGCCTGCTTGAAGATGTCCTGGCCGTAGAAGAGCACCGAGTTGATGCCCGACAGCTGCTGGAACAGCACCAGCCCCAGGGACAGGCACAGCGCCAGCACGTTGCCGCGCACCCTAAACAGGTCGCCCATCGACGCCTTGTTCCGCCGCAGCTCCTCCACCGCTTCCTGCATGACTTTGAGCTCGCCGGAAGTGTCTGCGCCCTCGTCGCGGAACCACTGGAGCGCCTTCTCGGCGCCGGCGACATCGTCCTTCTGGAGGAACTGGTAGGGCGTCTCGGGCATCCAGAAGAAGGCCGCCGCGA…	LPHDGKVGLLYAARLVSGAAVGVVYVALPMYIGEMSQPSIRGALGTLMQLIISLGMMVMYGAGPYISTLALGGISLVVPLLFAAAFFWMPETPYQFLQKDDVAGAEKALQWFRDEGADTSGELKVMQEAVEELRRNKASMGDLFRVRGNVLALCLSLGLVLFQQLSGINSVLFYGQDIFKQANTGLGAEVSQIVVGAVMIVASCITPLAADRLG
TR52701|c6_g1	2.10666	1.03924	10.8775	0.00579939	0.0229373	MYRO1_BREBR^MYRO1_BREBR^Q:285-1,H:55-149^64.21%ID^E:3e-36^RecName: Full=Myrosinase 1 {ECO:0000303|PubMed:11804799};^Eukaryota; Metazoa; Ecdysozoa; Arthropoda; Hexapoda; Insecta; Pterygota; Neoptera; Paraneoptera; Hemiptera; Sternorrhyncha; Aphidomorpha; Aphidoidea; Aphididae; Macrosiphini; Brevicoryne	0	0	0	0	0	0	0	0	GO:0102799^molecular_function^glucosinolate glucohydrolase activity`GO:0046872^molecular_function^metal ion binding`GO:0019137^molecular_function^thioglucosidase activity`GO:0005975^biological_process^carbohydrate metabolic process	0	TCTTGCGTACTCGACGAAGTAGTCTGCCAGAATTGGATTTGGCCATCCACCAATGTACTGCAGCGCTTGAGGAAGATCCCAGTGGTACATCGTCACCAGCGGTTGGATCCCATTTTCCAGAAGCAGATCGATGAGGCTGTTGTAGTAATCGAGACCTGCCTGATTAATCACATCTGTATCGCCAGTTGGCAAAATTCGAGCCCAAGAAATAGAGAAACGATACACATTTGCATTCAAATTCTTCAGAGCCTGTACGTCTTCCGCGTACTTGTGGTATGAGTCGCAG	0
TR53714|c0_g1	2.09953	2.78466	28.0834	0.000146168	0.00694482	A4GAT_RAT^A4GAT_RAT^Q:2178-1642,H:182-355^32.78%ID^E:7e-23^RecName: Full=Lactosylceramide 4-alpha-galactosyltransferase;^Eukaryota; Metazoa; Chordata; Craniata; Vertebrata; Euteleostomi; Mammalia; Eutheria; Euarchontoglires; Glires; Rodentia; Myomorpha; Muroidea; Muridae; Murinae; Rattus	TR53714|c0_g1|m.7472	1624-2178[-]	A4GAT_RAT^A4GAT_RAT^Q:1-179,H:182-355^32.78%ID^E:2e-25^RecName: Full=Lactosylceramide 4-alpha-galactosyltransferase;^Eukaryota; Metazoa; Chordata; Craniata; Vertebrata; Euteleostomi; Mammalia; Eutheria; Euarchontoglires; Glires; Rodentia; Myomorpha; Muroidea; Muridae; Murinae; Rattus	PF04488.15^Gly_transf_sug^Glycosyltransferase sugar-binding region containing DXD motif^1-34^E:2.2e-09`PF04572.12^Gb3_synth^Alpha 1,4-glycosyltransferase conserved region^57-179^E:1.8e-30	0	0	ENOG4111PD8^lactosylceramide	KEGG:rno:63888`KO:K01988	GO:0000139^cellular_component^Golgi membrane`GO:0016021^cellular_component^integral component of membrane`GO:0008378^molecular_function^galactosyltransferase activity`GO:0050512^molecular_function^lactosylceramide 4-alpha-galactosyltransferase activity`GO:0015643^molecular_function^toxic substance binding`GO:0001576^biological_process^globoside biosynthetic process`GO:0007009^biological_process^p…	0	GGCCACCCCGAAGAATGAGATGATGATGATGATGATGATGACAACACAACACCCAGTCCCTGAGCGGAGAAAATCTCCGACCCAGCCTGGAATCGAACCCGGGCCTCTTTGCACGGCATTCCGCCGCGCTGACCACTCTGCTATCTGGACGGACGTACTGGTTATTTACATTAAACAACATAAATCTAAAATGTAACATTGAATACGACCATTTTGTTAACACAATTGAAAATTTAAACCTCTAAGACGATTTTAAATGTGGGTGATCTTTAAGGGAAAGTGTATTATTGAACGAATCATGTGATAAAATATATGCTTCTGAAAGTTTTGAAATCGAAAATAGCAAGAGATATTAAATAAGACAAATAATGGTTTTACGAATTTGTACAAATTAATTTC…	SDVMRLVALWRYGGLYLDLDFVVLRNLSKMGENWIAAESTYSLANGAMHMSSLPGSAGKELANTYMETLRTEFDGQQWTSNGGAILKKLLLQRCNVTKVMVMRNCRGFRVLGPALLYPVPFQKWRKYFSEEDTNSTLADMHRAYAAHVWNKLSEEAGVVPQNSAYAKLARENCPNSFRAAAGHF*
TR52696|c1_g2	2.08548	7.14872	8.47808	0.0121793	0.0369937	PE1_ANOGA^PE1_ANOGA^Q:577-152,H:39-151^29.37%ID^E:1e-09^RecName: Full=Peritrophin-1;^Eukaryota; Metazoa; Ecdysozoa; Arthropoda; Hexapoda; Insecta; Pterygota; Neoptera; Holometabola; Diptera; Nematocera; Culicoidea; Culicidae; Anophelinae; Anopheles	TR52696|c1_g2|m.7167	2-709[-]	PE1_ANOGA^PE1_ANOGA^Q:45-187,H:39-152^31.25%ID^E:3e-14^RecName: Full=Peritrophin-1;^Eukaryota; Metazoa; Ecdysozoa; Arthropoda; Hexapoda; Insecta; Pterygota; Neoptera; Holometabola; Diptera; Nematocera; Culicoidea; Culicidae; Anophelinae; Anopheles`PE1_ANOGA^PE1_ANOGA^Q:143-203,H:34-94^37.7%ID^E:4e-06^RecName: Full=Peritrophin-1;^Eukaryota; Metazoa; Ecdysozoa; Arthropoda; Hexapoda; Insecta; Pteryg…	PF01607.24^CBM_14^Chitin binding Peritrophin-A domain^39-83^E:2.5e-13`PF01607.24^CBM_14^Chitin binding Peritrophin-A domain^142-186^E:3.2e-13	sigP:1^22^0.842^YES	0	0	KEGG:aga:AgaP_AGAP006795	GO:0005576^cellular_component^extracellular region`GO:0008061^molecular_function^chitin binding`GO:0006030^biological_process^chitin metabolic process	GO:0008061^molecular_function^chitin binding`GO:0006030^biological_process^chitin metabolic process`GO:0005576^cellular_component^extracellular region	CATTTTGTGGGCAGGTGCCGACAGCTGGACAGTCTCCCGATGGAGCAGGGTTAGCTGTTGAGCTTGGTGCTGAAGTTGGAACAGCTGTAGTGGCAGCACTTGTAGGAGCAGATGTGGAGCTGGGAGCTGAAGTCGATGCTGATCCACCTGCACAACCAGCATTTTCTGGCCAATCACACACCTCCAGAGTAGGATTGAAGTGGAGTCCAGCAGGGCAGTCGAACGTTACCGGTACCCCATGGTCACATTTGCAGAACTGACTGCAGTTTGAGGCATGTGGAAGATGCTTAGCAATAGAATTCTCATCTTCATTTTGTGGGCATGTGCCAACTGCTGGACAGTCTCCTGATGGAGCAGGTTTGGCTGTTGAACTTGGTGCTGAAGTTGGAGCAGCTGTAG…	MNLRASVLTTVLVVIATAAVHASPVGDCPPVDPVDHTDHLPDSQNCSLFYKCDHAAPVLFVCPDGLHFNPTLEVCDWPDNAGCTGGSASTSAPSSTSAPTSAATTAAPTSAPSSTAKPAPSGDCPAVGTCPQNEDENSIAKHLPHASNCSQFCKCDHGVPVTFDCPAGLHFNPTLEVCDWPENAGCAGGSASTSAPSSTSAPTSAATTAVPTSAPSSTANPAPSGDCPAVGTCPQN
TR37341|c1_g1	2.08232	7.98472	12.3085	0.0038757	0.0182121	LSD2_DROME^LSD2_DROME^Q:293-1000,H:35-289^45.1%ID^E:3e-61^RecName: Full=Lipid storage droplets surface-binding protein 2;^Eukaryota; Metazoa; Ecdysozoa; Arthropoda; Hexapoda; Insecta; Pterygota; Neoptera; Holometabola; Diptera; Brachycera; Muscomorpha; Ephydroidea; Drosophilidae; Drosophila; Sophophora	TR37341|c1_g1|m.2969	263-1069[+]	LSD2_DROME^LSD2_DROME^Q:11-246,H:35-289^45.1%ID^E:2e-69^RecName: Full=Lipid storage droplets surface-binding protein 2;^Eukaryota; Metazoa; Ecdysozoa; Arthropoda; Hexapoda; Insecta; Pterygota; Neoptera; Holometabola; Diptera; Brachycera; Muscomorpha; Ephydroidea; Drosophilidae; Drosophila; Sophophora	PF03036.16^Perilipin^Perilipin family^14-260^E:2.6e-23	0	0	0	KEGG:dme:Dmel_CG9057`KO:K17284	GO:0005829^cellular_component^cytosol`GO:0005811^cellular_component^lipid droplet`GO:0031887^biological_process^lipid droplet transport along microtubule`GO:0019915^biological_process^lipid storage`GO:0006869^biological_process^lipid transport`GO:0007275^biological_process^multicellular organism development`GO:0050995^biological_process^negative regulation of lipid catabolic process`GO:0010890^bi…	0	GAGCGGCAAAGTGGAACTAGTTGTGTTCAACACTTGCTTTGTGTTGTGGCTTTTCGTTAGTGTTGTTTGTGGAAAGGATTACAATGGCCGAAGGAGCGGCAAAGTGGAACTAGTTGTGTTCAACACTTGCTTTGTGTTGTGGCTTTTCGTTAGTGTTGTTTGTGGTAAGCTGGTAGTGGTTGAAGTCGCATTTTGATTACAGTACGTATCCGTGCCGTTAGTGTTATTGTACTGTAATTTACTTTTAAAGGAAAGGATTACAATGGCCGAAGCGCAGAATATGTCTGTAGCACCGAGACTGGAATGCGTCGACAGAGTTAGGACGCTCCCTGTTGTTGAAATGGCGTTGAATCAGTCGGCTGATATGTATAACAGGGTTAAAGGATCTAATAGTGTCTT…	MAEAQNMSVAPRLECVDRVRTLPVVEMALNQSADMYNRVKGSNSVFNWTLSTAEATVNKAMEHAAPLAKKLEQPIQMVDGTLCKGLSLVEERLPIIKEQPQQIYETTKNYVAATLRPTCSKVSTVKDAGVQKAKSLKELSWNKANELLSTKYGLAAVTTVDSTAAVAEKYLDYYFPPGEDEKQAVPVSSKEDKVAHTVSTVGRLSSKLAQRVYSTLVKQVQNLNRENVQEYIASLIAVVQLTNYINAYLKPAEVKTEQEKPESQNVSS*
TR65559|c0_g1	2.05725	1.48548	11.2513	0.00520653	0.0216254	0	0	0	0	0	0	0	0	0	0	0	GAAAGAGAAAGAGAGAGAGAGAGAAATCTCAGTTAATGTAACATTTAGCGCATTTCCAAGACCTCTAAGCCCATTCACATGATCACATGACACAGGTTTATTCAACTAATGGATTGCGGACATAAGTCCGTCTATGAGAAAGTCTTTACATCATTGTTATTTCTGACTGTTACAGCATTAGATCAGTAACAATAACAGCAACAGTAATAACAAGAATAATTACAATTAAAATTATTATAAACTGTGGACTCTATAAAATTCATTACGGACTGTAAATACTTAAACCACTAATTGCCACTAAAATTTTCTTACATAATCATTCCTCCATGATGCTGTTATCTGAATACATTAAGCTGTAAATGTACTGTACTGAAAAGTCTAATGGCATGAACACTGCTG…	0
TR65138|c0_g1	2.05404	1.13188	14.2533	0.00233013	0.0139892	TRET1_APILI^TRET1_APILI^Q:857-495,H:366-484^34.71%ID^E:1e-14^RecName: Full=Facilitated trehalose transporter Tret1 {ECO:0000303|PubMed:20035867};^Eukaryota; Metazoa; Ecdysozoa; Arthropoda; Hexapoda; Insecta; Pterygota; Neoptera; Holometabola; Hymenoptera; Apocrita; Aculeata; Apoidea; Apidae; Apis	TR65138|c0_g1|m.10574	429-911[-]	TRET1_DROWI^TRET1_DROWI^Q:2-139,H:717-854^29.71%ID^E:1e-17^RecName: Full=Facilitated trehalose transporter Tret1 {ECO:0000250|UniProtKB:A1Z8N1};^Eukaryota; Metazoa; Ecdysozoa; Arthropoda; Hexapoda; Insecta; Pterygota; Neoptera; Holometabola; Diptera; Brachycera; Muscomorpha; Ephydroidea; Drosophilidae; Drosophila; Sophophora	PF00083.24^Sugar_tr^Sugar (and other) transporter^2-133^E:1.7e-16	0	ExpAA=81.14^PredHel=4^Topology=i5-27o42-64i71-88o103-122i	ENOG410XNQK^Transporter	KEGG:dwi:6643376`KO:K14258	GO:0016021^cellular_component^integral component of membrane`GO:0005886^cellular_component^plasma membrane`GO:0015574^molecular_function^trehalose transmembrane transporter activity`GO:0015771^biological_process^trehalose transport	GO:0022857^molecular_function^transmembrane transporter activity`GO:0055085^biological_process^transmembrane transport`GO:0016021^cellular_component^integral component of membrane	GCTAAGACGCTGAAACTAAGTGGCAGTCGTATCAATGAAAGAGCCCTCTTCACCTAGGCCAAAAACGGGTGAAGTATCAGGAGTAAACGTAAATCCCTGCTGATCTGCTCTTTATATACATATATATCGACTTGTAGAATGATCGTTTATAAAAATGGAGGAACTTATATTTTCACTGGAGACGGCCAGGTAAGCCTACGATCTCTTGCAATAAATAATCTCTTTGCAGCAAATACAATAAAGTGGTGTGGTTGATATTTTGTATGAATGTAAAATATAATGCGAATGATAACGCTTCTTCAGCAGCGCCGAAAAGTCTAGAATGTCGAAAGGCTATCACAGTCAAGAGATGGGCGACACTTTTCATTATACTGGGCGCATCAGAGTTTGTCATATTGT…	PLMVCFAGAAVALVAEGLYFYLLDVAQADVAAFSWLPLASHILYLVCMTMGPGALIWTVCSEVFRPRVKGIAMSVLSIVNCGSAFATLKTYHAMSTHFELCVSFWMFAIFCAFAVFYVWRFVPETKGRLAEEVALEIAGIKPGRTEDETATKEEREKIKV*
TR86870|c0_g3	2.04532	4.34558	9.91517	0.00772539	0.0273995	LCTL_HUMAN^LCTL_HUMAN^Q:541-1536,H:171-504^43.03%ID^E:5e-81^RecName: Full=Lactase-like protein;^Eukaryota; Metazoa; Chordata; Craniata; Vertebrata; Euteleostomi; Mammalia; Eutheria; Euarchontoglires; Primates; Haplorrhini; Catarrhini; Hominidae; Homo`LCTL_HUMAN^LCTL_HUMAN^Q:2-538,H:138-315^48.33%ID^E:8e-45^RecName: Full=Lactase-like protein;^Eukaryota; Metazoa; Chordata; Craniata; Vertebrata; Eut…	TR86870|c0_g3|m.16132	550-1575[+]	LCTL_HUMAN^LCTL_HUMAN^Q:1-329,H:174-504^43.11%ID^E:7e-84^RecName: Full=Lactase-like protein;^Eukaryota; Metazoa; Chordata; Craniata; Vertebrata; Euteleostomi; Mammalia; Eutheria; Euarchontoglires; Primates; Haplorrhini; Catarrhini; Hominidae; Homo	PF00232.18^Glyco_hydro_1^Glycosyl hydrolase family 1^2-322^E:1.6e-68	0	0	COG2723^beta-glucosidase	KEGG:hsa:197021	GO:0005903^cellular_component^brush border`GO:0005783^cellular_component^endoplasmic reticulum`GO:0005789^cellular_component^endoplasmic reticulum membrane`GO:0016021^cellular_component^integral component of membrane`GO:0008422^molecular_function^beta-glucosidase activity`GO:0005975^biological_process^carbohydrate metabolic process`GO:0002089^biological_process^lens morphogenesis in camera-type e…	GO:0004553^molecular_function^hydrolase activity, hydrolyzing O-glycosyl compounds`GO:0005975^biological_process^carbohydrate metabolic process	CCTCATCAACGAGCTGCTGGCCAACGGAATTCAACCTGTGGTGACGATGTACCACTGGGACCTTCCCCAAGCGCTGCAGTACCTCGGTGGGTGGGCTAACGAGGTCATGGTAGACTACTTCGCGGACTACGCCAAGCTGCTCTTCGACAATTACGGAGACAGGGTGAAGTGGTGGATCACGTTCAACGAGCCCACCATCTTCGCCGGCGGCTACACGACGAGCGGCGGCACGCCGCCCTCTCAGAACGCCCCCGGCATCGGCGACTACCTCACCTACTACACCGTCATCAACGCGCACGCCCGCGTCTGGCACCTCTACAACGACACGTACAGGGCCACGCAGCAGGGTCGCGTCGGAATCGTGCTCAACAGTGAGTGGCACGAGCCGAAGAACGCATC…	MADYFVEYARLLFDTYGDRVKWWITFNEPSVFAGGYASTGGQAPAQNAVGIGDYLTYYTVINAHARVWHLYNDTYRATQQGYVGITLNSDWAEPLNASSPTDQEASERSLQFGIGAFGHALFTAEGDWPPVMRERIDANSAAEGRPRSRLPAFTQQQIEYNRGTTDFIGLNTYATNLVTLGETGTIPSKAHDQGVIISYDPNWIVGASGYVYIVPWGFRKLLNWLSNAYPQYPIMVTENGFSDWGETQDDLRMTYHGHYMAELLNAINVDGNNIIGYMAWSIIDNLEWTQGFRPRWGVYRVDIDDPDLPRTPKASLELMNGIYTSRTVPLEYFNSTVFARP*
TR89726|c0_g1	2.04013	6.73788	19.2554	0.000741069	0.00904252	TRYP_FUSOX^TRYP_FUSOX^Q:1546-1971,H:98-244^42.95%ID^E:4e-26^RecName: Full=Trypsin;^Eukaryota; Fungi; Dikarya; Ascomycota; Pezizomycotina; Sordariomycetes; Hypocreomycetidae; Hypocreales; Nectriaceae; Fusarium; Fusarium oxysporum species complex`TRYP_FUSOX^TRYP_FUSOX^Q:596-994,H:36-166^39.1%ID^E:2e-19^RecName: Full=Trypsin;^Eukaryota; Fungi; Dikarya; Ascomycota; Pezizomycotina; Sordariomycetes; Hy…	TR89726|c0_g1|m.16999	605-1333[+]	TRY1_ANOGA^TRY1_ANOGA^Q:2-119,H:63-180^44.07%ID^E:3e-23^RecName: Full=Trypsin-1;^Eukaryota; Metazoa; Ecdysozoa; Arthropoda; Hexapoda; Insecta; Pterygota; Neoptera; Holometabola; Diptera; Nematocera; Culicoidea; Culicidae; Anophelinae; Anopheles	PF00089.26^Trypsin^Trypsin^1-137^E:7e-28	0	0	COG5640^protease	KEGG:aga:AgaP_AGAP008296`KO:K01312	GO:0005576^cellular_component^extracellular region`GO:0004252^molecular_function^serine-type endopeptidase activity`GO:0008236^molecular_function^serine-type peptidase activity`GO:0007586^biological_process^digestion	GO:0004252^molecular_function^serine-type endopeptidase activity`GO:0006508^biological_process^proteolysis	TGTTGCGCCTCCTCCTCGCCATCCTGTGTCTGGTGTCTTGTGGCCTGGCCGCCCCCCGGCCGGTCAGGGTCAGGACCAGAGGGAACGGCCGGATAATCGGCGGCACCACCACCGACATATCCAGCTACCCGTGGATGGTATCCATGCAGATTAACGGCTACCACGCCTGTGGGGCCTCCGTCATCAGCAGCAACTGGGTGCTGACAGCCGGCCACTGCCTCTACGGCGCCAACATTGTTGCGCCTCCTCCTCGCCATCCTGTGTCTGGTGTCTTGTGGCCTGGCCGCTCCCCGGCCGGTCAGGGTCAGGGCCAGAGGTGACGGCCGGATAATCGGCGGCACCTTCACCGACATATCCAGCTACCCGTGGATGGTATCCATGCAGATCAACGGCCTTCAT…	MVSMQINGYHACGASVISSNWVLTAGHCLYGANIATYSVRAGTTTRESGGVVSAVAYGVLHGYYDPNTVDYDISLLQVASPLPIGGNIQVVGLPADGYDPPGGLAVTISGWGATATSGQLAPFNLMKVDITVYHDPRERRRRVCRGVRRTARLLRPQHDRLRHLGAAGSHSSTHRWQHTDRGSPCPRLRPARRARSHRHRLGRHSHHRAACTAYDDEGGHQHHRPRQLRDHFRRHRPHDLRR*
TR87224|c0_g1	2.03334	4.44661	13.3833	0.00291074	0.0155993	CAHZ_DANRE^CAHZ_DANRE^Q:1678-917,H:3-255^36.29%ID^E:1e-37^RecName: Full=Carbonic anhydrase;^Eukaryota; Metazoa; Chordata; Craniata; Vertebrata; Euteleostomi; Actinopterygii; Neopterygii; Teleostei; Ostariophysi; Cypriniformes; Cyprinidae; Danio	TR87224|c0_g1|m.16325	845-1834[-]	CAH15_MOUSE^CAH15_MOUSE^Q:43-306,H:15-289^34.66%ID^E:1e-42^RecName: Full=Carbonic anhydrase 15;^Eukaryota; Metazoa; Chordata; Craniata; Vertebrata; Euteleostomi; Mammalia; Eutheria; Euarchontoglires; Glires; Rodentia; Myomorpha; Muroidea; Muridae; Murinae; Mus; Mus	PF00194.21^Carb_anhydrase^Eukaryotic-type carbonic anhydrase^55-308^E:7.2e-81	0	0	COG3338^Carbonic anhydrase	KEGG:mmu:80733`KO:K01672	GO:0046658^cellular_component^anchored component of plasma membrane`GO:0005576^cellular_component^extracellular region`GO:0016020^cellular_component^membrane`GO:0004089^molecular_function^carbonate dehydratase activity`GO:0008270^molecular_function^zinc ion binding	0	TTTTGCCTTTCACGATAAGTTTTATTAAAATACTCATATGTACAGAAAATTATATACACATAATAAATAAGGGATGTTTCTAATTCTACAGGCTTGTGTGATATGCAATTTTAATACGACACGTATTTGCAGATGACAAAACTTTCATAAAATCCCGGAACACTGCCAGCAGTGTTTCATATGCAACATACACACTGATCAGGCACTCAATGGCGTAAATATTCATAACAGTAAAACAAAATGCAGCATTTTGTAGCTGTCGTGAGTGGAGATTTTTTAAGTACAGTACAGCTTGAAATAAGTGAAGATAATGACGTCAGTTCCTTTAAGATGAACATTAAAGAAAGATAGAAAACAAATCTACATCTTGTATTGTCAACTGGTACATATATTGGAATG…	PAGSRRAPVARRPPAPPEARSATYRSAQMSMDTTAVCLIACLLFARVSSHGNHLFGYTKEEQELWSEHSDACAGRYQSPIRIISHRAQRLPIPALEMVGFHNLLPGPVVATNTGHSVSLRPAVTGESWPKVFGALLLHEYQLESFHFHWGHRFSRGSEHVLNSIRFPMEMHIVHRNMKYSSLNEAMQKPDGLAVLAFFFQAQEKNNHALRPILEVLERVKFPGDSSPLHISFSLSSLLTADMDAFYTYRGSLTTPPCSESVTWVIFPDALPISFSQIKKFRRIYSSGEDRMVNNFRVLQPLNSRNVFVRKLWKIESYNLTSHDSVSWLS*
TR80462|c0_g2	2.02546	6.4666	16.0142	0.00151964	0.0115438	0	0	0	0	0	0	0	0	0	0	0	TTTTATTACAAATGTGAATATATTAATACGTTTATTAAAACTACATGTCATTTTAGTAATAACATACACATAATGGCATCACAGTCGAATAATATCACAGTCTTTGCATAACAATTACGATTATGTAACATTTAGGATTAGTGATAGTGCTGCAGATATCCCATTTCTTGTAAACTAAACTTGACTGAATTGACTAACACGTATATGGAACTGAAAAATAAGTTACAAAAAAGTCATAGTGGTATATGACACAATAAGTCCTTAAAAGGTAATTGTTGTTCTACTTTATATACTTTATACAATTGTAGTATTGCTAAATGAAGGTAACATGGGACTTCAATTGTTTGCGAAATCACGCCTAATGAACTACAGATGTGTAACACTACCTTTATATCTACC…	0
TR90718|c2_g1	2.02254	2.19553	13.2014	0.00305247	0.0159484	UGT3_PLEPL^UGT3_PLEPL^Q:361-14,H:275-390^38.79%ID^E:6e-24^RecName: Full=UDP-glucuronosyltransferase;^Eukaryota; Metazoa; Chordata; Craniata; Vertebrata; Euteleostomi; Actinopterygii; Neopterygii; Teleostei; Neoteleostei; Acanthomorphata; Carangaria; Pleuronectiformes; Pleuronectoidei; Pleuronectidae; Pleuronectes	TR90718|c2_g1|m.17253	2-361[-]	UGT3_PLEPL^UGT3_PLEPL^Q:1-116,H:275-390^38.79%ID^E:5e-24^RecName: Full=UDP-glucuronosyltransferase;^Eukaryota; Metazoa; Chordata; Craniata; Vertebrata; Euteleostomi; Actinopterygii; Neopterygii; Teleostei; Neoteleostei; Acanthomorphata; Carangaria; Pleuronectiformes; Pleuronectoidei; Pleuronectidae; Pleuronectes	PF00201.18^UDPGT^UDP-glucoronosyl and UDP-glucosyl transferase^1-118^E:3.3e-30`PF04101.16^Glyco_tran_28_C^Glycosyltransferase family 28 C-terminal domain^37-112^E:1.9e-07	0	0	0	0	GO:0005789^cellular_component^endoplasmic reticulum membrane`GO:0016021^cellular_component^integral component of membrane`GO:0015020^molecular_function^glucuronosyltransferase activity	GO:0016758^molecular_function^transferase activity, transferring hexosyl groups	GGTGCTCGCGGAACAGCCGAGAATACTGCGCCATCCTCTCCTTGTAGCTGGGATCGTGTATAATTTTGTTGATGGCGTCGAGCACAGTCTCCTTGCTGATATCCTTCAAATAGATACGGATGCCGATGCCTGCTGAGTTTATCTTCGCGCAGTTGTGCGTCTGATCAGAGAAGTACGGAGTGACAATCAGGGGCACAGCCCGGTAAGCTGCTTCGTTCAGGCTCTGCAGTCCGCCTTGCATGATGAACAGCTTAACTTTAGGGTGGGCCAGAATGCCCTGCTGGGGCAGCCACTTCCTCACGAGTACGTTGTCTGGGAGGTCAGGGATGTTGTCGTCCTCCCACTTCCAGAGGACCCTCTG	QRVLWKWEDDNIPDLPDNVLVRKWLPQQGILAHPKVKLFIMQGGLQSLNEAAYRAVPLIVTPYFSDQTHNCAKINSAGIGIRIYLKDISKETVLDAINKIIHDPSYKERMAQYSRLFREH
TR80298|c0_g1	1.99667	2.87021	14.8078	0.00203024	0.0130872	0	0	0	0	0	0	0	0	0	0	0	AACTAAATTTATTGGTTTTAATATCTTACAGAAAATTGTATACTGTCCATACAAAAACAGCGCATAGGAACATAGACACGGTCAAATACTGGTACACATAATGTCACTATGTGAACTAGTCAGGCTTAAAAGAGTTTTTAGGAACATTATTGTTAACCTACGGCAATACAAGATCAGTATCAATACAGGGAAAAAGGCTTCGTGATGTAGGTAGCATACTGCTATCGCAATACTGTCCCAGTTTCCGCCTCCTCTCGAATGTTTCCTTGTCGTATAATCTTCGTTATTGTTTCAGTCATCCTGTCTTGCAGTTTTTCCTTCTTGATACGGCGAACCACGAATATGTCTAGTTTATCATTTTTTGGAGTAACTGAGACTTCATTGTCAACGAGATGTCAG…	0
TR102822|c0_g2	1.99399	1.00716	17.3809	0.00111145	0.0102997	0	0	0	0	0	0	0	0	0	0	0	CGACGATTCAATCCCCCCTCCGGCCATTCTGATTTAGGTTATCCGTGATTTCCCTAAATCGCTCCAGACATGGTTCCTTTGAAAGGGCACGGCCCACATCCTTCCCCGTCCTTCAATACTCCAACGACACCGATCACCTGGCTGTTTGGCCTTCTCCTTCCAAGCAGCCAAACCCGAACCTAACTAGCCATCAGTAACCGTTGAGCTATATTGCTCCTTTTTCTTGCCGAGTAACAGTCAATAATTAAAACGTGGAGGTATTTTTTTTGAATGAATAATCAACACTGAGGTAAGACGTAGTAATCTCATTACATATTTAAGGATATTGGTTACTCCCTTACATAAAACGAAAACAAAATTTCAGTGTCTACCCGAAG	0
TR59608|c0_g1	1.97994	3.11865	20.213	0.000608277	0.00855535	MYORG_MOUSE^MYORG_MOUSE^Q:1800-136,H:138-713^31.96%ID^E:7e-91^RecName: Full=Myogenesis-regulating glycosidase;^Eukaryota; Metazoa; Chordata; Craniata; Vertebrata; Euteleostomi; Mammalia; Eutheria; Euarchontoglires; Glires; Rodentia; Myomorpha; Muroidea; Muridae; Murinae; Mus; Mus	TR59608|c0_g1|m.9194	121-1995[-]	MYORG_MOUSE^MYORG_MOUSE^Q:66-620,H:138-713^31.96%ID^E:3e-91^RecName: Full=Myogenesis-regulating glycosidase;^Eukaryota; Metazoa; Chordata; Craniata; Vertebrata; Euteleostomi; Mammalia; Eutheria; Euarchontoglires; Glires; Rodentia; Myomorpha; Muroidea; Muridae; Murinae; Mus; Mus	PF01055.26^Glyco_hydro_31^Glycosyl hydrolases family 31^243-621^E:3.2e-52	sigP:1^17^0.827^YES	0	COG1501^hydrolase, family 31	KEGG:mmu:329828	GO:0005789^cellular_component^endoplasmic reticulum membrane`GO:0016021^cellular_component^integral component of membrane`GO:0031965^cellular_component^nuclear membrane`GO:0004553^molecular_function^hydrolase activity, hydrolyzing O-glycosyl compounds`GO:0005975^biological_process^carbohydrate metabolic process`GO:0043568^biological_process^positive regulation of insulin-like growth factor recept…	GO:0004553^molecular_function^hydrolase activity, hydrolyzing O-glycosyl compounds`GO:0005975^biological_process^carbohydrate metabolic process	TTTTTTTTTATTAACCTAACATCTATTTCCAGCAGCCATCATACAGGTTAATGGTAGCACAGTCCCGTCACTAAAATGACCAGCGGCGCTCGTACTGCCTTCACATTACGCCAGCTCGAGCTAGGCGCTGACTCTGGTGAAGTAGGGCAGAGTGTTGAGCGGCGCGGGGTAGCTGTGTAGCCAGGCCGGACCCTGAATGGTGGGGTGCTCGGGGTCCGCCTCATCCCGCCACATCCCCTTCGGCAGGTAGATGTCGCGACTGTCGTTGTCGTGCCACACCACTGGCGCCACCAGAATGTCGTCGCCCAGCAGGAACTCTGAGTCGATTGTGAGTGCCGTGGGATCCGTTGGGTCGATCCACCAGATTGGCCTGTTGACGGGAGTGCCGTCCTCAACGGC…	LLLPLLLGVFLVGPAECSTGLNTRYDEATGRILILAHRGGREVEVGYVEATGDKQSPAPRHESQIDGDSFHFRSSKVVFRRQDRTGRCLTAQQWINSSVAAETMCQYHLGSHVYGGIESTYQKWPIEQNVIDRYPYVTNKRDHAAIAARYWLFSDGRLVRVHSNSPLFIDQNTDQTQNQLCFVAENKSPYAEERPDNLLEYELCWFDDVRQAHEFAVQKYLGKPTAIPDERMVANPTWTVAPPEQNVRDRVADIMDHGFEYSVIEINDQWETCHGSLTVDTSNFPDMRALTDDLHALGWAVSLWIHPFVNQDCEPFYSEALANGYLVRNKNGSTATSWWRGDAGIVDFTNPDAVAWWTSRLSALRNETGVDTFRFDYGESSYLPQPADITPLEKSPVVF…
TR67832|c3_g1	1.97938	0.951318	24.8974	0.000250689	0.00704774	PATH_DROME^PATH_DROME^Q:307-2,H:4-114^35.14%ID^E:8e-17^RecName: Full=Proton-coupled amino acid transporter-like protein pathetic {ECO:0000305};^Eukaryota; Metazoa; Ecdysozoa; Arthropoda; Hexapoda; Insecta; Pterygota; Neoptera; Holometabola; Diptera; Brachycera; Muscomorpha; Ephydroidea; Drosophilidae; Drosophila; Sophophora	TR67832|c3_g1|m.11220	2-328[-]	PATH_DROME^PATH_DROME^Q:8-109,H:4-114^35.14%ID^E:2e-17^RecName: Full=Proton-coupled amino acid transporter-like protein pathetic {ECO:0000305};^Eukaryota; Metazoa; Ecdysozoa; Arthropoda; Hexapoda; Insecta; Pterygota; Neoptera; Holometabola; Diptera; Brachycera; Muscomorpha; Ephydroidea; Drosophilidae; Drosophila; Sophophora	PF01490.18^Aa_trans^Transmembrane amino acid transporter protein^56-108^E:1.2e-11	0	ExpAA=23.62^PredHel=1^Topology=i83-105o	COG0814^amino acid transport	KEGG:dme:Dmel_CG3424`KO:K14209	GO:0030424^cellular_component^axon`GO:0030425^cellular_component^dendrite`GO:0036019^cellular_component^endolysosome`GO:0016021^cellular_component^integral component of membrane`GO:0031902^cellular_component^late endosome membrane`GO:0005765^cellular_component^lysosomal membrane`GO:0043025^cellular_component^neuronal cell body`GO:0043204^cellular_component^perikaryon`GO:0005886^cellular_component…	0	TGTGGGACGACCGCACCAGCATGTGGACGCAGTGCGCGCAGAGCATGCCGATGAGCACGGTCCCAACGAAGCCGACGACGGTGCCCGCGTTCTTGAAGGCCATCGGCATCGCCAGGATCCCGGAACCGAGGCTGCCTTTCAGCAGGTGCATCAGCGAACCCAGGTCCGAGTTGGGGTGCTCCACATGCCTCTCGGAGAACGGGTCGTAGTCTGAGGCTTCCTGCTGTTTCTTCACAGTCGGCTTCGTCGTCAGCTGCACCGTGGAGGAGAAGTTGTCAGCTGAGGTCGGCGGTCCGGTATCGATTACTCTTCCTTGATCGACCCCCATGCTTGTCGTCAGCAACCTGGTGCTAATGACGCTGACGCTGAAAAGACGAGCCTATCCTTGGCTCGAGGTGG…	MGVDQGRVIDTGPPTSADNFSSTVQLTTKPTVKKQQEASDYDPFSERHVEHPNSDLGSLMHLLKGSLGSGILAMPMAFKNAGTVVGFVGTVLIGMLCAHCVHMLVRSSH
TR98171|c1_g1	1.97744	5.18886	37.7878	3.57171e-05	0.00694482	0	TR98171|c1_g1|m.19246	2-334[-]	0	0	sigP:1^31^0.575^YES	0	0	0	0	0	CCCTGAGCAGCAGGACATCAATATCACCATGAGCGAGTTCCCTGCTGGAGGGGATGCCTGGAGGGTGGTGGGTACCGGCAGGTATACGGGGGTGTCTGAGCCCACGCAGCTGCTGAGGATCCCCATCACCTACCAGACCGACCCCACGGCCGCCTACCTGTTCGAGATCGTGTATGGTGGCCCCCTCACCTACCCCAGCTATGGCGCCATCGATGTCTCCGCGGGACCCTACAACACGACAAGCAACTACTTCATACTCGGTATTGACTACGAGAACCCATGAGAGAACCAAACTCCTGACTGCAGTAGCTGTAATTATTGTCAACTTATACATTTAAAATAAAACGTGTTATCAACAGTTGCTGATTGGTTTTTGGACCTAAAACAAAAATTGTTTGG…	MYKLTIITATAVRSLVLSWVLVVNTEYEVVACRVVGSRGDIDGAIAGVGEGATIHDLEQVGGRGVGLVGDGDPQQLRGLRHPRIPAGTHHPPGIPSSRELAHGDIDVLLLR
TR92219|c0_g1	1.97661	6.02063	22.7155	0.000373084	0.0075291	KLF11_MOUSE^KLF11_MOUSE^Q:1557-1294,H:379-466^75%ID^E:8e-41^RecName: Full=Krueppel-like factor 11;^Eukaryota; Metazoa; Chordata; Craniata; Vertebrata; Euteleostomi; Mammalia; Eutheria; Euarchontoglires; Glires; Rodentia; Myomorpha; Muroidea; Muridae; Murinae; Mus; Mus	TR92219|c0_g1|m.17835	1174-2577[-]	KLF11_MOUSE^KLF11_MOUSE^Q:279-428,H:299-466^50%ID^E:2e-44^RecName: Full=Krueppel-like factor 11;^Eukaryota; Metazoa; Chordata; Craniata; Vertebrata; Euteleostomi; Mammalia; Eutheria; Euarchontoglires; Glires; Rodentia; Myomorpha; Muroidea; Muridae; Murinae; Mus; Mus	PF00096.26^zf-C2H2^Zinc finger, C2H2 type^346-370^E:0.00052`PF00096.26^zf-C2H2^Zinc finger, C2H2 type^376-400^E:0.00015`PF00096.26^zf-C2H2^Zinc finger, C2H2 type^407-428^E:0.0091	0	0	COG5048^Zinc finger protein	KEGG:mmu:194655`KO:K09209	GO:0005829^cellular_component^cytosol`GO:0005925^cellular_component^focal adhesion`GO:0016604^cellular_component^nuclear body`GO:0005654^cellular_component^nucleoplasm`GO:0005634^cellular_component^nucleus`GO:0003677^molecular_function^DNA binding`GO:0003700^molecular_function^DNA-binding transcription factor activity`GO:0000981^molecular_function^DNA-binding transcription factor activity, RNA po…	GO:0003676^molecular_function^nucleic acid binding	TTTTTTTTTTTTTTTTTTTTTTTAAATATTAACATATTTAATATATAATGATGTACACAAAATTAATGTGATGTATTTACAATATAGTATGAGAAATTACAACCTCATGTTCCTTTTTTAAAGAGTTCTTTTATACCATCTTTTTTGTACAAATTCAACAGTCATGGTTATAGTTGTATAAACTTCTCTTAAAAATAAAAATATAATAAATATCTACTTTATTGCAGTACTTAGATCACAGTATCAGTTCTTTTTTAAAACCTGAAAATTGCTTAATGCTTAGTCAGTCAAGGTACCCCCACAATTAGAAGGGTCCACAACTATGCTTTGGTAGGAAAAAAAAAGTCCACTACGTAATACCTGCATACCACTCCCTTAATAAATTCCACAGAGAAAACT…	MEGSSSMVLSPPTTPPPPQQPNAAAAAVDLQAVSSLLTASAAVAGCRKRKLIAAYEFSQQMSPPALPTPQPSDSEGEEVAITADLPPRKRVCRQYATLLQAPTPPRTPSPEATAVTSMPVSVIMRANKDGTCSPQPFAATEKTAGDKSVEPAPVTADPSKLPQEREVNILKSLKFKMSTRKEEIFVNSKDTNRESSVPELKITSPVPANLPSAVVPSRQSLSPPPVVCGRQQQRSQLNLSAAGCAVPPSSHSISNGHQPVPIAPKPVAPRTAGAQAVILAGGALIPVSPRALTLLHVAPPAATGGPARGSAPASTPATAAPIVLLAAPPPAEEPVQATVDTRRRVYECNFEGCNKNYFKSSHLKAHMRTHTGEKPFVCAWEQCGRRFSRSDELSRHKRT…
TR107836|c0_g2	1.97579	3.12946	23.1496	0.000344021	0.0073888	DNJB9_HUMAN^DNJB9_HUMAN^Q:766-164,H:12-221^40.89%ID^E:2e-35^RecName: Full=DnaJ homolog subfamily B member 9 {ECO:0000305};^Eukaryota; Metazoa; Chordata; Craniata; Vertebrata; Euteleostomi; Mammalia; Eutheria; Euarchontoglires; Primates; Haplorrhini; Catarrhini; Hominidae; Homo	TR107836|c0_g2|m.1589	161-835[-]	DNJB9_HUMAN^DNJB9_HUMAN^Q:24-224,H:12-221^43.56%ID^E:3e-43^RecName: Full=DnaJ homolog subfamily B member 9 {ECO:0000305};^Eukaryota; Metazoa; Chordata; Craniata; Vertebrata; Euteleostomi; Mammalia; Eutheria; Euarchontoglires; Primates; Haplorrhini; Catarrhini; Hominidae; Homo	PF00226.31^DnaJ^DnaJ domain^38-99^E:9.9e-29	0	0	COG0484^ATP binding to DnaK triggers the release of the substrate protein, thus completing the reaction cycle. Several rounds of ATP-dependent interactions between DnaJ, DnaK and GrpE are required for fully efficient folding. Also involved, together with DnaK and GrpE, in the DNA replication of plasmids through activation of initiation proteins (By similarity)	KEGG:hsa:4189`KO:K09515	GO:0005737^cellular_component^cytoplasm`GO:0005783^cellular_component^endoplasmic reticulum`GO:0005788^cellular_component^endoplasmic reticulum lumen`GO:0005789^cellular_component^endoplasmic reticulum membrane`GO:0070062^cellular_component^extracellular exosome`GO:0005730^cellular_component^nucleolus`GO:0051087^molecular_function^chaperone binding`GO:0030544^molecular_function^Hsp70 protein bind…	0	GTGCAAAAAATGAAACTGTGATATAGTGGCAAGGAAGAGCAATAATAATACTAAGAATATAATAATAATAATAATAATAGTAATAATAATAAAAAGTCTCAACAAATTTACAGAATATTTAAACAATAAATTACAGCTGCTATGTGCACATCACAGGAACTTATGAACACTGAGTGTATGTGGTAACCATATTGCCAATGCGCTGGGTCACTGTCCTACAGCGACCACCAGAAAACTCTGAATGGCTCCTATGGGAGTGTTGTTGATTGTGACCATAGTGAGTTCCAAAGAATGAGCTCCCTACTTTGTGGTCAAATCCAGTATGACTGAAGAAAGGGGTGTCATCCTCTTCCCATAAGTCATCGAAGCTAAAGAAGTTGTGTGGCTGCTCATGATGAA…	MLVLCFLNMKSEKILLYFTLASFIHFTLIAQITAKERDYYEVLGVQRTASDREIKKAFRKLAIKYHPDKNKEKGAEAKFQEIAQAYEVLSDPDKRRKYDQFGSSAFASAGAGGGGGGGAHHFNFDDLFQSDFGRHTFNFNPHSHMFHHEQPHNFFSFDDLWEEDDTPFFSHTGFDHKVGSSFFGTHYGHNQQHSHRSHSEFSGGRCRTVTQRIGNMVTTYTQCS*
TR46322|c0_g1	1.97462	2.91041	15.3606	0.00177492	0.0122897	0	0	0	0	0	0	0	0	0	0	0	CGAAAAATCCTACCAAGCGGCTTCATCTTTCATTCCTTTCCCACAGTTGATACTGACTTACTATTTTTCCTTCTCTTTCTTTTCCCATTATCGAAGTTCAGTGCCCCATTAGTATTAAATGTTCCTCTCCCTTTTTTACATGAATAATTTCTTTTATCCCAACATTCATTCTTTCAATCTCTTCAGCTAGATAATAGTTGGCATACAAACTTGTACCACAGTAGTAGTTGTCCCTTTCGTATCTATCTTGGTTATGAAATGCGTTTTCAATGCTGTTTATAGCAGCTTACCCACAGCCCATTCTCTTATTCATTATTAGACCTACTCCCGCATTACCCTTATTTTATTTTATGGTTATATCCCAGTTCTTACCTGACCAGAAATCCTGTTCCTTCTAAC…	0
TR90718|c1_g1	1.97106	1.86866	13.4257	0.0028788	0.0155141	UDB20_MACFA^UDB20_MACFA^Q:291-1,H:246-340^37.76%ID^E:1e-14^RecName: Full=UDP-glucuronosyltransferase 2B20;^Eukaryota; Metazoa; Chordata; Craniata; Vertebrata; Euteleostomi; Mammalia; Eutheria; Euarchontoglires; Primates; Haplorrhini; Catarrhini; Cercopithecidae; Cercopithecinae; Macaca	0	0	0	0	0	0	0	KEGG:mcf:102128580`KO:K00699	GO:0005789^cellular_component^endoplasmic reticulum membrane`GO:0016021^cellular_component^integral component of membrane`GO:0015020^molecular_function^glucuronosyltransferase activity	0	CCACTTCCAGAGGACCCTCTGCGGTATCTCCCTGAAGGCGTCCACGAACGCCTGCCTCCTGTGTTCCGGCAGCTCGCTGCTCCTGACGTTCGAGCCCAGGTTGAAGTAGATGACTCCATGCTCAGCTTCGTCCAGAAACTTCTGGATATCCTTCGGCAGAGGCTTCACTTTATCTTCTACGTGTAGTCCCGTGACTTCAATCACGTTCGGTACATTTGGTCTCGGGTAGTGACCGCTGAAATGGGCAGCTACAATCAGCATACTGAAGTTGCGTTCCACTTCGTAAACGGAAGG	0
TR89818|c0_g1	1.96166	3.41457	18.121	0.000944123	0.00976105	0	0	0	0	0	0	0	0	0	0	0	GGTAAAACATTTTATAGGGATTCCGTTAAGAAAATGGCAAACAGTCAATAGACGTTGTCGCTTTCGACGAAATAGAGCCACGTAAGTGGAGAAAACGTCGCTTGTAATCCTTTAAGGCTATTGTCGACAAATATTCTACATTTTCTCTCTATGTAACAAACTTAAAGAATACAAACTATTCAATAAATTCTAAAGCTGCTTCTAAATGAATACAACGCGTCAAGTTAATAATTAATATTACCATTTTGCGTGAGAACACTTAAAATAGTTTCTAAAATGATATGGCGACCGAAAAAGATTACAGATCACCTTAATTTTATGCGATATAGGCTATCATGATGCTCGGATTATAGCGTGGACACTTGATCATTTTTCAATGAAAAGGTACTAGAACAATGA…	0
TR50330|c0_g3	1.95806	1.82247	14.62	0.00212651	0.0134181	0	0	0	0	0	0	0	0	0	0	0	TCCAAGTTATAGTCATTTAATTCCCACAACAAGAGAGAGTCTTCTGCGGGCTCTTTCTTCCCTCATCTAGTCCAAATCAATGCTTTAAGATGTCAATCAGTATATGAACTCAGCTGACATCCACAACTACTGCCTCTTGGTGAATCATTAGATCTAACGCAACAAAAATCTAACTGCCATTACTATGCAGCACAATTCTCCAAATACTCTGATAACAAAACACAAACGCTATCAAAGACCACTTTCTCTGAAACAAAAACACTAAGTACAATTACCAAGTATCCATCCAATTTGGTTCGGTCCTATGCTGGATTCGTTAGCAGTTCAGCCCATGCTATTCTGCACAATCAGTTCCCGTCATTCCCAAACTGCATCTCACTGAGAGAAACAATTGTCTCT…	0
TR55075|c0_g1	1.95785	3.90391	11.9709	0.00425227	0.0192655	TRET1_BOMMO^TRET1_BOMMO^Q:839-366,H:347-505^41.51%ID^E:4e-35^RecName: Full=Facilitated trehalose transporter Tret1 {ECO:0000303|PubMed:20035867};^Eukaryota; Metazoa; Ecdysozoa; Arthropoda; Hexapoda; Insecta; Pterygota; Neoptera; Holometabola; Lepidoptera; Glossata; Ditrysia; Bombycoidea; Bombycidae; Bombycinae; Bombyx	TR55075|c0_g1|m.7813	408-800[-]	TRET1_DROYA^TRET1_DROYA^Q:1-124,H:709-833^43.2%ID^E:3e-32^RecName: Full=Facilitated trehalose transporter Tret1 {ECO:0000250|UniProtKB:A1Z8N1};^Eukaryota; Metazoa; Ecdysozoa; Arthropoda; Hexapoda; Insecta; Pterygota; Neoptera; Holometabola; Diptera; Brachycera; Muscomorpha; Ephydroidea; Drosophilidae; Drosophila; Sophophora	PF00083.24^Sugar_tr^Sugar (and other) transporter^1-126^E:3.1e-25	0	ExpAA=64.94^PredHel=3^Topology=o23-45i58-80o90-112i	ENOG410XNQK^Transporter	KEGG:dya:Dyak_GE12373`KO:K14258	GO:0016021^cellular_component^integral component of membrane`GO:0005886^cellular_component^plasma membrane`GO:0015574^molecular_function^trehalose transmembrane transporter activity`GO:0015771^biological_process^trehalose transport	GO:0022857^molecular_function^transmembrane transporter activity`GO:0055085^biological_process^transmembrane transport`GO:0016021^cellular_component^integral component of membrane	CGGAAATTTTTCAGCATTTTATTGGGCAGATGAGCAGGTACTGTTATGGAAAAAATATTGTACAGAAGAAATCAGTGTTTAACATATACTTTCAGAAGAAGTCCTGGAAACATTCCAACACGTTTTATTAACAATAATTTCACACATAATGAACTTAATAGCTACAAGAAAATCACAGCACTTGTTTCCAATGTATCTTAGCTTAACTGGCAAGCACTTTGCCTCTATACTGTTCTTTGTTCGGCTTTCACGCGGGCGAGTAGCACCGTGACGTAAGGAGCTTTGTGGTGGCTTTCTAGTGATGTCGAGTGGGTCTGTCGAGTACCCTTGCCAGGCAGAAAATTCTACGGCAGGCGTCCAGCGAGACACAGAAGTGTCGGCAGGTCGGCTGTGCGCCGG…	MAIADVALGTYFYVLEYQDASSLGWLPVTSLVVYIFVYSPGFGALPWAVMGEIFPTNVKALASSLTASFCWMVAFLITKFFSQISSSLGAYTPFWFFSVCCIAAALFVVFLLPETKGRRLEEIQAILNKR*
TR64781|c0_g2	1.95731	2.34072	9.90021	0.00776074	0.0274878	TM11D_RAT^TM11D_RAT^Q:123-848,H:174-417^33.86%ID^E:1e-26^RecName: Full=Transmembrane protease serine 11D;^Eukaryota; Metazoa; Chordata; Craniata; Vertebrata; Euteleostomi; Mammalia; Eutheria; Euarchontoglires; Glires; Rodentia; Myomorpha; Muroidea; Muridae; Murinae; Rattus	TR64781|c0_g2|m.10507	66-851[+]	TRY1_ANOGA^TRY1_ANOGA^Q:14-261,H:29-274^33.46%ID^E:1e-31^RecName: Full=Trypsin-1;^Eukaryota; Metazoa; Ecdysozoa; Arthropoda; Hexapoda; Insecta; Pterygota; Neoptera; Holometabola; Diptera; Nematocera; Culicoidea; Culicidae; Anophelinae; Anopheles	PF00089.26^Trypsin^Trypsin^32-255^E:1.6e-45	sigP:1^20^0.9^YES	ExpAA=17.70^PredHel=1^Topology=i5-24o	COG5640^protease	KEGG:aga:AgaP_AGAP008296`KO:K01312	GO:0005576^cellular_component^extracellular region`GO:0004252^molecular_function^serine-type endopeptidase activity`GO:0008236^molecular_function^serine-type peptidase activity`GO:0007586^biological_process^digestion	GO:0004252^molecular_function^serine-type endopeptidase activity`GO:0006508^biological_process^proteolysis	CCCTGACGGCGCCTGGGCGGTATAAAAGCGGCCTCGCCTCCCGCGCCTCGCACCCTGCCACCACCATGACGCCCGCAGTCCTCATCTTCGCTGCGGCGTGTCTGCTCGTTTCGCCGTCGCTGGCGGCTCCGTGGCTCAGGACTCGCGTCCACGGGCGCATCCTCAACGGCACGCCTGCCGACATCGCAGACTTCCCCTGGATGGCCTTCTTGCAGATCCTGGACAGCACCGGATGCAGCGCATCGATCATCAGCAGCACGTGGGCGCTGACGGCGGCGCACTGCGTTCTCTCGGCCCAGACGCCCACCGCCCACACAAGCTTGCGTGTCGGTTCGTCCAGCCGCGAAAGCGGCGGCGTTCGGCTCGACATCGCCCAGTTGATCATGCATGCGGACTTCC…	MTPAVLIFAAACLLVSPSLAAPWLRTRVHGRILNGTPADIADFPWMAFLQILDSTGCSASIISSTWALTAAHCVLSAQTPTAHTSLRVGSSSRESGGVRLDIAQLIMHADFQYPTQSHPEIEYDVGVVQPSEPFPLGSNVQAVNLPADGYDPPAGLPATVSGWGRTLSEYIPVYLQRADMHVVDRDTCREMLADVAPVTLGMVCAGDPTMATCSGDSGSPLVYGDTQIGIDSWSRPNCISAATAYTSVGYYRAWIRNNTGV*
TR96160|c0_g1	1.95538	4.31983	13.8684	0.00256865	0.0145892	0	0	0	0	0	0	0	0	0	0	0	GATAGGTTAAAATCCTGTCTCACTCCCTTCTCAGCCACTGCTTCCCTTTCGATATCCTTTGAATCTCTCCTGTAACTGTACACTTTATAAGTAACGTTTCGCTCCCTATCTTTTACCCTGATACTTTCAAACTTCCTAAGCGTGTAGGCCGGTATATATTGTCAAATACTTTCTCTGAATCTACAAATGCTACAAATGTATGTTAGCCTTTCTTCAACGTACCTTCTGAGATTAACCATAGGATCAATATAGCCTCGTGTGTCACTGCATTTCTCCGGAATCAGAGCTGGTCTGTCCCGAAGCCGACTTCTTCCAGTTTCTCCTTTCTTACGTCAGTAATTTGTGTTGGTATTTTGCAACTATGACTTACTAAACGGATGGTTCAGTAGTATTTACACT…	0
TR98119|c0_g1	1.95274	4.37627	21.9584	0.000430856	0.00780582	ACSA_DROME^ACSA_DROME^Q:2890-740,H:1-670^69.82%ID^E:0^RecName: Full=Acetyl-coenzyme A synthetase;^Eukaryota; Metazoa; Ecdysozoa; Arthropoda; Hexapoda; Insecta; Pterygota; Neoptera; Holometabola; Diptera; Brachycera; Muscomorpha; Ephydroidea; Drosophilidae; Drosophila; Sophophora`ACSA_DROME^ACSA_DROME^Q:3705-2992,H:1-240^68.75%ID^E:1e-106^RecName: Full=Acetyl-coenzyme A synthetase;^Eukaryota; Meta…	TR98119|c0_g1|m.19217	734-2890[-]	ACSA_DROME^ACSA_DROME^Q:1-717,H:1-670^69.82%ID^E:0^RecName: Full=Acetyl-coenzyme A synthetase;^Eukaryota; Metazoa; Ecdysozoa; Arthropoda; Hexapoda; Insecta; Pterygota; Neoptera; Holometabola; Diptera; Brachycera; Muscomorpha; Ephydroidea; Drosophilidae; Drosophila; Sophophora	PF16177.5^ACAS_N^Acetyl-coenzyme A synthetase N-terminus^26-85^E:2.4e-21`PF00501.28^AMP-binding^AMP-binding enzyme^95-590^E:1.2e-94`PF13193.6^AMP-binding_C^AMP-binding enzyme C-terminal domain^599-677^E:7e-22	0	0	COG0365^Catalyzes the conversion of acetate into acetyl-CoA (AcCoA), an essential intermediate at the junction of anabolic and catabolic pathways. AcsA undergoes a two-step reaction. In the first half reaction, AcsA combines acetate with ATP to form acetyl-adenylate (AcAMP) intermediate. In the second half reaction, it can then transfer the acetyl group from AcAMP to the sulfhydryl group of CoA, …	KEGG:dme:Dmel_CG9390`KO:K01895	GO:0005737^cellular_component^cytoplasm`GO:0003987^molecular_function^acetate-CoA ligase activity`GO:0016208^molecular_function^AMP binding`GO:0005524^molecular_function^ATP binding`GO:0031955^molecular_function^short-chain fatty acid-CoA ligase activity`GO:0019427^biological_process^acetyl-CoA biosynthetic process from acetate`GO:0048149^biological_process^behavioral response to ethanol`GO:00066…	GO:0003824^molecular_function^catalytic activity	TTTTTTTTTTTTTTTTTAAAACTTTAAAATTTTATTTATTTTTTCATTTGCCTATTGTACACAGATATTTACCACAAAAATAGAAAACTTTTGAACATAATTTAATAAGCATAAATTGTACAATCTCAAAATGAGTTAAAAATAGTTGGACGTATGTTTTCATGTTCTGTACAATAAATATTTATCCTGAATATGACCTTGCACATTTAATTACAAAATTGTTCCTGAAATGATATGTATCGTTTCTGCATTGTTATGCATTTGTTGTGTCATTTAAACACAAACCCTCAACAAAGGGCAATGAGATCATTAAAATGACTAAAGTGGATGTCATTTCATCTAAAAGTCCAGCAAAAAATAATATTACATTTATTCCATTTATAGAATACTGAGTGCATT…	MSDSEAVYHPDPALSRRSYIGSMKQYQDMYRRSIDEPEEFWGDMAKQFHWETPVTSKFHSYNFDITKGPISIKWMEGATTNISYNLLDRNVRNGLGDKIAFYWEGNDPEDYSRLTYKKLLEEVCRFANVLKSHGVTKGDRVAIYMPMVLEVVITMLACARIGAVHSIVFAGFSADSLAERMLDSKCKLLVTADGAWRGEKLLHLKEICDNAMERSKKLGHEVETCIVVRHLPRLSASQCQNGCEKANFSPEKRKAYDEKAVFGESWSSLARGFSLAFCCRRKKQKNLHNDKETKVPWKDGRDHWWDDEMEDASSSCYPVWMGAEDPLFMLYTSGSTGKPKGVLHTTAGYLLYAATTFKYVFDYHPGDVYWCTADVGWITGHTYVVYGPLANGATSVMFE…
TR46291|c0_g1	1.95023	1.13167	17.879	0.000995394	0.00994585	0	0	0	0	0	0	0	0	0	0	0	GTAGTTCTGCTTTGTTTGACGTCCTTTGGTCTTTAATGCGTCCTTCATTACACAGAGATTCATATACATGCAAACCATCAATCACACTGCTTGCTTTACGTTAAATAATAAAATGGTACAAAGATAAGGGAAAGAAAGAGACTTTTGCAGTACTTCATTACTTAAATCATTATTAACACAGTTACTGGCTTTAAAAAACCTTTAGTATATGGCTGTTTTTCAGAATGACGCTTTCTCTAGACTCATTCCGTCACGGTGAATTTTTGTTTCTGTTGCAGACGATTAAACTGGGCGACCTGGTGGCAACGAGAATATACAAG	0
TR25802|c0_g1	1.94218	1.22698	24.4126	0.000273263	0.0071856	0	0	0	0	0	0	0	0	0	0	0	TCCCTATAAAATGTTTTACCATTATGCGATCAGCTTTATATCGCCACAGGCTACGTTACATTTTATTTCATTATTTAAAGTAATAATTATTACATGAGTGTTTACTTCACTAACATCAATGAAGAATTCTGTCTGTGTAGAGATTAATGTTAGATGTAAAAGGAATTTCTAGGAGGATCTATGGGAGGGCCTGAAGGCTCCGAACTTGCCGTGTAAGATATACAAACACATACATATTTAAACATGATCATAG	0
TR100696|c0_g4	1.94164	2.51267	15.4391	0.00174179	0.0122174	PE1_ANOGA^PE1_ANOGA^Q:403-65,H:39-151^31.09%ID^E:2e-09^RecName: Full=Peritrophin-1;^Eukaryota; Metazoa; Ecdysozoa; Arthropoda; Hexapoda; Insecta; Pterygota; Neoptera; Holometabola; Diptera; Nematocera; Culicoidea; Culicidae; Anophelinae; Anopheles	TR100696|c0_g4|m.130	2-706[-]	PE1_ANOGA^PE1_ANOGA^Q:102-214,H:39-151^31.09%ID^E:7e-10^RecName: Full=Peritrophin-1;^Eukaryota; Metazoa; Ecdysozoa; Arthropoda; Hexapoda; Insecta; Pterygota; Neoptera; Holometabola; Diptera; Nematocera; Culicoidea; Culicidae; Anophelinae; Anopheles	PF01607.24^CBM_14^Chitin binding Peritrophin-A domain^95-140^E:1.1e-12`PF01607.24^CBM_14^Chitin binding Peritrophin-A domain^169-214^E:1.1e-12	0	0	0	KEGG:aga:AgaP_AGAP006795	GO:0005576^cellular_component^extracellular region`GO:0008061^molecular_function^chitin binding`GO:0006030^biological_process^chitin metabolic process	GO:0008061^molecular_function^chitin binding`GO:0006030^biological_process^chitin metabolic process`GO:0005576^cellular_component^extracellular region	GGCGAACTGGAGGACAAACAAACACCTCATTTCGCAGGGAACTACGTTCCTTCTTGTCATAGGGACAGTCATAGTTGTAAGGCCAATCACAGGCTTGTAAGTCATTGTTCCATATAAGACCATTAGGGCAAGACGCGTTTCTCAAAAGTCCATTGTCACATTCCCAATACAAGGTGCAGTCTTCCTCATTGGGGTAGAACGTAACGTTGAAAATCTCACCTGGCGATGGCTGCGGACAGTCTGGAGTGGCATCTGAAAGGACAATAAGTCCCTTCTTGTCATAGGGACAGTCATAGTTGTAAGGCCAATCACAGGCTTGTAAGTCATTGTTCCATATAAGACCATTAGGGCAAGACGCGTTTCTCAAAAGTCCATTGTCACATTCCCAATACAAGGTGC…	MDLVRMVSYGTTTYRPVIGLTTMTVPMTRWDLLSFQMPLQTVRSHRQARFSTLRSTPMRKTAPYDCPYDKKGLIVLSDATPDCPQPSPGEIFNVTFYPNEEDCTLYWECDNGLLRNASCPNGLIWNNDLQACDWPYNYDCPYDKKGLIVLSDATPDCPQPSPGEIFNVTFYPNEEDCTLYWECDNGLLRNASCPNGLIWNNDLQACDWPYNYDCPYDKKERSSLRNEVFVCPPVR
TR7492|c0_g1	1.91258	3.0333	10.4124	0.00665033	0.0249237	0	0	0	0	0	0	0	0	0	0	0	AGTAGCCGCGCCACGCGAAGGGGACCACTCCAGTCTGCATAAGTGTTGCCTGCACTGAGAAGTTTGCTAATCCTCGCTGATCCTTACTGAACGCCGCTGATTGAGGGCCGACATGGTGTCCCGCCTGCCCCCGCTGGTGCTGCTGGCCGCGCTGCCGCCTGCGCTGCTGCTGCCCGCCGGCACGGGAATGGGAAGTGAGGCCCGCACGACGCCCACCGCGCAGCAGCTGTACGACTCGCTCCCAGAGCCAGA	0
TR78224|c0_g1	1.90047	0.886244	8.554	0.0118794	0.0363371	0	0	0	0	0	0	0	0	0	0	0	CAGTAACATCATTTGTGTTTTTGTCCTTTGGGTCACTGATACAGTAACCAATTGTGAAGTAAATCAAGAGCCCTGAAAAATTACAAAATAACTGTCAATAACTAACTCTAAGGTACAACTTATCTCTTGTAGTGTTTTTCTACCGCACACATTCCATTCATAGTTGCTGCACAAAGTTTTCAACTGCAGATAATTAGTGTGTTGGAGATATCTATTATGATCAGACATAATTCACAGAGCAACACACAGCAATAGAAGTGCCTACCTTTCTCTTACTGTTTATGTCTCCTTATCATCTTTATATTTTATTACTTCTTTCCTGCAAGTGACTGTAGAGATTATTTGTGACAGTACAAAAAGCAAAGCTTAAACTTGAACCAGAAGTATAACTAATACCCT…	0
TR42553|c0_g1	1.90014	7.76655	11.7223	0.00455691	0.0199717	COGS_HYPLI^COGS_HYPLI^Q:1153-1854,H:30-255^40.17%ID^E:9e-42^RecName: Full=Collagenase;^Eukaryota; Metazoa; Ecdysozoa; Arthropoda; Hexapoda; Insecta; Pterygota; Neoptera; Holometabola; Diptera; Brachycera; Muscomorpha; Oestroidea; Oestridae; Hypodermatinae; Hypoderma`COGS_HYPLI^COGS_HYPLI^Q:179-880,H:29-256^39.26%ID^E:6e-35^RecName: Full=Collagenase;^Eukaryota; Metazoa; Ecdysozoa; Arthropoda; Hexa…	TR42553|c0_g1|m.4570	11-898[+]	CTRB1_PENVA^CTRB1_PENVA^Q:1-290,H:5-267^36.55%ID^E:7e-44^RecName: Full=Chymotrypsin BI;^Eukaryota; Metazoa; Ecdysozoa; Arthropoda; Crustacea; Multicrustacea; Malacostraca; Eumalacostraca; Eucarida; Decapoda; Dendrobranchiata; Penaeoidea; Penaeidae; Penaeus	PF00089.26^Trypsin^Trypsin^59-286^E:1e-54	sigP:1^17^0.782^YES	0	0	0	GO:0005615^cellular_component^extracellular space`GO:0004252^molecular_function^serine-type endopeptidase activity`GO:0030574^biological_process^collagen catabolic process	GO:0004252^molecular_function^serine-type endopeptidase activity`GO:0006508^biological_process^proteolysis	CTGACTAGACATGAAACTCCTGTTGGCGTGCGTTCTCCTGTCAGTGGCGGTGGCGCAGGGAGACCCCCAGCGCTATGTGCGTCGCTTCCCCTCGGGCAGGACGAGGCGGCCTATGGACACCGTGGTGCTCAGACCGTCAGGCAGTCACCAAGATGACACAAAGGAGGCGCCCGGAGGGGGACGCATCATCGGCGGCGTCGAGGCGAGCCTGGGCCAGTTCCCGTGGCAGGCGGCGGTGCGGCTGGACGGCTCCGCCTTCTGCGGCGGCTCGCTCATCACGGAGAACTGCGTCCTCACCGCGGCACACTGCGCCTACGGGACAACGTCGTTCACGATAAGCCTGGGCACATTGTCGTCCGCTGAAAATCCAGAGGGGGCGCTGACGCAGACGTCGACGGA…	MKLLLACVLLSVAVAQGDPQRYVRRFPSGRTRRPMDTVVLRPSGSHQDDTKEAPGGGRIIGGVEASLGQFPWQAAVRLDGSAFCGGSLITENCVLTAAHCAYGTTSFTISLGTLSSAENPEGALTQTSTDAVVHPDYWTDGSTTDNDVAVVHLSEMVTLTDTIKTVRLASQVDKTYNYWTATLSGWGKVSDESQTVSPALLYVDLVVIPNEDCEEAFPGAISIDHICTRGATNESPCNGDSGGPLVVLEEDGEITQVGVVSFGSDYGCSLGYPGAYARVTTYLDWINENSVHGGR*
TR55911|c1_g1	1.89138	2.5579	10.5362	0.00641035	0.0244182	0	0	0	0	0	0	0	0	0	0	0	GTTTAATCCACTCTCCTCGTTTGCCTACCCTGTGAATATCTACATCCATACTCCGCAAGCCACTTCTTAATCTCTACATAATTACTTCAACCCCCACCCATTTTAATCTGTTAAATGTAGTCAATCACCTACAAATTTTACTCTATCCACTGTCACCCCCTTCCGCCGTTCGCCGTTACCAAGTTCAGAATAACTTATCGTCTCAAGATTTGTTCTATCAAGCGATCCCTTCCTTCTTTTGATCAAGCCGCACCATAATACGTATTATGTTCTGCCGGCTAGATTCAGTGCCCTCATTACGTATTATGTTCTCCCGGCTAGATTCAGTGCCCTCATTAGGTACTCGATCTATCCATTTAATCGTCAGTATTCTCCTGCTGCAACACATTTCTAAAGCCT…	0
TR96807|c0_g1	1.88933	3.78319	32.35	7.57076e-05	0.00694482	0	TR96807|c0_g1|m.19037	835-1194[-]	0	0	0	0	0	0	0	0	TTCCGTACTTTAAAAATTGTGGGTTGTCGACCTACACAACATTAGTAATTTGGTTCCTACTAGCATTAGCTATCAAGGGCTAAATTTTCGTGACACAATTTTTCTCCATCCTGTACATGTTTATGTCCAGCTTTTTAAATTTTAATTGCGTTATCACTCTGTTGTGAAAGATAATACTTATTGTGTATTTCTGGTGCAGTCTAGATGAACACCACTATTTCCATTGTTCTTCATAAACATTGTAACTTCGTTGATGCCTATAGCTAATTAGAATTTGACGATGGCCTTGTAAGCCGAAAACAGATCCACTGAGTAAATTAATCCTGGACAACATACACGATACTGCGTTTCTTAATTTATTATTGAAAAGAATGGATTTAAATTGCTATAATGTCAGAA…	RYLGSYLVTALYFSSHVRNYATLEIGPEQQDIRITMSEYPHGGDSWRTVATGNYSGVAEPTQLLRIPITYETDPNASYLFEIRYLGSLTYPSYGDIDVSAGPYNGTHNMFILGIDYENP*
TR55097|c0_g1	1.87624	5.11404	29.1362	0.000123475	0.00694482	PE1_ANOGA^PE1_ANOGA^Q:757-476,H:59-152^33.33%ID^E:1e-07^RecName: Full=Peritrophin-1;^Eukaryota; Metazoa; Ecdysozoa; Arthropoda; Hexapoda; Insecta; Pterygota; Neoptera; Holometabola; Diptera; Nematocera; Culicoidea; Culicidae; Anophelinae; Anopheles	0	0	0	0	0	0	0	KEGG:aga:AgaP_AGAP006795	GO:0005576^cellular_component^extracellular region`GO:0008061^molecular_function^chitin binding`GO:0006030^biological_process^chitin metabolic process	0	TTTTTTTTTTTTTTTTTTTTTTTACATAAATAAATTTATTTATTTTACAAATACAAAAATAAATACATACAAATCACAACAACATTTCGTAATGAAATCAGGTTCAATCTCCCACTCAGTTACTGATAAACAGTACATTATTGTAAGTCAGAGAAATGATTAACTGGAATCAGATATATTACTGAGATAAGCCGAGCATTCCCTTCTGTTGGTTCCTGAGGTTACGAGATAATTTTAGCTTACTCAGTATTTGTATTACAAGTTAAATAATTTACACAGTACACTTTTTCGCGCTGGGGTCTCACACCATGTAAATGTCGCAGTTACACTCTCTTACCACATCATTATAGACACCTTTCCAGTAGTTTTGGATGTCGTTTTCATTGGTATAAAACATTA…	0
TR57789|c0_g1	1.86837	4.89403	14.2231	0.00234789	0.0140363	SERA_RAT^SERA_RAT^Q:91-567,H:312-469^34.73%ID^E:2e-08^RecName: Full=D-3-phosphoglycerate dehydrogenase;^Eukaryota; Metazoa; Chordata; Craniata; Vertebrata; Euteleostomi; Mammalia; Eutheria; Euarchontoglires; Glires; Rodentia; Myomorpha; Muroidea; Muridae; Murinae; Rattus	TR57789|c0_g1|m.8836	1-768[+]	SERA_BOVIN^SERA_BOVIN^Q:1-211,H:290-492^32.24%ID^E:3e-12^RecName: Full=D-3-phosphoglycerate dehydrogenase;^Eukaryota; Metazoa; Chordata; Craniata; Vertebrata; Euteleostomi; Mammalia; Eutheria; Laurasiatheria; Cetartiodactyla; Ruminantia; Pecora; Bovidae; Bovinae; Bos	0	0	0	COG0111^Dehydrogenase	KEGG:bta:505103`KO:K00058	GO:0030060^molecular_function^L-malate dehydrogenase activity`GO:0051287^molecular_function^NAD binding`GO:0004617^molecular_function^phosphoglycerate dehydrogenase activity`GO:0006520^biological_process^cellular amino acid metabolic process`GO:0006564^biological_process^L-serine biosynthetic process	0	GAGGCGCAGCGGCGCGTCGCCAGGGAGGCGGCCGAGCAGCTGGTGGCGCTCTCTGCCGCCGTGCCCGCCGCGCAGAGGGCCAGGTTCCAGCTGACAGGTGTCGTGAACGCTCCCGCGCTGTCTGCATCGCTGGACGAGGGGAACCAGCCCTGGCTCCAGCTGGCGAAGGAGCTGGGCTCACTGGCCGCCCGTCTGGTCCAGGGTTCGCTGCCCGGGACGGCCATCAACGTCACAGCCTCTGGCCCTGGTAGTGAGCGGCTGACCTTCGTTGCCACGGCAGCCGTTACTGGTTTGCTGTCTGGGCGCACACCGAATGGGTTGAACCTGGTCAATGCCCCAGCACTGGCGCGCGACATGGGTGTCACAGTGACATCTGAGAAGGCCTCTGCTGGCAGCCAG…	EAQRRVAREAAEQLVALSAAVPAAQRARFQLTGVVNAPALSASLDEGNQPWLQLAKELGSLAARLVQGSLPGTAINVTASGPGSERLTFVATAAVTGLLSGRTPNGLNLVNAPALARDMGVTVTSEKASAGSQGDDTTVTVKIQQASGEVHAVTGTVRADNRPLLLSVDGCVFDGGIALGGGAPLRLFRAASAASALGAVLGALASASASITGVSVAAPVVEPAKGQPADSHAWIAVRTTQRVETRVNIPGVVDV*
TR59609|c0_g1	1.85673	0.895814	26.7934	0.000180862	0.00694482	0	TR59609|c0_g1|m.9204	1927-2226[-]	0	0	0	0	0	0	0	0	AGACTGCCCAGCCGGCGGGTAGCAGCTAACGCCGCGACATCGCTCCCGGGCGATCGTGATTAATGTTCCTGTACAAGCGTCTCTCCGTTACAGTGAAGGACTGGTCATTTTATCGTGGTCGCTGTCTTTCGGCGACTTCATTATGTAGAACTGAAGGTTTCCAAGTCACCGCCGATTAACTTGCCTAGAGCACATCAGGTCAAAAAGTGGATCGCTCTGTAGCTGTACCACACATCCACCTCCACCTACTACGAGCAGCCAATGAAATATTGTCTTCCGCTGGGCACCTAGCTAAACATCAATGTGGACAGCGATATCTTCTCTCCTCCAGACTACACTGTGGCAATAATTTATTGCTGTCCACAGCATCACTTTATGAAGTACAGCGACAGAGAAGGT…	MTHEKLYNNNIRFPVVAKIGHRPLSQTVHCISGSRYLLTLTDDLDVLLFTNKVPQKFTSFLICLGKYYIWKDQTVWANGKYFGNFIWLPNLKEQIVSEE*
TR37975|c0_g1	1.84633	1.07918	9.03151	0.010179	0.0328282	0	0	0	0	0	0	0	0	0	0	0	AGAAACCAAATGTTTGTCTGGCCTCTCAACAGACACCCCTCTGTTGTTGTTGCACCTACACTACAGCTATCTGTATCACTAAGACAAGCAAGCCTCCCTACCAATGGCAAAGTCCATGGTTCATGGGGGGTTTTATAATATAGATGTGCTCTTTTATAACATAGATGTACTAAATCACTGGCAAAGTACTGGTCGTAATTACGCCCAAGCTGCTATACAAATGTAGTGGTTTCGTTACAGGGTCAACATTTTTTGTGAGGTAAAAGTCAAAAATGTTCTTGTTTTGCACATGTACTTTGAATGCAACTATAGCAATATGCTTAAACATGGAACTAATTTTTTGTCACTAAACTACTGAGTATTAACAATGATTTTCTTACAATAAATGTCTATCAGGAA…	0
TR46772|c0_g1	1.84118	2.47994	35.5138	4.83845e-05	0.00694482	DHR11_BOVIN^DHR11_BOVIN^Q:3-275,H:157-251^46.39%ID^E:3e-17^RecName: Full=Dehydrogenase/reductase SDR family member 11;^Eukaryota; Metazoa; Chordata; Craniata; Vertebrata; Euteleostomi; Mammalia; Eutheria; Laurasiatheria; Cetartiodactyla; Ruminantia; Pecora; Bovidae; Bovinae; Bos	0	0	0	0	0	0	COG4221^serine 3-dehydrogenase activity	KEGG:bta:510264`KO:K22970	GO:0005576^cellular_component^extracellular region`GO:0072582^molecular_function^17-beta-hydroxysteroid dehydrogenase (NADP+) activity`GO:0072555^molecular_function^17-beta-ketosteroid reductase activity`GO:0000253^molecular_function^3-keto sterol reductase activity`GO:0004303^molecular_function^estradiol 17-beta-dehydrogenase activity`GO:0000166^molecular_function^nucleotide binding`GO:0006703^b…	0	CAGAAACCGCCATGTACTCTGCCACCAAGCACGCCGTCAATGTGCTTCTCGAAGGCCTCAGGAAGGACCTCGTCGCCAAAAAGAGCAAGATTCGCGTGGGGGCAGTTTCTCCGGGCACTGTGAAGACAGAGCTGCTAAACAACGGGAAATTCTGGCCTAAAGACCTTTACGATAGAGCCCCGTACATGGAACCAGAGGATGTAGCAGAAGCCGTGGTTTACATGTTATCCCAGCATCCTCGAGTACAGGTTCATGACATCGTTTTACGTCCAAACGGCAGTGCTGCATAAGGACAATAATAGTGGAGAATTACAGATGTTGCTATTGTAGACAAGTAACGCTTTGTGATGCTGGATCTTCGTGAACTGTGGCATTATAAAACACATTGACATAATACAG…	0
TR68646|c1_g1	1.83987	8.92473	9.31445	0.00930573	0.0310003	0	TR68646|c1_g1|m.11500	99-557[+]	0	0	sigP:1^18^0.893^YES	0	0	0	0	0	AGCAGACACGGAACTAGCATTGCTGCTACCTCGAGAGAGGCGACCTTCAATAGCGTTGCATCAGGATTCTTAAATCAGTTTTTCTGAAACAGGATCGCATGATGTACGGCTACGTGCTGGTGCTGGTGATGCTGTTGGCTGCTGCCGGCGCTGCGCCTCCGCAGGTTGTGACGGCCAGTACGTCGACGACGGCCAGCGCGCAAGAGGTGTACGACTCGCTGCCCGAGGAAGAGCGCGAGCCATTCCTGGCGTACGAGCTGGCGCTGGGTCTGGACCAGGTGGCGAGGCGGAGCGCGCTGGCCAACATCGGCGATGACTCCCGCTCACTGGCCGACCAGCTGCACGACGCCTACGGCATCCCGTACAACCTTCGCCTCAAGTTCAAGAAGCTGCCGGCCC…	MMYGYVLVLVMLLAAAGAAPPQVVTASTSTTASAQEVYDSLPEEEREPFLAYELALGLDQVARRSALANIGDDSRSLADQLHDAYGIPYNLRLKFKKLPAPNDFDIKMYGWVKKSTDPTFQQMMQLAASGRYCVGSDTCFTLQEPFGNCCPF*
TR99717|c0_g1	1.83863	4.89716	11.2812	0.00516224	0.0215408	0	TR99717|c0_g1|m.19594	726-1106[+]	0	0	0	0	0	0	0	0	GCAAGTAGTAGTGGAATGGCAATTGGAATAACTTTCTGGTAATACCAAGTTCTTGAGTGGCATGACACTTTCTAGGAGCTGGCATTTGGAATTTGTTACCAAGAGGAAATGTTGATGAGGAGCTGGCATTTGGAATTTGTTTGTGACTTGATGTGGGAAGAAATGCAGCCCGCAGAAGTCTCTCTCTTGTTGTGGGAATTAAATGACAGTAACTTCGAGAGACGATTGTTTCACTCAGTGAGACGCAGTGTAGAGAATGAAGAGAACTGGTTGTGCAGAACAACATGTGCTGAGCTGCCTACCGATCCAGCATAGGACCGAAGCAGTTTGGATGGATACTTGGTCTCACTTGTCCATTGGGTGCAGAACTTAAAGTTACTGCCTAAATTTTTTCAACAT…	MPCATVHKVLRKQLHLYSYKVQILQVIKPDVKQRQHEFACEMLNRIDQNPVCLSIVMFSEEATFCVSGTVNKCNAQFWRSLNPHSVREKVRDNPKVNVWCGHMCDKIIGPFFFAEITVTGMAYLDT*
TR25769|c0_g1	1.8324	4.14129	21.5534	0.000465983	0.00789236	FABPM_SCHGR^FABPM_SCHGR^Q:80-469,H:2-133^39.39%ID^E:2e-20^RecName: Full=Fatty acid-binding protein, muscle;^Eukaryota; Metazoa; Ecdysozoa; Arthropoda; Hexapoda; Insecta; Pterygota; Neoptera; Polyneoptera; Orthoptera; Caelifera; Acrididea; Acridomorpha; Acridoidea; Acrididae; Cyrtacanthacridinae; Schistocerca	TR25769|c0_g1|m.1855	74-538[+]	FABPM_SCHGR^FABPM_SCHGR^Q:3-132,H:2-133^39.39%ID^E:1e-21^RecName: Full=Fatty acid-binding protein, muscle;^Eukaryota; Metazoa; Ecdysozoa; Arthropoda; Hexapoda; Insecta; Pterygota; Neoptera; Polyneoptera; Orthoptera; Caelifera; Acrididea; Acridomorpha; Acridoidea; Acrididae; Cyrtacanthacridinae; Schistocerca	PF00061.23^Lipocalin^Lipocalin / cytosolic fatty-acid binding protein family^10-129^E:1.6e-08	0	0	0	0	GO:0005737^cellular_component^cytoplasm`GO:0008289^molecular_function^lipid binding	0	GTCACTGCAGCGTTGTGTTTGTACACCGTGGACTTAAGCAGCTCGTTTTCAAAGTGTATATACCATAACAGCGATGTCTCTGGAGGAATGTCTGGGTCGCAGGTACAAGTTAGTGAAGAGTGAAAACTTCAACGAATACATGAAAGCAATCGGCATTGGCTTCTTGTCGCGGAAGATTGGCAACAGTGTGCGTCCTGCCATGATCCTGATGAGGGCTGGAAACAAGTACACGATGATATCGGCGACTGGAATCTTCACGACGTCCAACTCGTTCCGGCTGGGTGAAGAGAAGTGGGTGAAGACCGAGGACGGCCGGCGAGTCATCCGTACCTGTACGCTGGAGGGCAACACTCTTACCTGGGTGGAGAGGGGGCACAAACTCGTCACCTACGTGTTCGA…	MSLEECLGRRYKLVKSENFNEYMKAIGIGFLSRKIGNSVRPAMILMRAGNKYTMISATGIFTTSNSFRLGEEKWVKTEDGRRVIRTCTLEGNTLTWVERGHKLVTYVFEFTTEELKMTIMVDNVVCTRIFEAIRGMEVGAYGATPPHVPQVCKK*
TR99717|c1_g2	1.8197	3.55572	13.7251	0.00266459	0.0149407	0	0	0	0	0	0	0	0	0	0	0	AACACTCGTCATATACCCAATTAACACACACATCCCGTGTCTAGTAGTCATCATTAAGTAAGCTATGTCATTTTTCATAGTAGCACTCATCCCCCACCTAGTACTAAACTACTCATGAACATACAAAATACTAAACTCGGAGAGAACAACGCTATTCTCCACTAGCTCTGTACCACTTCTCACTATATAAAGATGCAACGCCCTGTGCTAAACATAGTACACCCAACTGCAAATAATCACACTAAACAGATCTGACTATGTCAAAAGTACAAATTTAACACTCTTAGCTCTGCTCTCTCAAATTTCTCCAACGCTTCGCCGCATGAAAACCTCACTGTCTTAATCCGCTATCGGTGAAATCGATAATATTCACTAGCATCGATCATCCTGTCAAAGCAA…	0
TR33953|c0_g1	1.81737	0.638875	12.948	0.00326345	0.0164963	0	0	0	0	0	0	0	0	0	0	0	CTTCCCTCTGTCTTCGTCGTCTCTAATAATTTATTTTTCTACTTCTCTACTGAGATCCCATCTCCCGAAGACGGTAGCTTGGCAAACTGGACCATACTCCAATTGCTGAAGAATTCTGCTCGCAGAGAAATGCATTTCATTCTTACAAAACGATTATTTCCAAATCGTCTGATCTATACTGATAGCTGGAAAGAAGTGTAATGTTGTGTCTTCTACTACGTTATTATAAATATGGTGCAGTGTAATGTGAGTGCTTTGGAGACTCAACACATTTAACGTTCTTGTACATGCCGATGGAACCTGGTATAATTTTTATTATACTGAAACTAGTTTCGACAACATTGGTTGGCAACATCTGTCAGACCTTAGAATTATAAAATAGTCTGTATCACGCGTCCA…	0
TR93865|c0_g1	1.81152	2.0353	13.2965	0.00297741	0.0157813	0	0	0	0	0	0	0	0	0	0	0	TATTTGCGCGCCTTTTATATTACCCACATTCGAAGCTTGCTACTTTGAGACATTCTAACGTTCTTCAAACTTGATTGAAGTAGATTAAATCGTTAGGTTAATTTTTGTTGCTGTAGAATAAAGGCAATGGGATTAGTGCTGTGACAGTGTGATGTTAGTTCTTTCTGGTCTATGGAGGTGATGGCTGTGGGGAGTTGTTCTTATTACAGTACTTGTGGATAGAGTAAATTCTTAGAACTGGGGGCGGTATTAAAGGAAAAATGTCTGATTTTCACATTGGAAAATAATTCGAGTAAATGTGGGAGGATAGGACAGCAGCCAAGCTGAAAGCATATGGCCCGGAACAGTCGTCCTCGGTGAAAATACTTGGGTTGTATGAAGGCTAGATCATGTGGGTGA…	0
TR91535|c3_g1	1.80927	5.59655	11.1978	0.00528685	0.0217854	MYRO1_BREBR^MYRO1_BREBR^Q:177-851,H:4-227^59.11%ID^E:2e-139^RecName: Full=Myrosinase 1 {ECO:0000303|PubMed:11804799};^Eukaryota; Metazoa; Ecdysozoa; Arthropoda; Hexapoda; Insecta; Pterygota; Neoptera; Paraneoptera; Hemiptera; Sternorrhyncha; Aphidomorpha; Aphidoidea; Aphididae; Macrosiphini; Brevicoryne`MYRO1_BREBR^MYRO1_BREBR^Q:946-1677,H:223-463^46.15%ID^E:2e-139^RecName: Full=Myrosinase 1 {ECO…	TR91535|c3_g1|m.17610	1084-1722[+]	MYRO1_BREBR^MYRO1_BREBR^Q:1-198,H:268-463^45.5%ID^E:8e-49^RecName: Full=Myrosinase 1 {ECO:0000303|PubMed:11804799};^Eukaryota; Metazoa; Ecdysozoa; Arthropoda; Hexapoda; Insecta; Pterygota; Neoptera; Paraneoptera; Hemiptera; Sternorrhyncha; Aphidomorpha; Aphidoidea; Aphididae; Macrosiphini; Brevicoryne	PF00232.18^Glyco_hydro_1^Glycosyl hydrolase family 1^17-197^E:2.9e-47	0	0	0	0	GO:0102799^molecular_function^glucosinolate glucohydrolase activity`GO:0046872^molecular_function^metal ion binding`GO:0019137^molecular_function^thioglucosidase activity`GO:0005975^biological_process^carbohydrate metabolic process	GO:0004553^molecular_function^hydrolase activity, hydrolyzing O-glycosyl compounds`GO:0005975^biological_process^carbohydrate metabolic process	TGGAATTTTACTCGTTTGTACATACCGCTGTATTTCATTGCGAGAATTTTAAGATAACTTTATTTCTGTTTTCAGGTTGAAATTTGGCCTGTACCACGCGAGTCGACGCAGACATGCTGCTGCTGCTCCTGCTGGTGGTTGGCAGCTGCGCCACAGCCGCGTCTGCGCAGAACGCCAGCTTCCCCGATGACTTCCTTTTCGCCGTCTCCACCGCCGCCTATCAGATAGAGGGCGCCTGGGACGCCGACGGCAAGGGGGAAAACATCTGGGACCGGATGACTCACGAGCACCCAGACTACGTGGATGACGGATCTAACGGCGATGTGGCCTGCGATTCTTATCACAAGTACGAAGAGGACGTGGAGATGATCAAGTCCCTAGGGGTTAACATTTACCGTT…	MKERIYNNSIKDGIWISRLPQFTAQEIADLKGSADYFSLNHYTTNLAEDGEKADEYPSHEWDTGVVTSFDSSWPNSSYNIMKVVPWGFRGLLKWIANEYDTKMGIFITENGFADTGEINDTGRQNYYTSYLREMLNAMYLDGVNVIGYTAWSLLDNYEWMRGYTLKFGLYHVDFNDPNRTRTPKASAAMFREIVATHRLPDSGATMTSSHFV*
TR49189|c0_g1	1.80714	5.53397	10.7005	0.00610735	0.0237107	CEL_MOUSE^CEL_MOUSE^Q:44-1414,H:96-550^33.97%ID^E:2e-70^RecName: Full=Bile salt-activated lipase;^Eukaryota; Metazoa; Chordata; Craniata; Vertebrata; Euteleostomi; Mammalia; Eutheria; Euarchontoglires; Glires; Rodentia; Myomorpha; Muroidea; Muridae; Murinae; Mus; Mus	TR49189|c0_g1|m.6103	2-1432[+]	CEL_MOUSE^CEL_MOUSE^Q:15-471,H:96-550^33.97%ID^E:8e-72^RecName: Full=Bile salt-activated lipase;^Eukaryota; Metazoa; Chordata; Craniata; Vertebrata; Euteleostomi; Mammalia; Eutheria; Euarchontoglires; Glires; Rodentia; Myomorpha; Muroidea; Muridae; Murinae; Mus; Mus	PF00135.28^COesterase^Carboxylesterase family^14-466^E:1.3e-112`PF07859.13^Abhydrolase_3^alpha/beta hydrolase fold^44-187^E:8.1e-07	0	0	COG2272^Carboxylesterase	KEGG:mmu:12613`KO:K12298	GO:0009986^cellular_component^cell surface`GO:0005737^cellular_component^cytoplasm`GO:0005829^cellular_component^cytosol`GO:0005615^cellular_component^extracellular space`GO:0005794^cellular_component^Golgi apparatus`GO:0005887^cellular_component^integral component of plasma membrane`GO:0043231^cellular_component^intracellular membrane-bounded organelle`GO:0045121^cellular_component^membrane raft…	GO:0016787^molecular_function^hydrolase activity	AGGATCTCCATGCCCCCAGGTGAATGACTCCGGTGTATACCTTGGCAAGGAAGATTGCCTTTATCTCAACGTGTATGTTCCACATGCGATGAGGAGAACGTTCGGAAGCAGGAACGACCTGCTCAAGGTGATGGTGTGGATCCACGGCGGCGGATTCGTGCAGGGCGAGGGCGGCCGCACCCAGTTCGGACCAGACTTTCTCATCGAACGTGGCATCATACTGGTCACGTTCAACTACCGACTCGGTGTGCTCGGGTTCCTCAGCATGGAGTCTGAGTCGGCGCCGGGCAACTACGGCCTGAAGGACCAGACCCTCGCTCTCCAGTGGGTGCGGCGCAACATCCGCTCCTTCGGCGGAGACCCTGATGACGTCACGCTGTTCGGCGAGAGCGCGGGTGC…	GSPCPQVNDSGVYLGKEDCLYLNVYVPHAMRRTFGSRNDLLKVMVWIHGGGFVQGEGGRTQFGPDFLIERGIILVTFNYRLGVLGFLSMESESAPGNYGLKDQTLALQWVRRNIRSFGGDPDDVTLFGESAGAASVHYHLLSNSSRGLFTRAIAASASALSPWAFTRSPRQRARSLAAALGLPSNASDQQALHLLSRVPPWLLLTHTRAALSKRDNASLFTFVFVPSVEPIHDGAFLTEEPSLLLLKGQFQHVPYITGVNSKEGNFFVSAAAGGSLSTNESLANFNKNFVGIIGPDIRDNVEFNQNTIAEMARGFYYGNSPITRKKDLNTSNLLSDLFFEEPVDTVVRIMAAASHESVRYYRFSFKGPNSGVPDEPGVQHAEDLKYLFRTTLSKQNLDR…
TR63230|c0_g1	1.8052	4.60505	41.2957	2.29603e-05	0.00694482	AMPN_CHICK^AMPN_CHICK^Q:610-23,H:401-597^38.12%ID^E:6e-33^RecName: Full=Aminopeptidase Ey {ECO:0000303|PubMed:9734335};^Eukaryota; Metazoa; Chordata; Craniata; Vertebrata; Euteleostomi; Archelosauria; Archosauria; Dinosauria; Saurischia; Theropoda; Coelurosauria; Aves; Neognathae; Galloanserae; Galliformes; Phasianidae; Phasianinae; Gallus	TR63230|c0_g1|m.10157	2-610[-]	AMPN_CHICK^AMPN_CHICK^Q:1-196,H:401-597^38.12%ID^E:6e-33^RecName: Full=Aminopeptidase Ey {ECO:0000303|PubMed:9734335};^Eukaryota; Metazoa; Chordata; Craniata; Vertebrata; Euteleostomi; Archelosauria; Archosauria; Dinosauria; Saurischia; Theropoda; Coelurosauria; Aves; Neognathae; Galloanserae; Galliformes; Phasianidae; Phasianinae; Gallus	PF01433.20^Peptidase_M1^Peptidase family M1 domain^1-145^E:1.3e-33	0	0	0	KEGG:gga:395667`KO:K11140	GO:0005737^cellular_component^cytoplasm`GO:0005793^cellular_component^endoplasmic reticulum-Golgi intermediate compartment`GO:0009897^cellular_component^external side of plasma membrane`GO:0070062^cellular_component^extracellular exosome`GO:0016021^cellular_component^integral component of membrane`GO:0005886^cellular_component^plasma membrane`GO:0070006^molecular_function^metalloaminopeptidase ac…	GO:0008237^molecular_function^metallopeptidase activity`GO:0008270^molecular_function^zinc ion binding	GGCTAGTGTTCTCCAGCTGATCCGCGGTCGTTGCCCAAGTCAGCGGCACGATCCACTGCGGGCTGTCCGTCATCTCCTCAGTCAACAGGAAGCGGGACTGTTTGACGGTGGCGGTGTTGGCCTCGCGGTCCCGCGTGACTGTGAGCACTGGGTAGCCGGCGTTGTTGGTCCATGAGTGGAGAATGTCGAGAAGGTTGTTGCCCCCGAAGCTGAGATTCGCCTCAGTCGCTGCCTCCACTAGAGAGGTGAGCAGGTCGTCCTGCATGGCCGCTTCGAACTTCATTTTTGTCAGGTACTTGTTGAGGCCTTTCTTCCACACTTCGGTTCCGAGAATGTGTTCTATCATCCTTAGTACTGAGCCAGCTTTGGCGTAAGCGATGTTGTCGAACTGGTCCGAGA…	LVGPAWWNVLWLNEGFATFFEYFNTHAVETEWRLDEQFVLDELQLGLSADCRLSTRAMTPQEDAVLTQAQISDQFDNIAYAKAGSVLRMIEHILGTEVWKKGLNKYLTKMKFEAAMQDDLLTSLVEAATEANLSFGGNNLLDILHSWTNNAGYPVLTVTRDREANTATVKQSRFLLTEEMTDSPQWIVPLTWATTADQLENTS
TR21632|c0_g1	1.79933	0.914881	17.3014	0.00113137	0.0103761	0	0	0	0	0	0	0	0	0	0	0	ATGGGGACTTGTCACGAGTGAGGTGGAAGCAGGTTGTGAAGGTGTGCAGCTGCATCAGTAAATCGGTCGACCATGAAACTTGTTTATTTCTTGGCGTTTCTCTCTTTATGCATTTCATTAAATGCACACCCTGTGTCGGAACCGACCGAGGTTCCTCCTCCAGGAGGTCTCGAAGACGCGGATGTAAATGACGAAGCTGTCAAGAATGCTGCAGCTTTTGCAGTAGGTGAAATCGATAAGCAACAAGATTCGGAGTACAAGCTAG	0
TR45689|c0_g1	1.79929	3.84935	16.2502	0.00143812	0.0113274	DHR11_CHICK^DHR11_CHICK^Q:592-11,H:1-198^54.04%ID^E:2e-53^RecName: Full=Dehydrogenase/reductase SDR family member 11;^Eukaryota; Metazoa; Chordata; Craniata; Vertebrata; Euteleostomi; Archelosauria; Archosauria; Dinosauria; Saurischia; Theropoda; Coelurosauria; Aves; Neognathae; Galloanserae; Galliformes; Phasianidae; Phasianinae; Gallus	TR45689|c0_g1|m.5193	2-592[-]	DHR11_CHICK^DHR11_CHICK^Q:1-194,H:1-198^54.04%ID^E:8e-62^RecName: Full=Dehydrogenase/reductase SDR family member 11;^Eukaryota; Metazoa; Chordata; Craniata; Vertebrata; Euteleostomi; Archelosauria; Archosauria; Dinosauria; Saurischia; Theropoda; Coelurosauria; Aves; Neognathae; Galloanserae; Galliformes; Phasianidae; Phasianinae; Gallus	PF00106.25^adh_short^short chain dehydrogenase^8-196^E:8.2e-44`PF08659.10^KR^KR domain^9-170^E:2.2e-09`PF01370.21^Epimerase^NAD dependent epimerase/dehydratase family^9-103^E:1.4e-05`PF05368.13^NmrA^NmrA-like family^10-73^E:1.1e-05`PF13561.6^adh_short_C2^Enoyl-(Acyl carrier protein) reductase^13-196^E:3.8e-32`PF13460.6^NAD_binding_10^NAD(P)H-binding^13-94^E:9.2e-07	0	0	COG4221^serine 3-dehydrogenase activity	KEGG:gga:395172`KO:K22970	GO:0005576^cellular_component^extracellular region`GO:0072582^molecular_function^17-beta-hydroxysteroid dehydrogenase (NADP+) activity`GO:0072555^molecular_function^17-beta-ketosteroid reductase activity`GO:0000253^molecular_function^3-keto sterol reductase activity`GO:0004303^molecular_function^estradiol 17-beta-dehydrogenase activity`GO:0000166^molecular_function^nucleotide binding`GO:0006703^b…	GO:0003824^molecular_function^catalytic activity`GO:0050662^molecular_function^coenzyme binding	CGTGGATCTCTGTCCTCACGTAACCCGGAGATATTTGCCCACACCGTATTTTGCTCTTCCTGGCGACGAGGTCCTTCCTCAGTCCCTCTAGCAGGGCCGTGACAGCATGCTTGGCTGCGCCGTACATCGCTATATCGGAGCCGCCAGGCGGTATGTGGCCCAACACACTGTTGATGTGGATGATGAACCCATCATCGACGCCCCTCTTCACCATGCTCTGGAATGCCTCCCTAGTGCAGATGGATAGCCCCAGAACATCCACGTCCAGGATTCGCTTCCAGTCAGCTGTCTTTGCACTTGTTAGAGGCAATTCCCCGATGACACCAGCGTTGTTGACGAGAATATCTACGCCTCCCAAGTTGTCCTCGATCCACTTGAAGGCGGACAAGATGCTCTCCT…	MERYTGRVALVTGASSGIGAAIAQALVRKGLKVVGLARRVDRVKALELKDAPGKLYALQGDVSSEESILSAFKWIEDNLGGVDILVNNAGVIGELPLTSAKTADWKRILDVDVLGLSICTREAFQSMVKRGVDDGFIIHINSVLGHIPPGGSDIAMYGAAKHAVTALLEGLRKDLVARKSKIRCGQISPGYVRTEIH
TR59587|c0_g1	1.78393	5.22606	16.3158	0.00141636	0.0112773	C1139_DROME^C1139_DROME^Q:472-1611,H:22-394^47.89%ID^E:3e-105^RecName: Full=Proton-coupled amino acid transporter-like protein CG1139 {ECO:0000305};^Eukaryota; Metazoa; Ecdysozoa; Arthropoda; Hexapoda; Insecta; Pterygota; Neoptera; Holometabola; Diptera; Brachycera; Muscomorpha; Ephydroidea; Drosophilidae; Drosophila; Sophophora	TR59587|c0_g1|m.9178	229-1800[+]	C1139_DROME^C1139_DROME^Q:82-461,H:22-394^47.89%ID^E:6e-123^RecName: Full=Proton-coupled amino acid transporter-like protein CG1139 {ECO:0000305};^Eukaryota; Metazoa; Ecdysozoa; Arthropoda; Hexapoda; Insecta; Pterygota; Neoptera; Holometabola; Diptera; Brachycera; Muscomorpha; Ephydroidea; Drosophilidae; Drosophila; Sophophora	PF01490.18^Aa_trans^Transmembrane amino acid transporter protein^102-460^E:4.8e-61	0	ExpAA=182.75^PredHel=7^Topology=o133-155i195-217o232-251i256-278o298-320i333-355o436-458i	COG0814^amino acid transport	KEGG:dme:Dmel_CG1139`KO:K14209	GO:0016021^cellular_component^integral component of membrane`GO:0005886^cellular_component^plasma membrane`GO:0015171^molecular_function^amino acid transmembrane transporter activity`GO:0003333^biological_process^amino acid transmembrane transport`GO:0040008^biological_process^regulation of growth	0	AAGCATCAGTTCACCCAAGATGATTGATTAATCTAAACACAGTTCAGACCCTTCAAAGTGACTTACTTGGAATTTTTAGCATGTTAACAGTTGGTCTTACAATGGCAGCCATATTTTTTAAGAAATAATGTTAACTACCTATTTTTTTCCTGTGGAGTTAGTATTACAGCCTAAGAGCGGCTTCCTTCCCGCCAGATACTGTGGTACGCTCGGTGGAGGCAGATTAGCATGGTACTCACAGCTGTTGGTCTTGGTCGGCAGAGCACGACGACATCATCTTACGGCACCAACCAGCACACCGTCGTCAACGTGAGCGACCTCAAAGGCGCCGCCTGCAATGTTAACGCCGCCAAGACGCCGCAGCAGCAACAGGCACCGCCTCCCGCTTACAACAGTATC…	MVLTAVGLGRQSTTTSSYGTNQHTVVNVSDLKGAACNVNAAKTPQQQQAPPPAYNSISSKEAEAAGYGASTGIFTVGDALSRKASAAQQEYKPHLERDVEKPITNMETLLHLLKGSLGTGILAMPNAFMHAGYAVGIVGTFIIGVLCTYCIHLLVKAQYELCRRRRIPSLGYQETAMAALEEGPRFLRPLAPYTGHIVNIFLLIYQLGTCCVYVVFVSSNIKSVVDEYYSGLDLRMYMLILLLPLIMINMVRNLKLLAPFTTLANLLTLIGFGITLYYLVNSAPTLADKEPFGTLKGLPLFFGTVLFALEAIGVILPLENSMKTPKSFGGSLGVLNRAMVVIITLYIGIGFFWLHEIWGYMKYGSCVKGSITLNLPNEEILAQCVKIMLAISIFITHSL…
TR39781|c0_g1	1.78063	4.4911	26.6696	0.000184667	0.00694482	0	TR39781|c0_g1|m.3498	1-318[-]	0	PF06757.13^Ins_allergen_rp^Insect allergen related repeat, nitrile-specifier detoxification^1-54^E:4.7e-13	0	0	0	0	0	0	GACGGGGATGAGGGCCAGGAAGTCGTTCAGGTCATCCTGCAGGTTGCGGCTGGATTTTTTTGTGGGGAAGCGCTGGATCTTCTTGACTGGTACAATAGGTTTCAGTTTCAAAGAGCCGGAATCAGCCCAACCGAAGAGATTTCTGAAGAAATCCATGATGGCATCCACATCGATGCCGGCATCCCTCAGCATCTGGATCAAGTTCTGCATAGCATCCAGCTCCAAAACACGCAGAACCAGTTGATGGAACTCGTCCGAGCTGAGCCTGTTGATGAGTTCAGCAAAGTCGGGGCTGGTCTCCAGCTTCTCGTTGTAGAGAG	LYNEKLETSPDFAELINRLSSDEFHQLVLRVLELDAMQNLIQMLRDAGIDVDAIMDFFRNLFGWADSGSLKLKPIVPVKKIQRFPTKKSSRNLQDDLNDFLALIPV
TR92205|c0_g1	1.76842	0.489376	10.9803	0.00562895	0.0226173	0	TR92205|c0_g1|m.17823	718-1239[-]	EST1_PIG^EST1_PIG^Q:46-172,H:424-550^28.79%ID^E:5e-06^RecName: Full=Liver carboxylesterase;^Eukaryota; Metazoa; Chordata; Craniata; Vertebrata; Euteleostomi; Mammalia; Eutheria; Laurasiatheria; Cetartiodactyla; Suina; Suidae; Sus	PF00135.28^COesterase^Carboxylesterase family^13-158^E:2.3e-16	0	0	COG2272^Carboxylesterase	KEGG:ssc:100736962	GO:0005788^cellular_component^endoplasmic reticulum lumen`GO:0005615^cellular_component^extracellular space`GO:0052689^molecular_function^carboxylic ester hydrolase activity`GO:0080030^molecular_function^methyl indole-3-acetate esterase activity`GO:0004771^molecular_function^sterol esterase activity`GO:0004806^molecular_function^triglyceride lipase activity`GO:0016042^biological_process^lipid cat…	0	GAGGAGCAGGGACTACTATAGGAGGCACATGAGCACTGCTCCAGTAGTTACATGCTTCCTCGAGTGACACCTGCTCCTCGCCATCGTCAGCAGACTCCCAATCAAGTAAGCGGTCCGATGATCACCGGGACAGGTGTCGAAACCTGCCAACAGTAAATAAATAAGCATCTTTATGCGGTTGGGATTGTTTTATTACAAAAAAAATTAGCATTATGATTCTATCACAGAAAAATAAAGTAAGAATTATCACAGTGAAATCAAGAAACTTTATTATACAATTGCTGTAGTTTGAGTAACAGTAAGGATTTATCTCCGCTTAAAATGGTACGGGCTTTAAATGCGTGAGGTTTTGATTCTCTTATTTGACTCTACACCCATCATGTTTGAATTTTTGTAATG…	CDIRLPTREEQLAAARSVKEFYYNGSDITLQENYTTALFSSHLFFVEGVDTVTRSMARYSSEPVFYYEFAFNGALSQYPGGPGASHGDDTLYLFPASQPDPKSDSALIRDQMTAMFANFAKYNNPTPELDALVTEAWPEYDESSRSYLVLAEPLRTASDMFGPYMTFWHDLLP*
TR95798|c0_g1	1.76211	2.98446	19.7087	0.000674424	0.00874753	SDR1_AEDAE^SDR1_AEDAE^Q:2-268,H:159-242^49.44%ID^E:6e-16^RecName: Full=Farnesol dehydrogenase {ECO:0000305};^Eukaryota; Metazoa; Ecdysozoa; Arthropoda; Hexapoda; Insecta; Pterygota; Neoptera; Holometabola; Diptera; Nematocera; Culicoidea; Culicidae; Culicinae; Aedini; Aedes; Stegomyia	0	0	0	0	0	0	COG4221^serine 3-dehydrogenase activity	KEGG:aag:23687722`KO:K15890	GO:0047886^molecular_function^farnesol dehydrogenase activity`GO:0006718^biological_process^juvenile hormone biosynthetic process	0	GATGTACGGCGCAGCCAAGCATGCTGTCACGGCCCTGCTAGAGGGACTGAGGAAGGACCTCGTCGCCAGGAAGAGCAAAATACGGTGTGGGCAAATATCTCCGGGTTACGTGAGGACAGAGATCCACGACTTCCTTCCAAAGTATACCCCTGAAGTTCGAGAGAAGACACCGTGGATGGAATCCGAGGACATAGCAGAAGCTGTGGTCTACATGTTGTCGCAGCATCCCCGTGTCCAGGTGCATGATATCATCATTCGTTCTGTGGGAAGTGATTTGTAATATTTTTTTTCATTATAATAAACTGCGCACAGCACTGCAGTCGTCTTCACGAAAATAATTGATTTTTACTAATTCCTGTAAGCAACTGTTGCACTGTGTTTCTATCATCAAGTTGTTAA…	0
TR41238|c0_g1	1.75516	1.72272	14.6012	0.00213645	0.0134508	UGT3_PLEPL^UGT3_PLEPL^Q:2777-3031,H:233-316^45.35%ID^E:9e-13^RecName: Full=UDP-glucuronosyltransferase;^Eukaryota; Metazoa; Chordata; Craniata; Vertebrata; Euteleostomi; Actinopterygii; Neopterygii; Teleostei; Neoteleostei; Acanthomorphata; Carangaria; Pleuronectiformes; Pleuronectoidei; Pleuronectidae; Pleuronectes`UGT3_PLEPL^UGT3_PLEPL^Q:3023-3157,H:390-434^57.78%ID^E:2e-07^RecName: Full=UDP-gl…	TR41238|c0_g1|m.4002	2855-3304[+]	UD12_MOUSE^UD12_MOUSE^Q:53-117,H:441-506^51.52%ID^E:8e-13^RecName: Full=UDP-glucuronosyltransferase 1-2;^Eukaryota; Metazoa; Chordata; Craniata; Vertebrata; Euteleostomi; Mammalia; Eutheria; Euarchontoglires; Glires; Rodentia; Myomorpha; Muroidea; Muridae; Murinae; Mus; Mus	PF00201.18^UDPGT^UDP-glucoronosyl and UDP-glucosyl transferase^1-59^E:8.6e-08`PF00201.18^UDPGT^UDP-glucoronosyl and UDP-glucosyl transferase^57-125^E:6.3e-19	0	ExpAA=22.71^PredHel=1^Topology=o99-121i	COG1819^Transferase	KEGG:mmu:22236`KO:K00699	GO:0005783^cellular_component^endoplasmic reticulum`GO:0005789^cellular_component^endoplasmic reticulum membrane`GO:0016021^cellular_component^integral component of membrane`GO:0043231^cellular_component^intracellular membrane-bounded organelle`GO:0019899^molecular_function^enzyme binding`GO:0015020^molecular_function^glucuronosyltransferase activity`GO:0046982^molecular_function^protein heterodi…	GO:0016758^molecular_function^transferase activity, transferring hexosyl groups	TCCGCTTCTAGCGCAGGCGCAGTAGCCTGGACCCGGGGTATAAAGGAGCTTGCGTCTCTGATGTTTATTCACTTCTGACGTGATTGTGTCTCAGCGATCGCAGCTGAAGATGGCGGCTAGATCGATCGCCGAAATACCGTGTATTGAAGACTATTATATCCGGTAGCGTACCCGCGAAGGACATAATCATTGTTTCTGGTTTAATGGAAAGCCTATCTTCGTTCCTGCGAAAACATAATTTGCGAAACTCGGATGTAGCACCTCGCATGCTTCTATGTGCGACAGCGACAAATTGTTGAGCTCACAAAAACATGAAGCTGTTTCCGCCGGCTGTACTACGCGCCCAGGCAGGACGCCCTGGTGCGCAGACACGTGGCCGGCCCCGCGCTGCGTCATCGA…	MPDEKRAAFLTAFSQLKQRVLWKWEIEDLPGKPENLKVSKWLPQSDILAHKNMKLFVFHDRPRAPLEEAVFWTEYVVRHGGAPHLRSPALHLSWYQLWLLDVAAAVVAAAVAVMAILAVAVRAAADRLSSKRLAAALRRAAIVGSKKHM*
TR33586|c0_g1	1.75403	1.12711	23.293	0.000335005	0.00733976	MYRO1_BREBR^MYRO1_BREBR^Q:344-3,H:14-127^66.67%ID^E:6e-42^RecName: Full=Myrosinase 1 {ECO:0000303|PubMed:11804799};^Eukaryota; Metazoa; Ecdysozoa; Arthropoda; Hexapoda; Insecta; Pterygota; Neoptera; Paraneoptera; Hemiptera; Sternorrhyncha; Aphidomorpha; Aphidoidea; Aphididae; Macrosiphini; Brevicoryne	TR33586|c0_g1|m.2153	3-344[-]	MYRO1_BREBR^MYRO1_BREBR^Q:1-114,H:14-127^66.67%ID^E:6e-49^RecName: Full=Myrosinase 1 {ECO:0000303|PubMed:11804799};^Eukaryota; Metazoa; Ecdysozoa; Arthropoda; Hexapoda; Insecta; Pterygota; Neoptera; Paraneoptera; Hemiptera; Sternorrhyncha; Aphidomorpha; Aphidoidea; Aphididae; Macrosiphini; Brevicoryne	PF00232.18^Glyco_hydro_1^Glycosyl hydrolase family 1^1-114^E:8e-55	0	0	0	0	GO:0102799^molecular_function^glucosinolate glucohydrolase activity`GO:0046872^molecular_function^metal ion binding`GO:0019137^molecular_function^thioglucosidase activity`GO:0005975^biological_process^carbohydrate metabolic process	GO:0004553^molecular_function^hydrolase activity, hydrolyzing O-glycosyl compounds`GO:0005975^biological_process^carbohydrate metabolic process	GCTTGCGGTAGGTCCCAGTGGTACATCGTCACCATTGGTTCGATGCCATTCTCCAGCAACAGATTGATGAGATTGTTGTAGTAATCAATCCCTGCCTGATTAATCACGTCCAGGTCCCCAGTAGGCAGTATACGAGACCATGAGATGGAGAAACGGTAGACCTTTGCCCCCAGATCCTTGAGAGCCTCCACGTCCTCGGCATACTTGTGGTACGAGTCACAGGCTACGTCTCCATTCTCGCCGTTGTTGCCGTACTCTGGATGTTCGTGCAGCATGTGGTCCCATATGTTCTCTCCTTTGCCATCTTCGTTCCAGGCGCCCTCTATCTGGTAGGAGGCAGTGGC	ATASYQIEGAWNEDGKGENIWDHMLHEHPEYGNNGENGDVACDSYHKYAEDVEALKDLGAKVYRFSISWSRILPTGDLDVINQAGIDYYNNLINLLLENGIEPMVTMYHWDLPQ
TR12891|c0_g1	1.74789	1.67795	16.4008	0.00138874	0.0112029	ABCG1_HUMAN^ABCG1_HUMAN^Q:5-550,H:36-215^42.7%ID^E:8e-34^RecName: Full=ATP-binding cassette sub-family G member 1 {ECO:0000305};^Eukaryota; Metazoa; Chordata; Craniata; Vertebrata; Euteleostomi; Mammalia; Eutheria; Euarchontoglires; Primates; Haplorrhini; Catarrhini; Hominidae; Homo	TR12891|c0_g1|m.1634	2-553[+]	ABCG1_HUMAN^ABCG1_HUMAN^Q:2-183,H:36-215^42.7%ID^E:7e-34^RecName: Full=ATP-binding cassette sub-family G member 1 {ECO:0000305};^Eukaryota; Metazoa; Chordata; Craniata; Vertebrata; Euteleostomi; Mammalia; Eutheria; Euarchontoglires; Primates; Haplorrhini; Catarrhini; Hominidae; Homo	PF00005.27^ABC_tran^ABC transporter^72-182^E:4.1e-13	0	0	COG1131^(ABC) transporter	KEGG:hsa:9619`KO:K05679	GO:0005789^cellular_component^endoplasmic reticulum membrane`GO:0005768^cellular_component^endosome`GO:0009897^cellular_component^external side of plasma membrane`GO:0005794^cellular_component^Golgi apparatus`GO:0000139^cellular_component^Golgi membrane`GO:0016021^cellular_component^integral component of membrane`GO:0005739^cellular_component^mitochondrion`GO:0005886^cellular_component^plasma mem…	GO:0005524^molecular_function^ATP binding`GO:0016887^molecular_function^ATPase activity	GTCCGTCATCAGCAGCGAGCCGCAGCCGCAGGAGGCGACGCAGGTGGTGCCGGCCCGCAAGAGGGAGCTCAAGAGGGACACCAGCCGCCTGCCAAACGAGGTCTTCACGCGCCTGCCCACCAAGCCGCCCGTCGACATACGCTTCGACAACGTCGGCTACACCGCGTCGCTCGGCTTTCGCAAAGGCAAGAAAAAGATCCTACACGAAGTATGTGGCCGCTTCGTTCCAAAGCAGCTGATTGCCATCATGGGGCCATCCGGTGCTGGCAAATCCACGCTCCTCGACATCCTCTCTGGCTACAGGCTGACTGGCGTGACGGGCTCGGTGCTGGTGAACGGCGTGGAGCGGCAGCTGGACGAATTCCGCAGGCTATCCTGCTACATCACGCAGGATGACCG…	SVISSEPQPQEATQVVPARKRELKRDTSRLPNEVFTRLPTKPPVDIRFDNVGYTASLGFRKGKKKILHEVCGRFVPKQLIAIMGPSGAGKSTLLDILSGYRLTGVTGSVLVNGVERQLDEFRRLSCYITQDDRLQELLTVHENMLVAADLKLGEDTDLSEKAQIVEETLRTLGLWEARKTLAGR
TR91510|c1_g1	1.74284	2.6952	19.4641	0.000709484	0.00892913	CHLE_HORSE^CHLE_HORSE^Q:619-32,H:51-259^44.81%ID^E:3e-42^RecName: Full=Cholinesterase;^Eukaryota; Metazoa; Chordata; Craniata; Vertebrata; Euteleostomi; Mammalia; Eutheria; Laurasiatheria; Perissodactyla; Equidae; Equus	TR91510|c1_g1|m.17579	2-619[-]	CHLE_HORSE^CHLE_HORSE^Q:1-196,H:51-259^44.81%ID^E:1e-44^RecName: Full=Cholinesterase;^Eukaryota; Metazoa; Chordata; Craniata; Vertebrata; Euteleostomi; Mammalia; Eutheria; Laurasiatheria; Perissodactyla; Equidae; Equus	PF00135.28^COesterase^Carboxylesterase family^1-193^E:4.9e-73`PF07859.13^Abhydrolase_3^alpha/beta hydrolase fold^51-169^E:1.6e-10	0	0	COG2272^Carboxylesterase	0	GO:0005576^cellular_component^extracellular region`GO:0003990^molecular_function^acetylcholinesterase activity`GO:0004104^molecular_function^cholinesterase activity	GO:0016787^molecular_function^hydrolase activity	GAAGGAAGGCAGCCAGCCGCGCGTCGTCGTCGTCAGTGTGGTTATCGCTCTGCGCCTGGAAGCCGAGCGCCTCCGCCATCCGGTACGCCCTCTCGCGGGGTTTGTCTGTCAGTGCCCAGGGTGCCGTTGCTACCCCACTCTCCATGCTCACTCCACTGAAGAGTCCCTTGGTGGCCGGTGAGAGGAAGAGATGTGACGTGGAGCCGCCACCCGCACTTTCCCCAAATATGACAACGCTGCTAGGATCTCCGCCGAAGGCTGCGATGTTTCTCTGCACCCACTGTAGCGCCAGCACCTGGTCCTTGAAACCCGCATTGCCCGGGATGTCGTCGTTCAACAGGCTCAGGAAACCAAGGGCTCCGAGACGGTAGGCGATTGTGACTAGCACAACGCCCTTCT…	SWSGVRDALSFADACAQPLFFGLIPITTGSEDCLYLNVYAPAAASGPYPVMVYIHGGAFKGGSSSSSTPHSFVEKGVVLVTIAYRLGALGFLSLLNDDIPGNAGFKDQVLALQWVQRNIAAFGGDPSSVVIFGESAGGGSTSHLFLSPATKGLFSGVSMESGVATAPWALTDKPRERAYRMAEALGFQAQSDNHTDDDDARLAAFL
TR46800|c0_g2	1.74233	2.96304	10.9577	0.00566588	0.0226795	CEX2_CAEEL^CEX2_CAEEL^Q:809-594,H:114-189^32.89%ID^E:1e-07^RecName: Full=Calexcitin-2;^Eukaryota; Metazoa; Ecdysozoa; Nematoda; Chromadorea; Rhabditida; Rhabditina; Rhabditomorpha; Rhabditoidea; Rhabditidae; Peloderinae; Caenorhabditis	0	0	0	0	0	0	ENOG4111I7F^calcium ion binding	KEGG:cel:CELE_T09A5.1	GO:0005783^cellular_component^endoplasmic reticulum`GO:0005509^molecular_function^calcium ion binding`GO:0017156^biological_process^calcium-ion regulated exocytosis	0	TTTTTTTTTTTTTTGGCCATGTCTTTTCTTTATTTTCAATAACTCATATAAATACAAAATATTGTTCAGCACAGAGTTGTACATGACCTGCAGCACCTTCTTTATTAAATAAAATAATTATCTGTTATATTTGTAAAAACGATTATCATTTTAACAGAGGAAATTGAGGAATAATTGTGTGTCAGGTCCAAATAAAGATAACGGGGTGTGTGTGATGAACTTGCATGGGAAAGATAACTTTGATAACAGAATGAAAACAATAGTCATACTTTGCACAGGCCTATGTCTATGGCAGTAATATGCTCTTATATGTCTTTTTCTTTTTGTTGCATGAATTTAACAGAGTTTGGGTCATGGATGTATGGAGCATACAGCAGAAGAGATGGCCCTGCCTGGTGA…	0
TR98488|c0_g1	1.74137	2.04276	18.1181	0.00094473	0.00976105	0	0	0	0	0	0	0	0	0	0	0	GTCAGGAACAGAAGAGTTTCTTGGACCACGACCTCACATCCCGAAGGGTTTACCAGCAACTATGCACATAAATTTACCTACGTTTTAACATTTCTTCTTTAATTGTTTGGATGATATGCAAGAAAAACAAATGTGTTTGCTAAATGAGCTCAGCCTTAATTATCGCGGTTACTGCTATTTCTTTTGTTAAGCATCATTTTCATAAGCCACCAAAGTAGCATAAAAAGTCATAGTAGTAGTACATTTGCCTCTATCGTATTCTGTGACATTCCATGGATCTCTGTAACAATTCTTCATGCACGGTGTTTTATTTCTGATACTCAAATGTTTCTCCTTTTCAAGACAAACATTGGTGTTAAAGCTCTTTATAAGTACACTTGGA	0
TR96056|c0_g1	1.74066	6.39304	10.9131	0.00573973	0.0228124	CRYAB_CHICK^CRYAB_CHICK^Q:881-474,H:41-168^42.65%ID^E:8e-22^RecName: Full=Alpha-crystallin B chain;^Eukaryota; Metazoa; Chordata; Craniata; Vertebrata; Euteleostomi; Archelosauria; Archosauria; Dinosauria; Saurischia; Theropoda; Coelurosauria; Aves; Neognathae; Galloanserae; Galliformes; Phasianidae; Phasianinae; Gallus	TR96056|c0_g1|m.18722	402-923[-]	L2EFL_DROME^L2EFL_DROME^Q:38-152,H:65-176^51.3%ID^E:7e-31^RecName: Full=Protein lethal(2)essential for life;^Eukaryota; Metazoa; Ecdysozoa; Arthropoda; Hexapoda; Insecta; Pterygota; Neoptera; Holometabola; Diptera; Brachycera; Muscomorpha; Ephydroidea; Drosophilidae; Drosophila; Sophophora	PF00011.21^HSP20^Hsp20/alpha crystallin family^49-142^E:1.9e-24	0	0	ENOG410YERS^Heat shock protein	KEGG:dme:Dmel_CG4533`KO:K09542	GO:0048471^cellular_component^perinuclear region of cytoplasm`GO:0030018^cellular_component^Z disc`GO:0051082^molecular_function^unfolded protein binding`GO:0061077^biological_process^chaperone-mediated protein folding`GO:0007275^biological_process^multicellular organism development`GO:0042026^biological_process^protein refolding`GO:0010998^biological_process^regulation of translational initiatio…	0	TTTTTTTTTTTTTTTTACTCAAGAACAACTTTTATTATTTTCCTTTATTACAGCAATTCTCCTACAAAAACGAAGTGCAGTTACAAATATAATGGAATGAAACGTTTAGGAAAAAAATACAAACGATGTTATATTTCATATTGAAAAGGTGAAGTTCTATGGCAAGTATTTATCTCTAGCAAGATACACATGAAAAACTCCATGTTGTGTACGTAAATGAGAATACACAGAATCACATTTGACTATTATCTGAATACATAACTTAACTGTTAACTGTTTACAAAATTCATGAAATTAATACTTCTAGAGGGAAAATAGTATCAGTCTTAAGTTTAACACGCAACAGCGTTATTTTAAGGAAGCTGTTACTACAATCCTGACGCCTAAATTTCGTTTGTC…	MSLLPLIFGEIEYPSPRISPRYSRNLLLDALSQLEAAQKEIGAAQYYGDDGLKVNLDVQQFKPDEVTVKVVDKFVVVEAKHEERQDQHGYISRSFTRRYLIPEDADADKIASTLSSDGVLSIVAPKKRPLPMPDANERIVPIVRSSAPAVKQVSEPSKVEQEGAAATEDTSSK*
TR92223|c0_g1	1.73843	2.5449	15.2032	0.00184362	0.0125067	0	TR92223|c0_g1|m.17838	2-1399[+]	0	0	0	0	0	0	0	0	GGGTGCGGAGGAAACTCTGCACGGTAATTCTCCATATGTCGATGAACAGAAAGTAGACATCCCGGAGAAGAAAATACCTGCCAGTACAAGGACTGATTCACCCGATTTTAATGAACCATCCACAAACCCAGACCTCTTAAGGCTCTACCAGGATGAACCTGAGGAGCAGTTTCCAGAAGAATTTTTAGAAATAGAAGTCCCAGAAAGCTACGAACGTCCTTTTGAGCCAGAACGTGACCAAGAATACTTCAAGCTTCCAGATGAAGAAGAAATGCTACTCTCGGACGAAGGAAAGAAAGAAAGGCTGGAAGAGTCGGATGAAGAAAACCAGCAGTTGTTGACTGCTGATGACAGCGCTACAGCAGCTGCTGACAATGCTGACCTGAGCGTTTCTGGCGG…	GAEETLHGNSPYVDEQKVDIPEKKIPASTRTDSPDFNEPSTNPDLLRLYQDEPEEQFPEEFLEIEVPESYERPFEPERDQEYFKLPDEEEMLLSDEGKKERLEESDEENQQLLTADDSATAAADNADLSVSGGEHNATQEEIEATVKKFEWLVEDKEEPLPSDSPERNADIPSAPSAGNEGEEVPREEHIDDTDDLLADDSGLHLLDDGGRDEAAPIEEHVDDTEDILADDHGLAELHDDEKAVAETDASRKQEVEGAGDQSEAKTLTDSEQPAESEVEFKKPDKRGKRKSRRTDRVKRSKRPRKCRPRPEEQKSFKEPDAVVTDDKPVVETSENVPEGIVEDTKAEEQPVKCEPEVTTSEPKRPCKPRERRESGCPAFSDGVLDDGRVSKSTAGLFLK…
TR104916|c0_g1	1.73374	4.9192	11.0245	0.00555731	0.0224471	0	TR104916|c0_g1|m.997	1-363[-]	0	0	0	0	0	0	0	0	GGCCGACTCGCGCCGTCCACCGGCCACGTGCAGCCCCAGAGCGGGTCGCTGGCCGACAAGCTGCACCACCTCTACGGCATCCCCAACGATCTGCTCGTCAAGTTCCAGAACTTGCCAACACCGAGTGATTTCGATATCAACATGTACATATGGGTGAAGATCTCGACGCACCCAACATTCCAGCAGATGGTGCAGCTGGCGGCCACGGGACAGTATTGCGTGGGCGTCAACTGTTACAGCCTGCAGGAGCCGTGGGGCAACTGCTGTCCATTCTGAGCTCTCCGTCTCCCTTCTCACACTACACCATTCATCGTCATTGCTTCTGAAAACACTGATAAAGAAAATCGCATTGTATTTGTACATTTTGTTCCTAAATAATCCATTTAACTTATTTATTTG…	MYKYNAIFFISVFRSNDDEWCSVRRETESSEWTAVAPRLLQAVTVDAHAILSRGRQLHHLLECWVRRDLHPYVHVDIEITRCWQVLELDEQIVGDAVEVVQLVGQRPALGLHVAGGRRESA
TR13695|c0_g1	1.73072	0.952849	38.854	3.11273e-05	0.00694482	0	0	0	0	0	0	0	0	0	0	0	GCCCGCCCGCCTGCGCCTACCCCCGACAGCACTGTTTGTGTTTGTCTCCTCTTGTGTTGCTAACATTGCTGGCTTCTTTTTTAAAGGTGCCTATATTTGGGCAGCAGCAGTACGCACCCTACAAAGTCAACTCCTAGAAAGTTGTGGTGCTCGAGACGAGACTCGAGTCTTAAGCATTCACGTCACCTCGGTTAACCCATTCTTTCCCAATGTGGTCCAATCTTAGCACACCTGTGGACTATCTGGTAACATTTTTTGAACTTTCTAATCTTTTATATTAATTTTTTGATGGGAGGAGGGGGCAGTCAGGGGAGAGAGAGCCTGGTATTGCAACGACACTGTCCAGAGCTTTGAATGTGATGGTTGGGTTGAGAGAGAGAGAGAGAGAGAG	0
TR34420|c0_g1	1.729	4.63528	33.4464	6.45968e-05	0.00694482	TRET1_ANOGA^TRET1_ANOGA^Q:151-636,H:616-775^35.19%ID^E:2e-21^RecName: Full=Facilitated trehalose transporter Tret1 {ECO:0000303|PubMed:20035867};^Eukaryota; Metazoa; Ecdysozoa; Arthropoda; Hexapoda; Insecta; Pterygota; Neoptera; Holometabola; Diptera; Nematocera; Culicoidea; Culicidae; Anophelinae; Anopheles	TR34420|c0_g1|m.2384	1-702[+]	TRET1_ANOGA^TRET1_ANOGA^Q:1-212,H:566-775^32.55%ID^E:1e-29^RecName: Full=Facilitated trehalose transporter Tret1 {ECO:0000303|PubMed:20035867};^Eukaryota; Metazoa; Ecdysozoa; Arthropoda; Hexapoda; Insecta; Pterygota; Neoptera; Holometabola; Diptera; Nematocera; Culicoidea; Culicidae; Anophelinae; Anopheles	PF00083.24^Sugar_tr^Sugar (and other) transporter^5-206^E:1.6e-24	0	ExpAA=127.09^PredHel=6^Topology=i7-29o44-66i73-95o110-132i144-161o176-195i	ENOG410XNQK^Transporter	KEGG:aga:AgaP_AGAP005563`KO:K14258	GO:0005887^cellular_component^integral component of plasma membrane`GO:0005886^cellular_component^plasma membrane`GO:0005351^molecular_function^carbohydrate:proton symporter activity`GO:0015574^molecular_function^trehalose transmembrane transporter activity`GO:0015771^biological_process^trehalose transport	GO:0022857^molecular_function^transmembrane transporter activity`GO:0055085^biological_process^transmembrane transport`GO:0016021^cellular_component^integral component of membrane	GACCCGGTGAATCGGCGCACGCTGCTGCTGGCGTCGGCGCTGCAGGCGCTGCTGCTGTGGTGCGGCTTCCTCGTCATGATGACGTATGCCACCTTCTTCTTCAAGCTGTCCGGCAGCTCGCTCGACCCCGACCTCTCGTCCATCTCGCTCGCCGTCATCCAGCTCATCATGAGCGTCGTCGCTTCCGTCGCCGTCGAGCGCTTCCGCACGCGCAAGATACCGCTCATGGTGTGCTTCTCGGGAGCCTGCTTGGCGCTCATCTCGGAAGGCTTCTACTTCTACATGAAGGACGGTCTCCACGCCGACGTGTCTTCCATCGGCTGGCTTCCACTCACGGCTCATATCGCTTTCTTGATCTTCAACACATTGGGCCCAGGAGCCCTCATATGGACTGTTTGC…	DPVNRRTLLLASALQALLLWCGFLVMMTYATFFFKLSGSSLDPDLSSISLAVIQLIMSVVASVAVERFRTRKIPLMVCFSGACLALISEGFYFYMKDGLHADVSSIGWLPLTAHIAFLIFNTLGPGALIWTVCGEVFRPRVKGVAMSVLSIVNCGSAFATLKTYHLMYTYFDLYYSFWMFATICLVGMVFVWQLVPETKGRHPEEVALEIAGLKPGRTADVPATAEEMQKIKV*
TR63477|c0_g1	1.72455	1.81807	23.7372	0.000308756	0.00728973	GTR6_HUMAN^GTR6_HUMAN^Q:678-10,H:39-260^32.59%ID^E:7e-21^RecName: Full=Solute carrier family 2, facilitated glucose transporter member 6 {ECO:0000305};^Eukaryota; Metazoa; Chordata; Craniata; Vertebrata; Euteleostomi; Mammalia; Eutheria; Euarchontoglires; Primates; Haplorrhini; Catarrhini; Hominidae; Homo	TR63477|c0_g1|m.10191	1-729[-]	GTR6_HUMAN^GTR6_HUMAN^Q:18-240,H:39-260^32.59%ID^E:2e-21^RecName: Full=Solute carrier family 2, facilitated glucose transporter member 6 {ECO:0000305};^Eukaryota; Metazoa; Chordata; Craniata; Vertebrata; Euteleostomi; Mammalia; Eutheria; Euarchontoglires; Primates; Haplorrhini; Catarrhini; Hominidae; Homo	PF07690.16^MFS_1^Major Facilitator Superfamily^33-198^E:6.2e-17`PF00083.24^Sugar_tr^Sugar (and other) transporter^57-238^E:1.6e-29	0	ExpAA=119.16^PredHel=6^Topology=i19-41o61-83i90-108o113-135i147-169o179-201i	ENOG410XNQK^Transporter	KEGG:hsa:11182`KO:K08144	GO:0005887^cellular_component^integral component of plasma membrane`GO:0005765^cellular_component^lysosomal membrane`GO:0016020^cellular_component^membrane`GO:0005886^cellular_component^plasma membrane`GO:0005351^molecular_function^carbohydrate:proton symporter activity`GO:0033300^molecular_function^dehydroascorbic acid transmembrane transporter activity`GO:0005353^molecular_function^fructose tra…	GO:0055085^biological_process^transmembrane transport`GO:0016021^cellular_component^integral component of membrane`GO:0022857^molecular_function^transmembrane transporter activity	CAGCGGGTCGCTGTTGCGCTCCTCCACCGCGCGGCGCATCGCCGCGAACTCCTCCTCCACATCCTCGGAGTTGTTCATGCCGCGCAGCCTGACGAGCGACTGCTGGGCCTCGCTGTTGCGCCCCCTGAGCAGCAGGTAGGTGGGGGACTCCGGCATCCACGAGAGGGTGGCCACCAGCAGCAGGGGGAAGGCCATCATGATACCAGCCAAAGTGCGGAAGTGCACGTACGGTGCCACGCAGAACACCACCAGTGTGCCCAGGTTCTGCATCACCTGGTAGATTGTGATCAGTGTTCCCCGGATCTCGAGCTCGGCTATCTCGACGAGATAGCAAGGGGACGCTACCAGGACGATGCACTGCGCGATGGCGCCGATGACGCGGGACAGCATCAACTCCCA…	MEQQKQRQAPRGSRRLQYAAAFSATLGYVTFGAFLGWGAPVLPRLTSNSSHIPTTEDEASWIIASSSLSMVFPMLFIGHLVDIVGRKRMLLFTVFPHSALWLIQIFATQPWELMLSRVIGAIAQCIVLVASPCYLVEIAELEIRGTLITIYQVMQNLGTLVVFCVAPYVHFRTLAGIMMAFPLLLVATLSWMPESPTYLLLRGRNSEAQQSLVRLRGMNNSEDVEEEFAAMRRAVEERNSDPL
TR102686|c0_g1	1.71736	4.78125	23.8551	0.000302192	0.00728973	NPC1B_DROME^NPC1B_DROME^Q:89-3715,H:16-1220^40.97%ID^E:0^RecName: Full=NPC intracellular cholesterol transporter 1 homolog 1b {ECO:0000305};^Eukaryota; Metazoa; Ecdysozoa; Arthropoda; Hexapoda; Insecta; Pterygota; Neoptera; Holometabola; Diptera; Brachycera; Muscomorpha; Ephydroidea; Drosophilidae; Drosophila; Sophophora	TR102686|c0_g1|m.667	566-3802[+]	NPC1B_DROME^NPC1B_DROME^Q:2-1050,H:178-1220^43.04%ID^E:0^RecName: Full=NPC intracellular cholesterol transporter 1 homolog 1b {ECO:0000305};^Eukaryota; Metazoa; Ecdysozoa; Arthropoda; Hexapoda; Insecta; Pterygota; Neoptera; Holometabola; Diptera; Brachycera; Muscomorpha; Ephydroidea; Drosophilidae; Drosophila; Sophophora	PF16414.5^NPC1_N^Niemann-Pick C1 N terminus^1-92^E:1.4e-18`PF02460.18^Patched^Patched family^329-1060^E:3.8e-76`PF12349.8^Sterol-sensing^Sterol-sensing domain of SREBP cleavage-activation^450-602^E:4e-56	0	ExpAA=305.84^PredHel=14^Topology=o94-116i129-146o161-183i322-341o421-443i456-478o484-506i561-583o629-651i910-932o936-955i962-984o1004-1026i1039-1061o	ENOG410XR54^Niemann-Pick disease type C1	KEGG:dme:Dmel_CG12092`KO:K12385	GO:0016021^cellular_component^integral component of membrane`GO:0005886^cellular_component^plasma membrane`GO:0007417^biological_process^central nervous system development`GO:0008203^biological_process^cholesterol metabolic process`GO:0007391^biological_process^dorsal closure`GO:0030299^biological_process^intestinal cholesterol absorption`GO:0007422^biological_process^peripheral nervous system de…	GO:0016021^cellular_component^integral component of membrane	GGGAGGAGTCACGCAGGCCAGCAGCATCATGAACTCCGCCTGGCAGTGGATAGGACTAGTTTTGCTTCTCTGGGCAGGAACAACCATTGCGCAAGAAGAGAGTGAGGGTCACTGCGTATGGTACGGTGAATGTTACGATGACGGCGCAAGCAACAAGTTCAACTGCTATACCAACATAACAGCACAGAACTTGACCGACAAAGACTCACTTGAATACTTAAAGCAAACATGTCCCTTTCTGGTGGACCAAGAAGCAAAATATGCTACTCTGTGCTGCGATGGGCCCATGCTCGTTTCGATGCAAGAGAAGCTGAGCGTGGCTGAGGGCCTGCTGAAGCGCTGTCCTACGTGCTTGAACAACTTCCGCAAGCACCTGTGTGGAATGACGTGCGACCCACA…	MCGSFGAAGCTYDRWFAYMGDDDTPLVPFPIVYNETAPDGMELYNPDVLPCNQSYENDYACSCADCEESCPADITVIDTGETNEEFKIGEADGVLVIMAIIYGIFAIGFLISVIFVSQSDTAGGSPPSLIYKLFFGGIPLFQTTLSKLFRKLGLVFASYPGATICLTSWAVVGMSYGALSLIVTTDRIELWASPTSQSRIEKDYFDTHFGPFYRTEQVFIKAHGLDNIMYESGMQPVEFGPVFNKTFLLTVLDLQQQIIQIGAGESYELKNICNAPLATGEVKTEDCLVQSIWGYLKNNASLLEDDSYLSILLTCMQNNVDFSCLGPYGGPIFAGLALGGFPEDANVNYSKYALSTGLSLTFLVNNHLDKTDLQPALEWESKFIQFLKEWSETKMPSFM…
TR106972|c0_g1	1.71587	3.60831	7.66716	0.0160038	0.0445896	F120B_HUMAN^F120B_HUMAN^Q:362-1006,H:22-234^23.15%ID^E:4e-14^RecName: Full=Constitutive coactivator of peroxisome proliferator-activated receptor gamma;^Eukaryota; Metazoa; Chordata; Craniata; Vertebrata; Euteleostomi; Mammalia; Eutheria; Euarchontoglires; Primates; Haplorrhini; Catarrhini; Hominidae; Homo	TR106972|c0_g1|m.1471	305-1015[+]	F120B_BOVIN^F120B_BOVIN^Q:1-234,H:1-234^24.05%ID^E:7e-18^RecName: Full=Constitutive coactivator of peroxisome proliferator-activated receptor gamma;^Eukaryota; Metazoa; Chordata; Craniata; Vertebrata; Euteleostomi; Mammalia; Eutheria; Laurasiatheria; Cetartiodactyla; Ruminantia; Pecora; Bovidae; Bovinae; Bos	0	0	0	ENOG410ZBE9^family with sequence similarity 120B	KEGG:bta:524306	GO:0005634^cellular_component^nucleus`GO:0045444^biological_process^fat cell differentiation`GO:0035357^biological_process^peroxisome proliferator activated receptor signaling pathway	0	CGTACTTGTATTAGATAAACGGGGGAATGCCGCGTCTACGTCAGTGAGTTGAAGTGACTATATAACTGTGTCCTACATTGTGGTTCTACGGATGTGTTAATTTACAGAGGGAGTGCTGTTTGTATAGAAGATGTTGCACGAATAGTGCTTTTCTGCAGCTGAGAGTAACGGCATACAGTTTCTTTCCGCGGAAGTGCTGTAAACTATTCTGGAAGATCTTGAGAGTGCTGTTCTAGCGTCTGATACAGGAGATAGACAATCGTCGCAATATTGCTGAAAAACTCTTACCAATTACGAGAGAAGAATGGGCATTTCTGGACTCTTTGGCTTCGTCGTAAAAGGTAAATTCTATAAGGTCGTGGATCTACAAAAAATCGCTGAAGAATTTAAGAAGAAAAG…	MGISGLFGFVVKGKFYKVVDLQKIAEEFKKKSGEDPVIAVDGSACMWHIYEPLDFLRGGQYKKFRDYCANFVQRFRDNGIHLVLFFHGVPVEDEIHTWTDKKKDKTMFVSNLFSSLRSGAVRTDSTVRTLPEAVIPAARVIFEHLGCRVYLSKGNCKHDIAKYVSSTKHCIGVLTNDSDFFAMKGVSSVLTFRNLEKDGKLKTYQFRPVDIATHLGIGQEHMPTFATFVGNDFVRAD
TR53536|c0_g1	1.71453	2.24077	30.6824	9.71282e-05	0.00694482	0	0	0	0	0	0	0	0	0	0	0	TTTTTTCATTAACAGGTCAAAGACTTTTATTAGGACCTTCACTACAGTGTTGTCTTTCAGAAATTTCTTCCAACATATTGATTTCGAATGTTCTCTCTGAGAAATAAAGAAACGTTAATTACTATAACAATTCAGTCTTCTTACACCTCCAAGAGATGCAAGTGAAATACAGGAGCACATAGTCCTGAAGCATGCATGTAACTGTTCATTTTTACAATAATACTTCAAGTTTTGCTATTTTTTGTGGCATTAGCATGTGGAGCTTCTTCCAGTAGTTGTTTCTAATATCGGTGATAATGGCATGGAAAGCTCTAGCTTGTGATAATCACACAAAACAATTTCCACAGTGAAAATATTATTGGTTATATAAGTTGCTCTGAAGGAACATTTGATTCTTGT…	0
TR82403|c2_g5	1.70956	3.86616	24.4188	0.000272962	0.0071856	CTRB2_PENVA^CTRB2_PENVA^Q:191-27,H:45-99^52.73%ID^E:7e-10^RecName: Full=Chymotrypsin BII;^Eukaryota; Metazoa; Ecdysozoa; Arthropoda; Crustacea; Multicrustacea; Malacostraca; Eumalacostraca; Eucarida; Decapoda; Dendrobranchiata; Penaeoidea; Penaeidae; Penaeus	TR82403|c2_g5|m.15010	3-341[-]	CTRB2_PENVA^CTRB2_PENVA^Q:51-105,H:45-99^52.73%ID^E:8e-10^RecName: Full=Chymotrypsin BII;^Eukaryota; Metazoa; Ecdysozoa; Arthropoda; Crustacea; Multicrustacea; Malacostraca; Eumalacostraca; Eucarida; Decapoda; Dendrobranchiata; Penaeoidea; Penaeidae; Penaeus	PF00089.26^Trypsin^Trypsin^52-107^E:8.2e-13	sigP:1^18^0.893^YES	0	0	0	GO:0005615^cellular_component^extracellular space`GO:0004252^molecular_function^serine-type endopeptidase activity`GO:0030574^biological_process^collagen catabolic process	GO:0004252^molecular_function^serine-type endopeptidase activity`GO:0006508^biological_process^proteolysis	GGCTCAATAATGCTGAGACTGGTGAGTCCAAGCCTCACCTCCCACGTGCTGAACCCGGAGGCACAGTGCCCCGCTGTTAGGACGACAGAGGCGGAGATCAGCGACCCGCCACACATGTAGGAGTAGTCCATGATCATGGACGCCTGGTGTGGGAACTGGCCGAGTGAGGCTGGGGCGCCATTTACAATGCGGCCAGCAGGCTTTTCAGGCTTTGGGTGTCCAGGCACAAGTGGCTTTGTCTTCACCATAGGTGTAAGATTGCGCTGTAGCGTCGCATACTGGGGCAGCGCCTGAACGGCAGCGGCCACGGCAAAGAGCAATATTGCCAACACGTTCATTCTGG	RMNVLAILLFAVAAAVQALPQYATLQRNLTPMVKTKPLVPGHPKPEKPAGRIVNGAPASLGQFPHQASMIMDYSYMCGGSLISASVVLTAGHCASGFSTWEVRLGLTSLSIIE
TR92287|c0_g1	1.70606	4.44553	21.2327	0.000496155	0.00795928	GLBL2_HUMAN^GLBL2_HUMAN^Q:110-1963,H:46-627^39.07%ID^E:3e-119^RecName: Full=Beta-galactosidase-1-like protein 2;^Eukaryota; Metazoa; Chordata; Craniata; Vertebrata; Euteleostomi; Mammalia; Eutheria; Euarchontoglires; Primates; Haplorrhini; Catarrhini; Hominidae; Homo	TR92287|c0_g1|m.17913	236-1975[+]	GLBL2_MOUSE^GLBL2_MOUSE^Q:2-579,H:89-630^39.69%ID^E:6e-116^RecName: Full=Beta-galactosidase-1-like protein 2;^Eukaryota; Metazoa; Chordata; Craniata; Vertebrata; Euteleostomi; Mammalia; Eutheria; Euarchontoglires; Glires; Rodentia; Myomorpha; Muroidea; Muridae; Murinae; Mus; Mus	PF01301.19^Glyco_hydro_35^Glycosyl hydrolases family 35^1-291^E:1.6e-84`PF02449.15^Glyco_hydro_42^Beta-galactosidase^3-124^E:1.3e-06	0	0	COG1874^beta-galactosidase	KEGG:mmu:244757	GO:0005576^cellular_component^extracellular region`GO:0005773^cellular_component^vacuole`GO:0004565^molecular_function^beta-galactosidase activity`GO:0005975^biological_process^carbohydrate metabolic process	GO:0004565^molecular_function^beta-galactosidase activity`GO:0005975^biological_process^carbohydrate metabolic process`GO:0009341^cellular_component^beta-galactosidase complex	GTGGTTACTAGCGTGCATGTTCGGCCTTCTGGCCACAGGAAGTGTCCACTGCCAAGATGAAGAGCTACAGCCAGTTCTTACATACTACCAGGGCTCATCGATAGAGTCTGGACTTGTAGCAGATGCTGATGGTTTTCACCTAAACAACAAGAGCCTCACTATATTCAGTGGTGCACTCCATTATTTCAGAGTTCATCCTTCCTACTGGGAAGATCGCATAGCCAAAATTAGTGCTATGGGACTGGTTGCTGTTGAGACGTATGTACCATGGAACTTACATGAACCTGAAGAAGGGGTTTATGACTTTGGAGATGGAGACAGAGAATTCTCTCCATTTTTGGATCTGGACTTATTTATTCAAAAAGTTTATGAAGCCAATCTTCTGATGCTGATACGACC…	MGLVAVETYVPWNLHEPEEGVYDFGDGDREFSPFLDLDLFIQKVYEANLLMLIRPGPYICGEWEFGGLPSWLLRTPDIKVRTSDEKYTSKVKAYYDKLLPIIAKWQFVKGGPIIAVQLENEYGATGVNDKEYLAFLRDLYISYGIEGLFFTSDSPLSSGDSGALEGVLQTANFQDNPEGQLDRLKELQPDKPSMVMEYWSGWYDHWMQGSHSTTSVETFRDVLERIITYPASFNLYMFHGGTSFGFMNGANVGSSFPTYSPDVSSYDYDAPLSEAGDYTDKYTAVQELLEQYAPRKFLKAEAPKESDKLAYADVPLVGQLSLDELAAQVDSGDRVDATDVMPMELLDINNGNGQSYGFVLYRKSGVTIGESSLLQIIGNVRDLAVVLVDGESKTEPLTS…
TR69991|c0_g1	1.70533	3.91742	14.1361	0.00239996	0.0142093	TRET1_POLVA^TRET1_POLVA^Q:1747-1127,H:185-392^38.28%ID^E:2e-30^RecName: Full=Facilitated trehalose transporter Tret1 {ECO:0000303|PubMed:17606922, ECO:0000312|EMBL:BAF63703.1};^Eukaryota; Metazoa; Ecdysozoa; Arthropoda; Hexapoda; Insecta; Pterygota; Neoptera; Holometabola; Diptera; Nematocera; Chironomoidea; Chironomidae; Chironominae; Polypedilum; Polypedilum	TR69991|c0_g1|m.12098	878-1750[-]	TRE12_DROME^TRE12_DROME^Q:2-208,H:170-377^39.9%ID^E:8e-43^RecName: Full=Facilitated trehalose transporter Tret1-2 homolog {ECO:0000303|PubMed:20035867};^Eukaryota; Metazoa; Ecdysozoa; Arthropoda; Hexapoda; Insecta; Pterygota; Neoptera; Holometabola; Diptera; Brachycera; Muscomorpha; Ephydroidea; Drosophilidae; Drosophila; Sophophora	PF00083.24^Sugar_tr^Sugar (and other) transporter^13-211^E:4.1e-33	0	ExpAA=106.56^PredHel=5^Topology=o13-35i98-120o135-157i164-186o196-213i	ENOG410XNQK^Transporter	KEGG:dme:Dmel_CG8234`KO:K14258	GO:0005887^cellular_component^integral component of plasma membrane`GO:0016020^cellular_component^membrane`GO:0005886^cellular_component^plasma membrane`GO:0005351^molecular_function^carbohydrate:proton symporter activity`GO:0015771^biological_process^trehalose transport	GO:0022857^molecular_function^transmembrane transporter activity`GO:0055085^biological_process^transmembrane transport`GO:0016021^cellular_component^integral component of membrane	TCCAACAGATAAGAAGTTGTAATTTATTTGAGTTAGTGTTCCAGTATTTGCATGAACAGGATTTAGTCACCAGATGTAGCAATGGCACCAGAGAGTGTACAGCAGTGCACGAATTGCCACATGTTCCAAGGTAATTTCAGTTTCGCGGTGGCCTTCTGGAGCCAACCAACACGGCCACAGCGGCCGGCGTTTACTAAGCAGCGTGAATCTGATATAAAGTACAACAATCAATCCAACAGATGAGAAGTTATAATTTATTTGAGTTAGTGTTCCAGTATTTGCATGAACAGGATTTAGTCACCAGATGTAGCAATGGCACCAGAGAGTGTACAGCAGTGCACGAATTGCCACATGTACCAAGGTAATTTCAGTTTCGCGTTGGCCTTCTGGAGCCAACCA…	AGMLLIYVVGPYVTYHALAAVCVAVPAVFAAVFFTRPESPYFFLYQGNDGAAERALRAVRGDDEDISAEFSDMQEAVEDAKKNEASFRDLVSTRGNVRALYLTLGLMTFQQLSGINAMLFFGEAIFKMTGSSIDSSVSLIIVGFVMLAASCTTPLLADRLGRRIMLVASAIGMCISQVVLAIYFQMASSGKDVSSLGWLPVTTFVMYIAVYPPKAFSKSTNARNVGLPFLNLASKMSRRVSIVSLAPTFLRNPDGLDCVINVCSFSAELCRRWVAPGADCSQASARCRGP*
TR71780|c0_g1	1.70292	5.82311	27.8148	0.000152708	0.00694482	0	0	0	0	0	0	0	0	0	0	0	GACTTGATCCAGATGCTGAGGGACGCCGGTATCGATGTGGACGCCATTATGGACTTCTTCAGGAAGATCTTCGGCTGGACGTTTTAAAGCCATTGAGTCTTCCTGCACTCTCACCTGCGAACTGATAATATAAGCACATTTTCCAGTCACCGATTTTGACGTACTCAATGCGTAAAAAAAATAAACCTCTGTGCTAAAAGTTTATTGTGATACTTTTTGTGAAACTCCGTGAGTCTGAACCCTCTTTCAATACCAAGTAATTTTAGGCTGTCTTGTAAGACAAATATTTTTCGACCATTTAAGAACAAAACGTAGGCCAGATTTTATAATCATTGCTTGCATTTACTTTCCTCCTAGTCCTAAGTGTGCTGCAGATCTGTGTTGACTTATTTGTTGTGA…	0
TR45978|c0_g1	1.69996	9.24546	14.0385	0.00245989	0.0143211	LIPT_MOUSE^LIPT_MOUSE^Q:2472-1966,H:26-187^41.76%ID^E:5e-33^RecName: Full=Lipoyltransferase 1, mitochondrial;^Eukaryota; Metazoa; Chordata; Craniata; Vertebrata; Euteleostomi; Mammalia; Eutheria; Euarchontoglires; Glires; Rodentia; Myomorpha; Muroidea; Muridae; Murinae; Mus; Mus`LIPT_MOUSE^LIPT_MOUSE^Q:1972-1649,H:161-257^39.45%ID^E:4e-11^RecName: Full=Lipoyltransferase 1, mitochondrial;^Eukaryot…	TR45978|c0_g1|m.5310	957-1364[-]	LIPT_HUMAN^LIPT_HUMAN^Q:3-102,H:255-348^30%ID^E:1e-05^RecName: Full=Lipoyltransferase 1, mitochondrial;^Eukaryota; Metazoa; Chordata; Craniata; Vertebrata; Euteleostomi; Mammalia; Eutheria; Euarchontoglires; Primates; Haplorrhini; Catarrhini; Hominidae; Homo	0	0	0	COG0095^Lipoate-protein, ligase	KEGG:hsa:51601`KO:K10105	GO:0005759^cellular_component^mitochondrial matrix`GO:0005739^cellular_component^mitochondrion`GO:0016746^molecular_function^transferase activity, transferring acyl groups`GO:0034641^biological_process^cellular nitrogen compound metabolic process`GO:0006464^biological_process^cellular protein modification process`GO:0006629^biological_process^lipid metabolic process`GO:0009249^biological_process^…	0	TTTTTTTTTTTTTTTTTTTTTTTATAGAAAAATTAAAAACTTTACTTTTCATTCCAGTTGTTACAACTGCCTATATAGTTCTCAAACAGCACAGTACTTAAAATTAGTAATAGACATACATTTCTGTGTGCATATTATATCACAATGATTTTCAGTTCCTCACTTTAGAAGTTTTACATGGACTGACAAAACAGAAAAAACAAAAATATAATAAAAAGCAGTACATTAACAATCACACATAATTAACAAAGATTTGTTACAAAATAATAACTACAGTATACATACAAACCACAGAAAACTGTTTAACTAAGGCTTTTGATATGATGTATTCTTGTGAACTGTATTTCAACAGCCAAAAATAAAAATATTTAAAAATGAAAACGGGAATTCATAGGCATC…	MPLFLGLEKIKEEFSSWDWCYGKTPKFEVTRSFPVSQETTGESTKELKITLVVEKGIIQNVTLTVPPGIKSANGFHGEARVVTSLRGRRFSEEAVFILENSLQAMKFHENDLVHTVAVGKNDFLGNRRQHAIHSM*
TR84919|c0_g1	1.6999	3.18143	9.03647	0.0101628	0.0328042	GLCM_BOVIN^GLCM_BOVIN^Q:2-1420,H:82-533^41.79%ID^E:4e-118^RecName: Full=Lysosomal acid glucosylceramidase {ECO:0000305};^Eukaryota; Metazoa; Chordata; Craniata; Vertebrata; Euteleostomi; Mammalia; Eutheria; Laurasiatheria; Cetartiodactyla; Ruminantia; Pecora; Bovidae; Bovinae; Bos	TR84919|c0_g1|m.15754	158-1432[+]	GLCM_BOVIN^GLCM_BOVIN^Q:11-421,H:121-533^45.35%ID^E:1e-119^RecName: Full=Lysosomal acid glucosylceramidase {ECO:0000305};^Eukaryota; Metazoa; Chordata; Craniata; Vertebrata; Euteleostomi; Mammalia; Eutheria; Laurasiatheria; Cetartiodactyla; Ruminantia; Pecora; Bovidae; Bovinae; Bos	PF02055.16^Glyco_hydro_30^Glycosyl hydrolase family 30 TIM-barrel domain^11-352^E:4.5e-115`PF17189.4^Glyco_hydro_30C^Glycosyl hydrolase family 30 beta sandwich domain^355-419^E:1.2e-09	0	0	COG5520^glucosylceramidase activity	KEGG:bta:537087`KO:K01201	GO:0005783^cellular_component^endoplasmic reticulum`GO:0005794^cellular_component^Golgi apparatus`GO:0005765^cellular_component^lysosomal membrane`GO:0005764^cellular_component^lysosome`GO:0005802^cellular_component^trans-Golgi network`GO:0004348^molecular_function^glucosylceramidase activity`GO:0046527^molecular_function^glucosyltransferase activity`GO:0016787^molecular_function^hydrolase activi…	0	CTCCAAGGCGGGCGCCCGCTTCCAGGAGCAGATCGTCTCCTTCCAGGAGGCCGGCCAGGCCGGCGACTCGGAGGCGGTCCTGTCGGTTAACCGCTCGGTGCGGTTCCAGGAGGTGCACGGCTTCGGCGGCGCCATGACCGACGCTGCGGGCCTCAACATGGCGTCGCTCAGCGACGCTGCGCGAGACGGCGGCGCCATGACCGACGCGGCGGGCCTCAACATGGCTTCGCTCAGCGACGCTGCGCGAGAAAATCTGCTCAGGGCTTACTTCGCGCCGGAGGGCCTGCACTACAACATGGCGCGCGTGCCCGCGGCGGGCACCGACTTCTCGACGCGCACCTACTCCTACGACGACGTGGAGAACGACACCAGCCTGGAGCACTTCAGCCTCGCCGACGA…	MASLSDAARDGGAMTDAAGLNMASLSDAARENLLRAYFAPEGLHYNMARVPAAGTDFSTRTYSYDDVENDTSLEHFSLADEDLLYKIPYLQHAQDLRGEELLLVSAAWSAPTWMKTNGKFNGEGKLIREYWQLWADYLLRFVEEYASVGLPIWVLSAQNEPTDGNSDFWFNCMGWSATEQRDWVAQHLGPTLQAAVAQPPPDVLVIDDQRSMLDRWPQQILTNETVTQYAKFVGVHWYTDQFSPASMLDDVHQLSPETQILYTEACNGLRDMGEVAVLLGSWERGEKYATSIIEVLNHWSTGWLDWNLALNTSGGPNWVNNNVDSPVIVNATADEFYKQPMFYVLGHFSRFVTRGSVRLQLDAQLPAAASLDSVALETPQGRTVLVLSNKATEEVTVRV…
TR73031|c0_g11	1.69563	4.46827	13.3391	0.00294448	0.0157222	PRDXL_DICDI^PRDXL_DICDI^Q:251-3,H:28-110^51.81%ID^E:2e-25^RecName: Full=1-Cys peroxiredoxin;^Eukaryota; Amoebozoa; Mycetozoa; Dictyostelids; Dictyosteliales; Dictyosteliaceae; Dictyostelium	TR73031|c0_g11|m.12815	3-350[-]	PRDXL_DICDI^PRDXL_DICDI^Q:34-116,H:28-110^51.81%ID^E:2e-25^RecName: Full=1-Cys peroxiredoxin;^Eukaryota; Amoebozoa; Mycetozoa; Dictyostelids; Dictyosteliales; Dictyosteliaceae; Dictyostelium	PF00578.21^AhpC-TSA^AhpC/TSA family^44-116^E:1.1e-16	0	0	COG0450^alkyl hydroperoxide reductase	KEGG:ddi:DDB_G0282517	GO:0005829^cellular_component^cytosol`GO:0004601^molecular_function^peroxidase activity`GO:0051920^molecular_function^peroxiredoxin activity`GO:0045454^biological_process^cell redox homeostasis`GO:0034599^biological_process^cellular response to oxidative stress`GO:0042744^biological_process^hydrogen peroxide catabolic process	GO:0016209^molecular_function^antioxidant activity`GO:0016491^molecular_function^oxidoreductase activity`GO:0055114^biological_process^oxidation-reduction process	ACCCAGTCCACGTGGTCCTTGAGCTTGTCACAGGAGAGCGCCAGCAGCTTGACTCCTCGCTTCTGGAACTCCGGGTTGTGGACGGCGATGCGGCCCAGCTCTGTGGTACACACCGGCGTGAAGTCAGCCGGGTGCGAAAACAAAACACACCACGAGTTGCCTTTCCACTTGTAGAAGTCCAGTGGCCCCTGCGTGGAGGGCGCCTTGAAGTTGGGTACGACGCTCTCGAGCTTCATGCTGCTGCCTGTAGGTAGCTGTACCAAGTAGCACCCTGCGTGGATGGCGCCGTGAAGTTGGGTACAATGCTCTCGAGCTTCATGCTGCTGCCTGTAGGTAGCTGTACCAAGTAGC	LLGTATYRQQHEAREHCTQLHGAIHAGCYLVQLPTGSSMKLESVVPNFKAPSTQGPLDFYKWKGNSWCVLFSHPADFTPVCTTELGRIAVHNPEFQKRGVKLLALSCDKLKDHVDW
TR81881|c0_g1	1.69444	3.03923	13.2564	0.00300882	0.0158393	0	TR81881|c0_g1|m.14795	38-454[+]	0	PF07809.11^RTP801_C^RTP801 C-terminal region^86-126^E:6.9e-08	0	0	0	0	0	GO:0009968^biological_process^negative regulation of signal transduction`GO:0005737^cellular_component^cytoplasm	AGCAAACATTTTTTTTTTCGAATAGTATTTTTTGTCAATGGTTATTTTTCGTGTTTTACAGAGGGTGCACGCTGCATGTGGCGCTGATCGCAAACGCAAGATGGTGAAAAGAGTGGTGTCTGCGCTTAGCTGTGATTCGCCGGCGTCTTTCGACAAGGCGATGGAAGTGCTGCCGTGTCCGCTATCCGTCGATTTCTCGTGTTTCTATGATGGCGAGAGCGAGAGGCCAGAAGATTTGGACGACGTTTGTGTGGAGGCTCGAGACGCTCTGTCGCGGCGCGTGGAGGCGGAGCTGAGGGAGGCGCACGGGGGCGGCGTCGTACTGCCCCCAGGACTGCTGCCCTCGGCTGCAGAACGTATCCTGCAGATGGCCAGCACCGAGCCCTACGGACTCAGAGG…	MVIFRVLQRVHAACGADRKRKMVKRVVSALSCDSPASFDKAMEVLPCPLSVDFSCFYDGESERPEDLDDVCVEARDALSRRVEAELREAHGGGVVLPPGLLPSAAERILQMASTEPYGLRGCTLHVVSTPYLTSTYFQ*
TR35732|c0_g1	1.69035	1.5189	32.3037	7.62231e-05	0.00694482	DHR11_CHICK^DHR11_CHICK^Q:402-1,H:1-138^52.9%ID^E:2e-41^RecName: Full=Dehydrogenase/reductase SDR family member 11;^Eukaryota; Metazoa; Chordata; Craniata; Vertebrata; Euteleostomi; Archelosauria; Archosauria; Dinosauria; Saurischia; Theropoda; Coelurosauria; Aves; Neognathae; Galloanserae; Galliformes; Phasianidae; Phasianinae; Gallus	TR35732|c0_g1|m.2512	1-414[-]	DHR11_CHICK^DHR11_CHICK^Q:5-138,H:1-138^52.9%ID^E:2e-41^RecName: Full=Dehydrogenase/reductase SDR family member 11;^Eukaryota; Metazoa; Chordata; Craniata; Vertebrata; Euteleostomi; Archelosauria; Archosauria; Dinosauria; Saurischia; Theropoda; Coelurosauria; Aves; Neognathae; Galloanserae; Galliformes; Phasianidae; Phasianinae; Gallus	PF00106.25^adh_short^short chain dehydrogenase^12-134^E:3.1e-27`PF08659.10^KR^KR domain^13-121^E:3.3e-07`PF01370.21^Epimerase^NAD dependent epimerase/dehydratase family^13-96^E:4.6e-06`PF05368.13^NmrA^NmrA-like family^14-77^E:0.00012`PF13561.6^adh_short_C2^Enoyl-(Acyl carrier protein) reductase^17-134^E:6.4e-19`PF13460.6^NAD_binding_10^NAD(P)H-binding^17-93^E:1.2e-06	0	ExpAA=18.36^PredHel=1^Topology=i12-31o	COG4221^serine 3-dehydrogenase activity	KEGG:gga:395172`KO:K22970	GO:0005576^cellular_component^extracellular region`GO:0072582^molecular_function^17-beta-hydroxysteroid dehydrogenase (NADP+) activity`GO:0072555^molecular_function^17-beta-ketosteroid reductase activity`GO:0000253^molecular_function^3-keto sterol reductase activity`GO:0004303^molecular_function^estradiol 17-beta-dehydrogenase activity`GO:0000166^molecular_function^nucleotide binding`GO:0006703^b…	GO:0003824^molecular_function^catalytic activity`GO:0050662^molecular_function^coenzyme binding	GTCGTCAACGCCCCTGCTCAGCATGTCCTGCACGGCCTCCCTGGTGCAGATGCTCAGACCCAGCACATTCACGTCGAGCATGCGCTTCCACGACTCCGTAGGGGCGGATGATAGGTCGCTCTCTACGACAAGTCCAGCGTTGTTAATGAGGATGTCGACACCTTTCAGATTGTCCTTAATCCATTTGAAAGCAGCAAGGATGCTTTTCTCGTTGCTGACATCTCCTTCTAGAGCGTACAACTTTCCAGGAGCATCTTTTAGTGCCAGTGCCTTGACCTTGTCGACTCTCCTAGCCAGCCCCACCACGGTGAGCCCGCGCCGGAGCAGACTTTGGGTGATGGCTGCGCCGATGCCGACGCTGGCGCCTGTGACCAGAGCGACGCGGCCTGCGTACCTGTC…	KSAAMDRYAGRVALVTGASVGIGAAITQSLLRRGLTVVGLARRVDKVKALALKDAPGKLYALEGDVSNEKSILAAFKWIKDNLKGVDILINNAGLVVESDLSSAPTESWKRMLDVNVLGLSICTREAVQDMLSRGVDD
TR91530|c0_g1	1.68959	2.97852	56.1914	4.64552e-06	0.00694482	TRY7_ANOGA^TRY7_ANOGA^Q:2388-1744,H:56-267^38.53%ID^E:2e-37^RecName: Full=Trypsin-7;^Eukaryota; Metazoa; Ecdysozoa; Arthropoda; Hexapoda; Insecta; Pterygota; Neoptera; Holometabola; Diptera; Nematocera; Culicoidea; Culicidae; Anophelinae; Anopheles`TRY7_ANOGA^TRY7_ANOGA^Q:2938-2414,H:41-209^35.43%ID^E:1e-28^RecName: Full=Trypsin-7;^Eukaryota; Metazoa; Ecdysozoa; Arthropoda; Hexapoda; Insecta; Pte…	TR91530|c0_g1|m.17603	304-609[+]	0	PF01498.18^HTH_Tnp_Tc3_2^Transposase^39-92^E:8e-07	0	0	0	0	0	GO:0003677^molecular_function^DNA binding`GO:0006313^biological_process^transposition, DNA-mediated`GO:0015074^biological_process^DNA integration	ATTGGTATTTATTTCTGGAAACAAAGCACATTGATTAGTACAAAGTATCTGAAATAATGTTTCGTCTGTAAGTATTGATTACTCAAGATCGGAGTGAATGAGGCGTGCACCCTTTCAGACTCCTGAGACCTCGTTGATCCAGGACCTGAGATTACCGACGTTGGCGTAAACGTCGAGGCCAAGCTCGCACGGGTAGAGCGTCCAGGACAAGACGCCAACCTGCGTGCTGCCACTGACCAGTTTGTAGCACTTAGCCAAGTAGGTTTATTTATTCACCAAATTGCGAAACAGTGTAGTGTTTCTATGGGGGGAGTGCAATACATCTTTCACCGCCAGAAGACAACAAGTAGCAATAACGTCATACCACGACCAGGACGACCTCGTAATACAACTAAAAGT…	MGGVQYIFHRQKTTSSNNVIPRPGRPRNTTKSDDKYMRITSNRNRFKTAPQICSELVETNSTTISVATLKRRLSEVGLKGCVTSIKLLLRPIYKIRDLNGI*
TR107783|c0_g1	1.6852	1.00021	13.6357	0.00272657	0.0150998	0	0	0	0	0	0	0	0	0	0	0	GTCCGATAACAATTTGCTTCACTGAAGCGCAATAAATTATGTGGTATTTCTCTGCGAATAGCTTACATTTTTATGAGGTACACCAGCATCTGGTAGCTTTACGGAACGACGTTGGTCATATGGAAGACTACTGTGCACGTCATTATGGAAGCATAGCTCATATAACTGAAAATCTGTTATGTGTGTGGGGTCCTGTTCTTTCAGACAAGTCCGAAGGAATAGACGCCATTTTGATATTGAAGGTACCATGAATCAACTCACAAAGGAGTAAAGACATGGGAATATAACTGGCAAGCTGAAATTTTGTGCCACCCTCGGTTTCTAGCCCGAGTCTCCAACTTACTAGGCAGATACGCTGACCACTGAGCCATCTGCACACAGGGATCTCCTCATATGCAC…	0
TR5162|c0_g1	1.68084	0.487973	15.3184	0.00179304	0.0123595	B3GT1_PONPY^B3GT1_PONPY^Q:809-141,H:94-316^30.21%ID^E:2e-22^RecName: Full=Beta-1,3-galactosyltransferase 1;^Eukaryota; Metazoa; Chordata; Craniata; Vertebrata; Euteleostomi; Mammalia; Eutheria; Euarchontoglires; Primates; Haplorrhini; Catarrhini; Hominidae; Pongo	TR5162|c0_g1|m.6805	63-818[-]	B3GT1_PONPY^B3GT1_PONPY^Q:4-226,H:94-316^30.21%ID^E:2e-29^RecName: Full=Beta-1,3-galactosyltransferase 1;^Eukaryota; Metazoa; Chordata; Craniata; Vertebrata; Euteleostomi; Mammalia; Eutheria; Euarchontoglires; Primates; Haplorrhini; Catarrhini; Hominidae; Pongo	PF01762.21^Galactosyl_T^Galactosyltransferase^2-189^E:5.4e-39	0	0	0	0	GO:0000139^cellular_component^Golgi membrane`GO:0016021^cellular_component^integral component of membrane`GO:0047275^molecular_function^glucosaminylgalactosylglucosylceramide beta-galactosyltransferase activity`GO:0006486^biological_process^protein glycosylation	GO:0008378^molecular_function^galactosyltransferase activity`GO:0006486^biological_process^protein glycosylation`GO:0016020^cellular_component^membrane	GGGGCTCAGGACTGGGGCACACTGATCACTGGAGGAAGACCCGTCTGCTGCATAGGCCGACGTCACCACTCACGTCCCTGGTCAATAAAGCCGAGGCGGCCGAGCAGCCAACAGAGGCCGGCCGGCGGCCTGGTGGCGGTGTCCCAGATGGCGCGGATCTCGTGGGCGGTGAGGCTGCCCGTGGAGAGCGAGGCGCGCGCCAGACACGGCCTGGTGAGCCAGAGCAGCGACGGCCAGGCGTCGAGGTCGGGCACGTCGTGACGCGTCAGCCCTGCGGCGTCAGCGGCCACGCCCGTCGTCAGGACGTCTTCCAGCGGCAGCAGGGGCGTCTTGAGGGCGGCGCGCAGCAGCGGCCGCAGCGCAGAGCCCGCCACGGCGTAGCTGGGCCCGGACAGGTAC…	RERRDAVRETWGRALRNSSRLLFVTGHSGDGRLQEELIAEALVNGDMLVEDMVDTYDNLTVKTLLMLKWTADHCSQVSYVVKVDDDVVLNVRALSRVLAGAAERGWPLVGRLLRRPAPFRSPHHKWYLPRWLYPDDALPEYLSGPSYAVAGSALRPLLRAALKTPLLPLEDVLTTGVAADAAGLTRHDVPDLDAWPSLLWLTRPCLARASLSTGSLTAHEIRAIWDTATRPPAGLCWLLGRLGFIDQGREW*
TR59919|c1_g2	1.6806	2.471	17.1476	0.00117113	0.010531	MYRO1_BREBR^MYRO1_BREBR^Q:3681-3175,H:101-268^52.35%ID^E:8e-41^RecName: Full=Myrosinase 1 {ECO:0000303|PubMed:11804799};^Eukaryota; Metazoa; Ecdysozoa; Arthropoda; Hexapoda; Insecta; Pterygota; Neoptera; Paraneoptera; Hemiptera; Sternorrhyncha; Aphidomorpha; Aphidoidea; Aphididae; Macrosiphini; Brevicoryne`MYRO1_BREBR^MYRO1_BREBR^Q:4105-3548,H:100-282^46.32%ID^E:2e-38^RecName: Full=Myrosinase 1 {…	TR59919|c1_g2|m.9423	832-1719[-]	LPH_RABIT^LPH_RABIT^Q:87-266,H:1669-1841^40.33%ID^E:2e-36^RecName: Full=Lactase-phlorizin hydrolase;^Eukaryota; Metazoa; Chordata; Craniata; Vertebrata; Euteleostomi; Mammalia; Eutheria; Euarchontoglires; Glires; Lagomorpha; Leporidae; Oryctolagus`LPH_RABIT^LPH_RABIT^Q:79-258,H:658-839^39.15%ID^E:7e-30^RecName: Full=Lactase-phlorizin hydrolase;^Eukaryota; Metazoa; Chordata; Craniata; Vertebrata; …	PF00232.18^Glyco_hydro_1^Glycosyl hydrolase family 1^86-261^E:9.1e-45	0	0	COG2723^beta-glucosidase	KEGG:ocu:100009256`KO:K01229	GO:0016324^cellular_component^apical plasma membrane`GO:0016021^cellular_component^integral component of membrane`GO:0017042^molecular_function^glycosylceramidase activity`GO:0000016^molecular_function^lactase activity`GO:0005975^biological_process^carbohydrate metabolic process	GO:0004553^molecular_function^hydrolase activity, hydrolyzing O-glycosyl compounds`GO:0005975^biological_process^carbohydrate metabolic process	TTCCACTCTAAATTGTCCAGAAGGCTCCAAGCCGTGTATCCAATTACGTTGGCTCCATCTTCGTTAATAGCTTTCAGTCAGGCAGCGTGTGAGCAGTCAAAAGGAAGGGGCTTAATGCATAAGACATTAAATAGTTTTATTTACAAATAGTTATGGGTTAATGATTTCTGCAGAAAATATTTACAATGTTTGTTTTTAAGTTTTCCTTGACACATTTACAGCCAAAAACTTATGTGAAATATTCTTCTGGTACACTCATGTTCCTGTAGATGCCAGCAAGGAAGCTCGCTGAAGCCTTGGGTGTTCTTGTCCTTTCAGTACGGCGATCTACAAAAAATGAATTTTTTTATTTTTTTCTAGAAAATGTATCAGGATAACATTTAGTCTTCCGATTTTGGT…	MCQGQLHRGGEADDQRICGFFWIEFVHNTNGVISRVRYLSINAARHRSLQDAQLHLPCQRRLLAHGCAMGFSQNYKLGVYKVPELMINGSADFLGFNSYTTMTVFSREHGISPSMDRDSGVFRMPNYTYPTSSAFWITVVPWGFRRVLDWASTRYPNYPIIVTENGYADYGDTENGYADYGELDDQERISYYGQYLAEMLKAINEDGANVIGYTAWSLLDNLEWNSGFSVKFGIYHVDFNSTERTRTPKASASFLAGIYRNMSVPEEYFGLGKLSCWHLQEYECTRRILPVIVSM*
TR93182|c0_g1	1.67923	5.86887	17.119	0.0011787	0.0105583	CLVS1_HUMAN^CLVS1_HUMAN^Q:945-199,H:46-295^29.53%ID^E:4e-32^RecName: Full=Clavesin-1;^Eukaryota; Metazoa; Chordata; Craniata; Vertebrata; Euteleostomi; Mammalia; Eutheria; Euarchontoglires; Primates; Haplorrhini; Catarrhini; Hominidae; Homo	TR93182|c0_g1|m.17991	154-1035[-]	CLVS1_HUMAN^CLVS1_HUMAN^Q:13-279,H:28-295^30.15%ID^E:9e-42^RecName: Full=Clavesin-1;^Eukaryota; Metazoa; Chordata; Craniata; Vertebrata; Euteleostomi; Mammalia; Eutheria; Euarchontoglires; Primates; Haplorrhini; Catarrhini; Hominidae; Homo	PF00650.20^CRAL_TRIO^CRAL/TRIO domain^105-258^E:4.4e-36`PF13716.6^CRAL_TRIO_2^Divergent CRAL/TRIO domain^142-256^E:6.4e-07	0	0	ENOG410XRSQ^Transfer protein	KEGG:hsa:157807	GO:0030136^cellular_component^clathrin-coated vesicle`GO:0031901^cellular_component^early endosome membrane`GO:0005768^cellular_component^endosome`GO:0005802^cellular_component^trans-Golgi network`GO:0032588^cellular_component^trans-Golgi network membrane`GO:0080025^molecular_function^phosphatidylinositol-3,5-bisphosphate binding`GO:0007040^biological_process^lysosome organization	0	TTTTTTTTTTTTTTTTTTTTACAAAAGTACTTATACATTTAATGTAGTAATATAAGGAACATCACATTAAAAGGAATGTATAAATTTGTTGAACACAAAATGAGAAATTCCTGCGCAGGGGCCGATACTGCGGCGGATGTCGCAAGTCACTCGTCACTTGCTCTGCTGCACCAGGCCGTACGAGTTCCACTCTTTAATTTCATCCGTAATATCACAAATTACTGGGTACCAGTCTTTGCTTGTGTAGTCAATTTTCGGCAGCTTGCCGCCATAGTCCTCAGGAAGGTGGCTGGGATCGAGGTGCTTGTGCAGTGATTCCATTTTGTCACCGTGGAAAAACATCCTGTTCCTCAGTTTTTCCCTGATGAACGGCTTGAACATGGTGAACACCATGTTGAA…	MTTPRERIGIQLAPLTQQQQQLAREELRETPENVAEAVVALRELLRADPTLHYRDDDDFLIRFLRPTKYYPKSAHELMKRAAVFKDKHSDLLRNLLPTDEEDAFVNHTVVNVLADRDHKDRRVLIVNCGGSWDPSKVTANQMFKLFYLIHEGAMLEPQTQVAGVVVIMDFKNMSLKQVRGLSPSFSMLLLSFIQDAMPLRLKEVHIVKQPYIFNMVFTMFKPFIREKLRNRMFFHGDKMESLHKHLDPSHLPEDYGGKLPKIDYTSKDWYPVICDITDEIKEWNSYGLVQQSK*
TR39417|c0_g2	1.67063	1.72482	32.5772	7.32338e-05	0.00694482	0	0	0	0	0	0	0	0	0	0	0	GTTCTTGTTCCACTATTTCTTCGAGAATTTGAAACCTGTTTTGAGTAAAATAGTGCAAAATGTTGCAGCCAGTCTGCAGTGTGCCACCCGTCAGGCAGATCCCCATGCTTCTTTCTCGCTGTGGTTGGATCCACAGGAGCCTTGAAAACAAATTCTTGTAGATTTTGCAGGACTTTTTTTTAAATTTCTACTGGCCTGTTGCAACCAATGCTTATTCAAAGTCTCCATATGTGCTACATTGTCTGTCTACTTCTCCAGCGGCAACAATTTCCCCTTTGTCCAAATTAGTTACTGGTTGATGTTACTTCATCCCTAGCCATTTTTAATCATACAACATTCAATTTGTCTGCAACACAACCAGTTTTATGAGGCTTTACAAGAAATTTCACCACCACATTG…	0
TR36954|c0_g2	1.66135	1.95008	22.9403	0.000357696	0.00743052	0	0	0	0	0	0	0	0	0	0	0	CTCACACACACACACACACACACACACACACACACACACACAGGAGCAACACAAATCTGGTAATTTAAAGATAACTTTGAAAATGTGATCAGGCCACTGACACTGTTTTACCAACCTCTGACAAAACACTTCTGCTCAGAGACAAGAAGTACAACACGAGGATGGGAAGTGAAGGTGGGTTCAAAACATCACAATGCGTTCCTCAGTAACCAACACAGTCCAGTGGAAAAAAATCATGCTCTCTAATGCAAGTATATTACAACAGCAAAAAAATGTACAAATGCCTGGAAGATCTTTTTGTGGACAGGTCTGAGGAAAATAAAGTTTTTTGGATTTTGTATGAACAGAACCTCATTTTAGAAATTAGTGGTAGTACAATGTTCACTTTTATCGATACAG…	0
TR59919|c1_g3	1.65257	3.11586	22.2927	0.000404157	0.00766232	MYRO1_BREBR^MYRO1_BREBR^Q:984-40,H:145-458^44.79%ID^E:1e-86^RecName: Full=Myrosinase 1 {ECO:0000303|PubMed:11804799};^Eukaryota; Metazoa; Ecdysozoa; Arthropoda; Hexapoda; Insecta; Pterygota; Neoptera; Paraneoptera; Hemiptera; Sternorrhyncha; Aphidomorpha; Aphidoidea; Aphididae; Macrosiphini; Brevicoryne`MYRO1_BREBR^MYRO1_BREBR^Q:1184-978,H:137-204^57.97%ID^E:9e-16^RecName: Full=Myrosinase 1 {ECO:…	TR59919|c1_g3|m.9428	1-804[-]	LPH_RABIT^LPH_RABIT^Q:2-263,H:1576-1841^42.75%ID^E:5e-64^RecName: Full=Lactase-phlorizin hydrolase;^Eukaryota; Metazoa; Chordata; Craniata; Vertebrata; Euteleostomi; Mammalia; Eutheria; Euarchontoglires; Glires; Lagomorpha; Leporidae; Oryctolagus`LPH_RABIT^LPH_RABIT^Q:2-255,H:579-839^41.98%ID^E:2e-60^RecName: Full=Lactase-phlorizin hydrolase;^Eukaryota; Metazoa; Chordata; Craniata; Vertebrata; Eu…	PF00232.18^Glyco_hydro_1^Glycosyl hydrolase family 1^3-258^E:1.2e-62	0	0	COG2723^beta-glucosidase	KEGG:ocu:100009256`KO:K01229	GO:0016324^cellular_component^apical plasma membrane`GO:0016021^cellular_component^integral component of membrane`GO:0017042^molecular_function^glycosylceramidase activity`GO:0000016^molecular_function^lactase activity`GO:0005975^biological_process^carbohydrate metabolic process	GO:0004553^molecular_function^hydrolase activity, hydrolyzing O-glycosyl compounds`GO:0005975^biological_process^carbohydrate metabolic process	TTATGTGAAATATTCTTCTGGTACACTCATGTTCCTGTAAATATTAGCAAGGAAGCTTGTTGATGCCTTGGGCGTCCTCGTCCGCTCAGTGCTGTTGAAATCCACTTGATAAATTCCGAACTTCTGGCTGTAACCAGAATTCCATTCGAAGTTATCCAGCAGGCTCCAAGCCGTATATCCTATTACGTTTGCCCCGTCTTCGTTAATAGCTTTCAACAGCTCTGCGAGGTATTGGCCATAATAGCTTATGCGTCCTTCATCGTCGAGTTCTCCCGTATCAGCATAACCGTTCTCCGCGATAAAGATTGGGTAGTTAGGATATCTCGAGGACACCCAGTTCACAATATTACGGAAACCCCACGGCACAACCTTGAGCCAGATGGCGGAGCTGCTGGGCCA…	MVYRLYDEQYRPTQNGKISITLNCDWFEPYNDLEETLEAQERMFQFQLGLYANPIYVDGDYPAVVRERVDNNSRAEGRPRSRLPSFTDEEKRMINGSADFFGLNSYTTMLVISAALGHSPSMDLDCGVLRIINFTWPSSSAIWLKVVPWGFRNIVNWVSSRYPNYPIFIAENGYADTGELDDEGRISYYGQYLAELLKAINEDGANVIGYTAWSLLDNFEWNSGYSQKFGIYQVDFNSTERTRTPKASTSFLANIYRNMSVPEEYFT*
TR76143|c0_g1	1.65197	5.91214	8.63899	0.0115538	0.0356462	LIPH_XENTR^LIPH_XENTR^Q:202-939,H:47-302^38.52%ID^E:2e-45^RecName: Full=Lipase member H;^Eukaryota; Metazoa; Chordata; Craniata; Vertebrata; Euteleostomi; Amphibia; Batrachia; Anura; Pipoidea; Pipidae; Xenopodinae; Xenopus; Silurana	TR76143|c0_g1|m.13486	34-1002[+]	LIPH_RABIT^LIPH_RABIT^Q:53-302,H:37-294^38.17%ID^E:9e-51^RecName: Full=Lipase member H;^Eukaryota; Metazoa; Chordata; Craniata; Vertebrata; Euteleostomi; Mammalia; Eutheria; Euarchontoglires; Glires; Lagomorpha; Leporidae; Oryctolagus	PF00151.19^Lipase^Lipase^52-319^E:1.6e-60	sigP:1^24^0.837^YES	0	ENOG4111AHY^lipase member	KEGG:ocu:100008812`KO:K19404	GO:0005576^cellular_component^extracellular region`GO:0016020^cellular_component^membrane`GO:0052689^molecular_function^carboxylic ester hydrolase activity`GO:0016042^biological_process^lipid catabolic process	0	GTCCACTATTTAAGAACGCTCGCATAACAGCTAATGACTCCATCCAAAATGGCATCCAAATTATTTCTGCTGCTGTGCTCTGTGCTTGTAGCTGATGTGAGTGCTGTACACTGGAAGCTTATCCCTGGTGGTGATGGGAAAATTTATCTCATTGATCTTGACTATGACAGCCCAGTAAAGTATGCTGTGAGTGACAGTGATGTCAGTTTCAGACTTTATACTAAATCAAACCCCTCCTCTGCTCAGTATGTGACGATTGGAGATGCTTCAACATTGGGCTACTTCAGCAACAGCCGACAAACAAGGTTTGCCATTCATGGATGGTTGTCAAATGAGGATCATCTAGTTGCACTTCGCAATGGTTGGATTCAAGGAGGTGATTACAACATTATCATGGTG…	MTPSKMASKLFLLLCSVLVADVSAVHWKLIPGGDGKIYLIDLDYDSPVKYAVSDSDVSFRLYTKSNPSSAQYVTIGDASTLGYFSNSRQTRFAIHGWLSNEDHLVALRNGWIQGGDYNIIMVDWRGPASNVLYKPAADAVPEVGAIVARFIDFLVQQGASASNMEVVGHSLGAHVAGVAGNRASATVGRITALDPAAPLFGGKDAADRVDSSDASFVQVIHTSVLGWVDSLGHADFFPNGGLLQEGCGVDIGGYCSHSRSHDLYAESITSSAFVSYQCDSYNNYENGACSGNTRVSMGAPCPSNTRGNFYLKTAGSSPYALG*
TR55943|c1_g1	1.64894	5.08204	11.4536	0.00491517	0.0209432	Y0031_DROME^Y0031_DROME^Q:611-24,H:19-183^34.85%ID^E:1e-25^RecName: Full=Trypsin delta/gamma-like protein CG30031 {ECO:0000305};^Eukaryota; Metazoa; Ecdysozoa; Arthropoda; Hexapoda; Insecta; Pterygota; Neoptera; Holometabola; Diptera; Brachycera; Muscomorpha; Ephydroidea; Drosophilidae; Drosophila; Sophophora	TR55943|c1_g1|m.8227	3-803[-]	Y0031_DROME^Y0031_DROME^Q:51-260,H:5-183^33.96%ID^E:7e-27^RecName: Full=Trypsin delta/gamma-like protein CG30031 {ECO:0000305};^Eukaryota; Metazoa; Ecdysozoa; Arthropoda; Hexapoda; Insecta; Pterygota; Neoptera; Holometabola; Diptera; Brachycera; Muscomorpha; Ephydroidea; Drosophilidae; Drosophila; Sophophora	PF00089.26^Trypsin^Trypsin^77-171^E:7.6e-20`PF00089.26^Trypsin^Trypsin^180-260^E:2.8e-12	sigP:1^24^0.764^YES	ExpAA=42.75^PredHel=2^Topology=o10-32i49-71o	0	KEGG:dme:Dmel_CG12351`KEGG:dme:Dmel_CG30028`KEGG:dme:Dmel_CG30031`KO:K01312	GO:0005615^cellular_component^extracellular space`GO:0004252^molecular_function^serine-type endopeptidase activity`GO:0008236^molecular_function^serine-type peptidase activity`GO:0006508^biological_process^proteolysis	GO:0004252^molecular_function^serine-type endopeptidase activity`GO:0006508^biological_process^proteolysis	GTCACAGTGTTGATGTTGGCGAAGGTGTTCCTGCACGTGTTACGGTCCAAGATGCTGATGTCCACCTTGAGCAGACTGTTGGCGGAAGGTCCATCGGTGTACGTGGCTCCCCAGCCAGTCACCGTCACGGCGAGACCACCTGGTGGGTCGTAGTTGTCACTGGCGAGGCCCACTGCCTGTGCGTTCGAACCCAGCAGAGATCCGGACACCTGGACAACGGCAACATCGTAGTCCACGGTATTTTCGTTGTACGATCCATGCATGTAGCCAGAGCTGGCGCTGCCCAGCAGAGATCCGGACACCTGAACAACAGCAACATCGTAGTCTATAGTCTGGTCGTTGTACGATGCGTGCATGTAGCCAGAGCTGGCGCTTCTGACGAAACCGCCGCTTCCACGG…	MGDTASTMQRLAIFLVCLLSSALALPTPARLWSKGNGRMGDTASTMQRLAIFLVCLLSSALALPTPARLWSKGNGRIIGGSSANIANYPWQLSFQYGGSHICGASIISSNWALTAAHCVDGMSLSLISFRAGTSTRGSGGFVRSASSGYMHASYNDQTIDYDVAVVQVSGSLLGSASSGYMHGSYNENTVDYDVAVVQVSGSLLGSNAQAVGLASDNYDPPGGLAVTVTGWGATYTDGPSANSLLKVDISILDRNTCRNTFANINTV
TR70359|c0_g1	1.64625	0.963291	17.8722	0.000996899	0.00995429	0	0	0	0	0	0	0	0	0	0	0	GGCCATGGCGGTGGCTGTGGATGTCATTATAGTAATTAGCTTGTATGACAACTGGCATATGAGTGATGTAGATTTGGTGGGAAATTTGTTGTGAATGTGAGTTGAGCTGAACGACACATATATCACTGGTCATCCATTTCAACGGAACATGGTGTGATACTGATGTTAATGTAAGAAAGATTAGGTAAAAAAGCATTAGATATAAAATAATTGAAAATCAATGAAAC	0
TR97|c0_g1	1.64563	1.32492	15.2435	0.00182574	0.0124525	MYO7A_DROME^MYO7A_DROME^Q:125-1234,H:9-378^68.65%ID^E:1e-173^RecName: Full=Myosin-VIIa;^Eukaryota; Metazoa; Ecdysozoa; Arthropoda; Hexapoda; Insecta; Pterygota; Neoptera; Holometabola; Diptera; Brachycera; Muscomorpha; Ephydroidea; Drosophilidae; Drosophila; Sophophora	TR97|c0_g1|m.19181	98-1234[+]	MYO7A_DROME^MYO7A_DROME^Q:10-379,H:9-378^68.65%ID^E:3e-174^RecName: Full=Myosin-VIIa;^Eukaryota; Metazoa; Ecdysozoa; Arthropoda; Hexapoda; Insecta; Pterygota; Neoptera; Holometabola; Diptera; Brachycera; Muscomorpha; Ephydroidea; Drosophilidae; Drosophila; Sophophora	PF00063.21^Myosin_head^Myosin head (motor domain)^66-376^E:5.8e-120	0	0	COG5022^myosin heavy chain	KEGG:dme:Dmel_CG7595`KO:K10359	GO:0045179^cellular_component^apical cortex`GO:0045180^cellular_component^basal cortex`GO:0005938^cellular_component^cell cortex`GO:0005737^cellular_component^cytoplasm`GO:0035182^cellular_component^female germline ring canal outer rim`GO:0070825^cellular_component^micropyle`GO:0005902^cellular_component^microvillus`GO:0031477^cellular_component^myosin VII complex`GO:0051015^molecular_function^ac…	GO:0003774^molecular_function^motor activity`GO:0005524^molecular_function^ATP binding`GO:0016459^cellular_component^myosin complex	ACTTGCGTCAGGATATTTCCTTATGGATGACATGTAGTACATCATTTGTAATGTATCATTAATGTTGATTTTAAGTTTATTGTGAAAACTTTACATCATGGCAAATTTTACTGTATCGACCAGTCATTTATGGATTAGACCTGAGGGGAAAGGAGAATTTGATGTTCCCATTGGTGTTAAAGTACTATCGACAGAAGGAAACAAGGTTAAGGTTCAAGATGATAGTGGAAAGCAAATGGTCGTATCAAATGACCAAATCATCAAGACTATGCATGAAACATCTGTACGAGGTGTAGAAGATATGATCACACTTGTTGATTTACATGAGCACACTATATTGAGGAATCTGCACATCAGATATAATGAAAATCTTATTTATACATACACTGGGTCAATTCT…	MANFTVSTSHLWIRPEGKGEFDVPIGVKVLSTEGNKVKVQDDSGKQMVVSNDQIIKTMHETSVRGVEDMITLVDLHEHTILRNLHIRYNENLIYTYTGSILVAVNPYQPLPIYTGDYVKEYKGQKVGDKPPHIFAIGDSSYTDMAKFGRNQCIVISGESGAGKTESTKLILQYLAAISGKHSWIEQQILEANPVLEAFGNAKTIRNDNSSRFGKYININFSQECVIEGAAIEQYLLEKSRIVSQNNGERNYHIFYEMLAGLTIDEKISLDLRGPADYRYLTGGGTLTCEGRDDAKDFAVVRAAMKVLNFNENEVWEIIKLLAVVLHLGNIKYKARVIANIDTSEIPDKVHAKKIADILGVPIEPLIEALTHKTIFAHGE
TR61389|c0_g2	1.64374	3.50877	16.8271	0.00125928	0.010827	CDD_MOUSE^CDD_MOUSE^Q:541-155,H:15-142^49.61%ID^E:8e-38^RecName: Full=Cytidine deaminase;^Eukaryota; Metazoa; Chordata; Craniata; Vertebrata; Euteleostomi; Mammalia; Eutheria; Euarchontoglires; Glires; Rodentia; Myomorpha; Muroidea; Muridae; Murinae; Mus; Mus	TR61389|c0_g2|m.9911	146-592[-]	CDD_MOUSE^CDD_MOUSE^Q:18-146,H:15-142^49.61%ID^E:6e-39^RecName: Full=Cytidine deaminase;^Eukaryota; Metazoa; Chordata; Craniata; Vertebrata; Euteleostomi; Mammalia; Eutheria; Euarchontoglires; Glires; Rodentia; Myomorpha; Muroidea; Muridae; Murinae; Mus; Mus	PF08211.12^dCMP_cyt_deam_2^Cytidine and deoxycytidylate deaminase zinc-binding region^16-84^E:3.4e-11`PF00383.23^dCMP_cyt_deam_1^Cytidine and deoxycytidylate deaminase zinc-binding region^18-119^E:5.5e-17	0	0	COG0295^cytidine deaminase	KEGG:mmu:72269`KO:K01489	GO:0005829^cellular_component^cytosol`GO:0004126^molecular_function^cytidine deaminase activity`GO:0042802^molecular_function^identical protein binding`GO:0001882^molecular_function^nucleoside binding`GO:0042803^molecular_function^protein homodimerization activity`GO:0008270^molecular_function^zinc ion binding`GO:0009972^biological_process^cytidine deamination`GO:0030308^biological_process^negati…	GO:0004126^molecular_function^cytidine deaminase activity`GO:0008270^molecular_function^zinc ion binding`GO:0009972^biological_process^cytidine deamination	CAGTTCATAAAATTCTATATTTTTATATACCCAAACCCACAAACAATTTTACAGAAATATTGTATTACAGTTTGAGAGCAAAGATAACAATTATTTGTTCATAAAGGCTTGCATTTTTCTTTCCTGTGATTAACGTGGCTGTACGTCACTGGGGAATTGACGTTGGAACGAACGATAGAGGCAATATAGTGTCCATGTCCGTCACTAGAACATCTGAAAAATCGGGCTTTGCCAGATAGACCTTCACATCTGTTCCAAATTCAACAATCACTTGACGACATGAGCCACAAGGTGATAGAAATCCATCGGTTACGTCTCCTGTTATTGCAAAATGCTTGAACACCTTTTTACCTTCACTTACGGCTTTCACAATTGCAGTGCGTTCAGCACATATCGTGC…	MSTRNQEIVKFSDLHSDIQELIRTAVAYRQKAHCPYSNFQVGAALKCDDDSVFGGCNVENVAYGCTICAERTAIVKAVSEGKKVFKHFAITGDVTDGFLSPCGSCRQVIVEFGTDVKVYLAKPDFSDVLVTDMDTILPLSFVPTSIPQ*
TR68651|c0_g1	1.64134	6.8983	8.67799	0.0114079	0.0354155	0	TR68651|c0_g1|m.11502	339-1670[-]	0	PF02958.20^EcKinase^Ecdysteroid kinase^54-340^E:3.1e-53`PF07914.11^DUF1679^Protein of unknown function (DUF1679)^99-340^E:3e-13`PF01636.23^APH^Phosphotransferase enzyme family^148-337^E:6.6e-13	0	0	0	0	0	0	AGAACCTGAAAGATAACAGTAAATACGGAACTTGAAAGAAACAAGATTAGCATCGAAAAGGTACAAAAAATTTATTTTATTGTAAATACTTAAGACATTATATAAACACTGGCACTTATGAAATTTTGATGGATACGAGACAGGTGAAAGGTTAGATGTTTTTAATGATGGTGACTATGCAACTGAGTAGTTGCGTAATTACTGACGAATGTTGTTGATGCAACGCTAACTGCAGTCCGTCGGCCTGAAAAATCAGTCTTACAGTTTAAGGACTAGGACACAAACGCCTCAGGGCGTGAGATTTCGGAACGAAATGCAACGGTTTCTTGTGACCGTCATCAGTCATTTTGAATGCTGGGATTCGAGGACAGGATACAGTGATCCACAAACTCTTGCACG…	MVKGVSCRTVGCRLADAGVLTRIECELVVSRRLGTRDFEFLDVKLAKLGGDGLGFMSEQYAVDVRIRTADSKLCNLRFFAKTLPRQSRLREDFIAAYGCFNREVAFYSTVAPLLKTALQQNGGKQKYIPECYFTTKDTLVFEDLTEGDFRSLEPGQALDYDHCSLVLKNLAALHAASILHEESVIKSEGKIYRISDSCSVDLVDKTTATVEIDGKARNWFDSCVKTVEPLLELLPKYKGRCEEIRAKLPRMRAVAERLLSPSDELRNVVCHGDLWTSNLLFRYQADSPTQVRFVDFQMARYLPPSTDVMVFLHLSTRRSFRQQWEPRLLGEYYEALERELWHGGVDAQRVLPRQQFLDSCEAARDLGRAVAAAYCPTVLMPAEHTDGMLRMRDDFERIL…
TR56546|c0_g2	1.63367	3.05908	8.17632	0.0134623	0.0397208	LIPH_HUMAN^LIPH_HUMAN^Q:527-1165,H:64-283^39.37%ID^E:2e-41^RecName: Full=Lipase member H;^Eukaryota; Metazoa; Chordata; Craniata; Vertebrata; Euteleostomi; Mammalia; Eutheria; Euarchontoglires; Primates; Haplorrhini; Catarrhini; Hominidae; Homo`LIPH_HUMAN^LIPH_HUMAN^Q:1182-1505,H:170-282^44.25%ID^E:3e-24^RecName: Full=Lipase member H;^Eukaryota; Metazoa; Chordata; Craniata; Vertebrata; Euteleosto…	TR56546|c0_g2|m.8277	494-1255[+]	LIPH_HUMAN^LIPH_HUMAN^Q:12-224,H:64-283^39.37%ID^E:2e-47^RecName: Full=Lipase member H;^Eukaryota; Metazoa; Chordata; Craniata; Vertebrata; Euteleostomi; Mammalia; Eutheria; Euarchontoglires; Primates; Haplorrhini; Catarrhini; Hominidae; Homo	PF00151.19^Lipase^Lipase^7-231^E:5e-61	0	0	ENOG4111AHY^lipase member	KEGG:hsa:200879`KO:K19404	GO:0005615^cellular_component^extracellular space`GO:0005886^cellular_component^plasma membrane`GO:0052689^molecular_function^carboxylic ester hydrolase activity`GO:0008201^molecular_function^heparin binding`GO:0016298^molecular_function^lipase activity`GO:0004620^molecular_function^phospholipase activity`GO:0016042^biological_process^lipid catabolic process`GO:0006654^biological_process^phosphat…	0	GGGGAAGAGCTGTCAAGATGAAAGTCATTGCTTTGATTCTTACACTTGCGGCAGTAGCCTCAGCCCGTCCTCGCCGGTGGGAGCTGGTTCCCACGAAGGATGGCGGAGTCGAGCTTTACGACCTGACCCAGCCTCTGCCGGAAGTCCGGGTCGATGCGAGTGACGTCGTCTTCCAGGGGAAGAGCTGTCAAGATGAAAGTCATTGCTTTGATTCTTACACTTGCGGCAGTAGCCTCAGCCCGTCCTCGCCGGTGGGAGCTGGTTCCCACGAAGGATGGCGGAGTCGCGCTTTACGACCTGATGCAGCCTCTGCCGGAAGTCCGGGTGGATGCGAGTGACGTCGTCTTCCAGCTCTACACTCAAGCAAATCCAAGTAGCCCTCAAACTTTGACAGCAGGT…	MVGYELEITMCNFVASKQTKFVSHGWMNSGDHMSDIRDGWLRAGDYNVIVIDWSVHAGNWNYAQAKAAVAGVGEVVATFINWLASLGASTNNMQLVGHSLGAHVCGVAGNRVTAGRLNRITGMDPAAPLFGSESTSNRLDASDASFVQVIHTNGGLLGWYDAMGTADFYPNGGQWQPGCDFDVTGACSHGRSTEFFAESITSGTGFKAYQCGSWNDYNAGNCASNPTALMGKQNHRHGPSSTILWFGAHLKPS*
TR52392|c0_g3	1.63203	3.09849	29.1434	0.000123336	0.00694482	0	TR52392|c0_g3|m.6991	3-299[+]	0	0	0	0	0	0	0	0	AGACTCATGAGGCGCTTGTGGCAAGTAGAATCATCACATTTTTTCTGCAGCAGCTGATGCAGGGTAAAATGCTGAAAGTGCTTACTCTTCTGCTTGCTGCAGTAGCACCATACGGCTCCTGTACATCGTTGGAGCTTCAGTTCACCCCACAAGATCTGACTCTGTTGAAAGGGGCATCTACTAGTATTCTTCTGTCCCTAAAGAAATCACCTGACAATGCAACTATTGAAATCTCTGCAGATCATGCAGATCTGGTATACATTTATCCATCCACCATAACTGTTATTGAAGGGAATGTATC	THEALVASRIITFFLQQLMQGKMLKVLTLLLAAVAPYGSCTSLELQFTPQDLTLLKGASTSILLSLKKSPDNATIEISADHADLVYIYPSTITVIEGNV
TR67747|c0_g2	1.63024	0.687032	23.8052	0.000304948	0.00728973	0	0	0	0	0	0	0	0	0	0	0	GCATTGCATCAGATATCTATATTATGGTTCTGCTTCCGCATCTGAAAGTGCTTCTTGCAGTGATCAGGAAAATGGTCCTGCAGCTGAAATAACCTTAACATATCACCCCCTTAACATATTCAAGTATAACATCTAATCTTCATGTGGTTAGAACCGAAACCTAACTACAGAGATGTTGGTAATATACTATGTATTCAAAATGTGCAAGGTGATGTAAACACAGACAATTTACTTTACTGCTTACAGACTAATGATTCTAACAAAAAATTACAGAAAACGTTTTTCATTAATGGTACAATATTTTACAGCTAAAGGTGGCATTCAAAATAAGTTAATAATTTTGTATGAAAATTTTGATGAGTCTGCTGCTGACATTTTTCAAACAATTCGAAAAAAAAT…	0
TR61188|c0_g1	1.62706	1.60699	11.8565	0.00438942	0.0196299	0	0	0	0	0	0	0	0	0	0	0	CTGGATTTTTTTGCTGGGAAACGCTGGATCATCTTTGCACCACGGAATGGCTCTGAAAATAGTATTTCGCTTATCAGTCCACATTCCCTGCACTTTTGGGAAAGTGTCAAAAATTACTTTACAACTGACAAACTGTTGTGGGTCATTCCGTAACTTATCACTATTAGTGTGAAATTAGTTATTTATTAGGAAGATGTAAAATTATTCTTTAAGAATTGTAGAGTTCCACTTATTTTTATAATTTTCGCGGAAAACTCGCAAATAATGCCCATAACATGAACATTATATTGAGTTGTGTGGCTTTTGGGAAAGATGTAGTTCTGCATTTACCGTTATCTTCCGCATAGTGGCTGAGGTACAGAACTCTCATTAGAGAGAAGAGCTGTTGCTTCTTATGCC…	0
TR76993|c0_g1	1.61604	0.731973	13.5251	0.00280557	0.0153292	0	0	0	0	0	0	0	0	0	0	0	CAAAGCCTTGCAGATCGCTAATCGTGTGGTCATAACAATTTTTGTATCTCCTAAATAAGTCAAGGTATCAAAATGAGGTTTTTGCAAACTATAGCACATAATGAGGCACATTAAGTTGTATGATGAATACTCTATACACTTTTTTATTCACTGAAACATGGAAATAGCTGATTAGCAGAAGTGAGAGGTTGTCTATTCATGATGCATTCAGATGACATTAGCACAGTAGAAAAACCCAAGTGGGCCACATACACACGCACCCAGAGCACCTGAGGACCACTGTAACACGAAAGGCACACATACCAGCAAATAGGTTAAGAAGCAAACTATTGTGAACCAAGGGTAACTTTTCTCCAGAACATGATTTAGTACATAATTCTATTTGACCTAACAATACTG…	0
TR42550|c0_g1	1.61422	7.78983	13.9801	0.00249663	0.0144233	0	TR42550|c0_g1|m.4568	4493-4792[+]	0	0	0	ExpAA=19.69^PredHel=1^Topology=o15-37i	0	0	0	0	CACCTGCCGACAGTGTACCTCCAACAGCGGTTTTGCAGTGCAAATTCCACTTCTGTTGCCGATGAGCAGCAGTCAGCCTGGATACATGAACCAGGTGCTTGCTGCCGAGACCAATACGCAGCAACGATCGGTGAACAGACAAGGTTGATAGCCAGTTCGTTTATCTGGTCGGTCAGCTGCTCACCAGTTGCATGTCTGTCTGCCCGTACCCGTGCCTACACACTTCTGTCATGTGTGGCCCGTGGGCGGCACAGTTGCCTCGGCGCCAGTTAGGGATAGCGCCACTTTGCTACGAAATAGATACCTTAAAAGTTTACAGACTTAGCAGTTTCGGAAAAGCTTCCATCCCTGGCCCGAAAGCCAACGATCATGCCCAATTTTTATACAAGTAATAAGTCA…	MQICYSLSSPQPLRMRFEGFFATLLVLCAISYFPGSLQRGVEGNADMLQSNEQLDDDGWYEQLQDRRTTESSITPDESSTTPDESSTTPDESSTTPDES*
TR75035|c0_g1	1.61314	0.0552228	10.6885	0.00612893	0.0237588	0	0	0	0	0	0	0	0	0	0	0	GTCCAATCCTTCTAAGGCAGCTTCTACAAAAGTGAAAAAAAGAAGGCACTTAACAATTGTCCATCAAGCAATACCGTAAGACGCGAAAGTTAGAAGCGCTAAAATAATTTAAATATTCACTAATACATTGCAGCTTTGATCAAGTTTTCGTGGGGGGGATCAGAGAAACTGTATTAAACAATCACAAGGCAAGGGAAAGCATTCCGTAAGGTATAGTAAAATTAAAAACTTCAACGCAAGAGAAATTCACAAGTCAGAAATGCAACTGTTTAATTATAAAGGACTTACCGGTTATCCATTGGTAAAGAAATT	0
TR99767|c95_g2	1.6084	0.487926	8.5484	0.0119013	0.036377	0	0	0	0	0	0	0	0	0	0	0	AGTTTGTGGCACAACTTGACTAGAAGAAGGGATCGGTTGGTAGGACATGTTCTGAGGCATCAAGGGATCACCAATTTAGTATTGGAGGGCAGCGTGGAGGGTAAAAATCGTAGAGGGAGACCAAGAGATGAATACACTAAGCAGATTCAGAAGGATGTAGGTTGCAGTAGGTACTGGGAGATGAAGAAGCTTGCACAGGATAGAGTAGCATGGAGAGCTGCATCAAACCAGTCTCAGGACTGAAGACCACAACAACAACAACAACAACAACAACAACAACAACAACAACAACAACAACATGTTGAAGGATGATTCTTTGTATTCAGTTTCATGTGCAAAACATTAATTGGTTA	0
TR64781|c0_g1	1.60779	3.94261	8.0769	0.0139191	0.0406692	TRY7_ANOGA^TRY7_ANOGA^Q:78-851,H:11-267^34.67%ID^E:3e-34^RecName: Full=Trypsin-7;^Eukaryota; Metazoa; Ecdysozoa; Arthropoda; Hexapoda; Insecta; Pterygota; Neoptera; Holometabola; Diptera; Nematocera; Culicoidea; Culicidae; Anophelinae; Anopheles	TR64781|c0_g1|m.10506	66-854[+]	TRY7_ANOGA^TRY7_ANOGA^Q:5-262,H:11-267^37.08%ID^E:3e-40^RecName: Full=Trypsin-7;^Eukaryota; Metazoa; Ecdysozoa; Arthropoda; Hexapoda; Insecta; Pterygota; Neoptera; Holometabola; Diptera; Nematocera; Culicoidea; Culicidae; Anophelinae; Anopheles	PF00089.26^Trypsin^Trypsin^32-256^E:9.6e-51	sigP:1^20^0.91^YES	ExpAA=17.80^PredHel=1^Topology=i5-24o	COG5640^protease	KEGG:aga:AgaP_AGAP008293`KO:K01312	GO:0005576^cellular_component^extracellular region`GO:0004252^molecular_function^serine-type endopeptidase activity`GO:0008236^molecular_function^serine-type peptidase activity`GO:0007586^biological_process^digestion	GO:0004252^molecular_function^serine-type endopeptidase activity`GO:0006508^biological_process^proteolysis	CCCTGACGGCGCCTGGGCGGTATAAAAGCGGCCTCGCCTCCCGCGCCTCGCACCCTGCCACCACCATGACGCCCGCAGTCCTCATCTTCGCTGCGGCGTGTCTGCTCGTTTCGCCGTCGCTGGCGGCTCCGTGGCTCAGGACACGCGGCCAGGGCCGCATCATCAACGGCACGGAGGCCGACATCGCCGACTTCCCCTGGATGGTGTCGCTGCAGATCCTGGACGACCACGTATGCGGCGCCTCCATCATCAGCAGCACGTGGGTGCTGACGGCGGCTCACTGCGTCCACGTGTGCCAGCTGTACGCCGACCGCCACAAGAGCATGCGCGCCGGCTCCTCCAGCCGGGCCAGCGGCGGCGTCCGCCTCGACGTCGCCCAGATGATCAAGCACGCCGACT…	MTPAVLIFAAACLLVSPSLAAPWLRTRGQGRIINGTEADIADFPWMVSLQILDDHVCGASIISSTWVLTAAHCVHVCQLYADRHKSMRAGSSSRASGGVRLDVAQMIKHADFQMPTDEDPDVDYDIGVIQASEPFPLGANIQVVNLAADGYDAPAGLPVTVSGWGDTGIDYDPVYLQRADMHVVDRDTCRDMLADVAPVTPRMVCAGDPTMAACHGDSGSPLVYGDTQIGIVSWSRSDCMSAAAVYADVGNLRAWVRNNTGV*
TR35585|c0_g1	1.60479	0.897242	17.8844	0.000994228	0.00994097	0	0	0	0	0	0	0	0	0	0	0	CTTTGTAAAATGTTTTGTGATTTGTAACAGAGTAGAGCACTGTGCTAGTACATTACACAAAAATTTCAGTGATTGATTTGACAAAAGTAATTAAAAGTTGTGACATGATTTTCTGAGATTTTGTACGCTGTCAAAGGATATTTTAGTATACTCGTTAGCAAAATGGTCATCATTAATTATTGCACTGAACACAAAATTGCTGTACTGTGTAATAACAACCTAGCCTATGTACATTTGAAAAGTTTAAATGGTTATTTTTAATTCATTCTATTGATGGTCCACTGACAAACATTGTAATTAAATGTTGCACATCATCACTTACCAGATTGCTGTGAATATACTTATGCATAAGTACTCATCCCTAAGTGCCCTCTGATGTAAAGCATTTCAGAAAACTCA…	0
TR52696|c1_g5	1.60464	6.90122	12.8715	0.00333048	0.0167114	PE1_ANOGA^PE1_ANOGA^Q:450-25,H:39-151^28.67%ID^E:8e-10^RecName: Full=Peritrophin-1;^Eukaryota; Metazoa; Ecdysozoa; Arthropoda; Hexapoda; Insecta; Pterygota; Neoptera; Holometabola; Diptera; Nematocera; Culicoidea; Culicidae; Anophelinae; Anopheles`PE1_ANOGA^PE1_ANOGA^Q:156-1,H:34-85^42.31%ID^E:5e-06^RecName: Full=Peritrophin-1;^Eukaryota; Metazoa; Ecdysozoa; Arthropoda; Hexapoda; Insecta; Pterygo…	TR52696|c1_g5|m.7168	1-582[-]	CHI10_DROME^CHI10_DROME^Q:24-186,H:680-848^28.81%ID^E:3e-14^RecName: Full=Probable chitinase 10 {ECO:0000312|FlyBase:FBgn0250907};^Eukaryota; Metazoa; Ecdysozoa; Arthropoda; Hexapoda; Insecta; Pterygota; Neoptera; Holometabola; Diptera; Brachycera; Muscomorpha; Ephydroidea; Drosophilidae; Drosophila; Sophophora`CHI10_DROME^CHI10_DROME^Q:29-194,H:795-926^26.51%ID^E:1e-10^RecName: Full=Probable chi…	PF01607.24^CBM_14^Chitin binding Peritrophin-A domain^39-83^E:2.1e-13`PF01607.24^CBM_14^Chitin binding Peritrophin-A domain^142-186^E:3.4e-13	sigP:1^22^0.884^YES	0	COG3325^chitinase	KEGG:dme:Dmel_CG18140`KO:K01183	GO:0005576^cellular_component^extracellular region`GO:0008061^molecular_function^chitin binding`GO:0004568^molecular_function^chitinase activity`GO:0006032^biological_process^chitin catabolic process`GO:0000272^biological_process^polysaccharide catabolic process	GO:0008061^molecular_function^chitin binding`GO:0006030^biological_process^chitin metabolic process`GO:0005576^cellular_component^extracellular region	TGAGGTTGATGCTGATCCACCTGCACAACCTGCATTTGCTGGCCAATCACATACCTCTAGAGTGGGGTTGAAGTGAAGTCCAGCAGGACAGTCGAACGTCACAGGTTTTCCATGGTCACATTTGCAGAACTGACTGCAGTTTGAGGCATGCGGAAGGTGCTTAGCAATAGAATTCTCATCTTCATTTTGTGGACATGTTCCGACAGCTGGGCAGTCTCCTGATGGAGCAGGTTTAGCTGTTGAACTTGGAGCAGATGTTGGAGCAGCGGTAGTGGCAGCACTTGTAGGAGGAGCTGTGGAGCTGGGAGCTGAGGTTGATGCTGATCCACCTGTGCAACCTGCATTTGCTGGCCAGTCACAGACTTCCAGTGTAGGGTTGAAGTGCAACCCGTCAGGACA…	MNLRASALTTVLVLIATAAVHASPVGDCPPVDPVDHTDHLPDSQNCSLFYKCDHAAPVLFVCPDGLHFNPTLEVCDWPANAGCTGGSASTSAPSSTAPPTSAATTAAPTSAPSSTAKPAPSGDCPAVGTCPQNEDENSIAKHLPHASNCSQFCKCDHGKPVTFDCPAGLHFNPTLEVCDWPANAGCAGGSASTS
TR57541|c0_g1	1.60312	1.05322	21.3108	0.00048861	0.0079485	0	0	0	0	0	0	0	0	0	0	0	TTTTTTTTTGTTGTTAATAAACTTTATTTGACTAGATAGCTATTAACGTTTTATTACATAAATACAAAATCTGTAAATGGTAGGTGCATTTACTACTGCGCCATTTTCTTAAGGCCCTCACGTAATTCTTTCAGGCTTTCTACGTATTTTGGGTGAGAACTTTCAACACGTGGAAGCCACTCCTTGATGTTAGGCTGCTTCGTAGGGTCAATTCCACTTTCTGGAACAAACTCTAATACCGACAAAGAATTGGCGACCGCGTAATCAGCAAGTGTGATCTTGTCTCCAGCTAGCCACG	0
TR79714|c0_g1	1.60297	6.49184	10.4876	0.00650345	0.0246404	ERG3_NEUCR^ERG3_NEUCR^Q:2168-1602,H:145-326^27.89%ID^E:9e-09^RecName: Full=Probable Delta(7)-sterol 5(6)-desaturase;^Eukaryota; Fungi; Dikarya; Ascomycota; Pezizomycotina; Sordariomycetes; Sordariomycetidae; Sordariales; Sordariaceae; Neurospora	TR79714|c0_g1|m.14261	1515-2795[-]	ERG3_NEUCR^ERG3_NEUCR^Q:210-398,H:145-326^27.89%ID^E:4e-17^RecName: Full=Probable Delta(7)-sterol 5(6)-desaturase;^Eukaryota; Fungi; Dikarya; Ascomycota; Pezizomycotina; Sordariomycetes; Sordariomycetidae; Sordariales; Sordariaceae; Neurospora	PF04116.13^FA_hydroxylase^Fatty acid hydroxylase superfamily^230-360^E:1.9e-23	0	ExpAA=110.42^PredHel=5^Topology=i71-93o133-155i185-207o222-244i291-313o	0	KEGG:ncr:NCU06207`KO:K00227	GO:0005789^cellular_component^endoplasmic reticulum membrane`GO:0016021^cellular_component^integral component of membrane`GO:0000248^molecular_function^C-5 sterol desaturase activity`GO:0005506^molecular_function^iron ion binding`GO:0016126^biological_process^sterol biosynthetic process	GO:0005506^molecular_function^iron ion binding`GO:0016491^molecular_function^oxidoreductase activity`GO:0008610^biological_process^lipid biosynthetic process`GO:0055114^biological_process^oxidation-reduction process	ACATTAAAAGTAATTATTCTTTATTTATATAATTGGTAAACCAATATTCTACAGCATTGTAGTCGTTTTCAAATCTGGTGACGTTTTAATACGTTACAGTTGAATTAGCGTACATAGTATATCGTGATGAGTAAAAACTGAATCAGTTTTGTGAAACCAAATTCTGTGTCACATAAATTGACACTTAATACAATACTTGTATTGCGTTGCTACTGAAATAAGCAAAGAAAATGAAATCTCTGGGGACAGTACTGACGGTGCGAAACATGTGAAGGGCTTATTTCAATGGGGGGTTAAGTCCATTATCTCCACTTTTCTGTCTGTAATGCTTCTGAAATTAATGAGCCAAACAAACAGAAAGAAAGGTTCATCTGTAGCAAGAAGCCATATGGTTGGATA…	KGVSNGAAKGVSNGAAKGVSNGAAKGVSNGAAKTVENAADQPGKFFDPMAVTWMEKYNAPMEKIWSRLPSFVRSTIVTLAVFILGATMRGEWLLTAVHTARYLGWELGDGSEGWDFSWQNLSLEALRLKNLRVYWLVASFVSYFMYFSIGGFLHWYFYVRQRDRPEEWKCQPTKFLSPELERHEILVGSFSLLITSSFTATLACYISNGGWSRVYYEFDEYGWTWWFLQWAVIFIYQDYATYWLHRIYHTPFLYKHFHKLHHKYKQPTAFSVTAIHPVEIMHIQITLCLPLFVIPCHFVPFCGVALYTYYHGIIDHSGINFKAYWWQPWQPDAIFHDNHHQYFHVNFAFNIYIWDKLHGTYRQKDRLYTEDTFYGRGKALSEATEEERQQDLTERLSEN…
TR80335|c0_g1	1.60154	3.19884	9.07471	0.0100396	0.0325612	0	0	0	0	0	0	0	0	0	0	0	TTATATAACTGACAGAGTAACTCAATGTGGGTGGATGGGCACGAGAAAGAGGGGCTGTTCTATCTATTGCAGGTTCAGTACTTCAGCCACTATGCGAATCGTAATGCTAGCGAGAGAACTCCATCTTCCCCAAAAGACATACGACGGAATACAATGATTATATTATGGAACATTATTTGTGAATTTTTCAGAAAAATTATAAAGCTGCTTAAAACCCTGTGATCTGGAAACAATTCTTCTACATCCCACAAAAAAAGAAATAGTATGTAAACGACATTACATAACTTCTAGGAAAAGCCAAAGACACATTGTTCACTTGCTCATCACTGAGGAAACTGTCTAACGTTTTACACTATCATTAAATAATTTTGCAATGAACCATAACAATGTGTACAACTG…	0
TR46800|c0_g1	1.60098	0.963169	13.4439	0.00286524	0.0154719	CEX2_CAEEL^CEX2_CAEEL^Q:785-570,H:114-189^32.89%ID^E:1e-07^RecName: Full=Calexcitin-2;^Eukaryota; Metazoa; Ecdysozoa; Nematoda; Chromadorea; Rhabditida; Rhabditina; Rhabditomorpha; Rhabditoidea; Rhabditidae; Peloderinae; Caenorhabditis	0	0	0	0	0	0	ENOG4111I7F^calcium ion binding	KEGG:cel:CELE_T09A5.1	GO:0005783^cellular_component^endoplasmic reticulum`GO:0005509^molecular_function^calcium ion binding`GO:0017156^biological_process^calcium-ion regulated exocytosis	0	GTTTGCTAATGTCTTTCCTTTACTTTCAACATCTCATATAAATACAAAATATTACACATTATAAAGTACTACATATTCTGTACCACTCTATTACATTAAATAAAACAGTTATCCGGCATATTTGTAAAAATACAATTTCATTTTAACAGAGGAACTTGAGGAAGAATTATGTGACAGGTCCATATAAAGTTAACAGTGTGTGTGTGAGGAACTTTAATGGCGAACATAACTTTGATAACAGAACGAAAACAACAGTGATACTTTTTACAGTTTTACAGCCCTTTGGTATATGTTGGATGGAGTTAATGAAGTTAGGGCCATGGACGTGTGGAGGAGGCAGCTGAACAGGTGACCCTGCCTGGTGGGCAATGCACACATATGGATACCATTGCTGTCCCT…	0
TR26110|c0_g1	1.59674	1.08905	20.06	0.000627518	0.00866068	0	TR26110|c0_g1|m.1866	1-360[+]	0	0	0	0	0	0	0	0	GCCGAAATGGTGTCAAATCAAAATACTTCACCCAGTGAACAGTCTACCCGACGGGAGGCCCTAGTCCCACAACATTTACATTTTAGCAGAGAGATCATAGCAAGATACCATACAATGCAACTGAGAACAGATGATACAATTCACCGCCTGTGTTCCATAAAAGAAATTCACCTGGAGTATGCCACTTCACATTTCAATTCATTTTCTGCTGTGGATTTCTGTCAACAGCTAACTTCTGTATATATCCATCAATTTTATGAAAAGAATAGTTGCTACTCACAATATAGCAGAGATGCTGAGTCACTGATAGGCACAACAAAAAGACTGTCAGAATGTGGGCTTTCGGCCAACAAGGCTTTTCT	AEMVSNQNTSPSEQSTRREALVPQHLHFSREIIARYHTMQLRTDDTIHRLCSIKEIHLEYATSHFNSFSAVDFCQQLTSVYIHQFYEKNSCYSQYSRDAESLIGTTKRLSECGLSANKAF
TR23979|c0_g1	1.59591	1.2235	11.3193	0.00510637	0.0214024	0	0	0	0	0	0	0	0	0	0	0	TTTTTTTTTATAATCAAACATCTTGCTTTACTTCTGTTTTCACAGAGTTGGAAATACTCCAACACACATAAATAAAATATTTAGAAACAACAATTCAAAATCTTCTTTGTCAAAAATAATGTATAAAAACAACGATAATACTTCGCAATGCGAGCTTCCAAAATGGTAGCCGACTAAGTAGGCACAGCAAAGTGAAAAATCAGTCTTCAGAGAAAAATATGAGCAACATGGATGAACTGAAGATGAGTACAACATGGATGAACTGAAGATGAGTACAACATGGATGAACTGAAGATGA	0
TR65119|c0_g1	1.5924	4.09332	14.2351	0.00234081	0.0140168	LIPH_XENTR^LIPH_XENTR^Q:179-820,H:47-271^38.22%ID^E:5e-40^RecName: Full=Lipase member H;^Eukaryota; Metazoa; Chordata; Craniata; Vertebrata; Euteleostomi; Amphibia; Batrachia; Anura; Pipoidea; Pipidae; Xenopodinae; Xenopus; Silurana	TR65119|c0_g1|m.10565	29-820[+]	LIPHB_XENLA^LIPHB_XENLA^Q:29-264,H:25-271^36.69%ID^E:3e-44^RecName: Full=Lipase member H-B;^Eukaryota; Metazoa; Chordata; Craniata; Vertebrata; Euteleostomi; Amphibia; Batrachia; Anura; Pipoidea; Pipidae; Xenopodinae; Xenopus; Xenopus	PF00151.19^Lipase^Lipase^45-262^E:2.3e-52	sigP:1^17^0.919^YES	0	0	KEGG:xla:447716`KO:K19404	GO:0005576^cellular_component^extracellular region`GO:0016020^cellular_component^membrane`GO:0052689^molecular_function^carboxylic ester hydrolase activity`GO:0016042^biological_process^lipid catabolic process	0	AGGGCAGATGAAATGCCAAGCAGTCATCATGGGTCACAAGCTGCTGTTGCTGTTTCTGTTAATAGGTCTTACCTGTGCACGTGAAGAGAGATGGGAATTAATTCCTGGAGGTGATGGAAAATTGCATTTGGTTGACCTGAATCGTGACACTGAACTTCTTGCTGTAAGTGACAGTGATGTGTCTTTCCGCCTTTACACACAGTCAAACCCAACAAGTCCCCAGTATGTGACGATTGGAGATGCCTCTTCTCTTGGTTCCTTCAGTGCTTCACGTCCCACAAGATTTGCAATTCATGGGTGGCTAGCTAGTGAGGACAACTTAGTGGCAATACGTAATGGTTGGATACAGGCTGGAGATTACAATGTAATAATGGTGGACTGGAGAGGACCAGCAAGCAA…	MGHKLLLLFLLIGLTCAREERWELIPGGDGKLHLVDLNRDTELLAVSDSDVSFRLYTQSNPTSPQYVTIGDASSLGSFSASRPTRFAIHGWLASEDNLVAIRNGWIQAGDYNVIMVDWRGPASNILYAPARNAVPEVGQIVARFIDFLVQQGANAGNMEVAGHSLGAHVAGIAGNRAAATIGRIIAMDPAAPLFGGTAAADRVDSSDAAFVEVIHTSTLGWADPLGHADFFPNGGTFQEGCSAIDLECSHNRSYELYAESITSS
TR42015|c0_g1	1.58715	2.52673	13.1165	0.00312131	0.0161252	MYORG_MOUSE^MYORG_MOUSE^Q:1145-30,H:79-471^32.99%ID^E:2e-50^RecName: Full=Myogenesis-regulating glycosidase;^Eukaryota; Metazoa; Chordata; Craniata; Vertebrata; Euteleostomi; Mammalia; Eutheria; Euarchontoglires; Glires; Rodentia; Myomorpha; Muroidea; Muridae; Murinae; Mus; Mus	TR42015|c0_g1|m.4302	3-1208[-]	MYORG_MOUSE^MYORG_MOUSE^Q:22-393,H:79-471^32.99%ID^E:2e-54^RecName: Full=Myogenesis-regulating glycosidase;^Eukaryota; Metazoa; Chordata; Craniata; Vertebrata; Euteleostomi; Mammalia; Eutheria; Euarchontoglires; Glires; Rodentia; Myomorpha; Muroidea; Muridae; Murinae; Mus; Mus	PF01055.26^Glyco_hydro_31^Glycosyl hydrolases family 31^241-389^E:6e-18	sigP:1^20^0.895^YES	0	COG1501^hydrolase, family 31	KEGG:mmu:329828	GO:0005789^cellular_component^endoplasmic reticulum membrane`GO:0016021^cellular_component^integral component of membrane`GO:0031965^cellular_component^nuclear membrane`GO:0004553^molecular_function^hydrolase activity, hydrolyzing O-glycosyl compounds`GO:0005975^biological_process^carbohydrate metabolic process`GO:0043568^biological_process^positive regulation of insulin-like growth factor recept…	GO:0004553^molecular_function^hydrolase activity, hydrolyzing O-glycosyl compounds`GO:0005975^biological_process^carbohydrate metabolic process	CTCAGGTCTAAGGGTTCGATGTCGGGCAGCTGGGGCAGCCAGCTGGTCTCACCCGCATCGAACTTGAACGAATCGATCCCTGTCTCGTTTTTTAGTGCCCAAAGCCTATTGGCCCACCAGGCTGCCGCTTCAGGGTTTGTGAAGTCGATGACGCTGCCTTCGCCATTCCACCAGGAGGTATTGGCGCTGCCTTCGGTATTGGTGACGAAGTATCCACTAGCGAGGGCCTGAGAATGGTACGGCTCGCAGTCGAGGTTCACGAAGGGGTGGACCCAGAGGGTGACGCGGAATCCCAGGTCGTGCAGATCTTCTGTGAGTTTCCTCACGTCGGGGAACTTGGCCGTGTCGAACGTCAAGCTCCCGTAGCAGGTTTCCCACAGGTCGTCTATCTCGAGCTGG…	MRALLLVSSLFVLMMTSAAADVSTRYDESTGRIVVSIERGGDNVDVESVTVLGYEGAPSICDNAGLDEDCFQFQESRIVVERSQRDGGVCYRFSASYDIPGIIVENCIPHNGSHLYGGPEQYNQYWPIESNVYSNYSYVTKQQDNVGIAERYWLFSDGRYVHAQPNMPLFINQNINDSVGWLCLAAEKAPPYSLERSGIVLNKTTCVFEDARQAHEDAVDRYLGRPSGIPDERMTTHPIWSTWARYKRDIDDSTVRQLAAEIVANGFNNSQLEIDDLWETCYGSLTFDTAKFPDVRKLTEDLHDLGFRVTLWVHPFVNLDCEPYHSQALASGYFVTNTEGSANTSWWNGEGSVIDFTNPEAAAWWANRLWALKNETGIDSFKFDAGETSWLPQLPDIEP…
TR57399|c0_g1	1.57727	2.32064	7.75211	0.0155431	0.0437024	MA2B1_MACFA^MA2B1_MACFA^Q:124-3012,H:52-1008^45.82%ID^E:0^RecName: Full=Lysosomal alpha-mannosidase;^Eukaryota; Metazoa; Chordata; Craniata; Vertebrata; Euteleostomi; Mammalia; Eutheria; Euarchontoglires; Primates; Haplorrhini; Catarrhini; Cercopithecidae; Cercopithecinae; Macaca	TR57399|c0_g1|m.8644	40-3036[+]	MA2B1_MACFA^MA2B1_MACFA^Q:29-991,H:52-1008^46.12%ID^E:0^RecName: Full=Lysosomal alpha-mannosidase;^Eukaryota; Metazoa; Chordata; Craniata; Vertebrata; Euteleostomi; Mammalia; Eutheria; Euarchontoglires; Primates; Haplorrhini; Catarrhini; Cercopithecidae; Cercopithecinae; Macaca	PF01074.22^Glyco_hydro_38N^Glycosyl hydrolases family 38 N-terminal domain^42-358^E:2.7e-94`PF09261.11^Alpha-mann_mid^Alpha mannosidase middle domain^363-456^E:2.6e-24`PF07748.13^Glyco_hydro_38C^Glycosyl hydrolases family 38 C-terminal domain^583-799^E:5.8e-47`PF17677.1^Glyco_hydro38C2^Glycosyl hydrolases family 38 C-terminal beta sandwich domain^885-985^E:1.4e-11	sigP:1^16^0.885^YES	0	0	KEGG:mcf:102137710`KO:K12311	GO:0005764^cellular_component^lysosome`GO:0004559^molecular_function^alpha-mannosidase activity`GO:0030246^molecular_function^carbohydrate binding`GO:0046872^molecular_function^metal ion binding`GO:0006013^biological_process^mannose metabolic process	GO:0004559^molecular_function^alpha-mannosidase activity`GO:0006013^biological_process^mannose metabolic process	ACCAGCTGTTGAGCAACCATCAGTGTAAATTTTATAAACATGTATTTAATATTAATATTATTAGTATTACCAATTTTCACAACATCTCTTCCTGTCAAAAATGCCAAAGAAGAGTCTACATGTGGTTACAGTGCATGCCATGCAACTAAACCAGGCTACATTAATGTTCATATCATACCTCATTCTCATGATGATGTGGGATGGCTAAAGACAGTTGATCAATACTACTATGGAAGCAAGCAGGCAACACAAAGAGCAGGAGTACAGTACATAATAGATACCATGTTGAATGAACTTAGGAATGATCCTGACAGAAGGTTCATTTATGTCGAGACAGCTTTCCTGTGGAAATGGTGGTTAGATCATAGTGAGGCTAAGCGACAGCTAATGATAGACTTC…	MYLILILLVLPIFTTSLPVKNAKEESTCGYSACHATKPGYINVHIIPHSHDDVGWLKTVDQYYYGSKQATQRAGVQYIIDTMLNELRNDPDRRFIYVETAFLWKWWLDHSEAKRQLMIDFINSGQLEIIGGAWSMNDEAATHYQSTIDQFTWGLRKLNDTFGACGRPHVGWQIDPFGHSREMASIFAQLGYDGVFFARSDYQDRQRRYQTRNTEMIWQGSANLGTSSRLFAATFNNSYYPPSGFCFDINCDDLPIIDDLKSPDYNVKTRISDFVAYIEEQATHRKTDHILVTMGGDFHYQEAAAWFVNLDKLIKYVNDLQADGGRLNALYSTPSCYLKAVNEANTTWELKEDDFFPYASDSHEYWTGYFTSRATSKYFERRGNNFLQVCKQLYALADVE…
TR44400|c0_g1	1.56483	2.33864	28.6328	0.000133775	0.00694482	0	0	0	0	0	0	0	0	0	0	0	GTGATGTCCTTAGGTTAGTTAGGTCTAAGTAGTTCTAAGTTCTAGGGTTCTAATGACCACAGCAGTTGAGTCCAATAGTGCTCAGAGCCATTTGAACCATTTGGTTTTCAGAACTTTTCCTAGTTACATATTTTGGATACTGTTTTGCGGAACATGTCTTGCGATAGCACTTTACCTTAGTCTATAATCCTGTTCTGATTATATCATCTTGTTTCTTGTGGTAGCTAGCGATTTTCCCTGGAATGGATTCGTTTCTGAGATATCAACAAGTGCTAAGTGTGGCTCTGTATGGTGTGGTGCTACCTAACCAACATATAACCCTCCCCCCATTCCGACTCTGTACCCTCCACATCTCAATTCTGGGCAACATCAGCAGAATCCCTCTCCCAAATTTTGGAA…	0
TR52322|c0_g2	1.56321	1.05863	13.9881	0.00249156	0.0144045	0	0	0	0	0	0	0	0	0	0	0	ATATCCCCTATTTTTGAATGGGCTGGTCCCAAACAATCAAACGCTGTGTAGACTAACATTCAAATAATCTGTAGACTTGACTGAAGTTGTTTGAAATACCAGAACAATTTTTATGACTGTGAAATAATGTCAATGATGTATTGTGATATTTATGATATTAGTTATTTGTGATGCACTTCATCGTTGTGGGGACTTGGGGTTATTACAATGCTGATGAACTGGGTATGATTTGGAGAATGGAGACAATACTATAGGAGAAATGTTTTATGTGTGTAATGCAAAGAAAAACATTCGAGTAATTGCGAGGTACTTGTGAGGAGGATAGGAAGAAGCCAAGGAAGAAAGGTGTTGATGTTGGCAGTATTTTCCGGTGAAAATTCTTGGGTGCGTTATGGGTGG…	0
TR84113|c0_g1	1.5585	5.03709	18.858	0.000805833	0.00925602	PGRP1_HOLDI^PGRP1_HOLDI^Q:161-670,H:31-197^40.59%ID^E:8e-41^RecName: Full=Peptidoglycan-recognition protein 1;^Eukaryota; Metazoa; Ecdysozoa; Arthropoda; Hexapoda; Insecta; Pterygota; Neoptera; Holometabola; Coleoptera; Polyphaga; Scarabaeiformia; Scarabaeidae; Melolonthinae; Holotrichia	TR84113|c0_g1|m.15602	2-760[+]	PGRP1_HOLDI^PGRP1_HOLDI^Q:54-223,H:31-197^40.59%ID^E:1e-42^RecName: Full=Peptidoglycan-recognition protein 1;^Eukaryota; Metazoa; Ecdysozoa; Arthropoda; Hexapoda; Insecta; Pterygota; Neoptera; Holometabola; Coleoptera; Polyphaga; Scarabaeiformia; Scarabaeidae; Melolonthinae; Holotrichia	PF01510.25^Amidase_2^N-acetylmuramoyl-L-alanine amidase^79-206^E:1.3e-20	sigP:1^26^0.665^YES	0	0	0	GO:0005576^cellular_component^extracellular region`GO:0008745^molecular_function^N-acetylmuramoyl-L-alanine amidase activity`GO:0042834^molecular_function^peptidoglycan binding`GO:0008270^molecular_function^zinc ion binding`GO:0045087^biological_process^innate immune response`GO:0009253^biological_process^peptidoglycan catabolic process	GO:0008745^molecular_function^N-acetylmuramoyl-L-alanine amidase activity`GO:0009253^biological_process^peptidoglycan catabolic process	TGGAGACGTAATGGCAGGGCAGACGAGGTTCCGAGCGGCGCTCCTCGTAGCGGTTCTGCTGGCCGCGAATACGGCGGGTGGCATTCCGCGTCGGGACCCTCGATATCATATCCAGGGACTCTCCGCAAATAGCTCCGAAAACGTGGCTGAAGACTCGCCTTGCCCCCGCATTGTCAGCCGCGAGGAGTGGGGCGCTCGAGACCCATTGGTCCCTCACGAGAACCTGACCATCTCGCCAGTGCCATACGTTGTGGTCCACCACGGCGGCATTCAGGAGTACTGCTTCGACGAGGAGGCGTGTGCTGCCATCGTACGCTCCTACCAGGACCTGCACATGGACACCAACGGCTGGGACGACATCGGATACAACTTCCTGGTGGGCGAGGACGGCAACGCCTA…	GDVMAGQTRFRAALLVAVLLAANTAGGIPRRDPRYHIQGLSANSSENVAEDSPCPRIVSREEWGARDPLVPHENLTISPVPYVVVHHGGIQEYCFDEEACAAIVRSYQDLHMDTNGWDDIGYNFLVGEDGNAYEGRGWDARGAHAPGYNQQSIGICVMGDFSDRLPNDAAMETLQNMMACGVSLGKISDSYLVLGHRQVKATLCPGDQLYAWVTQLPNWTDDPQPCEDEVCPDPPVGSRLRTNPHSSLLSRR*
TR84160|c0_g2	1.55665	3.54277	15.7366	0.0016225	0.0119054	CP6J1_BLAGE^CP6J1_BLAGE^Q:1119-4,H:23-373^32.8%ID^E:2e-66^RecName: Full=Cytochrome P450 6j1;^Eukaryota; Metazoa; Ecdysozoa; Arthropoda; Hexapoda; Insecta; Pterygota; Neoptera; Polyneoptera; Dictyoptera; Blattodea; Blaberoidea; Ectobiidae; Blattellinae; Blattella	TR84160|c0_g2|m.15628	1-1179[-]	CP6J1_BLAGE^CP6J1_BLAGE^Q:12-392,H:13-373^32.98%ID^E:1e-68^RecName: Full=Cytochrome P450 6j1;^Eukaryota; Metazoa; Ecdysozoa; Arthropoda; Hexapoda; Insecta; Pterygota; Neoptera; Polyneoptera; Dictyoptera; Blattodea; Blaberoidea; Ectobiidae; Blattellinae; Blattella	PF00067.22^p450^Cytochrome P450^37-391^E:2.9e-48	0	ExpAA=29.31^PredHel=2^Topology=o4-23i219-241o	0	0	GO:0005789^cellular_component^endoplasmic reticulum membrane`GO:0020037^molecular_function^heme binding`GO:0005506^molecular_function^iron ion binding`GO:0004497^molecular_function^monooxygenase activity`GO:0016705^molecular_function^oxidoreductase activity, acting on paired donors, with incorporation or reduction of molecular oxygen	GO:0005506^molecular_function^iron ion binding`GO:0016705^molecular_function^oxidoreductase activity, acting on paired donors, with incorporation or reduction of molecular oxygen`GO:0020037^molecular_function^heme binding`GO:0055114^biological_process^oxidation-reduction process	ATGGAAGTTGACAGGTGGATACATCCGCAGCGCCTCATTGACGACGTTGGTGAGGTCCGTCATTTCGTTGAGGGCTTCGTATGTGGGCTGACCGCCGTGCCTCTTCAGCACCTGCCGCACGTGCTGGCGTACCTCTTCCTGCAGCTCTGCGTTCCGCGCCAGCTCGTACAGACAGAAGGACATAGTCGAGGACGAAGTGTCGAACCCGGCGTTGAGGAAAGACATCAGCTGGCCTGCGATGAGCTCGTTCGTAAGTTTGAGTTTTTTGTCTCCTGCCTTCGCTTTCTCGTTTGCAATATCTTCCTGAGAGTCCTCGTCATCAGAAAGTCTGTCTTCCTTGATTTTCAAGAGCAGATCAACCACATCGTTCCGTACGATGCCGTGTTCTTTCCGGTGCTC…	MTLVTGSWLLDAVLLLVPLLYWYMTRNFGYWKKLGIPYWKPTPFVGNVGSVVLGQKHMGEPVLECYHMAGDARFMGMFAFDQPLLMVKDPVLVGRIMSTDFSTFYATNAKIDPVADPVIGMSLFGQHGPGWKKLRTVLSPAFTSGKIKLMFHLVNEVGQNLTRLLETEASKGSAVELKDVMGRYTTDVVCSIFMGVNAGSLEDPNSQLRVNLRDILRENLVGRILTTLLFFAPKLMSFLHIRAGSKKTEDYFVQNTGKLIEHRKEHGIVRNDVVDLLLKIKEDRLSDDEDSQEDIANEKAKAGDKKLKLTNELIAGQLMSFLNAGFDTSSSTMSFCLYELARNAELQEEVRQHVRQVLKRHGGQPTYEALNEMTDLTNVVNEALRMYPPVNFH
TR77444|c0_g1	1.55501	3.61921	23.064	0.000349541	0.00741927	TM205_XENLA^TM205_XENLA^Q:1402-1148,H:7-91^37.65%ID^E:3e-09^RecName: Full=Transmembrane protein 205;^Eukaryota; Metazoa; Chordata; Craniata; Vertebrata; Euteleostomi; Amphibia; Batrachia; Anura; Pipoidea; Pipidae; Xenopodinae; Xenopus; Xenopus	TR77444|c0_g1|m.13693	1124-1504[-]	TM205_XENLA^TM205_XENLA^Q:35-119,H:7-91^37.65%ID^E:5e-11^RecName: Full=Transmembrane protein 205;^Eukaryota; Metazoa; Chordata; Craniata; Vertebrata; Euteleostomi; Amphibia; Batrachia; Anura; Pipoidea; Pipidae; Xenopodinae; Xenopus; Xenopus	PF13664.6^DUF4149^Domain of unknown function (DUF4149)^47-109^E:3.2e-17	0	ExpAA=60.84^PredHel=3^Topology=o5-25i38-60o80-102i	0	KEGG:xla:444019	GO:0016021^cellular_component^integral component of membrane	0	TTTTTTTTTTTTTTTTTTTTTTTTTTTTTTTTTTTTTTTCAACTTGATAACGCATCATTTTATTACAAAAATTATATAAAAATTTTCTTGTCTGCAGCTTTCTCTTTAAATGACAAAATAATAAATAAGTTAACAGAACAAGGAACATATACAAATAAATTACAATGAAATGCACAACAGACTGACATGGAACATGACTAGATTAATCATGTATTCAAGACATGCTTCTCTCTTCAGATTTCAGTTAAGAAACCTCAAGGACAATGCTTACTGTCTTATTAATCAATGATTGTTATGACTTCACTGAAAAATAAATCATATCTTGATCTGAAACAGGAACTCTACCAGGCTATATTGCCTCTAAGATAAATTAAACATTCCAGTGACCAAGAGATGATG…	MFQTTQPAHVITIVAVSVVASLVCNKNNTANSFRPSPWINLLYLGAFMTHFGAQMWMTFVSGLTLYFEIPRHTFGVVQKVLFPKYFSLNSFLSMITLFLFVRLHPRSEWDSSIGFQVCLHTNRIYG*
TR58677|c0_g1	1.55072	1.74396	19.4229	0.000715592	0.00897695	0	0	0	0	0	0	0	0	0	0	0	TGGACGCCTTTCGTGCACAGGCAGACGCTTCCCTTCCTGCTGTGTGGCCCGTTAGTTCCGGTCACTGTTCTGTGGTGCTACCGACTTGACCCAGCGCGGCAGCCGTCTCGTACCGTCAAAGAATTCTACCGGCAATATATTCAGTTACAGTGAACGTGGCCCGTAAACTGCATACAGACCATCTGTTCTCAGATTTGTGAAGTAGATTTTTCTGCGTCGGAGGCAGTGCATTTTAGAATTTCAGGTTGGGGGAATCATGAAGTACAAACAACCGCTCGGAAGTGATATATAGCAGGAGGCAGCGAGCCCGGAACAGCTGCGACGAACGCGCAGCTAATGCCACAACTGCGACGACGCGACTACACCCCGAGCAACGCAACAGTGTAGCAGGCGAGATGG…	0
TR56550|c0_g9	1.5467	8.77988	16.5355	0.00134626	0.011048	G12_ANOGA^G12_ANOGA^Q:1-333,H:90-205^31.03%ID^E:4e-16^RecName: Full=Protein G12;^Eukaryota; Metazoa; Ecdysozoa; Arthropoda; Hexapoda; Insecta; Pterygota; Neoptera; Holometabola; Diptera; Nematocera; Culicoidea; Culicidae; Anophelinae; Anopheles	TR56550|c0_g9|m.8288	1-336[+]	G12_ANOGA^G12_ANOGA^Q:1-111,H:90-205^31.03%ID^E:4e-16^RecName: Full=Protein G12;^Eukaryota; Metazoa; Ecdysozoa; Arthropoda; Hexapoda; Insecta; Pterygota; Neoptera; Holometabola; Diptera; Nematocera; Culicoidea; Culicidae; Anophelinae; Anopheles	PF06757.13^Ins_allergen_rp^Insect allergen related repeat, nitrile-specifier detoxification^2-106^E:9.9e-32	0	0	ENOG410Y27Q^protein G12 precursor	KEGG:aga:AgaP_AGAP006187	0	0	GAGTCCGGCCTCGATGTCTACAAATACGTGAACGCTCTACACGACTTCCTGGGACTGCCCCAGCTTACCCCTCCATCCAAGCTGAGACGCGCCAGGAGCATCCGTTCCATGGTCGACGAGATTCTCGCCATCTTGCCATTGGAAGAACTCCGGGCTCTGTTCGACGAGAAGCTGGAAACCAGCCCCGACTTCAAGGAGCTGTACGACAGGATCAGGTCTCCCGAATTCCAGTCGATCGTGGAAACTCTGAACTCGCTGCCAGAGTACCAGGAGCTGCTCCAGAAACTGAGGGACGCTGGCATCGACGTCGACGCATTCATTGACCTGATTCGCGGTCT	ESGLDVYKYVNALHDFLGLPQLTPPSKLRRARSIRSMVDEILAILPLEELRALFDEKLETSPDFKELYDRIRSPEFQSIVETLNSLPEYQELLQKLRDAGIDVDAFIDLIRG
TR93863|c0_g1	1.54663	2.71706	13.932	0.00252735	0.0144976	0	0	0	0	0	0	0	0	0	0	0	CGGTATATTCACTGAGGCGTACGGCACGCGCGGTTAACAATCATACGACACTGCGGAGAGACTTTTTGAACACCCCATACAAACTGGGATATAGAGCGTAGTGTCCATTTATATGTAGCGGATAGAATGTCTCATGTCTTTAGAGCCAAATTACACAAAAGGTACAGGATCTTAAACTGAGTTCATCTGAATAGTAGTGAGAGGGTCGCAAATGAAGATTTTATCTTTTACTGATACACGTAAGTTACACCTCATAGCAACAACTTAAGCTCGTAACAGTTGTTCAGTGTTACAACAACCCATCCCAAAGCATCCATTTTAATTAATCCGTTGACAAAACAAAAGTCTTCAAAATCATTAGATCCCGTTACTTGCACATGTTGTTTATGATAGGAGTGT…	0
TR106972|c0_g2	1.54096	5.04252	8.71561	0.0112692	0.0351091	0	TR106972|c0_g2|m.1472	708-1637[-]	F120A_MOUSE^F120A_MOUSE^Q:38-306,H:557-839^26.51%ID^E:3e-09^RecName: Full=Constitutive coactivator of PPAR-gamma-like protein 1;^Eukaryota; Metazoa; Chordata; Craniata; Vertebrata; Euteleostomi; Mammalia; Eutheria; Euarchontoglires; Glires; Rodentia; Myomorpha; Muroidea; Muridae; Murinae; Mus; Mus	0	0	0	ENOG410XPY7^family with sequence similarity	KEGG:mmu:218236	GO:0005829^cellular_component^cytosol`GO:0005634^cellular_component^nucleus`GO:0005886^cellular_component^plasma membrane`GO:0003723^molecular_function^RNA binding	0	TTTTTTTTTTTTTTTTTTTTTTTTTTTTTTTTTTTTTTTTTTTTTTTTTTCTAAAAATTATTTCATTTTATTAAGTTCATTTCTGTACATTCATATTATTACAATAAGAATACAAAAACATAAAATATAGTCCAACATTTCATTTCACTCAACAATATATCTGTATGTTATTACCTCTGTATTTCATAAATATATTTTTGCTGACTGTAACAGTTAAAATCTGGAGTTATAGAGAGAGGCTAAAACTATATCAAATAAATTAACAGCATGTATCTATAAAATATAAACATTTGTTTGATTAAATTTCTTATTTTGATTAACTGATGTGTGAGAGAGGGGAAAAATGAGGAAACTGCCACCAGTTCCACATGCAGAATGTTGAAAGTAACAACTGTTACC…	MCKIVFHGKWRDALPMVEAGIRSYSYEPTSWENLVAHVEDKHSSGEIPGTLLSVMKRQVFRIGEVLEDLSETKQDFPTTGLVLRPMRARMYKVLLWESDCGLCRVTEYLLTETGKVRKEEVEVEKRLPAGMEHPGLLQLWTSDNAQRRWRFFTWLVAPYAKPSLLEELDPQFLVVPAAALLFLKHEARVLHDHEVAAFCATAAAVAGLPATGQPANIVKTLDERAIYLASLFMRCVLHVLDAAATCGIAFPREIDCLPDAYFDGIVFHNICVTTRNGKDPKTLDMFKPQHEVKFEQLMRVIKWNQSKNP*
TR19878|c0_g1	1.53945	1.07837	14.5989	0.00213767	0.0134517	0	0	0	0	0	0	0	0	0	0	0	AGTGAAATACCAGTAATTAATTTATTGAATATTCATTTTACTGAGATAAACGAAACAGTAGAATGTTGGGAGAGATCACTTGAAGCGAAGCAACCCAAGCAGGCGAACAATCAAACGGTACGCGCGGCTGAGCGGAGAGACTTTTTGAACAATCCGTATAATTGTTATAAGCAGACAGTATTACAGCAATTATCAGTGTCATTGTACAACGAAAAAATTTATTATTGATCGAACTCACTTGCACATTTAAATATTTTAGCGCATAGCCTCATTAAGAGACCGATTTACATGCCAGGTTATATGTCTTACCGATTTAGAGTTACACTCCGACACTGACGAGCTCTTGGCAAAATATAT	0
TR93365|c0_g1	1.53934	0.109713	46.2023	1.29687e-05	0.00694482	BGLR_MOUSE^BGLR_MOUSE^Q:87-251,H:29-86^46.55%ID^E:2e-11^RecName: Full=Beta-glucuronidase;^Eukaryota; Metazoa; Chordata; Craniata; Vertebrata; Euteleostomi; Mammalia; Eutheria; Euarchontoglires; Glires; Rodentia; Myomorpha; Muroidea; Muridae; Murinae; Mus; Mus	0	0	0	0	0	0	COG3250^hydrolase family 2	KEGG:mmu:110006`KO:K01195	GO:0005783^cellular_component^endoplasmic reticulum`GO:0005615^cellular_component^extracellular space`GO:0043231^cellular_component^intracellular membrane-bounded organelle`GO:0005764^cellular_component^lysosome`GO:0004566^molecular_function^beta-glucuronidase activity`GO:0030246^molecular_function^carbohydrate binding`GO:0016787^molecular_function^hydrolase activity`GO:0019904^molecular_function…	0	ACATGAGGCAGTGGGCAGTGCGCTTTCTGCTGGGGTTGGCGGCGTGGGCGGCGTGGGCGGCGCCGGCTGTGGGCGGCGGGCTGCTCTTCCCTCGGGACTCCGAGTCCCGCGAGCTGCGCTCCCTGGACGGCGTCTGGAGCTTCCGCCTGGACCCCGGCACGCAGGGTTACGACGACGCCTGGTACTCCGCCGATCTCAGCCAGACGGGCGCCGTGGTGCAGTTGCCGGTGCCGGCCAGCTACAACGACGTG	0
TR35565|c0_g1	1.53502	0.898818	13.9007	0.00254759	0.0145368	F120B_MOUSE^F120B_MOUSE^Q:140-406,H:21-111^39.56%ID^E:2e-11^RecName: Full=Constitutive coactivator of peroxisome proliferator-activated receptor gamma;^Eukaryota; Metazoa; Chordata; Craniata; Vertebrata; Euteleostomi; Mammalia; Eutheria; Euarchontoglires; Glires; Rodentia; Myomorpha; Muroidea; Muridae; Murinae; Mus; Mus	TR35565|c0_g1|m.2485	86-433[+]	F120B_MOUSE^F120B_MOUSE^Q:19-107,H:21-111^39.56%ID^E:9e-12^RecName: Full=Constitutive coactivator of peroxisome proliferator-activated receptor gamma;^Eukaryota; Metazoa; Chordata; Craniata; Vertebrata; Euteleostomi; Mammalia; Eutheria; Euarchontoglires; Glires; Rodentia; Myomorpha; Muroidea; Muridae; Murinae; Mus; Mus	0	0	0	ENOG410ZBE9^family with sequence similarity 120B	KEGG:mmu:67544	GO:0005654^cellular_component^nucleoplasm`GO:0005634^cellular_component^nucleus`GO:0045444^biological_process^fat cell differentiation`GO:0035357^biological_process^peroxisome proliferator activated receptor signaling pathway	0	AAGAAATTGATGGGATGTGTGCAGGATAACCAGCGGAAGCCACATACAACATATTTAGTTTAAGGACGAGAAACGAATCTAAAAGATGAGCTTCAAATCGATTATGCGTTACGCCAGAGCAAATGATTTGTATGAAGATGTGTCTGTGGGGAACATTGCAGAAGAACACAGAAGGAAGACTGGCGAGGATGCGGTGATTGCAGTGGACGGAGTGGGATGCGTGTGGTACCTGTACCGTAACTGCGATTTTCGCTGTGGTGGGCAGTACAAGGAATTCCGGGAGGCGTGCTGGAACTTTGTGGAGAAATTCAGTAAAAATGGCATTAGACTCGTGTTCTTCTTCAATGGACTACCACCTGATGAGAAGAAGGAGAAATGTCCAGACGTGTCAAAAAATAA…	MSFKSIMRYARANDLYEDVSVGNIAEEHRRKTGEDAVIAVDGVGCVWYLYRNCDFRCGGQYKEFREACWNFVEKFSKNGIRLVFFFNGLPPDEKKEKCPDVSKNNVEKIKQNLHVT
TR80231|c0_g1	1.52813	8.52644	8.54731	0.0119055	0.0363779	ALL7_DERPT^ALL7_DERPT^Q:285-797,H:29-194^26.97%ID^E:9e-06^RecName: Full=Mite allergen Der p 7;^Eukaryota; Metazoa; Ecdysozoa; Arthropoda; Chelicerata; Arachnida; Acari; Acariformes; Sarcoptiformes; Astigmata; Psoroptidia; Analgoidea; Pyroglyphidae; Dermatophagoidinae; Dermatophagoides	TR80231|c0_g1|m.14392	186-917[+]	ALL7_DERPT^ALL7_DERPT^Q:25-204,H:21-194^26.2%ID^E:6e-06^RecName: Full=Mite allergen Der p 7;^Eukaryota; Metazoa; Ecdysozoa; Arthropoda; Chelicerata; Arachnida; Acari; Acariformes; Sarcoptiformes; Astigmata; Psoroptidia; Analgoidea; Pyroglyphidae; Dermatophagoidinae; Dermatophagoides	PF16984.5^Grp7_allergen^Group 7 allergen^33-220^E:1.4e-30	sigP:1^16^0.851^YES	0	0	0	GO:0005576^cellular_component^extracellular region	0	GACGGCTCTTTGTCCGGGCTGTCACAGGTGGTCAGGGCCGGGGATGCCTTTCTCGACTACTCCGACCTCCACTTCAAGGTCAACATGACCCTCGGCTTCACTGCAGTCGACGACGCTCGACATTCACATAGAGGCTGGCCTTTCCTCAGTACAGTTATCTCCACTCCGGTCAACGCAGTAGCAAGATGCGAGCCCTGCTGTTGGTAACACTGCTAGTCGCAGGGGCCCTTGCCACTGCTCCACAAAAGCCCAGGAGGCACTTCGGCACGCTGAACGCTGCCAACATCAACGACTACATCGACCAAGTGCTGCCCAACATCGCACAGTTTCTGGCGGATCACGGGCTGGACCCCATCGCATTGCCGGATGACGTCCAGAGCTTCTCAGAGGAAGGCCCGC…	MRALLLVTLLVAGALATAPQKPRRHFGTLNAANINDYIDQVLPNIAQFLADHGLDPIALPDDVQSFSEEGPLGTVWHGEVGLFDGSLSGLSQVVRAGDAFLDYSDLHFKVNMTLGFTAVDLTYGFECQLMDIGPKGTLYGTVHDLAVFAELSLDMSNLTSPAVALNDLYFSNAGTLDIHIEGIGLDLLDNILADIVTGLFHGVILDAIEDKAREVIENALDGLSMKTLLPFVSRLIINHRSHL*
TR31766|c0_g1	1.52788	1.06122	11.2986	0.00513663	0.0214755	UDB18_MACFA^UDB18_MACFA^Q:24-389,H:189-309^31.71%ID^E:4e-16^RecName: Full=UDP-glucuronosyltransferase 2B18;^Eukaryota; Metazoa; Chordata; Craniata; Vertebrata; Euteleostomi; Mammalia; Eutheria; Euarchontoglires; Primates; Haplorrhini; Catarrhini; Cercopithecidae; Cercopithecinae; Macaca	TR31766|c0_g1|m.1968	3-389[+]	UDB18_MACFA^UDB18_MACFA^Q:8-129,H:189-309^31.71%ID^E:3e-16^RecName: Full=UDP-glucuronosyltransferase 2B18;^Eukaryota; Metazoa; Chordata; Craniata; Vertebrata; Euteleostomi; Mammalia; Eutheria; Euarchontoglires; Primates; Haplorrhini; Catarrhini; Cercopithecidae; Cercopithecinae; Macaca	PF00201.18^UDPGT^UDP-glucoronosyl and UDP-glucosyl transferase^8-129^E:1.3e-17	0	0	0	KEGG:mcf:102127013`KO:K00699	GO:0005789^cellular_component^endoplasmic reticulum membrane`GO:0016021^cellular_component^integral component of membrane`GO:0015020^molecular_function^glucuronosyltransferase activity	GO:0016758^molecular_function^transferase activity, transferring hexosyl groups	CAGGAGATGCAGTTGGTGATCCTTATACACCATCATATGTTCCGGATGTTGTGTACACATATACAGACCACATGACTTTCTGGCAGCGTTTAGAAAACACCATGGCTCTATCGTACGCAAGGTACGTTTATAATTATCGCTACTTACCGAAAATTGACGAAATTGTCGAGAAAAATTTCAAAGATCCTACGATGCCTCGGCTGTCAGCGCTGAGAGCCAACACTTCACTGATAATCGTTCAAAGCCACGTGAGCTTCAGTTATCCCCGACCTCACTTACCCAATGTGATTGAGACCGGCGGAATGCACATCCAGCAACCAAAGCCACTACCACAGGACTTAAAGAATGTAATGGACAACGCAAGAGACGGAGTAATATTCTTCAGCATGGG	GDAVGDPYTPSYVPDVVYTYTDHMTFWQRLENTMALSYARYVYNYRYLPKIDEIVEKNFKDPTMPRLSALRANTSLIIVQSHVSFSYPRPHLPNVIETGGMHIQQPKPLPQDLKNVMDNARDGVIFFSM
TR66519|c0_g1	1.52059	4.96944	16.9791	0.00121654	0.0106839	MANBA_CAPHI^MANBA_CAPHI^Q:96-2759,H:15-879^41.29%ID^E:0^RecName: Full=Beta-mannosidase;^Eukaryota; Metazoa; Chordata; Craniata; Vertebrata; Euteleostomi; Mammalia; Eutheria; Laurasiatheria; Cetartiodactyla; Ruminantia; Pecora; Bovidae; Caprinae; Capra	TR66519|c0_g1|m.10874	39-2765[+]	MANBA_CAPHI^MANBA_CAPHI^Q:20-907,H:15-879^41.29%ID^E:0^RecName: Full=Beta-mannosidase;^Eukaryota; Metazoa; Chordata; Craniata; Vertebrata; Euteleostomi; Mammalia; Eutheria; Laurasiatheria; Cetartiodactyla; Ruminantia; Pecora; Bovidae; Caprinae; Capra	PF02837.18^Glyco_hydro_2_N^Glycosyl hydrolases family 2, sugar binding domain^73-151^E:9.1e-10`PF02836.17^Glyco_hydro_2_C^Glycosyl hydrolases family 2, TIM barrel domain^431-573^E:6e-05`PF17753.1^Ig_mannosidase^Ig-fold domain^839-904^E:3.3e-17	sigP:1^24^0.757^YES	0	0	KEGG:chx:100750234`KO:K01192	GO:0005764^cellular_component^lysosome`GO:0004567^molecular_function^beta-mannosidase activity`GO:0005975^biological_process^carbohydrate metabolic process`GO:0006516^biological_process^glycoprotein catabolic process	GO:0004553^molecular_function^hydrolase activity, hydrolyzing O-glycosyl compounds`GO:0005975^biological_process^carbohydrate metabolic process	ATCGCAGTGAGGGGCGGGCAGCCATGGTGAAGCTCGCCATGACCACGACCATGAAGACGCTGACGTTGGCGCTGCTGGCCGCCGCGACCCTTATGGGCCGAGCTGAGGGCCTCATAAGACTTTCTCTGGACGGCGACTCCTGGACGGCCTCCAATGGCAACGGTTCCATCACAGTTCCTGCAAGTGTTCCTGGCGGCATATATTCAGACCTCAGAGCTGCTGGAGTCTTACCTGAAGATATCTATTATCGCTTCAATGATGCTGAGTATCGCTGGGTGTCTTATGAAAATTGGACATACTCGACAACATTTCAAGTCAGTTCTGACATCAAGAATAAAAGGAACATTACTCTACTTTTTAATGGAGTGGACACAATTGCTGACATATATCTGAATAAAA…	MTTTMKTLTLALLAAATLMGRAEGLIRLSLDGDSWTASNGNGSITVPASVPGGIYSDLRAAGVLPEDIYYRFNDAEYRWVSYENWTYSTTFQVSSDIKNKRNITLLFNGVDTIADIYLNKNYIGSTENMFLRYFFSVEDYVQEGENILEVRFQSAVISALERFTAEDYIVPPECVPDEYHGECHVNFLRKMQSSFSWDWGPAFPSVSIWKNVELLAANNGYIKNYYVSVLFNETSQMYEVTQHVEISPHDTMCDLLTLGISTLPGGNNRNQAKTMKITSDQLVDPQFEATWYYSEDEVLNWWPNSMGKQYQYRTYAECMDEDGLYTIEKYIGYRRINIVQVPVAEDADKGLTFYLEVNGVPVFAKGSNWIPSHVLAEMSADPNRIRNLLTAAKNANMNM…
TR96137|c0_g1	1.51918	0.807309	15.9147	0.0015556	0.0116445	ELMD2_HUMAN^ELMD2_HUMAN^Q:1052-681,H:170-293^41.13%ID^E:2e-44^RecName: Full=ELMO domain-containing protein 2;^Eukaryota; Metazoa; Chordata; Craniata; Vertebrata; Euteleostomi; Mammalia; Eutheria; Euarchontoglires; Primates; Haplorrhini; Catarrhini; Hominidae; Homo`ELMD2_HUMAN^ELMD2_HUMAN^Q:1537-1103,H:1-132^36.3%ID^E:2e-44^RecName: Full=ELMO domain-containing protein 2;^Eukaryota; Metazoa; Chorda…	TR96137|c0_g1|m.18797	1088-1537[-]	ELMD1_MOUSE^ELMD1_MOUSE^Q:5-145,H:13-139^36.88%ID^E:2e-20^RecName: Full=ELMO domain-containing protein 1;^Eukaryota; Metazoa; Chordata; Craniata; Vertebrata; Euteleostomi; Mammalia; Eutheria; Euarchontoglires; Glires; Rodentia; Myomorpha; Muroidea; Muridae; Murinae; Mus; Mus	0	0	0	ENOG410XRXC^ELMO CED-12 domain containing	KEGG:mmu:270162	GO:0005829^cellular_component^cytosol`GO:0005654^cellular_component^nucleoplasm`GO:0005096^molecular_function^GTPase activator activity	0	CTGATATACTTTGCCCGGGGTACTCCTGGGCAAAGTATAAGCATCTCTTTTCTGTTTATTGAACACAGAAATATTCCATTCATTTATTATTTCCATCCTGAATGCATGTATTCTATTTTTCAAAGTCATGCACAGGCAATATTTTCTAGTATCCACAGCCACAAATAAGCATCTCTTTTCTGTTTATTGAACACAGAAATATTCCATTCATTTATTATTTCCATCCTGAATGCATGTATTCTATTTTTCAAAGTCATGCACAGGCAATATTTTTCTAGTATCCACAGCCACAAAAAAATATCACATAATAAATATAACACACACAAGTTAGCTCTGACCACACTGTCAGAGGTCTTTGCAATCTTAAATACTAAGAGGAAATAATTCTCATAGATTCTA…	MFRSMWTYIYWLLRPAVKWILRKTTKLCELQRICYGEKPGAPRAHGVEFSLRYSRNQSIRKLLDVLDRQCDSKLFITERKSLVPFAVNTVASAKEINLHIHRQFIKSFSTCIEQIWGYRELIHHVESLRKTWYDASNLEHERKLLYKHN*
TR52716|c0_g2	1.51862	0.812008	11.4202	0.00496187	0.0210415	0	0	0	0	0	0	0	0	0	0	0	TCTCCAAACTTTTTAGTCCGCGGGCCACATTGACTCCTCCACGAAGTCATAAGGGCCTAGATCTACCTAGTGGGATTAAAGCACCCTAGCACTCCATGATCACCGTAATGTAAGGCTAAAGGAAAGACGAAATCTCAAAAATCTAAGGATGTTGGAATAGCTAGCACTGAAACGAACTACGATTTTTATTTAAGTACATAATTTTGATTGGTGGACGTACGTGGCCGAAATTCTGGCGTATTTTATTCTGGCGAATTTCACCGACAAAAAAGTATGTCACTGCACATTCTTCACGAAAGCGTCCTTCAAAGTTGACAAAACCTCAAAATCATTGTTAGCAACACTATTACTGCAAGACGTAAC	0
TR55943|c3_g1	1.51616	7.41005	7.21329	0.0187539	0.0498329	TRY1_ANOGA^TRY1_ANOGA^Q:337-975,H:54-274^40.72%ID^E:1e-37^RecName: Full=Trypsin-1;^Eukaryota; Metazoa; Ecdysozoa; Arthropoda; Hexapoda; Insecta; Pterygota; Neoptera; Holometabola; Diptera; Nematocera; Culicoidea; Culicidae; Anophelinae; Anopheles`TRY1_ANOGA^TRY1_ANOGA^Q:1018-1152,H:204-248^64.44%ID^E:1e-10^RecName: Full=Trypsin-1;^Eukaryota; Metazoa; Ecdysozoa; Arthropoda; Hexapoda; Insecta; Pter…	TR55943|c3_g1|m.8233	1-978[+]	TRY1_ANOGA^TRY1_ANOGA^Q:93-325,H:29-274^43.09%ID^E:8e-57^RecName: Full=Trypsin-1;^Eukaryota; Metazoa; Ecdysozoa; Arthropoda; Hexapoda; Insecta; Pterygota; Neoptera; Holometabola; Diptera; Nematocera; Culicoidea; Culicidae; Anophelinae; Anopheles	PF00089.26^Trypsin^Trypsin^107-319^E:1.1e-56	0	0	COG5640^protease	KEGG:aga:AgaP_AGAP008296`KO:K01312	GO:0005576^cellular_component^extracellular region`GO:0004252^molecular_function^serine-type endopeptidase activity`GO:0008236^molecular_function^serine-type peptidase activity`GO:0007586^biological_process^digestion	GO:0004252^molecular_function^serine-type endopeptidase activity`GO:0006508^biological_process^proteolysis	AGAGTACATGGGGACTCCCGGAGAGAGCGTGATCACTCCCGGAGAGATGTTTCGTACAGCGCTTGTTGTGCTCCTGGTGGTGGCCCTCAGTGGCGCCAGTCCCCTGGTGAAACCCATCCAGGGGAGCAAGCCCTGGAGGTCACGTCTGGACGGCAGGATTGTCGGGGGTTCCGCTGTCAGCATCTCCCAGTACCCGTGCTGGGAGGCTCTCCTGCAGAGATGTCGCCGACTGGTTTAGCTGTGCTCCTGGTGGTGGCCCTCTGTGGCGCCACCCCCGTGGTGAGACCTATCCCAGGGAGGCCACGTGTGGGTGGCCGTATTGTCGGCGGCTCCGCAGTCAGCATCTCCCAGTACCCGTGGCAGCTCTACTTCACCATTGGCAACTACATGTGCGGCGCC…	RVHGDSRRERDHSRRDVSYSACCAPGGGPQWRQSPGETHPGEQALEVTSGRQDCRGFRCQHLPVPVLGGSPAEMSPTGLAVLLVVALCGATPVVRPIPGRPRVGGRIVGGSAVSISQYPWQLYFTIGNYMCGASIISSTWALSAAHCVDGFSTSQMLLRAGTSTRGSGGTTHRIATGYIHGSYSGNDYDICVVQVSNAFSFNSNVQAVGLASSEPSAGTSVTVTGWGTTSYQGSASNTLLGVTVQIIDRNTCNAAYGSITSRMICAGVTGGGKDACQGDSGGPLVSGSTQVGIVSFGAGCGLADYPGVYANVANLRSWIQSATGV*
TR91389|c0_g2	1.50737	-0.0246165	15.6924	0.0016396	0.0119264	GST1C_ANOGA^GST1C_ANOGA^Q:2-241,H:62-143^45.12%ID^E:7e-15^RecName: Full=Glutathione S-transferase 1, isoform C;^Eukaryota; Metazoa; Ecdysozoa; Arthropoda; Hexapoda; Insecta; Pterygota; Neoptera; Holometabola; Diptera; Nematocera; Culicoidea; Culicidae; Anophelinae; Anopheles	0	0	0	0	0	0	0	0	GO:0005737^cellular_component^cytoplasm`GO:0018833^molecular_function^DDT-dehydrochlorinase activity`GO:0004364^molecular_function^glutathione transferase activity`GO:0006749^biological_process^glutathione metabolic process	0	TCTTGCTGAAAGCCGTGCTATTGCCATGTACCTCATCTCAAAGTACGCGAAGGATGACTCTCTCTACCCGAAGGATGTAAACAAACGTGTTCTTGTCGATCAGAGGCTGTTTTTTGATCAAGATTTCTACAACAGAATTTTGAATGTTGCCCGGCCAAAATTTTATGGCGAACAGAGGGATCCCAGCAGCATCGATAAAGTAAACGACGGTCTGGATACTCTAAACAGAATGCTCGATGGCAAAC	0
TR42387|c1_g2	1.50451	6.91772	12.3474	0.00383488	0.0180895	LCTL_HUMAN^LCTL_HUMAN^Q:8-892,H:208-504^44.52%ID^E:2e-73^RecName: Full=Lactase-like protein;^Eukaryota; Metazoa; Chordata; Craniata; Vertebrata; Euteleostomi; Mammalia; Eutheria; Euarchontoglires; Primates; Haplorrhini; Catarrhini; Hominidae; Homo	TR42387|c1_g2|m.4336	2-910[+]	LCTL_HUMAN^LCTL_HUMAN^Q:3-297,H:208-504^44.52%ID^E:6e-74^RecName: Full=Lactase-like protein;^Eukaryota; Metazoa; Chordata; Craniata; Vertebrata; Euteleostomi; Mammalia; Eutheria; Euarchontoglires; Primates; Haplorrhini; Catarrhini; Hominidae; Homo	PF00232.18^Glyco_hydro_1^Glycosyl hydrolase family 1^17-295^E:2e-66	0	0	COG2723^beta-glucosidase	KEGG:hsa:197021	GO:0005903^cellular_component^brush border`GO:0005783^cellular_component^endoplasmic reticulum`GO:0005789^cellular_component^endoplasmic reticulum membrane`GO:0016021^cellular_component^integral component of membrane`GO:0008422^molecular_function^beta-glucosidase activity`GO:0005975^biological_process^carbohydrate metabolic process`GO:0002089^biological_process^lens morphogenesis in camera-type e…	GO:0004553^molecular_function^hydrolase activity, hydrolyzing O-glycosyl compounds`GO:0005975^biological_process^carbohydrate metabolic process	GTTCGTGAGTGGCTACGCCAGCCAGGGAGGGCAGGCCCCCAGCCTACCTGCTCCAGGTATCGGCGATTACCTGTCGGCCCACACGGTCATCAAGGCGCATGCGCGCGTCTACCACCTGTACCAAGAGCAATACAAGGCCACGCAGCAAGGTTACGTGGGCATCACGCTGAACAGCGACTGGAACGAACCAGCCAGCAACTCAACCGAAGACATCGAAGCAGCCGAACGCGCCCGCCAGTTCCAGATTGGACTCTACGCTCACCCCATCTTCACGGAGGAGGGCGACTACCCTCCAGTGATGCGGCAGAGGGTGGACGCCAACAGCGCCGCAGAGGGGAGGCCACGCTCCAGGCTGCCTTCTTTCACCAGTGACGAAGTCGCCTACATCAAGGGAACATC…	FVSGYASQGGQAPSLPAPGIGDYLSAHTVIKAHARVYHLYQEQYKATQQGYVGITLNSDWNEPASNSTEDIEAAERARQFQIGLYAHPIFTEEGDYPPVMRQRVDANSAAEGRPRSRLPSFTSDEVAYIKGTSDFFGINHYTSVLTASGDAGTIPSKDHDAGVINYGDDSYPHGASGWLRVIPWGFRKLLNWIAVSYPEYPIFVTENGYSDWGELDDKNRTNYYTSYLAEMLKAINVDGNNVIGYTAWSLLDNLEWNDGYAIKFGLYQVDFNDTERPRTAKDSVQTLAQIYANKELPMEYFQ*
TR5199|c0_g1	1.49702	3.79948	20.5989	0.000562702	0.00831417	0	0	0	0	0	0	0	0	0	0	0	GCGGTGTGCTCACCACATAACCCTCCGTACCGCAACAGTATGACGCCGCAAGGCAGAGGATGATATGGCAGCCGGTAGAAATCCCTAGGGCCCTCACAACATTGTGAGGAGCTCGTTAAAACTGCGTAAAGTACTTAAATTTCCTTCGCTTCAGCACCCCATACAGAGCAGTATATAAAGTTCTTAGCACTTTACGTTTCTAATACTTTAATTTAATTTCGTTGCCCGTAATTCAAAAGTAAGCATTTAGACGAAGTCCCCATCAGTGATATTAACGTTTTGGACTCATTCTTACACAATTACATATTTTCGTTCTACTTTATGCCATCAGCTACCGCGATGAGCAACTGGTGG	0
TR8092|c0_g1	1.49689	1.38991	13.4537	0.002858	0.0154565	0	0	0	0	0	0	0	0	0	0	0	TTTTTTTAGTGAACTATAAATCAAGATATTGTGTATAGTTACAAAACAGCTGCACCTTTGTAAACAGCCACTGCATATCCTCTTACATTGTTAACTTCTGCTTGATCTCTTGTTTCATACTAAACAAAATGTTATTTTTCGAATACAATACAAGCTCCATGCATACTAGAAAAATGAGAACTTTTTTAATGTGGACATTTGCATTAAACTACTTTTACATTCCACAGTCAAACTTTTCTGTAAAAATCTAAAGAAGAAGTACAGACTGTTTTTGCAACATATTTTAGCAGA	0
TR55774|c1_g1	1.49375	1.32265	35.6802	4.72981e-05	0.00694482	MDR49_DROME^MDR49_DROME^Q:260-3,H:463-548^74.42%ID^E:7e-38^RecName: Full=Multidrug resistance protein homolog 49;^Eukaryota; Metazoa; Ecdysozoa; Arthropoda; Hexapoda; Insecta; Pterygota; Neoptera; Holometabola; Diptera; Brachycera; Muscomorpha; Ephydroidea; Drosophilidae; Drosophila; Sophophora`MDR49_DROME^MDR49_DROME^Q:260-3,H:1120-1207^59.55%ID^E:1e-23^RecName: Full=Multidrug resistance protein…	0	0	0	0	0	0	COG1132^(ABC) transporter	KEGG:dme:Dmel_CG3879`KO:K05658	GO:0043190^cellular_component^ATP-binding cassette (ABC) transporter complex`GO:0016021^cellular_component^integral component of membrane`GO:0005887^cellular_component^integral component of plasma membrane`GO:0005886^cellular_component^plasma membrane`GO:0005524^molecular_function^ATP binding`GO:0016887^molecular_function^ATPase activity`GO:0042626^molecular_function^ATPase-coupled transmembrane …	0	ATGCGCTGCTTCTGGCCTCCCGACAGCTGGGCCCCGCGCTCGCCCACCAGCGTGTCGTAGCCCTGCGGGAGCTTGGAAATGAAGTCATGTGCGTTGGCCATTTTGGCTGCCTCTATTATTTCCTCCATGGTTGAACCGTCTCGTCCGTAGCGTATGTTCTCTGCAATGGTGGTCTGGAAGAGTACCGGCTCCTGTCCCACCACGCCAATCTGCGACCGTAGCCAGCCAACATTCAGCTTCCGGATATCGTGGCCATCAAG	0
TR80399|c0_g2	1.49243	3.6621	18.5517	0.000860248	0.00943486	TM53A_XENLA^TM53A_XENLA^Q:1206-514,H:24-265^26.48%ID^E:5e-07^RecName: Full=Transmembrane protein 53-A;^Eukaryota; Metazoa; Chordata; Craniata; Vertebrata; Euteleostomi; Amphibia; Batrachia; Anura; Pipoidea; Pipidae; Xenopodinae; Xenopus; Xenopus	TR80399|c0_g2|m.14477	463-1443[-]	TM53A_XENLA^TM53A_XENLA^Q:80-310,H:24-265^26.48%ID^E:2e-07^RecName: Full=Transmembrane protein 53-A;^Eukaryota; Metazoa; Chordata; Craniata; Vertebrata; Euteleostomi; Amphibia; Batrachia; Anura; Pipoidea; Pipidae; Xenopodinae; Xenopus; Xenopus	PF05705.14^DUF829^Eukaryotic protein of unknown function (DUF829)^84-310^E:9.5e-50	sigP:1^17^0.465^YES	0	0	KEGG:xla:496092	GO:0016021^cellular_component^integral component of membrane	0	AAATAAAACATTTGATTTACAATGTTTAAAGGCTAGGTTCATTTCTATTTGTGAGGAAATCCAAGCACAACAAAACATTGCCATCTGCAGATACACAGTGTGCTCACAACTGGCAAATCATGGCATTTAGTATGTGAAAGCAGGTTGATAAACAGTCAGAATGACACTTACTCTTTTTAAACAAAATAAAGGTAACAAAACAGTTGACATTTATTCACATTACAAATATGAATAAGTGATATAAATTAAAGAAACATTTAAACTATTATTGAAAAATGTTTATCATATCACAAAATTATTAAAAATGAAAGTTTTTAAAACTTTGTCAGTAAGTATTAGCCTCACATCAAGTGATGATAAAAGCTAAACTGTAGTCTTTTCTTTTTTTCACTCAAATAG…	MRLYRTALTVILKGTSAAGTTCVIDNNHANKFLLSAPNSALLLSFQRSYTTNELSKNLQLTSNDEVKIDKSFGFKIVSKPTNKPLVVLLPWLLAQQKHIMKYGRFYLDQGFDVLKVSLTPWQLLWPTKGSQLIAEDLLQFLHLNKFYQPLLLHGFSVGGYLWGEALVKIKQDMELYQPVVDRIAGHIWDSAADLTEMPVGFPKAVFPKNLVLQNAFEKYIRYHLKTFHQAATIHYIRSSQMFHTSIVRAPALLLFSKTDPIGCAESNLRVRDTWESVGMRVYTKCWDESPHVGHFRAHPQEYMAEIYAFLDKLNLVQNPERQKVQI*
TR60782|c7_g14	1.49127	0.472522	17.6752	0.00104109	0.0100502	0	0	0	0	0	0	0	0	0	0	0	TACATCTACATCTACATCTACATGACTACTCTGCAATTCACATTTAAGTGCTTGGCAGAGGGTTCATCGAACCACAATCATACTATCTCTCTACCATTCCACTCCCTAACAGCGCGCGGGAAAAACAAACACCTAAACCTTTCTGTTCGAGCTCTGATTTCTCGTATTTTATTTTGATGATCATTCCTACCTATGTAGGTTGGGCTCAACAAAATATTTTCGCATTCGGAAGAGAAAGTTGGTGATTGAAATTTCGTAAATAGCTCTCGCCGCAAAGAAAACTGCCTTTGTTTCAGTGACTGCCACCCCAACTCGCGTATCATAGCAGTGACTTCAGCTCACATATCGTCTCAC	0
TR59482|c0_g1	1.49019	0.676216	37.8469	3.5443e-05	0.00694482	0	0	0	0	0	0	0	0	0	0	0	GTTACATAAAAACATTTCATAACAAAAAATAGTAAATTATTAAAATTTTGTAATGCTTTTGTTACTTTCAGGTAAGAGTGTGGAAGAGGCTTTGTAAAACTTGTTTTTGCAGTTTGTAAGACTGCTCATAAGAAAGGAAGACCAAGCAAGAGAACTGAATTAAAATTGGTGCGAGAAGCAATGACAGAATGTAAGACAGATTCAGAAGTGTGATTCGGTTTCTGGGTGAAACGATATCATTGATAAGATTAGCTAATGATATTGGTGTACTCAGTGAAAGTCAAG	0
TR55865|c1_g1	1.48926	5.47291	10.3142	0.00684817	0.0253827	LIP3_DROME^LIP3_DROME^Q:166-1359,H:27-393^42.86%ID^E:3e-106^RecName: Full=Lipase 3;^Eukaryota; Metazoa; Ecdysozoa; Arthropoda; Hexapoda; Insecta; Pterygota; Neoptera; Holometabola; Diptera; Brachycera; Muscomorpha; Ephydroidea; Drosophilidae; Drosophila; Sophophora	TR55865|c1_g1|m.8103	1-1365[+]	LIP3_DROME^LIP3_DROME^Q:56-453,H:27-393^42.86%ID^E:1e-109^RecName: Full=Lipase 3;^Eukaryota; Metazoa; Ecdysozoa; Arthropoda; Hexapoda; Insecta; Pterygota; Neoptera; Holometabola; Diptera; Brachycera; Muscomorpha; Ephydroidea; Drosophilidae; Drosophila; Sophophora	PF04083.16^Abhydro_lipase^Partial alpha/beta-hydrolase lipase region^58-116^E:5.4e-21`PF00561.20^Abhydrolase_1^alpha/beta hydrolase fold^99-226^E:5.7e-15	sigP:1^30^0.607^YES	0	COG0596^Alpha beta hydrolase	KEGG:dme:Dmel_CG8823`KO:K01052	GO:0016298^molecular_function^lipase activity`GO:0044255^biological_process^cellular lipid metabolic process`GO:0016042^biological_process^lipid catabolic process	GO:0006629^biological_process^lipid metabolic process	GGAGATCAAGAGCGGTCACTTCCGACGGGATCAGAGACCATGAAGTCTGCCGCTTTACTGGTGCTGGTCCTCGTGATAGCTGCGGAAGGGGCAGTCCCTTACCGGGCGGTCCCTTACCGTCGACCCCTTGTGGAGACGCTCGAATACAATGAGGATGCTGACTTGGATACGCCCGAGCTGATCCGGAAGTACGGCTACCCAGTGGAGGAGCATTTCGTGACGACGGCTGACGGCTACATTCTGCGCATGTACCGGATCCCCTCCAGCCCCAAGGCGAAGGACCCGTCCGGCTACCCCATCCTGCTCGTGCACGGCCTGGAGTCCAGCGCCGCAGACTGGGTGGTCATGGGGCCCGACAAGGCTTTTGCATACATTCTGGCAGACGCTGGCTTCGACGTA…	GDQERSLPTGSETMKSAALLVLVLVIAAEGAVPYRAVPYRRPLVETLEYNEDADLDTPELIRKYGYPVEEHFVTTADGYILRMYRIPSSPKAKDPSGYPILLVHGLESSAADWVVMGPDKAFAYILADAGFDVWLGNARGNKYSRNHTSINPDSSEFWQFSWHEIGYYDLPAKIDYILAKTGQADLYYAGHSQGTTSFYVMTTMRPEYNGKVRVMFSLAPVAFMDHMFNPLLQIVSQFIDQVEVLLQMIGMNEFNPNSEFMQLVGELMCSDESFTQDICAAFTQDICANIMFMIGGFNEAELNKTMLPVILAHAPAGAGSRQFIHYGQEIKSGHFRQYDHGAGSRQFIHYGQEIKSGHFRQYDHGMFGNLEKYGSFWPPDYDLSKITAKVALFYSSNDW…
TR56550|c0_g5	1.48753	11.1673	13.6821	0.00269419	0.0149926	G12_ANOGA^G12_ANOGA^Q:882-1172,H:80-194^33.04%ID^E:5e-12^RecName: Full=Protein G12;^Eukaryota; Metazoa; Ecdysozoa; Arthropoda; Hexapoda; Insecta; Pterygota; Neoptera; Holometabola; Diptera; Nematocera; Culicoidea; Culicidae; Anophelinae; Anopheles	0	0	0	0	0	0	ENOG410Y27Q^protein G12 precursor	KEGG:aga:AgaP_AGAP006187	0	0	GAGTACATGGGGCACATAGCTGGAAGCAAAGCAGCGAGACGTGCTCGAGATGAAGACGATCTTCATCCTCTTCGCTGTCCTCGGGATAACAGCAGCAAAGGCTGTTCCTGCCCCCGGTATTAGCGTACACACACGCGACCTCCAGGATGACCTCAATGAGGCATCGACGTCGACGCATTCATTGACCTGATTCGCGGTCTTTTCGGCCTGCCAACAAGTATGTAACACACTATGTAGCATAAGTAATGAAACCATTAGTATCTAACAGGCATTCTTCCAAAGATTGTCGTATTTCAGAGACAAGCACAAAATTTCGCTTCTATAGTACTTAGTCTCTCTTCATTCTCTCTTAGGCTCCAGCAAAAAGGTTCGACTCCTGTACGACAGGATCAGGTCTCC…	0
TR87683|c0_g1	1.48534	1.38123	8.63772	0.0115586	0.0356551	GST1D_ANOGA^GST1D_ANOGA^Q:96-725,H:1-209^41.9%ID^E:1e-48^RecName: Full=Glutathione S-transferase 1, isoform D;^Eukaryota; Metazoa; Ecdysozoa; Arthropoda; Hexapoda; Insecta; Pterygota; Neoptera; Holometabola; Diptera; Nematocera; Culicoidea; Culicidae; Anophelinae; Anopheles	TR87683|c0_g1|m.16406	90-758[+]	GST1D_ANOGA^GST1D_ANOGA^Q:3-212,H:1-209^41.9%ID^E:4e-58^RecName: Full=Glutathione S-transferase 1, isoform D;^Eukaryota; Metazoa; Ecdysozoa; Arthropoda; Hexapoda; Insecta; Pterygota; Neoptera; Holometabola; Diptera; Nematocera; Culicoidea; Culicidae; Anophelinae; Anopheles	PF02798.20^GST_N^Glutathione S-transferase, N-terminal domain^1-75^E:2.3e-11`PF13417.6^GST_N_3^Glutathione S-transferase, N-terminal domain^5-79^E:7.3e-14`PF13409.6^GST_N_2^Glutathione S-transferase, N-terminal domain^11-75^E:1.6e-07`PF00043.25^GST_C^Glutathione S-transferase, C-terminal domain^122-191^E:2.6e-08`PF14497.6^GST_C_3^Glutathione S-transferase, C-terminal domain^130-189^E:1.6e-05	0	0	0	0	GO:0005737^cellular_component^cytoplasm`GO:0018833^molecular_function^DDT-dehydrochlorinase activity`GO:0004364^molecular_function^glutathione transferase activity`GO:0006749^biological_process^glutathione metabolic process	GO:0005515^molecular_function^protein binding	GCCAAATCGGTGGGAGGCAGACGTGCTGTGTGCATCAAGGAGCTCACCTCGTTACTGCTGAAGTCTCGCTTCTCTTACTGTACGCAGGCATGCCTATTACGCTGTACTATTATCCAGCAAGTCCGGGTCCGAGACTGGTCCTGGCCACAGCTAAAGCAATCGGCCTAGATGTCGACATCAGACTTGTTGATCTGCTCGCGAAGGAGCACCTAAAGGAGGAATATCTCAAGATTAATCCAGAACATACGATACCAACTTTAGACGACGACGGCTTTATTATATGGGACAGCCATGCGATCGCCACGTACCTCGTGTCGCAGTACGGAAAAGACGACTCTCTGTATCCGAAGGACCCAAAGAAGAGGGCGCGAGTTGATCAACGGTTGTATTTCGAAGCTA…	MPITLYYYPASPGPRLVLATAKAIGLDVDIRLVDLLAKEHLKEEYLKINPEHTIPTLDDDGFIIWDSHAIATYLVSQYGKDDSLYPKDPKKRARVDQRLYFEATTLFPRLKAITFPLLFLGKKEVEPDTKTALYDALGLLEKYLEPTGWVAGDGATIADIACAATASNLLESGVDFTAFPRTRSWLERCNRDIPGFEEANAEGAKLGGQVISSRLPPNALAL*
TR46797|c0_g2	1.48428	0.942856	9.2351	0.0095415	0.0315001	0	0	0	0	0	0	0	0	0	0	0	GTGCATTAGAGCCTGATGTAGGGACTTCGCATTTTTATGTCTAGTGTTGTGCATTGCTGATATTTATTAACTTACGTAGTTCTGTTTTCTCACATACTCTTATAAACAAGCTTATATTTTCAAATATTACGGATAACGCCCTACGCCATACAAAAGACGGTTGCGAAATGTGATATATGTGTCTACAGCTCAGACAAATACTGCATGTGCACGATATTCAATTAGGTTTCATTTAACAGCAGCGCAGGAATGAATGCAAAACACTGTTGACCGACGTTCACTGGACCGTAGTATAGACAATGAAGATCATATAAAACCTGAGGAGAACAGAGTTGAGAAATGACTGACACAATCTTGTTTCGAAGGTTTTACGCTATCCAGGATTGTTGTAGTGGTATG…	0
TR56550|c0_g4	1.48315	7.10995	14.5373	0.00217057	0.0135431	0	0	0	0	0	0	0	0	0	0	0	CAACGACCCTGAGGTGCAGGCTGCTGTTCAGTACATACTCTCTGATGACTTCAAGAGCATTGTCCTGGCCATCGACGCTCTCCCAGAATACATTGATGTAAGGATCTCAACCTGTACCAGTTGCAGACCGACGCATTATTCTTTTATTGTGGATACGTTAAATTGTTACCTTCTTCTCCACAGTTCCTCAACTACCTGCAAGAGTCCGGCCTCGATGTCTACAAATACGTGAACGCTCTACACGACTTCCTGGGCACCTATACTAGTTGCAGACCGACGCAATATACTTTTATTGTGGATTTGTTAAATTGTTACCTTCTTCTCCACAGTTCCTCAACTACCTGCAAGAGTCCGGCCTCGATGTCTACAAATACGTGAACGCTCTACACGACTTCCTGG…	0
TR89919|c0_g1	1.48046	1.12941	19.3298	0.000729627	0.00902957	0	0	0	0	0	0	0	0	0	0	0	TTTTTTTTTTTTTTTTGCGCAAAGGTATCTTAACTGAAATATTAAGAATTTACACAAAATGTTGGTTCGGGAAAATTATGCATTTTTATGGATTTGGTAAAGCAATAAATGTTTTTGAAGCTTGTAAGAAACTTATTAAATGGTACAAATTATAGGTCTCAAAGTCGAACAGTTCAAGGTATAAAACATGACAAATTGCACAGTTTTTGAAACTTTAAAAATTAGTAGCTCGGAACTGAAGGACCAGAAAAGTTTTATTTGGGATTTTTAATACAAACAAGTACCATATTATCTTTGTACAAGAAATTAACAAAATCTTGTGATTCCACAAAACAGGCTGTTGATGCTAATCTTTGTGTAACATCCTGTACAACTGTTACATCTCTTCCATCACACAAC…	0
TR39021|c0_g1	1.47796	4.16866	18.0712	0.000954435	0.00979146	0	TR39021|c0_g1|m.3336	888-1547[+]	0	0	sigP:1^28^0.528^YES	0	0	0	0	0	CTCACGGCGTGCTTGGCTGGCGGGGACCACGTAAAGTGCTAAGCCACACCGTAAAATTCACCGCCGGGGTCATTCAAAGAAGTCCGCGAGACGTGTAGGTGTTCGTCGTGGAAGATCTGTGAAGCTGACTTCAGCAGTAGTGCAGTAGCCCGAAGAAGAGAGACAGTTGTCGGAGAGAGCTTCAGCCTGCTCTACTGCAGAAAACCAGAGTTGCTACGTTTGGTGTTGATTCTGTTTACCGACAGCGTCGAAGAAGACTTTTGAAGCTTAGATCTGTACGTTACTGCTCTGGTTGAACTGCGATAGCCATCAGTCTGCGCGTTAGTTCGGTGACAACCTTGCGGCTGTGGAATAGGAGAACGAGTCTCCTCAAGGCAGTAGACCCACGGGCAGCTCTCA…	MVEKAGSCERWLLVVMVGALLSARSCNLLPDNLNLDDDPSDDGDGSFWSQRSYGGYVDDFLVKLRHAVVDDGLDPLEPPDEVQDIDERSGLSTWHADVRLEPRDMRALRKDSAAFDACQKHVQEQEGDQDLGDVLLSYMFLGRVLRVAPSGDIFGQQEELRTSIERWVETLPLLVDTSPWSKSHTSRFIHIRNRVLTRHIPLTAFWSRSDHQRRHFWKR*
TR16343|c0_g1	1.47414	1.52353	31.7097	8.32132e-05	0.00694482	PGP1_CAEEL^PGP1_CAEEL^Q:298-83,H:603-675^56.16%ID^E:2e-09^RecName: Full=Multidrug resistance protein pgp-1;^Eukaryota; Metazoa; Ecdysozoa; Nematoda; Chromadorea; Rhabditida; Rhabditina; Rhabditomorpha; Rhabditoidea; Rhabditidae; Peloderinae; Caenorhabditis	TR16343|c0_g1|m.1705	2-304[-]	PGP1_CAEEL^PGP1_CAEEL^Q:3-61,H:603-662^63.33%ID^E:2e-15^RecName: Full=Multidrug resistance protein pgp-1;^Eukaryota; Metazoa; Ecdysozoa; Nematoda; Chromadorea; Rhabditida; Rhabditina; Rhabditomorpha; Rhabditoidea; Rhabditidae; Peloderinae; Caenorhabditis`PGP1_CAEEL^PGP1_CAEEL^Q:3-58,H:1266-1321^46.43%ID^E:2e-11^RecName: Full=Multidrug resistance protein pgp-1;^Eukaryota; Metazoa; Ecdysozoa; Nemat…	0	0	0	COG1132^(ABC) transporter	KEGG:cel:CELE_K08E7.9`KO:K05658	GO:0016324^cellular_component^apical plasma membrane`GO:0016021^cellular_component^integral component of membrane`GO:0005886^cellular_component^plasma membrane`GO:0005524^molecular_function^ATP binding`GO:0016887^molecular_function^ATPase activity`GO:0042626^molecular_function^ATPase-coupled transmembrane transporter activity`GO:0008559^molecular_function^ATPase-coupled xenobiotic transmembrane t…	0	CGGGGTTCATCTCCTGCTCCTCCGCCTCCTCCTCTCCCGCAGCCGACGACGCGTCACTGCGCACACTCAGTAGGCGTTCCGGCCTCACGCGGCTCGCGTCTGCAGATTCAGTTGGAGATTTAGAAGTGTCTTCAGAGTCGGTGACCTGTGTGGTGACGAGGTTGTGGTAGTGGCCCTGCAGTGCCATGAGCGCGTCGTGCGGACCCTCCTCGACGACGGAGCCTCCGCTGATCACCACGATCCTGTCAGCGTTGCGGATGGTTGACAGTCGGTGAGCCACGATGATGGTCGTGCGTCCGACGCTGG	SVGRTTIIVAHRLSTIRNADRIVVISGGSVVEEGPHDALMALQGHYHNLVTTQVTDSEDTSKSPTESADASRVRPERLLSVRSDASSAAGEEEAEEQEMNP
TR50126|c0_g1	1.47393	2.41052	26.5268	0.000189168	0.00696612	0	0	0	0	0	0	0	0	0	0	0	GCAAAAGATGGATAACTTTTATTGTTATATACATGATGGATATATTTGAAATAAAAGCTGAGGAAGAATGGAGGCAAATTTTAACAATATTTTGCCATTTGTGTTATTTTTATCCAAAATGTCATGCAAACGGAGACGTGACATTATTTCCGGAGTACCCTTGGCGCAGGCCGCCAAATGGAATCGTGACTACAGAGCATGCGTCTTCTGTCAGTGGAATGGGAAGCAGTCATATGTATTGTAGAAAATAATCTCTATTGCCAGTTCCGTGTTTAGACAGGCTGTCCTGAGACGGCCGCCAGCAAGTGCATAATGATGATGAGTTTCCACGTGTCATCCATCGCCCAGCCGCGGCCCGTACGCCTCAAGTCTGTATCTACCGCCGCCCGAAGCTACTAC…	0
TR64699|c0_g2	1.47209	7.39222	11.1971	0.00528791	0.0217854	GUNB_CELFI^GUNB_CELFI^Q:1389-106,H:37-476^47.57%ID^E:7e-107^RecName: Full=Endoglucanase B;^Bacteria; Actinobacteria; Micrococcales; Cellulomonadaceae; Cellulomonas	TR64699|c0_g2|m.10442	94-1446[-]	GUN4_THEFU^GUN4_THEFU^Q:1-447,H:31-488^47.42%ID^E:4e-115^RecName: Full=Endoglucanase E-4;^Bacteria; Actinobacteria; Streptosporangiales; Nocardiopsaceae; Thermobifida	PF00759.19^Glyco_hydro_9^Glycosyl hydrolase family 9^22-442^E:2.7e-135	sigP:1^19^0.857^YES	0	ENOG410XPC9^hydrolase family	0	GO:0008810^molecular_function^cellulase activity`GO:0030248^molecular_function^cellulose binding`GO:0030245^biological_process^cellulose catabolic process	GO:0004553^molecular_function^hydrolase activity, hydrolyzing O-glycosyl compounds`GO:0005975^biological_process^carbohydrate metabolic process	GGAAGGAGGGAACGTGGGGTGTGAGGAAATGAGAACAGTACGACACGTTTTTAAGCTAGCAGACTTTTATTGTAGGAAGAGCAGACTTGGTTCTCACAGGTTGTACTTGATGAGGGCGGCCAGGAGACCCTGGAAGGGAGCGTTGTAGTCGAGCGCGACCTCGTTCTTCTGGGCGTCCTGGCGGGTGTCCACGTAGTCGTCGTTGGCGCCGGGTCCTCCCACCAGTGCGCCGTTCAGCACGTGCGCGTTCACCTGGGCGCCGTTGAACGTGTTCCAGTCGCACGTGGCCGGCGCGTCGGGGCACGAGCTGGAGCGGTGATGCGGGCTGCGTGGGTAGTTGCTGTCGATGCCGCACACGTAGCTGAAGCCGGTATCTCCCAGGGCGTAGCCCATCTGCTC…	TMARICVFFLLGLLASSQAYDYKDALQKSLLFYQAQRSGKLSGMDSSLYWRGDSALNDRGQNGEDLTGGYYDAGDHVKFGFPMAFAMTTLAWGILDWGDGYTSAGVMDEARNCIRWGMDYLIKAHISDNELYVQVGDGTADHNYWGRPEDMTMDRPSYKITTSAPGSDVAAETAAAFAAASLVFKGVDDNYANTLLSHAKALFNFADSYRGVYSDSVSAAASFYGSNGYADELPWAAVWLYRATASESYLNRAIELYNEGGLQYRSGYGWDEKSSGATVMIARFTSDQTYKTTVQNYCDNLMNNQQRTPKGLIFLGEWGSLRNMAGAMFICMMASDRGINPTAYRNMVKEQMGYALGDTGFSYVCGIDSNYPRSPHHRSSSCPDAPATCDWNTFNGAQV…
TR87243|c0_g1	1.47047	0.312068	24.2317	0.000282285	0.00720487	0	0	0	0	0	0	0	0	0	0	0	AGTGTATTTTATTTCTTTGTGTGTGAGGAATGTTTCCTGAAAGTTTGGTCGTACCTTTTTGTAACACCCTGTATTTTGTTTCGTATTACACTGCCAGTTACCACCATCCATATTCGGCTTCTCAACCTTCGTTGCCGGAGAATGGCCCTTCCCCCTTACGATCATCCCCGGATATTGTGTATCATGATAACGGAATCTCTTTGTGCAATCTAAACAGATCAATGATTGTTTTGTTCACTTATTAGATAGTCTGTACCACAGAGTGTAACTATGAACACTGCCAATCAATGGCGCTAGATTATTTAATATATAGCCAAAAATGTAAACAGGAATTGCAACTGTCAAAGTAAACTTTCTTATAGCGTAATCAGCTGTGTGCAAGAAGTCCAAATGGTTTTC…	0
TR7554|c0_g1	1.46707	1.86967	13.3184	0.00296039	0.0157463	DAF36_CAEEL^DAF36_CAEEL^Q:2-238,H:150-229^38.75%ID^E:2e-14^RecName: Full=Cholesterol 7-desaturase {ECO:0000303|PubMed:21749634};^Eukaryota; Metazoa; Ecdysozoa; Nematoda; Chromadorea; Rhabditida; Rhabditina; Rhabditomorpha; Rhabditoidea; Rhabditidae; Peloderinae; Caenorhabditis	0	0	0	0	0	0	COG4638^rieske 2fe-2S domain-containing protein	KEGG:cel:CELE_C12D8.5`KO:K14938	GO:0005737^cellular_component^cytoplasm`GO:0016021^cellular_component^integral component of membrane`GO:0051537^molecular_function^2 iron, 2 sulfur cluster binding`GO:0046872^molecular_function^metal ion binding`GO:0016491^molecular_function^oxidoreductase activity`GO:0008203^biological_process^cholesterol metabolic process	0	CTTCCGCGGAGCCGACGGCCGCTGCACCTCCGTCCCCTACGCCGACAAGGTTCCAGAGATCGCCAAGGTGCGCCGCTGGGAGAGCTGCGAGGTGAACGGGCTGGTGTTCGTGTGGTACCACGCGGAGGGCGAGCCGCCCAGCTGGCGGCCCGAGCAGCTGCCGCAGCTGGCGGACGGCAGCTGGCGCTACCGCGGCCGCTCAGAGTTCCTCATCAACGCGCACATCGAGGAGATCCCGG	0
TR53155|c0_g2	1.46664	5.36834	16.2908	0.00142462	0.0112994	0	0	0	0	0	0	0	0	0	0	0	GGAAGTCATTGAGGTCATCCTGGAGGTCGCGGTTGGCCTTCTTGGCAGATACATGGAGTCGAACCTTGTTGCTGGAGCCTAAGAGAGAATAAAGAGAGACTTTAAGTACTCTAGAAGCGAAATTGTACAATTGTCTTTGAAATGTAACAATCTTCGAAAGACTGCCTGTTAGATACTAATGCTTTCATTACTTATGCTACATAGTGTGTTACTTACTTGTTGGCAGGCCGAAAAGACCGCGAATCAGGTCAATGAAT	0
TR75072|c0_g1	1.46517	2.27205	7.36599	0.017771	0.0479751	TTPAL_MOUSE^TTPAL_MOUSE^Q:135-938,H:36-301^31.37%ID^E:8e-36^RecName: Full=Alpha-tocopherol transfer protein-like;^Eukaryota; Metazoa; Chordata; Craniata; Vertebrata; Euteleostomi; Mammalia; Eutheria; Euarchontoglires; Glires; Rodentia; Myomorpha; Muroidea; Muridae; Murinae; Mus; Mus	TR75072|c0_g1|m.13290	3-1043[+]	TTPAL_MOUSE^TTPAL_MOUSE^Q:45-312,H:36-301^31.37%ID^E:7e-36^RecName: Full=Alpha-tocopherol transfer protein-like;^Eukaryota; Metazoa; Chordata; Craniata; Vertebrata; Euteleostomi; Mammalia; Eutheria; Euarchontoglires; Glires; Rodentia; Myomorpha; Muroidea; Muridae; Murinae; Mus; Mus	PF00650.20^CRAL_TRIO^CRAL/TRIO domain^139-288^E:1.7e-30	0	0	ENOG410XRSQ^Transfer protein	KEGG:mmu:76080	0	0	CTTCGCGCTGCCACCGGACTGAGGCGCCCCTCCAGGACAGCGTCCTCGTCTGCTGCTCCACGCCCGGACGCTCGCGTCTCTGTGCACAAGGACGACAACCCAGACACCCAAAGATGAGTTCCGGTATCCGGCCACTCAGCCCCAAGCTGGAGGTCGTCGCCAAGAAGGAACTGGGCGAGGAGCCGAAGAGGAGAGCCAAGGACATCCAGCACATCAGGGACTGGATGAAGAAGCAGCCGCACCTCAAGGCGCGCACGGATGACCAGTGGATCGTGACGTTTCTGCGAGGCTGCAAGTTTTCCCTGCAGCGCACCAAGGAGAAGCTGGACATGTACTACACCATGAAGACGGCCGCTCCGGAGTTCTACAAGAACCGAGACCCCTTCGATCCTAAAATTC…	SRCHRTEAPLQDSVLVCCSTPGRSRLCAQGRQPRHPKMSSGIRPLSPKLEVVAKKELGEEPKRRAKDIQHIRDWMKKQPHLKARTDDQWIVTFLRGCKFSLQRTKEKLDMYYTMKTAAPEFYKNRDPFDPKIQYMLDVGFISYLPKVDKEGRRITVLRLGRLDPKKVTADYLFRLLFMGGDLSLNEDDSAIVCGATVILDLKDTTLAHAAIFTPSAVKKSMAVYQDAYPFRPKAIHFVNTPSFSEAITGLFLPLMKPKLRKRVVIHSKLETLLKHFSKDMLPDIYGGTAGTFEEVTAPWRKQLESFAEYLKEDEKYGTDESKRTGKPKTRSDLFGVEGSFRQLVVD*
TR96833|c0_g1	1.46513	0.30362	11.451	0.00491873	0.0209432	0	0	0	0	0	0	0	0	0	0	0	ATTACAGTTGCCAGTTGCGGTAGTATTAAGTTTCATTCATTAAATACAATAGCACTTGCAATCACTTTCATTTGTCTCAGAAGTCCGATCATCTTTACGAACTTCAAAACTCATACTGTGAAAGTCAGTATGAACCTGGAGACAGAATTAAACCAAATGAATTGCTTCCAAGCAAACTGTAGGCTGTTGTTATCCTGAAAGCAACAGTAAATAAATGTTTGAGGTTTTTCACTAGCTTAACAATTTTTTAAAAGAATAAGTCAAAGATAACTTTTGGGCCACAGTTGTTACGTTTATCGTTGCCGCAAGTAAAGTAAATAGCACGCAATGGTATTTTACGTGCCAATTGAGATCTGAATTTATCAAGTCCCTGTTAAAAACAGGAAAT	0
TR73393|c0_g2	1.46489	1.51118	28.8508	0.000129198	0.00694482	0	TR73393|c0_g2|m.13094	123-2075[+]	0	0	0	0	0	0	0	0	AAGTCAAGATCATATGTGAAGCTATGTGATAAAACATGACTTTCAAATTGGCGTTAGGATTAAAATTGTGATTGCAGAGGTGGTCGTACTGCAGTTGAACAAGTTCAAGTAGCAAAATAACAATGTCTCAACAAACAGGGTATACGGATACTACACCTGTCATTCCAGGACTTGGTGCTTCACCAGTACCTACGCTAATACCAAATGGTCAACCTCCTCAATGGACAAAGCCACCAATTTCGTATTCTGCGAAACAGCAGAGACCACCAGTGAACGGGCAGCGGCCTCAAAGTTCAAGTAATCCATTTGCAGCTAATGGAACACAAACGCCTCAAAACCCTGGTAGCCTGTCTTCACAATCGTCAAGGGATCCTTCGCCGGCACCGTCAAGTGCATCTA…	MSQQTGYTDTTPVIPGLGASPVPTLIPNGQPPQWTKPPISYSAKQQRPPVNGQRPQSSSNPFAANGTQTPQNPGSLSSQSSRDPSPAPSSASTLSSSTPNLASLDNTGRHPGRVPVLPSNPYTPLQTGSGSPLRIAPHGSSHPHLSAGASSGQQVQPEQRYSPAVQQMGFSSPHINGPNVGIPPTSRIVRTNMEGTVARSDVQDGSEHLDQSPKNQELQRQMPYAPPAVTQQQSSGQVPSYPQQQGQRMQGDHQASAQFMQPGQHQLQGPPTLYGGVSPQKTQGMSNVQQASPVQGAFQTVNPIFKPQVTGQQYVDQSSPSQQLLNQRKPVDRPQPQGLQSQIPAGNQYQQSTSVYENQGANPQVQQAPQLARTNLTQTPVNRLQGQNQFSSSTTNQRL…
TR77222|c0_g1	1.46169	1.62249	20.38	0.000588045	0.00845803	0	0	0	0	0	0	0	0	0	0	0	GTGTAAGGCCATTAATTGATTACCTCTTCAGGTTCTGTCACTTCACCCTTTTAAGAATGTTGAGTAAAAAATGTTATAGTGCTGTAAATGTCTGTATTATGTGTGCCAGAGTTAAACAGAACTTATTTTAAAAACCCCAACTAAGATAGTATCAGTACCCTTCTGATGACAGCTCGTGAAATCGTACTTCAAAGTAAGCTAATGTAGTGATGTTTCAAATGTGCTTATGTAGATCAAATGTGTATCTATTGTCTGTTTCACTTAAATGTTACACTGAGAGCCATGTTATCTTATGTCTGATACTAATTGTTAGTGTATAACTTGTTTGTGTACTGTTCCTACTGTCTTAATGTTAATATGAAAAATACTTTAATGGTTGTGATAGTGATTGACTAAATG…	0
TR52696|c1_g7	1.45753	6.7482	12.0164	0.0041991	0.0191222	CHI10_DROME^CHI10_DROME^Q:347-189,H:866-918^41.51%ID^E:1e-06^RecName: Full=Probable chitinase 10 {ECO:0000312|FlyBase:FBgn0250907};^Eukaryota; Metazoa; Ecdysozoa; Arthropoda; Hexapoda; Insecta; Pterygota; Neoptera; Holometabola; Diptera; Brachycera; Muscomorpha; Ephydroidea; Drosophilidae; Drosophila; Sophophora	TR52696|c1_g7|m.7169	3-407[-]	CBD1_CAEEL^CBD1_CAEEL^Q:29-69,H:1251-1291^46.34%ID^E:2e-06^RecName: Full=Chitin-binding domain protein cbd-1 {ECO:0000312|WormBase:H02I12.1};^Eukaryota; Metazoa; Ecdysozoa; Nematoda; Chromadorea; Rhabditida; Rhabditina; Rhabditomorpha; Rhabditoidea; Rhabditidae; Peloderinae; Caenorhabditis	PF01607.24^CBM_14^Chitin binding Peritrophin-A domain^29-73^E:1.6e-13	0	0	ENOG41121EJ^chitin binding	KEGG:cel:CELE_H02I12.1	GO:0071944^cellular_component^cell periphery`GO:0005576^cellular_component^extracellular region`GO:0008061^molecular_function^chitin binding`GO:0006030^biological_process^chitin metabolic process`GO:0030703^biological_process^eggshell formation`GO:0007275^biological_process^multicellular organism development`GO:1904778^biological_process^positive regulation of protein localization to cell cortex`…	GO:0008061^molecular_function^chitin binding`GO:0006030^biological_process^chitin metabolic process`GO:0005576^cellular_component^extracellular region	GCATGGGGAAGGTGCTTAGCAATTGAATTCTCATCTTCATTCTGTGGACATGTTCCGACAGCTGGGCAGTCTCCTGATGGAGCAGGTTTAGCTGTGGAACTTGGAGCTGATGTTGGAGCAGCTGTAGTGGCAGCACTTGTAGGAGCAGATGTGGAGCTGGGAGCTGAGGTTGATGCTGATCCACCTGTGCAACCAGCATTTGCTGGCCAGTCACACACCTCCAAGGTAGGGTTGAAGTGAAGTCCAGCAGGACAGTCGAAGGTCACGGGTTTCCCATGGTCACATTTGCAGAACTGACTGCAGTTTGAGGCATGGGGAAGGTGCTTAGCAATTGAATTCTCATCTTCATTCTGTGGACATGTTCCGACAGCTGGGCAGTCTCCTGATGGAGCAGGTTTA…	STAKPAPSGDCPAVGTCPQNEDENSIAKHLPHASNCSQFCKCDHGKPVTFDCPAGLHFNPTLEVCDWPANAGCTGGSASTSAPSSTSAPTSAATTAAPTSAPSSTAKPAPSGDCPAVGTCPQNEDENSIAKHLPH
TR51342|c0_g3	1.45656	4.59105	14.0376	0.00246047	0.0143211	CHIT_BRUMA^CHIT_BRUMA^Q:124-258,H:451-494^44.44%ID^E:1e-05^RecName: Full=Endochitinase;^Eukaryota; Metazoa; Ecdysozoa; Nematoda; Chromadorea; Rhabditida; Spirurina; Spiruromorpha; Filarioidea; Onchocercidae; Brugia	0	0	0	0	0	0	0	0	GO:0005576^cellular_component^extracellular region`GO:0008061^molecular_function^chitin binding`GO:0004568^molecular_function^chitinase activity`GO:0006032^biological_process^chitin catabolic process`GO:0000272^biological_process^polysaccharide catabolic process	0	ACTCTGAGCAGACACACCTACAACATGAGAGGACTGCCATTTATTGCGACTGCCATTGTGGTGGTTTTGGTTGGAGGCGCCAGTGCAGCATCCCTCCGCAGACTGACCGTTGTCAGTGCAACATGCCAGGGAGCGTCCGGTCCATTTCCGAATCCGAACAGCTGCAGAAGCTTCCTGCAGTGCGAGCCGTCTGGAGTCGCAACGGTCATCCCATGCCCAGCAAACCTCGAGTTTAATCCAAATCTGAAGGTGTGTGACTTCCCAGAGAGAGCTGGTTGCT	0
TR104907|c0_g1	1.45624	3.29252	10.9644	0.00565493	0.0226652	CP6K1_BLAGE^CP6K1_BLAGE^Q:1-480,H:362-521^45%ID^E:2e-39^RecName: Full=Cytochrome P450 6k1;^Eukaryota; Metazoa; Ecdysozoa; Arthropoda; Hexapoda; Insecta; Pterygota; Neoptera; Polyneoptera; Dictyoptera; Blattodea; Blaberoidea; Ectobiidae; Blattellinae; Blattella	TR104907|c0_g1|m.994	34-486[+]	CP6K1_BLAGE^CP6K1_BLAGE^Q:7-149,H:379-521^45.45%ID^E:2e-37^RecName: Full=Cytochrome P450 6k1;^Eukaryota; Metazoa; Ecdysozoa; Arthropoda; Hexapoda; Insecta; Pterygota; Neoptera; Polyneoptera; Dictyoptera; Blattodea; Blaberoidea; Ectobiidae; Blattellinae; Blattella	PF00067.22^p450^Cytochrome P450^4-136^E:2.7e-44	0	0	0	0	GO:0005789^cellular_component^endoplasmic reticulum membrane`GO:0020037^molecular_function^heme binding`GO:0005506^molecular_function^iron ion binding`GO:0004497^molecular_function^monooxygenase activity`GO:0016705^molecular_function^oxidoreductase activity, acting on paired donors, with incorporation or reduction of molecular oxygen	GO:0005506^molecular_function^iron ion binding`GO:0016705^molecular_function^oxidoreductase activity, acting on paired donors, with incorporation or reduction of molecular oxygen`GO:0020037^molecular_function^heme binding`GO:0055114^biological_process^oxidation-reduction process	GGCGGTCAGCCCACATACGAAGCCCTCAACGAAATGACGGACCTCACCAACGTCGTCAATGAGGCGCTGCGGATGTATCCACCTGTCAACTTCCATGACCGCGAGGCGTCCCGGGACTACAAGATCCCTGGTACTGACATCGTCCTTCCCAAGGGGACCGGTGTCGTCTTCTCGGTCACTGGCCTGCATAACGACCCACGGTACTGGAAGGAACCCCACAGGTTCATGCCGGATCGCTTCAGAGAAGAAAACTCCAAGGACAGGCCGAGCTACACTTTCTTGCCGTTCGGCGAGGGACCGAGGCTGTGTATAGGCATGAGGGTGGCATACCTGCAGATAAAACTCGGCCTCGTCCACATCCTCAACAACTTCGAGGTGCTTCCAGCGCCAGACACGCCC…	MTDLTNVVNEALRMYPPVNFHDREASRDYKIPGTDIVLPKGTGVVFSVTGLHNDPRYWKEPHRFMPDRFREENSKDRPSYTFLPFGEGPRLCIGMRVAYLQIKLGLVHILNNFEVLPAPDTPSSLRYEPSKFIGTPAGKVALRFRKIPAP*
TR68028|c0_g1	1.45452	9.18607	7.7663	0.0154677	0.0435569	ARSB_MOUSE^ARSB_MOUSE^Q:2194-1118,H:41-398^42.9%ID^E:1e-89^RecName: Full=Arylsulfatase B;^Eukaryota; Metazoa; Chordata; Craniata; Vertebrata; Euteleostomi; Mammalia; Eutheria; Euarchontoglires; Glires; Rodentia; Myomorpha; Muroidea; Muridae; Murinae; Mus; Mus`ARSB_MOUSE^ARSB_MOUSE^Q:2506-2312,H:278-341^43.08%ID^E:4e-07^RecName: Full=Arylsulfatase B;^Eukaryota; Metazoa; Chordata; Craniata; Vertebr…	TR68028|c0_g1|m.11300	929-2248[-]	ARSB_MOUSE^ARSB_MOUSE^Q:15-377,H:37-398^42.7%ID^E:5e-95^RecName: Full=Arylsulfatase B;^Eukaryota; Metazoa; Chordata; Craniata; Vertebrata; Euteleostomi; Mammalia; Eutheria; Euarchontoglires; Glires; Rodentia; Myomorpha; Muroidea; Muridae; Murinae; Mus; Mus	PF00884.23^Sulfatase^Sulfatase^24-341^E:3.3e-62`PF01663.22^Phosphodiest^Type I phosphodiesterase / nucleotide pyrophosphatase^27-283^E:4.4e-07	sigP:1^21^0.848^YES	0	COG3119^Sulfatase	KEGG:mmu:11881`KO:K01135	GO:0009986^cellular_component^cell surface`GO:0005794^cellular_component^Golgi apparatus`GO:0005764^cellular_component^lysosome`GO:0005739^cellular_component^mitochondrion`GO:0005791^cellular_component^rough endoplasmic reticulum`GO:0004065^molecular_function^arylsulfatase activity`GO:0046872^molecular_function^metal ion binding`GO:0003943^molecular_function^N-acetylgalactosamine-4-sulfatase acti…	GO:0008484^molecular_function^sulfuric ester hydrolase activity`GO:0003824^molecular_function^catalytic activity	TTTTACGATATGTGACACACTTTTATTGGTATTTCAACTAGGTACATCAAAGCACTGGTACAAAATAGAGAGGGAAGGATCTACGTGATGACGTTGCACATGGGGTCCGTCTCGTCTTGGAGGCAGTCGACCCAGGGCACCCAGGTGTTGTTCCAGCGCTTGGGGTCGGCCTCTGCGGTCTGCGTGACGTTGGACCCCGGCTGCGGCATCAGAGGCTGCGACAGCGTCTCCAGCCGTTCCAGCAGAGTGTCCACCAGGCCCTCCGGCATGTCGGCGGGCGAGCCGTCGCCCGCCTCGCACGGGTTTTTTTTTTTTTTTTTTTTTTTTTTTTTTTTTTTTTTTTTTTTTTTACGATATGTGACAGCCATTTATTGCTCTTTACATAGCTACATCACACTA…	MRLLLVVASVWLVAAVGQAGAKPPNIVFIVADDMGWNDVSFHGSDQVPTPNIDALAYHGVILNGHYVQPVCTPSRSAIMTGKYPVRLGMQGHVILGDEVHALPEGKILPQYLKDLGYVTRAIGKWHLGHYSKVYTPTYRGFDSHLGYWNAGVGYYDYIFADRGAHGYDLRENLTTAWQYNGKYATDVFTEEAERLIREHDAERPLFLYFAHLACHPGDHSQLINAPQDLINSFSYISHPDRRILAAVMAKMDESVGRVVTALHERDMLNNSIIVFVADNGAGSDVNWGSNFPFRGIKNSLWEGAVHGVAAVWSPLLQNTSRVDHELMHISDWLPTLYAAAGGNASDLPDDLDGVNMWPRLVSGEPSQRTEILLNYDEVAETRYSSTTTKWLRTAPSASA…
TR70703|c0_g1	1.45252	9.89177	10.682	0.00614072	0.0237895	PE1_ANOGA^PE1_ANOGA^Q:436-65,H:34-147^35.48%ID^E:2e-14^RecName: Full=Peritrophin-1;^Eukaryota; Metazoa; Ecdysozoa; Arthropoda; Hexapoda; Insecta; Pterygota; Neoptera; Holometabola; Diptera; Nematocera; Culicoidea; Culicidae; Anophelinae; Anopheles`PE1_ANOGA^PE1_ANOGA^Q:424-299,H:111-152^52.38%ID^E:9e-06^RecName: Full=Peritrophin-1;^Eukaryota; Metazoa; Ecdysozoa; Arthropoda; Hexapoda; Insecta; Pte…	TR70703|c0_g1|m.12375	2-580[-]	PE1_ANOGA^PE1_ANOGA^Q:49-177,H:34-152^35.66%ID^E:9e-16^RecName: Full=Peritrophin-1;^Eukaryota; Metazoa; Ecdysozoa; Arthropoda; Hexapoda; Insecta; Pterygota; Neoptera; Holometabola; Diptera; Nematocera; Culicoidea; Culicidae; Anophelinae; Anopheles	PF01607.24^CBM_14^Chitin binding Peritrophin-A domain^42-93^E:7.7e-13`PF01607.24^CBM_14^Chitin binding Peritrophin-A domain^131-176^E:2.2e-11	sigP:1^26^0.863^YES	ExpAA=21.26^PredHel=1^Topology=i7-29o	0	KEGG:aga:AgaP_AGAP006795	GO:0005576^cellular_component^extracellular region`GO:0008061^molecular_function^chitin binding`GO:0006030^biological_process^chitin metabolic process	GO:0008061^molecular_function^chitin binding`GO:0006030^biological_process^chitin metabolic process`GO:0005576^cellular_component^extracellular region	TAGAGCTACCGGCTGGCTTGCCTCCACTGATACTGCCACCAGAAGATACGCTGCAGCCAGCAGATTCGGGGTAGTCGCAAGCGTCTGCTTCGTCATTCCACTCGAGACCTGCTGGGCAGGGGATCAACACCGGCTCTCCATCGAGACCACACTTATAGAAGCTGCTGCAGTCCTCAGGATTGGGAAAATGGACAACAACATTTGGATCAGCAGGGTAAGGACATTCAGGTAAAGAAGAAGATCCACTGGGTGTGTCATTGTTGGCTGATGTGCCCACTCCGTCAGAAGAAGAGGATACTTCACACTTAGCACTCTCTGGGTAATCGCACTGGGCGGTTTTACGGTTGAAGTGGAGTCCAGATGGGCAGGGCCGCACTAGAACGATGCCATCCCCAATGC…	RNTAAMAGNVLLAVLSVVALLTSAHGTNLSLNKQVKRNHPACSSPSGPFVNPTDCTTYYQCIGDGIVLVRPCPSGLHFNRKTAQCDYPESAKCEVSSSSDGVGTSANNDTPSGSSSLPECPYPADPNVVVHFPNPEDCSSFYKCGLDGEPVLIPCPAGLEWNDEADACDYPESAGCSVSSGGSISGGKPAGSS
TR70720|c0_g2	1.45151	7.13636	15.7996	0.00159847	0.0118138	0	0	0	0	0	0	0	0	0	0	0	TCCAGTTGGAAAGGTAAGCCGCTCTCCGCTCTGCAGTAGATTAGACTTGGCTTCCTTCCCTCGTACCTCCTGCTGACTCGCCGCTTTCCTGTGCAGATGCGCTCCTTCCTGCTGTTCGCTGCCGTTGTGGGACTCGCCTGCGGCGCTGCGGTGCCCAAAGGCCTACATCAAGAGAAACACCACCGTTTCTCTGCATCACGATCCAACCGCAACCTCCAAGATGACCTGAACGACTTCCTGGCCCTCATCCCCGTCGACGAAATCGTCAAC	0
TR99906|c1_g1	1.44662	1.14541	10.8607	0.00582782	0.022998	MYRO1_BREBR^MYRO1_BREBR^Q:1365-445,H:146-458^43.12%ID^E:2e-79^RecName: Full=Myrosinase 1 {ECO:0000303|PubMed:11804799};^Eukaryota; Metazoa; Ecdysozoa; Arthropoda; Hexapoda; Insecta; Pterygota; Neoptera; Paraneoptera; Hemiptera; Sternorrhyncha; Aphidomorpha; Aphidoidea; Aphididae; Macrosiphini; Brevicoryne	TR99906|c1_g1|m.19652	424-1365[-]	MYRO1_BREBR^MYRO1_BREBR^Q:1-307,H:146-458^43.12%ID^E:3e-81^RecName: Full=Myrosinase 1 {ECO:0000303|PubMed:11804799};^Eukaryota; Metazoa; Ecdysozoa; Arthropoda; Hexapoda; Insecta; Pterygota; Neoptera; Paraneoptera; Hemiptera; Sternorrhyncha; Aphidomorpha; Aphidoidea; Aphididae; Macrosiphini; Brevicoryne	PF00232.18^Glyco_hydro_1^Glycosyl hydrolase family 1^1-311^E:1.1e-71	0	0	0	0	GO:0102799^molecular_function^glucosinolate glucohydrolase activity`GO:0046872^molecular_function^metal ion binding`GO:0019137^molecular_function^thioglucosidase activity`GO:0005975^biological_process^carbohydrate metabolic process	GO:0004553^molecular_function^hydrolase activity, hydrolyzing O-glycosyl compounds`GO:0005975^biological_process^carbohydrate metabolic process	AGATTTTGAAAATATGCAAGGTAAAATGCTCTCAATGAAGTTATGATAATAATAATAATTAAAAAACGAAGTGACAAGACAGGATTGATAATTTTAAATGTCAAATCACATTTTTACATAAAAACAGCAGAATAATGTCGTTATTTTTCAATTAGTCGTGCAAATTTAGTTAGTATGGTTGAGGTAGTACATGTTGAAGGTTTAAAATTTCTTGCTTTCATTGCACTTGAAGGAGATGTTATTACGCTAACAGTGACTTGTCACATTCATTCCCTGGAACTGATTGCAAATGTTTTATTTGTTACAGTGCTGAATAATTAAAAAAATTGTATGATCGCCGAATACCCCTTGAAATAGGCTTTACTGGCGTCTACAACGACACTAGAGCCCAAGTCTTCT…	EYARILLDNFGDRVKWWTTFNEPPVIAWGYSCGIGEGPAPNQNASGIGNYLTGHTILRAHALVYRLYDEQYRATQNGTVGITLNTDWYEPLSDSEEDRAASERMLQFQLGLFAHPIFSSSGDYPAVVRERVDANSIAEGRPRSRLPSFTPEEVESIRGSADFLGINHYRSYYTTSGESGLSPSLDRDSGVIRSQLGEVAWGMRKLLNWIKAEYEDYPVFITENGHESSDLGLNDTARVEYYKNYLTALLDSINIDGCRVIGYTAWTLMDNYEWGRGLSMRLGLHYVDFDDPERPRTARDSAKYLSTVYKSKRL*
TR38239|c0_g3	1.44445	4.93835	23.3193	0.000333377	0.00733976	MOCS1_DROME^MOCS1_DROME^Q:519-1505,H:39-367^69.09%ID^E:3e-154^RecName: Full=Molybdenum cofactor biosynthesis protein 1;^Eukaryota; Metazoa; Ecdysozoa; Arthropoda; Hexapoda; Insecta; Pterygota; Neoptera; Holometabola; Diptera; Brachycera; Muscomorpha; Ephydroidea; Drosophilidae; Drosophila; Sophophora`MOCS1_DROME^MOCS1_DROME^Q:1810-2343,H:372-553^55.74%ID^E:1e-49^RecName: Full=Molybdenum cofactor …	TR38239|c0_g3|m.3233	456-1562[+]	MOCS1_DROME^MOCS1_DROME^Q:22-350,H:39-367^69.09%ID^E:3e-163^RecName: Full=Molybdenum cofactor biosynthesis protein 1;^Eukaryota; Metazoa; Ecdysozoa; Arthropoda; Hexapoda; Insecta; Pterygota; Neoptera; Holometabola; Diptera; Brachycera; Muscomorpha; Ephydroidea; Drosophilidae; Drosophila; Sophophora	PF04055.21^Radical_SAM^Radical SAM superfamily^57-217^E:3.6e-31`PF13353.6^Fer4_12^4Fe-4S single cluster domain^60-164^E:5.3e-08`PF06463.13^Mob_synth_C^Molybdenum Cofactor Synthesis C^224-350^E:4.6e-40	0	0	COG0315^Together with MoaA, is involved in the conversion of 5'- GTP to cyclic pyranopterin monophosphate (cPMP or molybdopterin precursor Z) (By similarity)`COG2896^Catalyzes, together with MoaC, the conversion of 5'-GTP to cyclic pyranopterin monophosphate (cPMP or molybdopterin precursor Z) (By similarity)	KEGG:dme:Dmel_CG33048`KO:K20967	GO:0019008^cellular_component^molybdopterin synthase complex`GO:0051539^molecular_function^4 iron, 4 sulfur cluster binding`GO:0061799^molecular_function^cyclic pyranopterin monophosphate synthase activity`GO:0061798^molecular_function^GTP 3',8'-cyclase activity`GO:0005525^molecular_function^GTP binding`GO:0046872^molecular_function^metal ion binding`GO:0002121^biological_process^inter-male aggre…	GO:0003824^molecular_function^catalytic activity`GO:0051536^molecular_function^iron-sulfur cluster binding`GO:0051539^molecular_function^4 iron, 4 sulfur cluster binding`GO:0006777^biological_process^Mo-molybdopterin cofactor biosynthetic process`GO:0019008^cellular_component^molybdopterin synthase complex	TGACTTGGTGCTTTCAAAGGCCAAGTTTACGCAAAGAGGGAGAGGAGATGATAAGGCAGAGGACGAAAAGGGGGAACGACAAGCCCCGCAGAGAGAGTCTGCGTGCGACCATGAAAAGCCTGGGAAGAATAGAGACTAATTGGGAGAGCGACGCTGTTGCATATACACAACACGTCTGCTATTACTGCACAACTCGAATAACAGACCCACAGACTTCCCACGCGCCGTGAGAAAACAATTTCTTTACGTGTCGTCTATCGTGTCTCGTGTACGACTACCTACTGACGCTCTCAAAGTTTAATCCTTTCTAATCGTCGAGATTAAATTGGTGTTTTTCTTCGTCTGCAGTCCAAGATAAATGTACTCCTTTGTATGAGTGTATTCATGCAAGTGCTCTCC…	MLLRMLKRTTCVSRSLFTDANNSQISAVGALVKEKASVEEQNILTDTFGRYHTYLRISLTERCNLRCQYCMPEEGVTLTKKEKLLTMDEIIYLAELFVKQGVRKIRLTGGEPTVRRDIVDIVGALKKIKNLESVLMTTNGLMLTRQLVALQRAGLDGLNISLDTLQSQRYNQITRRKGWERVMAGIDLALQLEYDPVKINCVVMRGFNEDEVCSFVELTKDKNVDVRFIEYMPFSGNKWNDGKMVSFSEMLQIIRKQWPDFEPLPNGPNDTSKAYHVPGFKGRVGFITSMSEHFCGTCNRLRITADGNLKVCLFGNSEISLRDAIRSKCSEDDLLAMIGAAVRRKKKQHAGMMNLSKMKNRPMILIGG*
TR53971|c0_g1	1.4421	1.52323	88.9944	3.6518e-07	0.00224281	0	0	0	0	0	0	0	0	0	0	0	CATAGGCACGTCTTCCAGTCCCCGATTTTGATGTAATGAATGCGTAAAAAAAAAAAAAAAAACCTCTGTGCTTAACGTGAGTTCTGATACTTTATGAAACCCTGTACCCCTCAACCCTCTTCAAACACCTAGAAGCTTTGGGGAGTCTCACAAGAGAAACGTGTTTCGACCATTTAATTCCACAATGTAGGGCACGTTTTTAAATTGTGGGTTGCATTTTCTTGTCTCCTAGTCGTGGG	0
TR43666|c0_g1	1.43068	0.98541	15.0365	0.00191976	0.0127282	0	0	0	0	0	0	0	0	0	0	0	TTGCTATGTAACAAAAAAAAAGTCTTTTGAGCGTATCAAAGACATGTTCACATGAGGATGAGGAATTCTAAAGACTCTTAGTATCTCATGGAATCGCAGGTTTCAAGATTTCATTATAACATATTGCATATTCTTGTTTTTCCTTCATAAATTTTTCAGATGAAACACGAACAGAAAATTCTGAGCCTATCAAAGATATGTTCACCTAATGACGAGGAGGTCTGAAAACATTTAGTAGTTTGCAGAACCACAGATTTCATTGAATCACATTGTGTATTCACATTTATTTTCAATAATTTTAATAATGCAGTGCAGTTTGATATGTATCACAGACTTGTTGATCTAAGAAATGTATGAGATGGTATCATTTAG	0
TR47128|c0_g1	1.42994	2.02441	9.78717	0.00803407	0.0280728	0	0	0	0	0	0	0	0	0	0	0	GTGGTGGTGTGTGTATGTGTGTGTGTGTGTGTATGTGTATGTGTGTGTATGTCTGTGTGTGATACTCGACATATGTATCAATTTGCAGCATGTCATGTACCGTAGGCTAGTGGGACAAGATTGTGTTTAAAGGCTACCAATAAAACGAAATAAAAAAAGAGAAAGTACACCTCATCTGTATATGCTTAACATTGCTTCAGTTTAGGGGCAGTCTGAACGTCACAAGACTCAGGGTAGCCAATATCGCTAGCAGTTCTTTTTATTATTATGTTTACTAGTATAACCGTTTTAGACAGGTCTATGCTGTCATCAACGGATTTTGTAACATAATCAGTTGCACACGCTGGTACATCACAGCATGTAGTATGTTTTAATCCTTCAAGAATAATGCACTTAATC…	0
TR48721|c0_g1	1.42805	1.23128	19.5851	0.000691879	0.00884041	0	0	0	0	0	0	0	0	0	0	0	GGCAAATTGTTGTGTAATCTTGCTGCGCATCCTTTCATACGTGACAATGACTCCCTCCTTTTATACATTTGACACGTGTAAAAGAAAGACGTCAGGGAGATCCTCATAATGACAATGAGCTACATTGTGGAAATATTACGCTAAGAAGATACAACAGTTTGCTAGCAGGAGTGTGTGTGTGTAGTATTTGCTCACAGCATCTTCGTACTATGTAAGCCGTCTCTGATAGTACCAGCGCTTCAGATGTTTAGTAAAGACATGTGCTGTTACTCGCCTTTCCTTCACACGCTTGTGAGACAGTAGACGATA	0
TR46352|c0_g1	1.42712	0.831217	12.0499	0.00416051	0.0190028	MYRO1_BREBR^MYRO1_BREBR^Q:1-444,H:294-451^42.5%ID^E:4e-33^RecName: Full=Myrosinase 1 {ECO:0000303|PubMed:11804799};^Eukaryota; Metazoa; Ecdysozoa; Arthropoda; Hexapoda; Insecta; Pterygota; Neoptera; Paraneoptera; Hemiptera; Sternorrhyncha; Aphidomorpha; Aphidoidea; Aphididae; Macrosiphini; Brevicoryne	TR46352|c0_g1|m.5520	1-498[+]	MYRO1_BREBR^MYRO1_BREBR^Q:1-148,H:294-451^42.5%ID^E:8e-34^RecName: Full=Myrosinase 1 {ECO:0000303|PubMed:11804799};^Eukaryota; Metazoa; Ecdysozoa; Arthropoda; Hexapoda; Insecta; Pterygota; Neoptera; Paraneoptera; Hemiptera; Sternorrhyncha; Aphidomorpha; Aphidoidea; Aphididae; Macrosiphini; Brevicoryne	PF00232.18^Glyco_hydro_1^Glycosyl hydrolase family 1^2-160^E:3.4e-35	0	0	0	0	GO:0102799^molecular_function^glucosinolate glucohydrolase activity`GO:0046872^molecular_function^metal ion binding`GO:0019137^molecular_function^thioglucosidase activity`GO:0005975^biological_process^carbohydrate metabolic process	GO:0004553^molecular_function^hydrolase activity, hydrolyzing O-glycosyl compounds`GO:0005975^biological_process^carbohydrate metabolic process	ATCGAGTACCTTAGAGGGTCTGCTGACTTTTTCGGACTGAATCACTACAGGACATACTATGCGGCGGCAGGAGAGACAGGACCAGTCCCTTCAAAGAGGCGAGATTCTGGAGCGTACACCACAAGCAGCAACGAGAACAATCCCGCAGGCTTGCGGAAAATACTGAACTGGATAACTGCAGAGTATCCCGGTTACCCTATCTTCGTGACAGAGAACGGCTATGGTGACTCTGGAGGCCTGAATGACACGGGCAGGGTGGAATACCTGACTAACTACCTGAGCGCGCTGCTGGAAGCGATCAACACTGACGGAGTGGAGGTACTCGGCTACACCATGTGGACCCTCATGGATAACATGGAATGGACCAGCGGCTTCTCGATCAAGATGGGCCTGTATGAA…	IEYLRGSADFFGLNHYRTYYAAAGETGPVPSKRRDSGAYTTSSNENNPAGLRKILNWITAEYPGYPIFVTENGYGDSGGLNDTGRVEYLTNYLSALLEAINTDGVEVLGYTMWTLMDNMEWTSGFSIKMGLYEVDFDSANKTRTPRLSAYAMSEIFESKQLSVLN*
TR52322|c0_g1	1.42604	6.03371	11.2335	0.00523311	0.0216631	0	0	0	0	0	0	0	0	0	0	0	GCCAGGAAGTCGTTCAGGTCATCCTGCAGGTTGCGGCTAGATTTTTTTGCTGGGAAACGCTGGATCATCTTTGCACCTCGGATTGGCCCTGAAAATGAGATATCGTGTATCAGTGCATCTTTTTTGCTCTTTTGCAAAATTCTGTTGAAAGTCTCATCACAGTTGCACACATTGTTGTGGACCATTGCATAACTATTTAATGATAGTGTAAAACGTTGGACAGTTTAGTCAGTGCTGAGCAAGTGAACAATGTGTCTTTGGTTTTTCCTAGAAGTTATGTAATATCGTACACACACTATTTCTTTTTTTTGTAGGATGTAGAAGAACTAGATAGAACAGCCCCTTATTCTCGTGCCTATCCACCGACATTGAGTTATTCTGTCAGTTACATAAATTGTT…	0
TR89712|c0_g1	1.42178	5.38174	18.5335	0.000863608	0.00943978	ABCG4_HUMAN^ABCG4_HUMAN^Q:3492-2362,H:271-646^36.94%ID^E:1e-75^RecName: Full=ATP-binding cassette sub-family G member 4;^Eukaryota; Metazoa; Chordata; Craniata; Vertebrata; Euteleostomi; Mammalia; Eutheria; Euarchontoglires; Primates; Haplorrhini; Catarrhini; Hominidae; Homo	TR89712|c0_g1|m.16982	2359-3495[-]	ABCG4_HUMAN^ABCG4_HUMAN^Q:2-378,H:271-646^37.08%ID^E:1e-86^RecName: Full=ATP-binding cassette sub-family G member 4;^Eukaryota; Metazoa; Chordata; Craniata; Vertebrata; Euteleostomi; Mammalia; Eutheria; Euarchontoglires; Primates; Haplorrhini; Catarrhini; Hominidae; Homo	PF01061.24^ABC2_membrane^ABC-2 type transporter^106-314^E:2.5e-41	0	ExpAA=135.87^PredHel=6^Topology=i129-147o157-179i199-221o236-258i265-287o348-370i	COG1131^(ABC) transporter	KEGG:hsa:64137`KO:K05680	GO:0016021^cellular_component^integral component of membrane`GO:0005886^cellular_component^plasma membrane`GO:0005524^molecular_function^ATP binding`GO:0016887^molecular_function^ATPase activity`GO:0042626^molecular_function^ATPase-coupled transmembrane transporter activity`GO:0046982^molecular_function^protein heterodimerization activity`GO:0042803^molecular_function^protein homodimerization act…	GO:0016020^cellular_component^membrane	ACGTCCTCTTCCTTTTATTGAGTATTATCAGCTACTGATATTAGCACCAATGATTGGATGATTTTTTTGTATTACTGTTCCATGTTTGGAATAATATAAGAGTCTTAATCATAGTAATGCAATACTGAAAATATTTAGGAAATTCTTCTGAAAAATGGGATATGTTCGGTATGTTAAAACATACTGATCACCAATACGTAAAGAACGAGTTGAATTGCTTCTGAAAGCATGTTTTTAGAAATATTTCTTGCAGCCACATACTGATAGAAAATTTTACTTCAGCTACATAGTCTTGAATTTGAAACACCAAAATATGTATGTCATCTTTATCTCAGTCAGAAGTAGAAGTTCTTATCATATTCATGTCATGTCTTTAGGTACACTTATTACAGACAAGAA…	HVYVLARGECLYQGSADNLVPYLSAVQLPCPMYHNPADYVIELACGDYGEDKIDRLVEGTENGRTLQWFAEPEALAYQKPPRRSRSKSLGFQKVSRNLQETSQLNQLKVLLRRGFIKVKRDQTLTHMRLLVNILTGIMLGVLFIEAGDDGARVLDNYNLLFGILMHHMMTTMMLTILTFPMEMNILKKEHFNRWYSLKSYYVSTTIVDIPVAVLCCAIFSVLVYLMSSQPLVWERFGMFFVISMLVVFVAQSFGLMIGAVFSVVNGTFLGPTLSVPMMMFAGFGVTLRDLPSYLYWGSYISYLRYGLEGYVTAIYGMDRPKLDCSVFYCHYRIPSVFLDTIAMGHTPFWVDVVALCGILLALRVAAYFLLRWKLYAVR*
TR71843|c0_g1	1.41803	2.2699	13.6153	0.00274092	0.0151495	CHS2_CAEEL^CHS2_CAEEL^Q:343-2,H:85-197^32.2%ID^E:1e-05^RecName: Full=Chitin synthase chs-2 {ECO:0000305};^Eukaryota; Metazoa; Ecdysozoa; Nematoda; Chromadorea; Rhabditida; Rhabditina; Rhabditomorpha; Rhabditoidea; Rhabditidae; Peloderinae; Caenorhabditis	TR71843|c0_g1|m.12509	2-418[-]	CHS2_CAEEL^CHS2_CAEEL^Q:21-139,H:80-197^31.71%ID^E:3e-07^RecName: Full=Chitin synthase chs-2 {ECO:0000305};^Eukaryota; Metazoa; Ecdysozoa; Nematoda; Chromadorea; Rhabditida; Rhabditina; Rhabditomorpha; Rhabditoidea; Rhabditidae; Peloderinae; Caenorhabditis	0	0	ExpAA=25.66^PredHel=1^Topology=o64-86i	COG1215^Glycosyl transferase, family 2	0	GO:0016021^cellular_component^integral component of membrane`GO:0005886^cellular_component^plasma membrane`GO:0004100^molecular_function^chitin synthase activity`GO:0006031^biological_process^chitin biosynthetic process`GO:0007275^biological_process^multicellular organism development`GO:0061063^biological_process^positive regulation of nematode larval development	0	GGATGAATGTGCCTAGTTCTGGGACAGCATACGCAATCAGTATACACCACATCCATGCCACTCTTTCTTCTTCAGGTAATTCTGCAGCAAATTGTTTTTCACCACCAAGTCCTTTGTTGCAGTAGACCGTTTGCTTTCCTTTTCTGAGTTGTGATGTCATGAATAGCACAGTTCCTTTAACTAAGACTGCTGAACCAAGCACTACCACCGTAGTGAAAATAATAGCTAATACTTTCACTACCTTAGTAAGAGTCACTAGGGCAAGTTTGTCACTAACAGAACCACTGCTCTCTCGTATAGGAGGATCCCGGAAGACATCCCATGGTTTTCTCTCCTGCTGTGTCCTCTGGCCCACATCTTCATCCCCATCGTAGCTGGAGTCATCTTCGGTGGATTCTA…	MNGVNPIESTEDDSSYDGDEDVGQRTQQERKPWDVFRDPPIRESSGSVSDKLALVTLTKVVKVLAIIFTTVVVLGSAVLVKGTVLFMTSQLRKGKQTVYCNKGLGGEKQFAAELPEEERVAWMWCILIAYAVPELGTFI
TR106183|c0_g1	1.41606	0.4539	28.614	0.000134179	0.00694482	TMLH_RAT^TMLH_RAT^Q:2-550,H:76-244^30.81%ID^E:1e-21^RecName: Full=Trimethyllysine dioxygenase, mitochondrial;^Eukaryota; Metazoa; Chordata; Craniata; Vertebrata; Euteleostomi; Mammalia; Eutheria; Euarchontoglires; Glires; Rodentia; Myomorpha; Muroidea; Muridae; Murinae; Rattus	TR106183|c0_g1|m.1211	2-550[+]	TMLH_RAT^TMLH_RAT^Q:1-183,H:76-244^30.81%ID^E:1e-21^RecName: Full=Trimethyllysine dioxygenase, mitochondrial;^Eukaryota; Metazoa; Chordata; Craniata; Vertebrata; Euteleostomi; Mammalia; Eutheria; Euarchontoglires; Glires; Rodentia; Myomorpha; Muroidea; Muridae; Murinae; Rattus	PF06155.12^DUF971^Protein of unknown function (DUF971)^1-63^E:6.8e-06`PF02668.16^TauD^Taurine catabolism dioxygenase TauD, TfdA family^102-180^E:8.5e-05	0	0	COG2175^dioxygenase	KEGG:rno:170898`KO:K00474	GO:0005759^cellular_component^mitochondrial matrix`GO:0005739^cellular_component^mitochondrion`GO:0005506^molecular_function^iron ion binding`GO:0016702^molecular_function^oxidoreductase activity, acting on single donors with incorporation of molecular oxygen, incorporation of two atoms of oxygen`GO:0050353^molecular_function^trimethyllysine dioxygenase activity`GO:0045329^biological_process^carn…	GO:0016491^molecular_function^oxidoreductase activity`GO:0055114^biological_process^oxidation-reduction process	GTTAAGAGACAACTGCAAGTGTCCTCTCTGTGTTCACGAGGAGACTCGTCAGAAACTTTTAGACACTCCCTCGTTGGATGTGGGTATTAAGCCCAAGTCTTTGACAGTCACAGACTCTGGAAACCTGGTCATATCCTGGCAGGAAAAAGGGCAAGACCACATTTCAACATATGATTATAGTTGGTTATACCGTTATGGGCAGAGTTTCATACATGAAACCTTTGAATCTGAATCTGATGGTCACCACATTTCACGCCCTCCATTAGTCTTGTGGGACAGAACAGAAATATGGAAAAATTTGCCTGAAATTTCATACAATGAAGTAGTCAGCAGTGAAGAAGGACTGCGTTCGTGGCTTGAAATGTTTTACAAATATGGAATAGCTTTAATGAGAAATGT…	LRDNCKCPLCVHEETRQKLLDTPSLDVGIKPKSLTVTDSGNLVISWQEKGQDHISTYDYSWLYRYGQSFIHETFESESDGHHISRPPLVLWDRTEIWKNLPEISYNEVVSSEEGLRSWLEMFYKYGIALMRNVPPVQGQLVELVKRFAYVKETQYGLTFDVVNEPDPHAHPAFSGLYLHHHTD
TR78861|c0_g1	1.41453	1.31063	17.8936	0.000992221	0.00993575	MDR1A_MOUSE^MDR1A_MOUSE^Q:218-9,H:344-413^52.86%ID^E:2e-18^RecName: Full=ATP-dependent translocase ABCB1 {ECO:0000250|UniProtKB:P08183};^Eukaryota; Metazoa; Chordata; Craniata; Vertebrata; Euteleostomi; Mammalia; Eutheria; Euarchontoglires; Glires; Rodentia; Myomorpha; Muroidea; Muridae; Murinae; Mus; Mus`MDR1A_MOUSE^MDR1A_MOUSE^Q:215-3,H:988-1058^28.17%ID^E:1e-05^RecName: Full=ATP-dependent tran…	0	0	0	0	0	0	COG1132^(ABC) transporter	KEGG:mmu:18671`KO:K05658	GO:0045177^cellular_component^apical part of cell`GO:0016324^cellular_component^apical plasma membrane`GO:0031526^cellular_component^brush border membrane`GO:0009986^cellular_component^cell surface`GO:0016021^cellular_component^integral component of membrane`GO:0046581^cellular_component^intercellular canaliculus`GO:0016020^cellular_component^membrane`GO:0005886^cellular_component^plasma membrane…	0	CCACGGTTGATGGTCAAGTTGAGTCCACGCAGAATCTTGACGCCTTTTCGAGACGGATATTCGAAGTGAACGTTCTTGAAGCTCACGTTGCCATTGACTTCCTTGAGCCTGTGGCCCTCCTCAGACATGCTGTTGATTGGAGATACCCGGTCCACCACGCTGTACACCTTGGCAGCTGCACCTTTTGCGATGGAGAAAGCCTCGATGTACGGCGAAGCCATACCGAACATCATGGAACCCATCATAACGGAGAAGAAAACCGTGATCATCGTGGCCGGGG	0
TR40149|c0_g2	1.41319	7.71752	16.192	0.00145773	0.0113779	0	0	0	0	0	0	0	0	0	0	0	TTTTCCATTTCCAAAACTATAGGCACCCAGCATGGTTGTAACTGTATACTCTATTAATTTATTCTCTTGTAGTAATCTGATATACAGAGGCTGTGTATGCACTACCAACTGCGCTCAGGTGGTTGTAAAGGTTTTGGAAGAATTTAAAGAAAATTGCCAATGCTGCTACCAACACACGTTAGGAAAACTTATAGCGACATCGATGCTTACTGGCTTTGCTTGATTTTAAACACGGACTAATTCACTTCTTTGCATAATTAACAATTTTGTATTCCATACTTCGGTCCGTGTGTTCTGCTGTGTGGAATGAATGTGTGAGTGAACAGTCAAGTTATTTACTAATGCCCGTAGTCATTATTTCAACAGATACGATGGAAAAAATAGTTTTGTGTATATGCT…	0
TR81487|c0_g2	1.4123	2.87926	27.6662	0.000156469	0.00694482	ESTF_MYZPE^ESTF_MYZPE^Q:611-6,H:26-224^41.95%ID^E:5e-41^RecName: Full=Esterase FE4;^Eukaryota; Metazoa; Ecdysozoa; Arthropoda; Hexapoda; Insecta; Pterygota; Neoptera; Paraneoptera; Hemiptera; Sternorrhyncha; Aphidomorpha; Aphidoidea; Aphididae; Macrosiphini; Myzus	TR81487|c0_g2|m.14728	3-704[-]	ESTF_MYZPE^ESTF_MYZPE^Q:7-233,H:13-224^41.74%ID^E:1e-48^RecName: Full=Esterase FE4;^Eukaryota; Metazoa; Ecdysozoa; Arthropoda; Hexapoda; Insecta; Pterygota; Neoptera; Paraneoptera; Hemiptera; Sternorrhyncha; Aphidomorpha; Aphidoidea; Aphididae; Macrosiphini; Myzus	PF00135.28^COesterase^Carboxylesterase family^32-233^E:7.3e-69	sigP:1^22^0.845^YES	0	0	0	GO:0080030^molecular_function^methyl indole-3-acetate esterase activity	0	GTGAACATGTGGTAGTGCGCGCTGGCGGCGCCCGCCTCGACGCCGAGCAGCGTCACGCTGTGCGGGTTGCCGCCGAACATGGGGCCGTTACGCAGCACCCAGCGCAGCGCCATCGACTGGTCCTTGAGGCCCACGTTGCCAGGCAGCGACATATCCCCAGCCGCCAGGAAGCCCAGCGGGCCGAGCCGATAGTTGAAGGTGACGAGAACGACGTTGTGGTCCATGAGGTGTTCTGGAGAGAACCTGGACAAGCTGCCGCTGCCCGTCGTGAAGCCGCCGTCGTGAATCACCACGATGACGTCCCTCATCACCCTGATGATGTCGTTCACGTCGCCATCATCAGGAACCAGGTGTGTGAAAATGTTGATGTACAGGCAGTCCTCGTTCCCGATGTATTTC…	RVVASALAVSCLLLASASLASAATAAEDTELAPVVNVEQGKVAGSTMLSRRGKRFFAYLGIPYAEPPLWDLRFQVAQKPDNWDDVFNATKEGSPCPQLNAEGKYIGNEDCLYINIFTHLVPDDGDVNDIIRVMRDVIVVIHDGGFTTGSGSLSRFSPEHLMDHNVVLVTFNYRLGPLGFLAAGDMSLPGNVGLKDQSMALRWVLRNGPMFGGNPHSVTLLGVEAGAASAHYHMF
TR47203|c0_g1	1.40919	2.05186	14.1131	0.00241394	0.014228	0	0	0	0	0	0	0	0	0	0	0	AATGGCAATAAAATTATCATGCAAGGAGGAACTATTCAGATGCGAGAAGGTCTGACTTGTTTATAAGAATTTAATTTATCTGCAATTGCATACATGAATTTACAGACACTGAATAATCACATTTTCTAGACCAAGATTTTAATAGCTGACTTGTGAAGAGCAATATTACAATTCAGTCGAGCAAGGGAATTTGTAATGATTAGCTCAACTATTATGTTCTTTCAATCTGAAAATGTTTATAGGAAACTTCTTGTATCCCAGCACGTAGTAATATACACAACACAATAGTATAATATTGATCCTTGAACTAGAAACACTTACGTGCTAAATTTTTAAAATAATGAAGTGACTAGCTTACATTCCCTCACATGAAAACAGGCTCCTGTCATCTTAAAACTA…	0
TR95653|c0_g1	1.40832	0.335067	19.3772	0.000722442	0.00899999	0	TR95653|c0_g1|m.18685	36-341[+]	0	0	0	0	0	0	0	0	CCCAAACACACACACTTTGCAATGCTTAGTATTTAATGACTTCCAAATTGCTATGCACATTCTTATTGTTACATGTTAAAAAGAACAGACAGTCCATATATCACCAGGTCAATGTTTTACAACAAACTGCCCAAATATGTCCTGTAAGAGCAAATATTGGCTATGCATTCCAAACAAAATTCAAGTCTTTTCTTGTAATTGTCTGTTTTCCCTTAACTATTTCTGAACTTTTCAAATTTACCTGCCCTACACTAAGAAACCAAATCATACCAGACAGCAAAATATGGAAGGTGTTACATGCTATCAAGTTTTTGCAAACAGTGAAAGAAGCAATTTATTAACTGTTGAGTGTGGAATAACCTTTGTTGAAAAACAAACATTGTAAGAAGCAGATAAAAA…	MTSKLLCTFLLLHVKKNRQSIYHQVNVLQQTAQICPVRANIGYAFQTKFKSFLVIVCFPLTISELFKFTCPTLRNQIIPDSKIWKVLHAIKFLQTVKEAIY*
TR89638|c0_g1	1.40798	1.11316	20.4946	0.000574624	0.00837384	LPH_RAT^LPH_RAT^Q:741-136,H:1640-1843^46.83%ID^E:5e-48^RecName: Full=Lactase-phlorizin hydrolase;^Eukaryota; Metazoa; Chordata; Craniata; Vertebrata; Euteleostomi; Mammalia; Eutheria; Euarchontoglires; Glires; Rodentia; Myomorpha; Muroidea; Muridae; Murinae; Rattus`LPH_RAT^LPH_RAT^Q:741-139,H:1167-1366^42.36%ID^E:6e-41^RecName: Full=Lactase-phlorizin hydrolase;^Eukaryota; Metazoa; Chordata; Crani…	TR89638|c0_g1|m.16906	121-741[-]	LPH_RAT^LPH_RAT^Q:1-202,H:1640-1843^46.83%ID^E:2e-48^RecName: Full=Lactase-phlorizin hydrolase;^Eukaryota; Metazoa; Chordata; Craniata; Vertebrata; Euteleostomi; Mammalia; Eutheria; Euarchontoglires; Glires; Rodentia; Myomorpha; Muroidea; Muridae; Murinae; Rattus`LPH_RAT^LPH_RAT^Q:1-201,H:1167-1366^42.36%ID^E:2e-41^RecName: Full=Lactase-phlorizin hydrolase;^Eukaryota; Metazoa; Chordata; Craniata;…	PF00232.18^Glyco_hydro_1^Glycosyl hydrolase family 1^17-198^E:3.5e-49	0	0	COG2723^beta-glucosidase	0	GO:0016324^cellular_component^apical plasma membrane`GO:0005903^cellular_component^brush border`GO:0016021^cellular_component^integral component of membrane`GO:0008422^molecular_function^beta-glucosidase activity`GO:0017042^molecular_function^glycosylceramidase activity`GO:0000016^molecular_function^lactase activity`GO:0016740^molecular_function^transferase activity`GO:0005975^biological_process^…	GO:0004553^molecular_function^hydrolase activity, hydrolyzing O-glycosyl compounds`GO:0005975^biological_process^carbohydrate metabolic process	TTTTTTTTAAAATAATGGTACTGCGTCATGTATTTAAACATAGCTCTTTTCTAAACGCAATCGCTCACTTATAAGTTACGGATATTGTTTGTTTATGACTAAGAATATGATTCGCTAATTCTACTGAAAGTACTCATCAGGCACTGTCTTATTTCTGAAGATGTCACCCATGAAGCTTGCAGATGCTTTCGGAATCCTTGCAAGATCAGTACTGTTGAAATCTACCCTGTAGATTCCGAAGCGTAACTCGTATCCAGAAGCCCATTCCAGATTGTCCATAATGCTCCACGCCATGTAACCAAGTACGTTGACACCGTCTTCATTAATAGCTTTCAACAGTTCGGCCAAATAACTCCCATAGTAGTCGATTCGGCGCTGATCATCCAGTTCTCCCCAGTC…	PAVVRQRVDNNSAAEGRPRSRLPSFTEEEKQYIKGSADFIGINTYTTTIVEPGDSGGVPSFELDTGVIRYQNESWPGSSASWLKVVPWGFRKLLNWMSNEYPGYPIVVTENGYGDWGELDDQRRIDYYGSYLAELLKAINEDGVNVLGYMAWSIMDNLEWASGYELRFGIYRVDFNSTDLARIPKASASFMGDIFRNKTVPDEYFQ*
TR94178|c0_g1	1.40792	6.57842	8.17095	0.0134865	0.0397647	CBPA1_ANOGA^CBPA1_ANOGA^Q:2121-2942,H:195-422^45.13%ID^E:7e-70^RecName: Full=Zinc carboxypeptidase A 1;^Eukaryota; Metazoa; Ecdysozoa; Arthropoda; Hexapoda; Insecta; Pterygota; Neoptera; Holometabola; Diptera; Nematocera; Culicoidea; Culicidae; Anophelinae; Anopheles`CBPA1_ANOGA^CBPA1_ANOGA^Q:1541-1978,H:29-176^33.56%ID^E:7e-19^RecName: Full=Zinc carboxypeptidase A 1;^Eukaryota; Metazoa; Ecdysozo…	TR94178|c0_g1|m.18374	1932-2981[+]	CBPA1_ANOGA^CBPA1_ANOGA^Q:64-337,H:195-422^45.13%ID^E:1e-75^RecName: Full=Zinc carboxypeptidase A 1;^Eukaryota; Metazoa; Ecdysozoa; Arthropoda; Hexapoda; Insecta; Pterygota; Neoptera; Holometabola; Diptera; Nematocera; Culicoidea; Culicidae; Anophelinae; Anopheles	PF00246.24^Peptidase_M14^Zinc carboxypeptidase^65-127^E:1.2e-17`PF00246.24^Peptidase_M14^Zinc carboxypeptidase^128-194^E:3.8e-22`PF00246.24^Peptidase_M14^Zinc carboxypeptidase^194-329^E:9.6e-28	0	0	COG2866^metallocarboxypeptidase activity	KEGG:aga:AgaP_AGAP009593	GO:0005615^cellular_component^extracellular space`GO:0004181^molecular_function^metallocarboxypeptidase activity`GO:0008270^molecular_function^zinc ion binding`GO:0007586^biological_process^digestion`GO:0006508^biological_process^proteolysis	GO:0004181^molecular_function^metallocarboxypeptidase activity`GO:0008270^molecular_function^zinc ion binding`GO:0006508^biological_process^proteolysis	GATCACACGGAGGATGGAATGACGTGCCGTGGTCTTCAGCGATGAAGATGATTTGGTTTCCAAAATTTTTTAGTCTGCACTTGACTGCTTGGGTTGGCTGGTTCTCGCAAAGGAAAGCGGCGAGGGCATAGAATCGGCTGCAAAACCGTGACTAATATAGTTAGCATAACGCTGAGCTTCATGTAAATTGATAAGTAAATAGTAAAGACATGATACAGTACAAATCAGTTCTGGGAGGAAAAAAGGAGTATTTTATAAAAAATCTACTTTGTCTACTAATGAAGAGAAACGTTTGTTGTAGAGCTGCATACATAACGCAAATAAAAACGGGAAGAAACTAACAGGTACTGGATAGTACTCTCAGAACTGTCACACATTTAAAACCTTAGCTTAAATACT…	MRAEKSAESKFPTAPALRGPRNTRSQNFLRHRQPRSRHRGRHPREGVDQPCQRDMVHQRDPHAASVTWFINEILTSTDASVRSIVESFDFYIFPNTNPDGYVYTWTDNRMWRKTRKPYNLCVGADPNSTNPDGYEYTWTDNRMWRKTRKPYLLCVGADPNRNWDFHWAEEGASSISCSEAFAGSEAFSEVETKTETYAGSEAFSEVETKTLSEFLTGLGSDLQVYLSFHSYSQLLMYPYGVSSVVADNAAELQQIVEKAAQVLATRYGTQYTVGSIVDAIYPAAGTSIDWSMGALGLRYSFVWELRDTGLYGFILPADQIIPTSEETFDSVLSVLEDVLAASRSKKQLH*
TR55871|c0_g1	1.40362	0.970091	19.8552	0.000654381	0.00872399	KLKB1_MOUSE^KLKB1_MOUSE^Q:190-29,H:389-441^53.7%ID^E:1e-10^RecName: Full=Plasma kallikrein;^Eukaryota; Metazoa; Chordata; Craniata; Vertebrata; Euteleostomi; Mammalia; Eutheria; Euarchontoglires; Glires; Rodentia; Myomorpha; Muroidea; Muridae; Murinae; Mus; Mus	0	0	0	0	0	0	COG5640^protease	KEGG:mmu:16621`KO:K01324	GO:0005615^cellular_component^extracellular space`GO:0004252^molecular_function^serine-type endopeptidase activity`GO:0007596^biological_process^blood coagulation`GO:0042730^biological_process^fibrinolysis`GO:0006954^biological_process^inflammatory response`GO:0031639^biological_process^plasminogen activation`GO:0051919^biological_process^positive regulation of fibrinolysis	0	GGTCGTTCTCTCCAGCCACAGCGACGTAGTATCCAACGCCTTGATAACAGTGTCCTGCGGTAAGGATGGCAGTGGTAGAGATGATGGAGCCGCCACAGTTGTGTACCCGGTAAATGAGCAGGACGTACTGCAGAGACACTTGATATGGAATCTCACCTCTGGCGGCGTCGTGTCCCCCGAAGATGCGCCCCCTGGAGACAGCGAAGCCCCGAGCGGGTCCAGTGTGGGGTAGACGACGCACTGGCAGCGTC	0
TR51939|c0_g1	1.39984	2.22004	12.8836	0.00331976	0.0166894	0	TR51939|c0_g1|m.6815	180-494[-]	0	0	0	0	0	0	0	0	TCACCAAACCAGAAAACAGTAAATTCAATAAATATAATAAGTTTCAAATATTACTTACATTATAAGGCTGCAACAGTATTATCCATAATAATCCATGCAATTGTGATTGTATTATTGCCTTAACATAAGTGAATGACAACAGAAATGCATAATTATGTATCATAAAATTTCCTGATAGATTAAAACTGTGTGCCACATTGGTACGTGAATAAGAAACCTTTCCTTTTGTGGGCAATGCTTTTGCCAAATAAACTACTCAGGCATGACTCACAGATTTCATTCTGCCAGTATCTCTCTCCTGTCTTCCTAGTGTGGAACACTGTTTTAATCTGGCAATAAAATTCAAAAGAGAGCACACTCTGCTGCAGACTGATAGGTTTCTCCAGGTCTTCTGTGCAA…	VQTVCATYFSRVNYDREEECVDHYTINFYVQHCTEDLEKPISLQQSVLSFEFYCQIKTVFHTRKTGERYWQNEICESCLSSLFGKSIAHKRKGFLFTYQCGTQF*
TR97942|c0_g2	1.39839	1.29285	11.4229	0.00495811	0.0210346	0	0	0	0	0	0	0	0	0	0	0	GTAACTTTAAGTTCTGCACCCAATGGACAAGTGAGACCTGAAACAAAAAAAAGATTTACTATTTTTAAATTGCCTCACAAAATAATGAATTTTGGTGTAGACACCCTGTATTAATTTTTCCTTTGTCTTTTTTCTTAATAGTATAATCAGACACTCCACAGAAAAGTGCACTTTGACGCATGCAATCTGTCGCAGCTTCTACGTATGTACTGAAGAAATCCTCCCGTAGATTCTGTTGAAATGTAGTTACAGGCATAGACGTGACAGAATTCTGATGAAGACTGTGATGTGCAGTGGAGAATAAGATGTGTCCATTAGCTTGAAATAGGAAAGGGCCTCAAAATACCGTAAATAAACTTCCAAACTTCTTTCTATCCTTAAAACAATGTAATATTAAGA…	0
TR72951|c1_g1	1.3972	6.60878	106.39	1.30554e-07	0.00224281	0	TR72951|c1_g1|m.12699	2-724[+]	0	0	0	0	0	0	0	0	AGTCAATGATTCATTCGACAACACCCTGCTAGTGCTGGCCACAGCCTACCGCAACTTCTCTTCTGCTGTCAAGGGTGGCTTGAGATCCACGAAACACTTCAATTCACAAGGAAGAGTACATGGGACACATTTGGAGACCTACAGCCTCAACATGAAGACCACGTTTGCTGTTGTCATCGCAGCCACCTGTCTTGCCGTCTCCCCAGGGGACGCAGCTTCAATGGAGGGAGCTTTCGTGAATGCGAGAGTACATGGGACACATTTGGAGACCTACAGCCTCAACATGAAGACCACGTTTGCTGTTGTCGTTGCAGCCGTCTGCCTTACCGTCTCCCTGGGGGACGCAGCTTCAACGGAGGGAGCTTTCGTGAATGCGACACGGGTCATCCCAGCTCCCAG…	VNDSFDNTLLVLATAYRNFSSAVKGGLRSTKHFNSQGRVHGTHLETYSLNMKTTFAVVIAATCLAVSPGDAASMEGAFVNARVHGTHLETYSLNMKTTFAVVVAAVCLTVSLGDAASTEGAFVNATRVIPAPSISYYSEDHVCCCRCSRLPYRLPRGCNLTGGSFREFDKDHPCSQHIILLCEWYSHEGDDDSRCLFLPCQHDGRNRLPDRKFSPGDLQADSQRAGGHRIHCYQHPEWSQ*
TR98141|c0_g1	1.39703	1.84561	14.24	0.00233795	0.0140133	EST6_APIME^EST6_APIME^Q:925-200,H:302-550^28.52%ID^E:3e-17^RecName: Full=Venom carboxylesterase-6;^Eukaryota; Metazoa; Ecdysozoa; Arthropoda; Hexapoda; Insecta; Pterygota; Neoptera; Holometabola; Hymenoptera; Apocrita; Aculeata; Apoidea; Apidae; Apis	TR98141|c0_g1|m.19227	194-931[-]	EST6_APIME^EST6_APIME^Q:3-244,H:302-550^28.52%ID^E:2e-17^RecName: Full=Venom carboxylesterase-6;^Eukaryota; Metazoa; Ecdysozoa; Arthropoda; Hexapoda; Insecta; Pterygota; Neoptera; Holometabola; Hymenoptera; Apocrita; Aculeata; Apoidea; Apidae; Apis	PF00135.28^COesterase^Carboxylesterase family^7-239^E:3.5e-31	0	0	COG2272^Carboxylesterase	KEGG:ame:410928	GO:0005576^cellular_component^extracellular region`GO:0080030^molecular_function^methyl indole-3-acetate esterase activity	0	AACTAGTGATAAAACTGTATCTTGTATTTTCAACATAAAAAGGTAACATAAAACATCAGTACACAATCCAGTATTTGTGTAGCAACTGTACCAGCATTTAACTTATGAATTCCGCAGTTCTTAGACGTCTTGTAGTAATTTTACGACACACTGTAATCAGAAGTTCGTCCTCCTTCGCCAGCCGAACGCAGTTTCACATGGGGATGTTCTCGTGCCAGAAGTCCATCCGCTCCTTATCCTTGTTCTGCTCCAGACTGTACTCTTCAGTGATGTGCAGAAAGTTTGGCGACGACACGCTGAATGGCTCCCACCTCACACTGTCATTTCCAGCATTTGGATCCCCAAACTTTATGAAGTTGCTCCATGTGTCAACCATCCTCTGTCTCAAAGCACCCTCCA…	LGFAPVVEPDVEGAIVTEHPIKVLKEGRFNKVPVITGVTSGEGLLFVTNEGLLADPAELQNFNDKFEVATAPHVHLPTAEERIDATRKIHDFYFGDGDITLDDAQGLVDLGTDQHFAEPTDSLVRYVSQLSDQPVYYYLFDYRGASGGNTTYGTPHAAETKFLFLNTASTVEWDPNTLEGALRQRMVDTWSNFIKFGDPNAGNDSVRWEPFSVSSPNFLHITEEYSLEQNKDKERMDFWHENIPM*
TR47883|c0_g1	1.39655	1.5618	17.3792	0.00111187	0.0102997	MOT12_HUMAN^MOT12_HUMAN^Q:30-434,H:19-148^33.82%ID^E:4e-12^RecName: Full=Monocarboxylate transporter 12 {ECO:0000305};^Eukaryota; Metazoa; Chordata; Craniata; Vertebrata; Euteleostomi; Mammalia; Eutheria; Euarchontoglires; Primates; Haplorrhini; Catarrhini; Hominidae; Homo	TR47883|c0_g1|m.5801	78-434[+]	MOT7_MOUSE^MOT7_MOUSE^Q:14-119,H:103-208^31.13%ID^E:2e-12^RecName: Full=Monocarboxylate transporter 7;^Eukaryota; Metazoa; Chordata; Craniata; Vertebrata; Euteleostomi; Mammalia; Eutheria; Euarchontoglires; Glires; Rodentia; Myomorpha; Muroidea; Muridae; Murinae; Mus; Mus	0	0	ExpAA=67.09^PredHel=3^Topology=i21-43o58-80i92-114o	COG0477^major facilitator Superfamily	KEGG:mmu:104681`KO:K08183	GO:0005887^cellular_component^integral component of plasma membrane`GO:0008028^molecular_function^monocarboxylic acid transmembrane transporter activity`GO:0015293^molecular_function^symporter activity`GO:0015718^biological_process^monocarboxylic acid transport	0	GAGCGCAGCCGAACGCGAGAGGAACCCGACTCCGCAGGTCGACGCACGCACAGTAGCGAGCAACAGATGCGGCAGAGATGACGGCATCATCGACGCCTCAGTACGAGCTGGTGCCCCCTGACGGCGGCTGGGGCTGGATCGTCGTTCTGGGAGTCTTTCTCAGTCACATGACATGCCAGTCGCTGATTTCCGTCTTCAGCCTTCTGTTCGGAGACAAGCTGACGTCCATGGGCCACGAGACGACGAGTGCAGCGCTCATCATGAACATCATGAGCGCCGTTACCAACTTCTCAGGACTCTTCACGGGCCCATTGCTCAAGAAGTACACGATGCGTCAGGTGGCCATTGCTGGCGGAATCTTGGTGTCTGCGGGGCTCATCCTCACCAGCTTCGCGAATT…	MTASSTPQYELVPPDGGWGWIVVLGVFLSHMTCQSLISVFSLLFGDKLTSMGHETTSAALIMNIMSAVTNFSGLFTGPLLKKYTMRQVAIAGGILVSAGLILTSFANSLWHMIVTYSII
TR82331|c2_g4	1.39417	0.379687	33.0111	6.87664e-05	0.00694482	0	0	0	0	0	0	0	0	0	0	0	GCAGTCTTGACAAACTTTTTAATTTTGTAAACAAATGTGATGCCAACGGCCTTGCCGCAGTGGTAACACTGGTTCCCTTCAGATCATCGAAGACAAGCGCTGTCGGGCTTGGCTAGCACTTGGATGGGTCACCATCATGGTCTGCGAAGTGCTGTTGGAAAGCGGGGTGCACTCAGCCCTTGTGAGGCAAACTGAGGAGCTACTTGATTGAGAAGTAGCGGCTCCGGTCTCGTAAACTGACATACGGCCGGGAGAGCGGTGTGCTGACCACATGCCCCTCCATATCCGCATCCAATGACGGCGATGGGC	0
TR60639|c0_g1	1.3847	4.02275	12.7371	0.00345205	0.0170361	PTGR1_PIG^PTGR1_PIG^Q:538-242,H:4-98^41.41%ID^E:7e-20^RecName: Full=Prostaglandin reductase 1;^Eukaryota; Metazoa; Chordata; Craniata; Vertebrata; Euteleostomi; Mammalia; Eutheria; Laurasiatheria; Cetartiodactyla; Suina; Suidae; Sus	TR60639|c0_g1|m.9728	2-538[-]	PTGR1_PIG^PTGR1_PIG^Q:1-139,H:4-130^37.41%ID^E:2e-20^RecName: Full=Prostaglandin reductase 1;^Eukaryota; Metazoa; Chordata; Craniata; Vertebrata; Euteleostomi; Mammalia; Eutheria; Laurasiatheria; Cetartiodactyla; Suina; Suidae; Sus	PF16884.5^ADH_N_2^N-terminal domain of oxidoreductase^2-99^E:3.1e-28	0	0	0	KEGG:ssc:397678`KO:K13948	GO:0005829^cellular_component^cytosol`GO:0036185^molecular_function^13-lipoxin reductase activity`GO:0036132^molecular_function^13-prostaglandin reductase activity`GO:0047522^molecular_function^15-oxoprostaglandin 13-oxidase activity`GO:0032440^molecular_function^2-alkenal reductase [NAD(P)] activity`GO:0097257^molecular_function^leukotriene B4 12-hydroxy dehydrogenase activity	0	AGGGACAGGGATAACGGCAAATCCCCCAGGTCTGGCACCAGCATGGGGGGCGACATGACATCAGGGGGCGGCACTTCAGGCCCAACATCAGCCACTGTGCGGTCGCGCCACCCCCAGTAGGCCACCACGTGCCGCCCCACTGGGAAACCTGCAGCAGGGACAGGGATAACGGCAAATCCCCCAGGTCTGGCACCAGCATGGGCGGCGACAGGACGACTGGGTGCGGCACGTCGGGCCCCACATCAGCCACTGTGCGGTCGCGCCACCCCCAGTAGGCCACGATGTGTCGCCCCACTGGGAAACCTGCAGCCCGGCTCTCCACGATTCGTGCTACCTGGGCCGCGATCATAGTGTCTCCCACTTTATGTCCGTATTTCTCCACGCCTGCGAGAACCCTCT…	ARKIVLARSFQGEPRPEDFRVEEEELPPLKDGQILAEAVYFSVDPFQRVLAGVEKYGHKVGDTMIAAQVARIVESRAAGFPVGRHIVAYWGWRDRTVADVGPDVPHPVVLSPPMLVPDLGDLPLSLSLLQVSQWGGTWWPTGGGATAQWLMLGLKCRPLMSCRPPCWCQTWGICRYPCP
TR95666|c0_g1	1.38437	2.50325	11.9707	0.00425253	0.0192655	0	0	0	0	0	0	0	0	0	0	0	CCAGATTAAAGATAATATCCTTTATTTGATGCTAATAACGTTTGACACACACCGTAAAGGCATAGTTTATACAACTTTATAGAACTTTGACAACCATGAGTGTATGTGGTAAGTGATTACTTTGCAACCTGCTTTACATGAATGCATATAGAATGGGAGAACTTGATCAGACGCCAGCGGCAGCCGTGATCCAAGAACGGAGGTTGCCGACGTTAGCGTAGACGCCGCCTTGGGCCTCGCATGGTGAGTATGTCCAGGAGACGATGCCGACCTGAG	0
TR56550|c0_g8	1.38281	5.89851	13.6999	0.00268191	0.014975	0	0	0	0	0	0	0	0	0	0	0	GAGATTCTCGCCATCTTGCCACTGGACGAACTCCGGGCTCTGTTCGACGAGAAGCTGGAAACCAGCCCCGACTTCAAGGAGCTGTACGACAGGATCAGGTCTCCCGAATTCCAGGTGAGTCATGATGTCTTGATCAGTAGTTATGTGACCTATTTGGAGGATACTTAGTACTTGAAGGTTATTTGGGCTTTTTATCTGTTGTAGTCGATCGTGGAAACTCTGAACTCGCTGCCAGAGTACCAGGAGCTGCTCCAGAAACTGAGGGACGCTGGCATCGACGTCGACGCATTCATGAACTCCGGGCTCTGTTCGACGAGAAGCTGGAAACCAGCCCCGACTTCAAGGAGCTGTACGACAGGATCAGGTCTCCCGAATTCCAGGTGATTCGTCATGTCTTGA…	0
TR35933|c0_g1	1.38167	0.92406	14.1206	0.00240938	0.0142239	0	0	0	0	0	0	0	0	0	0	0	TTTTTTTCAGTGTAGAAGAAATTTTTTTATTGACGAAAACAATTATGTAATACTGGTTACCAAAGTGCTTCAGTACTGTTAATTAATATCATATATATAACCAGTTTCTCCTGAGACTCGTGTGTTGTTTCAAAATGAGAAATTAGACATAGATATTCCAAATATTTAGCAGGGATGTATTTACAGTTTTAAAATTACTGGAAATATTCTTCTGGTACACTCATGTTCCTGTAAATATTAGCAAGGAAGCTTGTTGATGCCTTGGGCGTCCTCGTCCGCTCAGTGCTG	0
TR56571|c0_g1	1.37956	11.6381	28.1116	0.000145501	0.00694482	PE1_ANOGA^PE1_ANOGA^Q:422-874,H:32-147^29.22%ID^E:4e-09^RecName: Full=Peritrophin-1;^Eukaryota; Metazoa; Ecdysozoa; Arthropoda; Hexapoda; Insecta; Pterygota; Neoptera; Holometabola; Diptera; Nematocera; Culicoidea; Culicidae; Anophelinae; Anopheles`PE1_ANOGA^PE1_ANOGA^Q:2741-3154,H:32-145^29.5%ID^E:7e-09^RecName: Full=Peritrophin-1;^Eukaryota; Metazoa; Ecdysozoa; Arthropoda; Hexapoda; Insecta; Pt…	TR56571|c0_g1|m.8316	2033-3475[+]	PE1_ANOGA^PE1_ANOGA^Q:237-380,H:32-151^31.03%ID^E:4e-13^RecName: Full=Peritrophin-1;^Eukaryota; Metazoa; Ecdysozoa; Arthropoda; Hexapoda; Insecta; Pterygota; Neoptera; Holometabola; Diptera; Nematocera; Culicoidea; Culicidae; Anophelinae; Anopheles`PE1_ANOGA^PE1_ANOGA^Q:334-478,H:32-151^29.45%ID^E:9e-12^RecName: Full=Peritrophin-1;^Eukaryota; Metazoa; Ecdysozoa; Arthropoda; Hexapoda; Insecta; Pte…	PF01607.24^CBM_14^Chitin binding Peritrophin-A domain^83-114^E:5.7e-06`PF01607.24^CBM_14^Chitin binding Peritrophin-A domain^193-226^E:1.7e-05`PF01607.24^CBM_14^Chitin binding Peritrophin-A domain^238-283^E:1.3e-10`PF01607.24^CBM_14^Chitin binding Peritrophin-A domain^335-380^E:4e-10`PF01607.24^CBM_14^Chitin binding Peritrophin-A domain^434-478^E:8.7e-09	0	0	0	KEGG:aga:AgaP_AGAP006795	GO:0005576^cellular_component^extracellular region`GO:0008061^molecular_function^chitin binding`GO:0006030^biological_process^chitin metabolic process	GO:0008061^molecular_function^chitin binding`GO:0006030^biological_process^chitin metabolic process`GO:0005576^cellular_component^extracellular region	ACCTTTTGCGGACAGTAACCTGACTTGAGCAAACATGAGAGGATTTCCACTACTTGTGACCGTCGTGTTAGCGGCCTTGGTTGGAAGCAGCGTTGCAGCTTCCATCCGAAAGGTGACTGTGATGAGTGCAACTTGCAAGGGAGCTTCTGGGCCATTTCCGAACCCAGACAGCTGCAGAAGCTTCCTACAGTGTGAGCCATCAGGCGTTGCAACGGTCATCCCATGCCCAGCAAACCTCGAGTTCAATCCAAAGCTGAGGGTGTGTGACTTTCCAGAGAGAGCTGGTTGCTCCTCATCACCGTCTCCACCAGCTGACGACGACAATGGAAACGGTGGAGGATCAGATGATAACGGAGGCGCTTCACAAGCTCCACCAACTGGCGACGCCCCCACCTGTCC…	MPCPGGLEYNSKLRVCDYPESAGCSSSAAPSYPSGDDSSNGGQDNGNAGSGNGESPQQPAGDAPTCPAWNPDDVTQLPNPSDCNSGVARLIPCPAGLEYNAQLRVCDYPENAGCSTPTSPNNPSDDTPSEGEQDDGNSEGGSDINPQPPTGDAPSCPAWNPEDVTQLPNPSDCNSFYKCDETCPAWNPDDVTQLPNPKDCSSFYKCDENGVAWLIPCPDGLEYNAEPCPAWNPDDVTQLPNPKDCSSFYKCDENGVAWLIPCPAGLEYNAELRVCDYPENAGCSTSSSPSNPSDDTPSEGEQDDGNSEGGSDINPQPPTGDAPNCPAWNPEDVTQLPNPSDCSSFYKCDENGVAWLIPCPAGLEYNAKLRVCDYPESAGCSSSSAAPSNPSGVESSDSD…
TR56550|c0_g10	1.37945	8.23466	13.6753	0.00269889	0.0150051	G12_ANOGA^G12_ANOGA^Q:1-201,H:143-209^31.34%ID^E:2e-07^RecName: Full=Protein G12;^Eukaryota; Metazoa; Ecdysozoa; Arthropoda; Hexapoda; Insecta; Pterygota; Neoptera; Holometabola; Diptera; Nematocera; Culicoidea; Culicidae; Anophelinae; Anopheles	0	0	0	0	0	0	ENOG410Y27Q^protein G12 precursor	KEGG:aga:AgaP_AGAP006187	0	0	GAACTCCGGGCTCTGTTCGACGAGAAGCTGGAAACCAGCCCCGACTTCAAGGAGCTGTACGACAGGATCAGGTCTCCCGAATTCCAGTCGATCGTGGAAACTCTGAACTCGCTGCCAGAGTACCAGGAGCTGCTCCAGAAACTGAGGGACGCTGGCATCGACGTCGACGCATTCATTGACCTGATTCGTGGTCTTTTCGGCCTGCCTACCAGGAAATTTTAAACAAGAATTTTTAGCACGTAAATACAACGTGTTATTGCCTGTGGTGTGCATTATGGGAAGACTGAAGTGTTGTTTTCGAACTATGAGCACGTGAATAAATTATTTTCCAGCGTAAAAAAAAAAAAAAAAAAAAAAA	0
TR63539|c0_g1	1.37935	3.79258	14.8537	0.00200747	0.0130376	0	TR63539|c0_g1|m.10208	3-656[+]	0	0	sigP:1^38^0.701^YES	ExpAA=19.24^PredHel=1^Topology=i21-40o	0	0	0	0	GTCACAAGATCAGCACATCGGTAACTATTACGGCAAGACCACTGCACACTTGTAAAATGAGAGCGGCTGCGGTTGCGGTGGCGCTGCTGTTGCTGCAGGTGGCGGCGGTCGCAGCAGCACCCAGGAACGCCGGCTGCCTGTCCTCCGGAGATCCTCGCTGTTGGCGCTCACACACAGGTACCGATGAGCAGCATCACGCTCTTGGGACACCAGACACTCAGAAATCGTCGCTTACTCAGTCAAAGGTTGAGAATGACAACTCATGGCTGCATTCTGAACAAGAGGATGCTGAACATGGAAGAAGTGAGCAACACTCAGTACAAAATGTAAAGAAGAAACCTTTATATGGTTGGTCTAGTCTCATAAAAGCCATAATTCAAGAGAAAGAAAACAGAAGCA…	HKISTSVTITARPLHTCKMRAAAVAVALLLLQVAAVAAAPRNAGCLSSGDPRCWRSHTGTDEQHHALGTPDTQKSSLTQSKVENDNSWLHSEQEDAEHGRSEQHSVQNVKKKPLYGWSSLIKAIIQEKENRSRSEEDDSSDSSSNDSNDSSGSDNENSSGDNSDSNESDGDDSNSSSSHEENTSGNNSGSNDSDEDDSSNDDENTSGNNSGNNENDED
TR75035|c1_g1	1.37864	8.59379	20.6227	0.00056003	0.00831417	M1I1L_DANRE^M1I1L_DANRE^Q:177-749,H:7-161^22.28%ID^E:2e-08^RecName: Full=Mid1-interacting protein 1-like {ECO:0000312|ZFIN:ZDB-GENE-030131-1697};^Eukaryota; Metazoa; Chordata; Craniata; Vertebrata; Euteleostomi; Actinopterygii; Neopterygii; Teleostei; Ostariophysi; Cypriniformes; Cyprinidae; Danio	TR75035|c1_g1|m.13244	84-755[+]	M1I1L_DANRE^M1I1L_DANRE^Q:32-222,H:7-161^22.28%ID^E:9e-10^RecName: Full=Mid1-interacting protein 1-like {ECO:0000312|ZFIN:ZDB-GENE-030131-1697};^Eukaryota; Metazoa; Chordata; Craniata; Vertebrata; Euteleostomi; Actinopterygii; Neopterygii; Teleostei; Ostariophysi; Cypriniformes; Cyprinidae; Danio	PF07084.12^Spot_14^Thyroid hormone-inducible hepatic protein Spot 14^37-221^E:1.2e-28	0	0	ENOG4111NGS^Mid1 interacting protein 1	KEGG:dre:322977	GO:0005829^cellular_component^cytosol`GO:0005874^cellular_component^microtubule`GO:0005634^cellular_component^nucleus`GO:0046890^biological_process^regulation of lipid biosynthetic process	0	GTACATGGGGAGACCATTTGCAGTGGGTTACGTGAGTGCTTGTGTTCGCGTGTAAATTTATATTCCAAGCTTCGTTTGCTGGAATGTTATTGAGTGATTCTTTGACATCGTGCTGTGATACAATTTCTTTACCAATGGATAACCGAAGCTGCCTTAGAAGGATTGGACGCCACGAAGACGCTCCATTTTCCAATCAGAGCATAATGAACGTGATAGAAAAATTTGTTAAAGCCGTCGGAGAGATGGAAGAGACGATCTTAGTTCCCTGCAGACTAATGGATCTGAAAGTTGGTGATGCTGGAGATACTGTGGAAGTAGACACCAAAAAACATCAAAAGGGCAAGAGGAGTATCCGCGATATGGCGAACACCGATCTTTACAATCTCTACACTACAGTTA…	MLLSDSLTSCCDTISLPMDNRSCLRRIGRHEDAPFSNQSIMNVIEKFVKAVGEMEETILVPCRLMDLKVGDAGDTVEVDTKKHQKGKRSIRDMANTDLYNLYTTVNSVKRELLWGQSEDVPDQGMITVPSSTSVSSATKGHARRPSTASMTSTNSSNSISDTDSENGNENDSGIEDSQAADVSQEVAANFRRHLHGLYRSLEQMTEAANYLTTRYQNDVGGAV*
TR85397|c0_g2	1.3775	2.06072	14.5582	0.00215933	0.0135096	0	TR85397|c0_g2|m.15866	87-527[+]	0	0	0	0	0	0	0	0	GGTGTTTGAGAGTCAGGAGACAGAACAGTAGCCGAAGTTGACGTTTGGAAGATAACGGGAGGGAGTACGCGCAGTGTAAGAACCGCATGGGTTTGGCGCGTGGCAGAGGTAGAGGAAAAGGCAGAGGCGGTGTTGTGAAACCGAAAAGTCGTGGGATTGCTGTGAAACCACCACCGTTGCTTGGGCGTCCTGCTCCTCCCCCGCCGATGGCGTTGCGTCCGCGAGGTTTGCCGGTTCCGCCGTTGCTCCCACGAATGAGACCTCCCCCTCCCGGATTGAGGCCTTCCCGGGGTATGCCAACTGCACCACTACCAATGTTAGGTCCTGGGAGACCAATCCATCCCCCCTTCCATCCAATACCTCCGCACCATGTTATGTTGATAAAATCATGGCAGAGGT…	MGLARGRGRGKGRGGVVKPKSRGIAVKPPPLLGRPAPPPPMALRPRGLPVPPLLPRMRPPPPGLRPSRGMPTAPLPMLGPGRPIHPPFHPIPPHHVMLIKSWQRSTVKKRSERAADVISPESGNTPSLIFVYHISVVNCDFVCECL*
TR82403|c2_g6	1.37643	2.89979	13.2764	0.00299306	0.0158015	COGS_HYPLI^COGS_HYPLI^Q:281-174,H:223-258^58.33%ID^E:6e-07^RecName: Full=Collagenase;^Eukaryota; Metazoa; Ecdysozoa; Arthropoda; Hexapoda; Insecta; Pterygota; Neoptera; Holometabola; Diptera; Brachycera; Muscomorpha; Oestroidea; Oestridae; Hypodermatinae; Hypoderma	0	0	0	0	0	0	0	KEGG:ag:CAA52359`KO:K20752	GO:0005576^cellular_component^extracellular region`GO:0004252^molecular_function^serine-type endopeptidase activity`GO:0030574^biological_process^collagen catabolic process	0	CCACATGTACTGTGTGTGTAATTGACACATTCGTAAATTAACGAGCAATAAGTCACTAAATAAGACACTTCATATACTGAATTATTTATTTGGGGTTCTGTATTGTTCACAGATTCTTCTCTCGAGGAATTTGGAAATAGCCGGTGATGAATGTGCTGCATTTACGGAATGGTGATGCCGGCGGTACTTGAGATCCAGTCGAGGAAGTAGGTGACCCTGGTGAAGCCGGCCGGGTCTCCGCTCGAACAGCCCTTGCCCGAAATCCAGCTGACGACGGCGATCTGCGTGTAGCTTCCCTGTGAGCCGA	0
TR46383|c0_g1	1.37622	4.32957	12.2791	0.00390689	0.0182702	PTGR1_RAT^PTGR1_RAT^Q:890-513,H:202-328^44.88%ID^E:6e-30^RecName: Full=Prostaglandin reductase 1;^Eukaryota; Metazoa; Chordata; Craniata; Vertebrata; Euteleostomi; Mammalia; Eutheria; Euarchontoglires; Glires; Rodentia; Myomorpha; Muroidea; Muridae; Murinae; Rattus	TR46383|c0_g1|m.5558	507-899[-]	PTGR1_RAT^PTGR1_RAT^Q:4-129,H:202-328^44.88%ID^E:5e-32^RecName: Full=Prostaglandin reductase 1;^Eukaryota; Metazoa; Chordata; Craniata; Vertebrata; Euteleostomi; Mammalia; Eutheria; Euarchontoglires; Glires; Rodentia; Myomorpha; Muroidea; Muridae; Murinae; Rattus	PF00107.26^ADH_zinc_N^Zinc-binding dehydrogenase^4-83^E:8.7e-08`PF13602.6^ADH_zinc_N_2^Zinc-binding dehydrogenase^6-128^E:7.9e-10	0	0	COG2130^alcohol dehydrogenase	KEGG:rno:192227`KO:K13948	GO:0005737^cellular_component^cytoplasm`GO:0036132^molecular_function^13-prostaglandin reductase activity`GO:0047522^molecular_function^15-oxoprostaglandin 13-oxidase activity`GO:0032440^molecular_function^2-alkenal reductase [NAD(P)] activity`GO:0097327^biological_process^response to antineoplastic agent	GO:0055114^biological_process^oxidation-reduction process	GAAAATATGTGGAAGAAACAATTTGTCTGATGTGAATTTGTCTAATGGTCAAAGTGCCCTGGTGTCTAATTTAAAACTGACTTTGAGAAAAAGAAAGAAACAACACATTTTCACAGCACAGCTTTTCCTTTCCCGCAGCCAGTTTTAAGAAAACAAATGTACATTGTTGTTTAAAAATATATATATCCTATGTGTGACCGAATGCTACCAGAACATTGCGTAAAAATTAGAAATAAAACTGTCAAGAACTTTTCGAGGTATTTGCGAACAATGTTTCTGTTTACATGTTGTATACTCGTATATATTTATTCAACATAGATATCAAAAACATATAATCCATGTCTGTCCAAACATTTATTAGAGATTAGCGTAAAAATTTGAAATAAATCAGTCAAGAAC…	VSTALKQAAPDGVDVYFDNVAGDMSTKVMSHMRYRGRITVIGAISQYNESQSQKLVTLPFTFLANQLRIEACSYTRWHDRWDEGITQLQQWVKEGKLKYRETVSHGFANTPKAFIGMLRGENFGKAVVKL*
TR89552|c0_g1	1.37502	5.91583	16.1426	0.00147464	0.0114193	GPAT3_DANRE^GPAT3_DANRE^Q:893-1663,H:179-436^64.34%ID^E:1e-114^RecName: Full=Glycerol-3-phosphate acyltransferase 3 {ECO:0000250|UniProtKB:Q53EU6};^Eukaryota; Metazoa; Chordata; Craniata; Vertebrata; Euteleostomi; Actinopterygii; Neopterygii; Teleostei; Ostariophysi; Cypriniformes; Cyprinidae; Danio`GPAT3_DANRE^GPAT3_DANRE^Q:609-881,H:170-260^38.46%ID^E:3e-14^RecName: Full=Glycerol-3-phosphate ac…	TR89552|c0_g1|m.16828	890-1675[+]	GPAT3_DANRE^GPAT3_DANRE^Q:2-258,H:179-436^64.34%ID^E:3e-125^RecName: Full=Glycerol-3-phosphate acyltransferase 3 {ECO:0000250|UniProtKB:Q53EU6};^Eukaryota; Metazoa; Chordata; Craniata; Vertebrata; Euteleostomi; Actinopterygii; Neopterygii; Teleostei; Ostariophysi; Cypriniformes; Cyprinidae; Danio	PF01553.21^Acyltransferase^Acyltransferase^42-162^E:6e-20	0	0	COG0204^Acyltransferase	KEGG:dre:436958`KO:K13506	GO:0005783^cellular_component^endoplasmic reticulum`GO:0005789^cellular_component^endoplasmic reticulum membrane`GO:0016021^cellular_component^integral component of membrane`GO:0003841^molecular_function^1-acylglycerol-3-phosphate O-acyltransferase activity`GO:0004366^molecular_function^glycerol-3-phosphate O-acyltransferase activity`GO:0102420^molecular_function^sn-1-glycerol-3-phosphate C16:0-D…	GO:0016746^molecular_function^transferase activity, transferring acyl groups	TCATCAGTTGCGGTCTAGCGCTGGTTTGGGGAAGTTGTGTGTGACCGAATGTAGTTAAATCTAAACTGTCAAGTATACAAGGGACAATTTATTAATTAAAAGATGGTGGCAACTATGTGGACAGTCGTATCGTTCTCTTTTTCTCTTCTTATAACCCCATTTCTGATGGTTCTATTAGGAATAATATTTCTGGCCTCAATCGGAAAATCTCTTGGAGTTAGAAGACTTTACGTCAATCTGTTGTTGAAGATTTTTGAGCTTTCAGAGCATCCAGGTTTCACTAGCATAATGTGCAGCAGTCCGAAAACGAATTTTAAGAACACACTTACTTATTTTGAGTATGGACGTCAACACATCATCAGTTGCGGTCTAGCGCTGGTTTGGGGAAGTTGTGTGTGA…	MWLTACTAVVGYVPEGPFKRWLNHRVSIMCFGVLSSALSSVITYHNPENRPKSGICVANHTSPIDVLVLACDNCYALIGQRHGGFLGLLQRALARASPHIWFERSEVKDREAVARRLREHVSDPNNPPILIFPEGTCINNTSVMQFKKGSFEVGGVIYPVAIKYDPKFGDAFWNSSRYSMMQYLYMMMTSWAIVCDVWYLPPMYQQEGETAIDFANRVKGVIARQGGLVDLMWDGQLKRMKPKKEWKENQQKEFSKRLKLE*
TR59915|c1_g5	1.36607	5.12276	17.2163	0.00115317	0.0104717	0	TR59915|c1_g5|m.9418	3-593[+]	0	0	0	ExpAA=30.58^PredHel=1^Topology=o15-32i	0	0	0	0	CTCCTTCGATCGAGTTTAAGGTCGTAAGCTACTTGAGAATGAAGTCGCCTGCCTACGTTGCTGTGCTTGCACTGCTGTTGGGCAGTGTGGCAGCTTCAGAAAGCTACGACCACAGACGCATGGTCGAAACACTGCTGCGCTTCGGTGCTCCTTCGATCGAGTTTAAGGTCGTAAGCTACTTGAGAATGAAGTCGCCTGCTTACGTTGCTGTGCTCGCACTGCTGTTGGGCAGTGTGGCAGCTTCAGAAAGCTACAACCACAGACGCATTGCCGAAACACTGCTGCGCTTCGGTGCAGAAAACGTCGGCCCCAAACTGCTGCCAGCCCTGAAAAAGAGCCACGTCGGTGACATCAGAGCCCTCGCTGATGACGCAGTAATAGTCAGCAAATACTCCTTCT…	PSIEFKVVSYLRMKSPAYVAVLALLLGSVAASESYDHRRMVETLLRFGAPSIEFKVVSYLRMKSPAYVAVLALLLGSVAASESYNHRRIAETLLRFGAENVGPKLLPALKKSHVGDIRALADDAVIVSKYSFSLQSTTQNVDGVLANLTLSGLPTLKVGRNGKSLLACNSQQILLLTAVYNPKRGRRPGKSYSLWSP
TR83774|c0_g2	1.36527	3.31981	22.6257	0.000379444	0.00756629	ANKR6_MOUSE^ANKR6_MOUSE^Q:1549-1007,H:49-259^36.79%ID^E:3e-22^RecName: Full=Ankyrin repeat domain-containing protein 6;^Eukaryota; Metazoa; Chordata; Craniata; Vertebrata; Euteleostomi; Mammalia; Eutheria; Euarchontoglires; Glires; Rodentia; Myomorpha; Muroidea; Muridae; Murinae; Mus; Mus`ANKR6_MOUSE^ANKR6_MOUSE^Q:1453-1007,H:14-160^32.89%ID^E:1e-09^RecName: Full=Ankyrin repeat domain-containing …	TR83774|c0_g2|m.15510	1001-1954[-]	ANKR6_MOUSE^ANKR6_MOUSE^Q:136-316,H:49-259^36.79%ID^E:2e-23^RecName: Full=Ankyrin repeat domain-containing protein 6;^Eukaryota; Metazoa; Chordata; Craniata; Vertebrata; Euteleostomi; Mammalia; Eutheria; Euarchontoglires; Glires; Rodentia; Myomorpha; Muroidea; Muridae; Murinae; Mus; Mus`ANKR6_MOUSE^ANKR6_MOUSE^Q:168-316,H:14-160^32.89%ID^E:3e-10^RecName: Full=Ankyrin repeat domain-containing prot…	PF13637.6^Ank_4^Ankyrin repeats (many copies)^130-184^E:4.3e-07`PF12796.7^Ank_2^Ankyrin repeats (3 copies)^133-228^E:1e-14`PF13637.6^Ank_4^Ankyrin repeats (many copies)^165-218^E:1.5e-10`PF13606.6^Ank_3^Ankyrin repeat^198-225^E:0.00016`PF13637.6^Ank_4^Ankyrin repeats (many copies)^200-251^E:3.2e-12`PF00023.30^Ank^Ankyrin repeat^200-229^E:7.3e-06`PF12796.7^Ank_2^Ankyrin repeats (3 copies)^235-316^…	0	0	COG0666^Ankyrin Repeat	KEGG:mmu:140577`KO:K21435	GO:0005737^cellular_component^cytoplasm`GO:0043231^cellular_component^intracellular membrane-bounded organelle`GO:0005634^cellular_component^nucleus`GO:0090090^biological_process^negative regulation of canonical Wnt signaling pathway`GO:0046330^biological_process^positive regulation of JNK cascade`GO:2000096^biological_process^positive regulation of Wnt signaling pathway, planar cell polarity pat…	GO:0005515^molecular_function^protein binding	TTATTTTAATAATGAAGAAAAGTCTTGAGAATTGAATAATGTGTTAATTGCCAGTAGCTCGTATTTCGACATGTTTCTAATTTTTAATGGGGTTATTATAAAATTATTCTTAATTTCATTTCATTTACTAATTATTGGTTTGTAGCAGAGTAACAGGTACACTAGCAGGCACAGTATTGATGAGATTTTCTAGTCTGCAGGACTTTTGAATTTCAGTAGAATATTTGTTTCTAGGTCGATGACCATATTGTACCTTTGAAAACGTTATCACATTTGAGACAAGTTTAATTTTCCAGTATTTTTTATAATTTTAGAAAATTTTTAAATCACATAAAAAGTGTATACCATGATTTAAAATTGAAATACTTGGATGTACCAAACATCATTAGGAGGGCTCGC…	LKARCEQLVAAQLSVETAAAAAVLAIRHSCTSLRQAAIDFIKANIAQVMTTRGWADAVRTQPEDVVTLGQLLADPPAETGTPASADGSGPQGDRGRTPTAAAPPTAAFTTPPPDDSAVSRLRSLPEKETNSRLIQAAKEDAVDELQTLLAAGADVEARDDGKDRWTSLHWAATRGHVKAARCLVEGGAHVDARCSSWQETPLHRAAINGHEAVARLLLEAGAEVDARNKTQSTPLLLAAYHGREAVVRLLLAATPYHNARDQWGETPLHNAALKGHAGVASALLEAGADRSSRNNQGKTPLDLARHKNHQHLADLLR*
TR67752|c0_g2	1.3619	0.765343	13.169	0.00307852	0.0160007	0	0	0	0	0	0	0	0	0	0	0	AGACAGTGTGGGCAGAGCACTTGTCAGAGGACTGCAGGAGACGTTTTTACAAAAACTGGTAAGTTTGATTCTTTGCTAGGACGCTAGATTTTTGTTGTGGTCTTGGATTTAGATTTTTATAAGTTTGAGTGGGTTTTCAAAATTTAGTCCTTAAATTGGCTTTAGTTGAAATTTCAAGAAAGAAGCTAACTGTTGGAAATCTTGTGACAGGCTTTGTCTTCCAAGAAATTGATAGGAACACCCTTTGTTGTAGTTAACATGTTTCTGCTTTGATGTGACTTGGTTATAACACAATAACAATAAAGTGAGGGAGATACTTTAGGGCTGGTAGTCGTTATGTGAGGCTCCAGGTTCCATAATGTTCTGACAAATCTATGTCAATTAGCAGCGTTTTCTTAG…	0
TR83527|c0_g1	1.3602	1.91415	9.69869	0.00825587	0.0286071	0	0	0	0	0	0	0	0	0	0	0	GTTTAAGTTCAATCAAGTACTGCGTTATCCTAGGGACCGATGACCTCAGCAGTTTGGCCCCATAGTCCTAGCCACAAATTTCCAAATTGTTGGACGATGTTTACAAACACGCTAGTTTTATAATATTACGTGCTCGATGATGTCGGTGGCGTAATAGGTCAATCAATATAGACCATAAAAGGTCGAATGGGGAAAATATTTCGTGCAGTCGCAAATTTTTGTACAGTGGTGGATGGAGTGTCGTGAACAACATACTAGAAATCCTGACCGGTGGGGGCTGAGTGTGGGTGAGGATGTGGGTTTGAAGGTCCCATCTCTAGCCTACGTTTTTCTCGAATAACTCGAAAAGTACGGTCCCTAGAGAAGACGTATGCCAGTACAAAATTTAACTTCATTAAA…	0
TR89551|c0_g1	1.35925	11.9279	16.9051	0.00123715	0.0107631	PE1_ANOGA^PE1_ANOGA^Q:1574-1206,H:32-147^38.28%ID^E:2e-12^RecName: Full=Peritrophin-1;^Eukaryota; Metazoa; Ecdysozoa; Arthropoda; Hexapoda; Insecta; Pterygota; Neoptera; Holometabola; Diptera; Nematocera; Culicoidea; Culicidae; Anophelinae; Anopheles`PE1_ANOGA^PE1_ANOGA^Q:1334-969,H:32-146^34.43%ID^E:2e-09^RecName: Full=Peritrophin-1;^Eukaryota; Metazoa; Ecdysozoa; Arthropoda; Hexapoda; Insecta; …	TR89551|c0_g1|m.16826	63-548[+]	0	0	0	0	0	0	0	0	ATCCGTACACGCTTGTGAGTAAATACAATATAACATAATTTTCATCAAAGAAAAACCACTGCATGTGTCAGACAATTTATTTTATTCATAAAATAGTACCCAAAGAAAAGTCAGCATATGGTATCACAGAACATAATAGCTTTTACAGATTCATTTTTTGGCGACAGAGCAGCCAGCAGAGTCGCGGTAGTCGCACACCTGAGCTTCAGCATTGTATTCGAGGCCAGGTGGGCAATCTTGCAGCACTGCATTTCCATCGAGGTCGCACTTGTAGAAGGTACTGCAGTCATCAGGGTTTGGAAACTGCACGACATTGTCTGGGTCGGCAGGAGAGGGACATTCAGGTGGCGGAGTGTTCGAGTTTCCGGCTGGTTTGCCCACGCTACCACTGTTACCAGA…	MCQTIYFIHKIVPKEKSAYGITEHNSFYRFIFWRQSSQQSRGSRTPELQHCIRGQVGNLAALHFHRGRTCRRYCSHQGLETARHCLGRQERDIQVAECSSFRLVCPRYHCYQRRRCSQQIRDQHGYSIEAALIERAAVIGVGEMDYNIRVSREGTFRWRSV*
TR69345|c0_g1	1.35368	0.997626	10.5617	0.00636233	0.0242912	0	TR69345|c0_g1|m.11905	893-1753[+]	0	PF06585.11^JHBP^Haemolymph juvenile hormone binding protein (JHBP)^82-263^E:3.3e-29	sigP:1^16^0.837^YES	0	0	0	0	0	CCAGCAGGCTCAACACATTAGAAATGTAACAGCTGCTGTCCAAATTACTGGATGTGCAAAGCACAGGTGATTGTGTTGTGAATTCAGTGATACCTCCCACCATCATCACGTGTGGACCTCATATCACTATGATGAATGCAGTCTGGCAATGTTTGATGTCCTCAGAGCCTCTGCACAAGGATGTGTTGTATGGGATACTCTATGCAGAACCTGGACTTGTCAGAAAAGACAGTGTGGTACCACTCCTGTGTCTAGTATCATCGCTGGGTGCACTTCTGTTGATGTGCCTCTCTCTGACTTATCTTGCTGTACATTAAGCCCTTATGCTGACAGAAGGTGCTTGATATGGTCATACAATCTCTGACGTTATCGTTCTCTCATTGATCGGTGCCCCTGAAA…	MKFWAVTCVLVALAAACSISAASAPPRRPSLTVSNAILRSLARLPRAEAVRRFRNLVLGHQRNAIDDAIIQLLEELRSIIPEPVSISHVDVDLQSSILELTGAFDNVTINGLTSYVINSVNNDLDNLQANFSVGIPEINFAGQYNLEGSAGSIVGLYGEGPFTLLVQDFQTSGTVHIGTADGSSNSAVSITAMEVSFSVAVFRVNFENLNGGGLVGDLLNELISDLAPEFIALNQEQLGDLVEQIVRDLVNPYLGTCTLQELLDFLGYEGRRMRRADSTCILYQLP*
TR56550|c0_g3	1.34863	8.4991	13.6579	0.00271103	0.0150454	0	0	0	0	0	0	0	0	0	0	0	CTGGAAACCAGCCCCGACTTCAAGGAGCTGTACGACAGGATCAGGTCTCCCGAATTCCAGTCGATCGTGGAAACTCTGAACTCGCTGCCAGAGTACCAGGAGCTGCTCCAGAAACTGAGGGACGCTGGCATCGACGTCGACGCATTCATTGACCTGATTCGCGGTCTGTTCGGCTTGCCTACGAGGAAATTGTAAACAGTGACTGTCAACTGTTAAATACAATGTGTCATTGCCCATGGTGTCCATTACGGGAAGACTGAAGTGTTGTTTTCTAACTATGAGCACGTGAATAAATTATTTTCCAGCGTAAAAAAAAAAAAAAAAAAAAAAA	0
TR82403|c2_g2	1.34735	3.22815	21.4894	0.000471831	0.00789236	COGS_HYPLI^COGS_HYPLI^Q:219-112,H:223-258^58.33%ID^E:3e-07^RecName: Full=Collagenase;^Eukaryota; Metazoa; Ecdysozoa; Arthropoda; Hexapoda; Insecta; Pterygota; Neoptera; Holometabola; Diptera; Brachycera; Muscomorpha; Oestroidea; Oestridae; Hypodermatinae; Hypoderma	0	0	0	0	0	0	0	KEGG:ag:CAA52359`KO:K20752	GO:0005576^cellular_component^extracellular region`GO:0004252^molecular_function^serine-type endopeptidase activity`GO:0030574^biological_process^collagen catabolic process	0	TTTTTTTTCATGTACTGATTTATTTATTTGAGGCTCTGTATTGTTCACAGTTTCTTCTCTCGAGGAATTTGGAAATAGCTGGTGATGAATGTGCTGCCTTTACGGAATGGTGATGCCGGCGGTACTTGAGATCCAGTCGAGGAAGTAGGTGACCCTGGTGAAGCCGGCCGGGTCTCCGCTCGAACAGCCCTTGCCCGAAATCCAGCTGACGACGGCGATCTGCGTGTAGCTTCCCTGT	0
TR42645|c0_g2	1.34488	4.72608	16.2313	0.00144445	0.0113274	C1139_DROME^C1139_DROME^Q:11-652,H:123-334^40%ID^E:4e-38^RecName: Full=Proton-coupled amino acid transporter-like protein CG1139 {ECO:0000305};^Eukaryota; Metazoa; Ecdysozoa; Arthropoda; Hexapoda; Insecta; Pterygota; Neoptera; Holometabola; Diptera; Brachycera; Muscomorpha; Ephydroidea; Drosophilidae; Drosophila; Sophophora	TR42645|c0_g2|m.4581	2-670[+]	C1139_DROME^C1139_DROME^Q:4-217,H:123-334^40%ID^E:6e-47^RecName: Full=Proton-coupled amino acid transporter-like protein CG1139 {ECO:0000305};^Eukaryota; Metazoa; Ecdysozoa; Arthropoda; Hexapoda; Insecta; Pterygota; Neoptera; Holometabola; Diptera; Brachycera; Muscomorpha; Ephydroidea; Drosophilidae; Drosophila; Sophophora	PF01490.18^Aa_trans^Transmembrane amino acid transporter protein^13-217^E:4.7e-39	0	ExpAA=125.85^PredHel=5^Topology=i20-42o57-74i81-103o118-140i152-174o	COG0814^amino acid transport	KEGG:dme:Dmel_CG1139`KO:K14209	GO:0016021^cellular_component^integral component of membrane`GO:0005886^cellular_component^plasma membrane`GO:0015171^molecular_function^amino acid transmembrane transporter activity`GO:0003333^biological_process^amino acid transmembrane transport`GO:0040008^biological_process^regulation of growth	0	CTTCCTGTATGGGCCGAGCCGCCTCAAGGCATGGGCCCGATTCTCCAGGACGTTTGTCAACATAGCACTGCTGACCACCTACTACAGCACCTGCTGCGTCTACCTCATCTTCGTCGCGTCGAGCATCAAGCAGGTGTGCGACCAGTGGTTTCCGTGGGCACAGCTGGACATTCGGATCTACACGGTCCTGCTACTGCTGCCGTTGGTGCCCGGTTGCCTGCTGCGCAACCTCACGTATCTGGTGCCCTTCTCGGCGACTGCCAACGTTTGCATCGTGGTGGGCTTCGCCTGCACGCTCTACTACATGCTTCGTGACCTGAATGACCCCGGGGAGTTGCCCCTCAGTGTGGACGTCGCACGCTTTCCGCTCTTCTTCAGCACTGTCGTCTTCGCCATGGA…	FLYGPSRLKAWARFSRTFVNIALLTTYYSTCCVYLIFVASSIKQVCDQWFPWAQLDIRIYTVLLLLPLVPGCLLRNLTYLVPFSATANVCIVVGFACTLYYMLRDLNDPGELPLSVDVARFPLFFSTVVFAMEGIGVVMPVENEMRHPQHFLGLGGVLNIAMAVVVSLYALIGFFGYVTYGEKTEGSITLNLPVDERLAQAVKILIGLAVLLTYPLNKAYSE*
TR68897|c0_g1	1.34292	2.04634	16.9658	0.00122024	0.010687	0	0	0	0	0	0	0	0	0	0	0	TTTATTCAACATATATATCAAAAACATGTAACCTATGTCTCTCCAAACATTTATTAGAGAATAGCGCAAAAATTTGAAATAAATCAGTCAAGAACGCTTCGAACTTCTTGCTAACGACTTTTATACTTGTTAACAATTTTTATAACACATACATTAAAGATGAGATCAATTGAATTAAATAGAACAATTTTTTCCACTTTTCATAGATGAAGAGTGTTTACAATTTGACAACAGCTTTCCCAAAGTTCTCGCCTCTCAGCATGCCGATGAAGGCTTTGGGAGTATTGGCAAAGCCGTGG	0
TR67779|c1_g2	1.34035	2.31995	14.5066	0.00218717	0.0135841	0	0	0	0	0	0	0	0	0	0	0	GGCTAACTTTTAATATAATAGGTCATATTTCCGTCAACTTTTGCCAAAAATGCATATACCGTTTTTCTCGTATCTTACGGGACACACGAATAAGAAAATGAATATGTTGCCTACCATGTCTGTATCTGCAGAAGTTGTGTGGTCTGATAGCTTTTTTTGCTGTCTTTGTTCTTTGGACAGTTTGCTTGACCATTTTGCTGAGTTCAGCTTGTGCCAAGTATGGAATTGGTTTCTGGAAACCTGGTTCTGGGATCATTCATCAGTTTGCTTGACCATTTTGCTGAAGAGATATTGCTGCCTTCGTAAGGAAGTTACTGGAACCTGCATGAGTTGACAATGTGATGAGGTTTAGGACAAAGAGAGAACAATATTATTCATTAAAATTGGAGTTCTTCATTC…	0
TR93819|c0_g1	1.34008	2.83087	11.4011	0.00498893	0.0210995	0	0	0	0	0	0	0	0	0	0	0	TTTTTTTTTTTGTCTCACTTTTTTTAATGAAAATATTATTTAATGTTTTACATTGTGGTAAGAGAAGTAACTTCTTTCTTTATTTAGAAGTCAGCTTCAACTCTTTTAGTTCACATGATGATTCAGATGAGAGTAGAAATGAGAATAGAATCAGCTGTAAAAATAGCCAGAATCCTGGTTTTGCAGACCACCACAGTTGAGTGCCTTATCCTTGGGCATATGGAGGTGAGCCATTAGTTCTTAGGTAGAATGTTCCAGTTGTCCCAGATGGAGTGGGAGCACCCATTGCCACTTGAGCATTTCCATTGCAGTTTCCATTTTGAAAATTATTCCAACTATCACACTGATAGCTGACAAAAGCAGAAGACGTG	0
TR64938|c0_g1	1.33965	-0.183458	21.3709	0.000482884	0.0079156	0	0	0	0	0	0	0	0	0	0	0	GCTGGAATCATGTTATTTAAAAAATTTTCATTCATGTATCTTAGTTACATGACAATTTGCTTTCATGCAGTGATCACAATAAAAATAACTAGTCCACGTGTAAATGTAAAACATTTGGTCATTGCAAAGCAGTATACCCCTCTAACTCCAGCAAAATTGTAGAAATTATTATACTGGTAATAGTACATAATGTTTCTATACCATACTACACAGCATTTTAATGTACTGTGTACACAGGTGTAGAAGTTCTGTTTTCAGAATTTCACAGTAGGTTTCTGGAAACTTAGATTACTGTAACTCCATGCTACTATGCTTATTTATTTCACACCCTGGATGTACACATCTCCAGTAATGATATAATTGTTGTAAATCACGTCATCTATTTTTGTGGTGGAACAC…	0
TR107208|c0_g1	1.33883	2.32109	39.9026	2.72659e-05	0.00694482	0	TR107208|c0_g1|m.1525	51-1016[-]	0	PF00135.28^COesterase^Carboxylesterase family^15-263^E:2.1e-15	0	0	0	0	0	0	GAAAAAGAGTCATTTAATGAAAATCACGGTACAAATACAGGCGTGCGGCGTCAGAGCTCGATCTTCCTGATCTGGTCCTTGGTGGCCTCCTCGGACTTGGCCCCGCCGGCCGCCCGCTCCTCGGCGGCTCGCCGCTCCTCCTCCTGGGCGAACAGCCGGCGCTGCTCGTCGCGGATCTCCTCCTCCGACCGCAGCTCTGCGGCGCGCGCCTCGGCCAGCGCATCCTCCCAGAAGGCCACGCGCTCGCCGCGCACGCCGCCGCTCTCCAGGTCCAGCGTCTCCCCGAGCAGCAGGTACGAGTAGTTGGCAAACACGGCGTCGTGCCACGAGAAGTCGTCCAGCACGGGGTCCGGCTCCGGGGTCGGGTCCCCCTCATGCGCAAAGTTCAGAATAATGTGC…	AKALVRHAANVTDRGTPFAPTLEPFMPRNRTLRFNTTEKMIEFSVVIKEQRCWIIGTNSRDGLAQASKVLDSPELMQKLNDDPETELPKYLGIVVEGEPEMMAKIGRRAWEYYFGDEKLTKDNINLLVEMTGDFNTFHGVSRSIELHTLHTTVPMFAYHFHWNGDGNSGSQGLPEDYDFRLMLPKTVDGKKTEYTEKEQKFVERMLHIILNFAHEGDPTPEPDPVLDDFSWHDAVFANYSYLLLGETLDLESGGVRGERVAFWEDALAEARAAELRSEEEIRDEQRRLFAQEEERRAAEERAAGGAKSEEATKDQIRKIEL*
TR33852|c0_g1	1.33555	0.948642	16.5827	0.0013317	0.0110274	0	0	0	0	0	0	0	0	0	0	0	GTGACTTGTAATCCAACATGCCAAAATAAAATATCTCCTAATGTTTAGGTGACATACCAACTGCTTGTGTAAAGTTGAGAATGAAATGCTTGTTACAAAATATTTACTTAATGTGCCATATATAGTTCATCATTTAAGTGTACTATATTCTTCCTCAACCCTTCAGATACAAAAACAAGAAGAAATGCAACTTTACAAAAAAATTTGTTTTTGAATTAGCAATGTGATAAATGTTTCTGTGGTCAAATCTCTCACCAAACCAGAAAACAG	0
TR59908|c0_g1	1.33493	3.49055	20.7464	0.000546344	0.00824978	EST6_APIME^EST6_APIME^Q:383-1159,H:47-229^33.2%ID^E:3e-35^RecName: Full=Venom carboxylesterase-6;^Eukaryota; Metazoa; Ecdysozoa; Arthropoda; Hexapoda; Insecta; Pterygota; Neoptera; Holometabola; Hymenoptera; Apocrita; Aculeata; Apoidea; Apidae; Apis`EST6_APIME^EST6_APIME^Q:1388-1723,H:197-352^27.39%ID^E:2e-06^RecName: Full=Venom carboxylesterase-6;^Eukaryota; Metazoa; Ecdysozoa; Arthropoda; Hexap…	TR59908|c0_g1|m.9405	332-1381[+]	EST6_APIME^EST6_APIME^Q:18-276,H:47-229^33.2%ID^E:8e-38^RecName: Full=Venom carboxylesterase-6;^Eukaryota; Metazoa; Ecdysozoa; Arthropoda; Hexapoda; Insecta; Pterygota; Neoptera; Holometabola; Hymenoptera; Apocrita; Aculeata; Apoidea; Apidae; Apis	PF00135.28^COesterase^Carboxylesterase family^19-120^E:4.2e-24`PF00135.28^COesterase^Carboxylesterase family^113-209^E:1.3e-26`PF00135.28^COesterase^Carboxylesterase family^222-280^E:8.8e-24	0	0	COG2272^Carboxylesterase	KEGG:ame:410928	GO:0005576^cellular_component^extracellular region`GO:0080030^molecular_function^methyl indole-3-acetate esterase activity	0	TGCTTCGACATTTTCTCACAGACAGCAATGCCTCACATAAAAATTGCATATCTTGCCTTTGCTCTTTTCATATATGGTTTAGTGAAGCAAACTGAGGGTGCACCACGAATATACGTAACAGTCGAGTGCTTTGACATTTTCTCACAGACAGCGATGCCTCACATAAGAATTGTGTATCTTAGCTTCGCTCTTTTGATATGTGGTTTAGCGAAGCAAACTGAGGGTGCGCCACGAATATACGTAACAGTCGACACACCTCTGGGTCCCATAAGAGGTCGTCAACTTAATACCACAACTGGCAACCCTGTATATACCTTCAAAGGAATTCCATATGCTGAACCACCAGTTGGATCATTACGGTTTCAGCCACCAGTACCTGTGTCTTCTTTATACCTTCAA…	MLNHQLDHYGFSHQYLCLLYTFKGIPYAEPPVGSLRFKPPVPVSSWTEENVSSWTEEKDALETPNRCIQMDGLGNIKGDEDCLYLNVFSPELPSDTSIPRPVLVLIHVGCFRTQTPNRCIQMDGLGNIKGDEDCLYLNVFSPELPSDTSVPRPVLVLIHVGCFRTGYAQQRYLDYYIDHGIVVVSIQYRLGALGFMSTGDSLLPGNLGSLLPGNLGMKDQVLLPGNLGMKDQVLALKWIKQNIRAFGGNPDEVTISGQSSGGSAVHYHVLSPLSKGKHLVVIQMKLLFLVRVQEDLQYIITCCHHYQKVLLMQRNLSKQGGQLWIQRTVKMPLSVFGLHMWNQKTKVHS*
TR63470|c0_g1	1.3347	0.659992	7.77727	0.0154097	0.0434466	EST6_APIME^EST6_APIME^Q:948-1583,H:165-371^36.04%ID^E:8e-33^RecName: Full=Venom carboxylesterase-6;^Eukaryota; Metazoa; Ecdysozoa; Arthropoda; Hexapoda; Insecta; Pterygota; Neoptera; Holometabola; Hymenoptera; Apocrita; Aculeata; Apoidea; Apidae; Apis`EST6_APIME^EST6_APIME^Q:59-562,H:3-173^36.42%ID^E:3e-25^RecName: Full=Venom carboxylesterase-6;^Eukaryota; Metazoa; Ecdysozoa; Arthropoda; Hexapoda…	TR63470|c0_g1|m.10189	41-565[+]	EST3_PONAB^EST3_PONAB^Q:24-174,H:25-188^43.03%ID^E:2e-29^RecName: Full=Carboxylesterase 3;^Eukaryota; Metazoa; Chordata; Craniata; Vertebrata; Euteleostomi; Mammalia; Eutheria; Euarchontoglires; Primates; Haplorrhini; Catarrhini; Hominidae; Pongo	PF00135.28^COesterase^Carboxylesterase family^31-174^E:5.8e-51	sigP:1^16^0.859^YES	0	COG2272^Carboxylesterase	KEGG:pon:100172153`KO:K15743	GO:0005788^cellular_component^endoplasmic reticulum lumen`GO:0080030^molecular_function^methyl indole-3-acetate esterase activity	0	AGATAAACATTTCTGGGTTTAGCAGTTTGAAGCATTGCCAATGATGATACTTTTCAACATTTTATGTCTAACTTATGTTGTGCTAAGTTGCACTACTTTGGAGCAAGTTCAGGGTGCAGAAAGGATATACAAAACAGTTGACACACCTCTAGGTCCTATTAGAGGTCGGCAGTTTAACACTACATCTGGTAATCCTGTGTTTATTTTTCGAGGTGTTCCATATGCTCAACCTCCAGTTGGAACTCTTCGTTTTAAGCCTCCAGTGCCTCTAATCCCGTGGACTGAAAGGAAGGACGCTCTGCAGACACCTGAAAGATGCATACAGTTGGTCTCTACAGACAATATAATGGGATCTGAAGACTGCCTGTATCTGAATATTTTCAGCCCAGAGTTACCATC…	MMILFNILCLTYVVLSCTTLEQVQGAERIYKTVDTPLGPIRGRQFNTTSGNPVFIFRGVPYAQPPVGTLRFKPPVPLIPWTERKDALQTPERCIQLVSTDNIMGSEDCLYLNIFSPELPSNTSTPRPVFVMIHGGGFRTGYAQSYSPDFYVDSGILVVSIQYRLGPLGFMSTGD*
TR67399|c0_g1	1.33299	4.17948	10.8579	0.00583256	0.0230068	TRY7_ANOGA^TRY7_ANOGA^Q:977-309,H:54-263^40.81%ID^E:7e-40^RecName: Full=Trypsin-7;^Eukaryota; Metazoa; Ecdysozoa; Arthropoda; Hexapoda; Insecta; Pterygota; Neoptera; Holometabola; Diptera; Nematocera; Culicoidea; Culicidae; Anophelinae; Anopheles	TR67399|c0_g1|m.11001	300-1187[-]	TRY7_ANOGA^TRY7_ANOGA^Q:23-293,H:7-263^38.38%ID^E:2e-44^RecName: Full=Trypsin-7;^Eukaryota; Metazoa; Ecdysozoa; Arthropoda; Hexapoda; Insecta; Pterygota; Neoptera; Holometabola; Diptera; Nematocera; Culicoidea; Culicidae; Anophelinae; Anopheles	PF00089.26^Trypsin^Trypsin^59-291^E:1.6e-55	0	ExpAA=18.64^PredHel=1^Topology=i21-40o	COG5640^protease	KEGG:aga:AgaP_AGAP008293`KO:K01312	GO:0005576^cellular_component^extracellular region`GO:0004252^molecular_function^serine-type endopeptidase activity`GO:0008236^molecular_function^serine-type peptidase activity`GO:0007586^biological_process^digestion	GO:0004252^molecular_function^serine-type endopeptidase activity`GO:0006508^biological_process^proteolysis	TGTTATTTCCAACTGACTATCCTGCTGTGCAGTCATTCTTTATTTACAGAATGTGGATGGTGTTACTCCTGCCTGCTTTTCACAGCTGTGCTAATCATCATCAGACATGTAGTACACTTCACGCTAATCTGGCATTCGTTGCATGTCGCGTTTATAACGTTGCAATTTTAATGGCCATCTGTGTATCCGTCTTGTAACAAGCATAATGTGAAACAGAAAGAATAAAAGGAAATTGTATTTTGCTCTTAAGATCAGTTTATTATGTCACTGAAACTGATAACAGCTGCAGCGCCGCCGATTTAAAGGTACTGATTGATGAAGTCTTCGTAGGCAGAGACCCTGGTGAAGACGGTTGGCGCGCCCTCGGAGCCGCACGGCATCAGACCCCAGGACACGATC…	RTAAHCSSSSTTTTTTTITMRTVLLSLALTACVFAAELPIRRIPHSGIHRGFGRFRGRIVGGQDATRGQFPYQVSLQWVVLGISSHTCGGSIISTKAVLTAGHCTQSGLLGYYVAVAGEHDLSADEGTEQTIEVAEQILHPDYRPWGNVAINDVAVFTLQSELTLDTYVQKIALPVADSVPTAGSIAALSGWGSTKSGILPHDPDILQYVDVTVIGMTECYELLENYSALNDNNVCTGPVTGGIAACTGDSGGPLAQDGTVIGIVSWGLMPCGSEGAPTVFTRVSAYEDFINQYL*
TR40004|c0_g1	1.33211	3.48119	31.699	8.3345e-05	0.00694482	0	0	0	0	0	0	0	0	0	0	0	GAGGTACTGCATTATTTTTAATTGTTTATTTTTGCTTTGCTCCACAACGAAGAGCAGACATTGTTACCTAGAACACACAAAAACATAACGTCCACACTCACTTCACATTTATGTTAAACATCAATGAAATTCATCATGATAAATAACAATAAATAGAAAAATATGTTGCAACAGTACACTGCTTCAGTTTTCTTGTCTTGATCAGCCAGGATCAGATATTGTGAAATATTAAGTTTTGGAAAAAAAGTAGTTCATCAATTGACATTAACGATTACACGAAAAATACTTTTAAAAAATGTAACCATAGATAGTCACTGCAGAAAACTATCCACAAGTAAGGCATCAACTCTGTTTCTGTCCGTGTTAAGAAAACGTAAAAATCTCACGTAAGTACGAACG…	0
TR81787|c0_g1	1.33029	7.47197	23.1488	0.000344075	0.0073888	MAL1_DROVI^MAL1_DROVI^Q:1879-287,H:69-597^48.04%ID^E:1e-166^RecName: Full=Maltase 1;^Eukaryota; Metazoa; Ecdysozoa; Arthropoda; Hexapoda; Insecta; Pterygota; Neoptera; Holometabola; Diptera; Brachycera; Muscomorpha; Ephydroidea; Drosophilidae; Drosophila	TR81787|c0_g1|m.14781	170-1945[-]	MAL2_DROVI^MAL2_DROVI^Q:36-583,H:43-589^47.1%ID^E:6e-175^RecName: Full=Maltase 2;^Eukaryota; Metazoa; Ecdysozoa; Arthropoda; Hexapoda; Insecta; Pterygota; Neoptera; Holometabola; Diptera; Brachycera; Muscomorpha; Ephydroidea; Drosophilidae; Drosophila	PF00128.24^Alpha-amylase^Alpha amylase, catalytic domain^59-410^E:8.4e-91	sigP:1^19^0.918^YES	0	COG0366^alpha amylase, catalytic	KEGG:dvi:Dvir_GJ22506`KO:K01187	GO:0004558^molecular_function^alpha-1,4-glucosidase activity`GO:0032450^molecular_function^maltose alpha-glucosidase activity	GO:0003824^molecular_function^catalytic activity`GO:0005975^biological_process^carbohydrate metabolic process	TTTTTTATTTCTCAGTGATCGACGTGGAGTATTGCCTTTATTCCAAAATTCACAAAATTAGAACAAGAAATAAGACATATGGAGATAATTGTTTCCTTCACATGTATCAGTTCTGAAGCGTGCCAGTTCTCATACGTTCCGCTGGCAATCTCTGCAACTGTAGAACAGCTTAAGCGGCGCTTGTAGAGTTTGCAACGAGCACCAGACCCACCCCGGCTTCCAGGGTCACAGACTGTGAAGACACCGTTGCCCCGCTCTGCGTGCTTGAGGAGATGCTGGCGGCGTGGACAGTCAGCTGGTCAGGCAGACCAGCGAAGGTGGCCGACAGGTCCACCGTCTCCACGTCGGTTCCCAGGTTACCCACCACCACCACCGTCGGTTCCCCGTCCAGCGTCCTGG…	MRVLGVTVVLCLLAASVSADPVRVRQPKADDEELAWWQTSVIYQIYPRSFKDSNGDGVGDLRGIINQLEYLQQLGVGAVWLSPIYQSPMVDLGYDISNYFEIDPVFGTMDDFNEFRDKAHSLGLQVMMDYVVSYTSDLIEWFQKSLRREDGYDEWYVWAVGERNESAPHGYNVPSNWLSLFRGSAWEWSEERQQFYLHSFTVNQPDLNYRDDGVVLQMKDVLRFWLDKKVDGFRVDAVSQMYEAEGFPDELPSGLTNDTEANNYLQHVQTQNRPETYEMIKQWRAILDEYQAADGKAKAMMLEVYDDPEIVMPYYGTPEEPGAQFPFNFYFISQLNAQSNASEVNRAVHLWMDNMPEGNWPNWVLGNHDQPRVGTRLGVARKDLFNMISLLLPGTAITF…
TR36332|c0_g3	1.3298	8.37239	21.6543	0.000456931	0.00789236	FABPM_SCHGR^FABPM_SCHGR^Q:543-932,H:2-133^64.39%ID^E:6e-44^RecName: Full=Fatty acid-binding protein, muscle;^Eukaryota; Metazoa; Ecdysozoa; Arthropoda; Hexapoda; Insecta; Pterygota; Neoptera; Polyneoptera; Orthoptera; Caelifera; Acrididea; Acridomorpha; Acridoidea; Acrididae; Cyrtacanthacridinae; Schistocerca	TR36332|c0_g3|m.2589	2-418[+]	0	0	0	0	0	0	0	0	CGCCACTCAGTCCGACCAGGGCACTCCAGCACTCCAGCTCCAGCTCCAGCTCCAGCTCCAGGAACAGCCCGGCATCCCAGCACGCGACATGTCTCTCGTCTTCGATAAGCAGTACAAGCTCGCCGAGAGCGAGAACTTCGACGAAGTCATGAAGGCTCTGGGTGTGGGCATGGTGACCCGCAACGCCAGGCGTCACCAAGGTTGCCAACGGATTAGCGAACTCACTCACCGAGTCTGCGATGGCAGAGCTGGACGGTGTCCTGGGAAAGAGGTACAAGCTCTCCTCCAGCGAGAACTTCGATGCCGTCATGAAGCAGCTCGGTGTGGGCATGGTGACCCGTCACGTGATCACCCCCTCTCCGAGCACTCGAGCCGTGCCTTCGCCCTACGTCATCTCGG…	ATQSDQGTPALQLQLQLQLQEQPGIPARDMSLVFDKQYKLAESENFDEVMKALGVGMVTRNARRHQGCQRISELTHRVCDGRAGRCPGKEVQALLQRELRCRHEAARCGHGDPSRDHPLSEHSSRAFALRHLGSVAAV*
TR91565|c0_g1	1.32958	2.82297	32.8915	6.99659e-05	0.00694482	CASP6_MOUSE^CASP6_MOUSE^Q:270-4,H:12-91^42.7%ID^E:5e-10^RecName: Full=Caspase-6;^Eukaryota; Metazoa; Chordata; Craniata; Vertebrata; Euteleostomi; Mammalia; Eutheria; Euarchontoglires; Glires; Rodentia; Myomorpha; Muroidea; Muridae; Murinae; Mus; Mus	TR91565|c0_g1|m.17644	1-426[-]	CASP6_MOUSE^CASP6_MOUSE^Q:53-141,H:12-91^42.7%ID^E:4e-10^RecName: Full=Caspase-6;^Eukaryota; Metazoa; Chordata; Craniata; Vertebrata; Euteleostomi; Mammalia; Eutheria; Euarchontoglires; Glires; Rodentia; Myomorpha; Muroidea; Muridae; Murinae; Mus; Mus	0	0	0	ENOG410ZQIE^apoptosis-related cysteine peptidase	KEGG:mmu:12368`KO:K04396	GO:0030424^cellular_component^axon`GO:0005737^cellular_component^cytoplasm`GO:0005829^cellular_component^cytosol`GO:0043025^cellular_component^neuronal cell body`GO:0005654^cellular_component^nucleoplasm`GO:0005634^cellular_component^nucleus`GO:0097153^molecular_function^cysteine-type endopeptidase activity involved in apoptotic process`GO:0097200^molecular_function^cysteine-type endopeptidase ac…	0	GTCGTGGTCCTGCTCCGCCACATGTCTGAGTTCACTGGTTATTTCCTCATGGCTCCTATCGTTGAAGCAGAGTACTTCGAAGCCGAGCATTACGAATGTGAGGCGAAGTGCGTCTCTGTCGACGTCTGTGCCCTCTCTCGCAGTTGGCTGGTAATCCCCATCTGGATGTTGGCGAACGTCGAAGTTCTTGTGGCTGAAGATGAGTGCTACACCACGCGGTTGGTGGCCCATGCAGTACTCTTCATTGCTGACACCAGCGTCGAACACCTCAATCGGACCAGATTGGGGTCTAATGCTGGGAGCAAAGCTTCTAGCTTGGTGAGTGTATTTAATGTTCTCTCTTCTGTACTGTTGGAGGTTCGTCATTGGGGCTGCAATGTCCGCTTCCTTGGAGACCTC…	MEHRHAGRSEVSKEADIAAPMTNLQQYRRENIKYTHQARSFAPSIRPQSGPIEVFDAGVSNEEYCMGHQPRGVALIFSHKNFDVRQHPDGDYQPTAREGTDVDRDALRLTFVMLGFEVLCFNDRSHEEITSELRHVAEQDHD
TR53737|c0_g1	1.32871	2.24693	11.8287	0.00442354	0.0197202	0	TR53737|c0_g1|m.7500	3-941[-]	0	0	0	0	0	0	0	0	CCCTCTGAGTCAGGAGCCCCCACTATCCAGCTGAATAGCCTCCAGCGCGTGTCCACATCTCCAGCCCACAGTTTCAGCAGGCCTGGGTGTTCCACATTGAGTGGCAGGTGCTTTTGGACCTCCACTTGCTCCCGGTACACCTCCGTCTTCCTGGTCACCAGCTCCTCGACATGAAATGGACCGTCTCCACTTTCCCACAGCAGTACACTGTACATCCTGCTCCTCATACTTTTAAGCACGTCTCCTGTCGCCATTCCATCATACTCATCGTGGAAGAGCTCTTCCAGTGCAGGACCAGTGTCCAACGTGTGACACTTGGCAACTGAGAGTACGGCTGCTGGTATCTCACCAGACAAGTGTTTTGCTGTAATGCGCTGGAGAACAGCAGACCAGCTAGAC…	LPEGLIPCARVNFRDVPSTEVRLCVDDYYQETAQFAASCKNCLGVMSNTATFLIYKDAKNMFTFGGSHQIDGEVRMMRFRSSAIASHLGIQQQDLPALVTFAGSDNINLEERRRVHGRLSSRYGRREHLASVVAELVKNNTVEEMCRIAFGSRWREFVDTVKADIDHFRYKRRATVMASDKSSWSAVLQRITAKHLSGEIPAAVLSVAKCHTLDTGPALEELFHDEYDGMATGDVLKSMRSRMYSVLLWESGDGPFHVEELVTRKTEVYREQVEVQKHLPLNVEHPGLLKLWAGDVDTRWRLFSWIVGAPDSE
TR34393|c0_g1	1.32566	0.731823	31.8929	8.0981e-05	0.00694482	0	TR34393|c0_g1|m.2334	152-505[+]	0	0	sigP:1^21^0.922^YES	ExpAA=43.31^PredHel=2^Topology=i7-26o76-98i	0	0	0	0	CCAACGTGAGAACGGAGTGCTGACAACGCTGTTGTCGAAAGACCGTCGAAGACTCATAGGACTTTGACATAACAATGGTACATGACGCTAATCGGGAGAGTTGTTCGCGTTAGCAGCATCGTAAGGTGCGGCTTCGCTAACAAAGCGGAGAATGATTCGCTTCAGTATTATATTTCTGTTGCTATGCATGTGTATGATTTTGTCAGTGGAATGTCAAGCCTGGAATTCGAAACTAAACAGACAGGGATTCAGAGGTTACTATGGTGATCGAGGATTTGACGAGACAACACAGGCACCAAAAAGAAATAACAACCATAATAATAATAATAATGTTGCTGCAAAACCAAAAATGAGAGCAGGGGTTGGACTTGGTGCATGGGGCATTATTGCTATTGTGCT…	MIRFSIIFLLLCMCMILSVECQAWNSKLNRQGFRGYYGDRGFDETTQAPKRNNNHNNNNNVAAKPKMRAGVGLGAWGIIAIVLAIIFAAVGLYYVILFYPILCKEERKYNVIELDAV*
TR37582|c1_g2	1.32505	7.29087	7.28059	0.018313	0.0489995	NAAT1_DROPS^NAAT1_DROPS^Q:3-1727,H:62-650^56.18%ID^E:0^RecName: Full=Sodium-dependent nutrient amino acid transporter 1 {ECO:0000250|UniProtKB:Q9W4C5};^Eukaryota; Metazoa; Ecdysozoa; Arthropoda; Hexapoda; Insecta; Pterygota; Neoptera; Holometabola; Diptera; Brachycera; Muscomorpha; Ephydroidea; Drosophilidae; Drosophila; Sophophora	TR37582|c1_g2|m.3045	36-1736[+]	NAAT1_DROPS^NAAT1_DROPS^Q:1-564,H:73-650^55.69%ID^E:0^RecName: Full=Sodium-dependent nutrient amino acid transporter 1 {ECO:0000250|UniProtKB:Q9W4C5};^Eukaryota; Metazoa; Ecdysozoa; Arthropoda; Hexapoda; Insecta; Pterygota; Neoptera; Holometabola; Diptera; Brachycera; Muscomorpha; Ephydroidea; Drosophilidae; Drosophila; Sophophora	PF00209.18^SNF^Sodium:neurotransmitter symporter family^2-501^E:4e-145	0	ExpAA=247.07^PredHel=11^Topology=o13-35i72-94o158-176i185-207o231-253i266-288o324-346i367-389o399-421i442-464o479-501i	0	KEGG:dpo:Dpse_GA16959`KO:K05038	GO:0005887^cellular_component^integral component of plasma membrane`GO:0005283^molecular_function^amino acid:sodium symporter activity`GO:0042943^molecular_function^D-amino acid transmembrane transporter activity`GO:0015179^molecular_function^L-amino acid transmembrane transporter activity`GO:0005328^molecular_function^neurotransmitter:sodium symporter activity`GO:0015175^molecular_function^neutr…	GO:0016021^cellular_component^integral component of membrane	GGAACCAACTGGAGTTTCTCATGTCGTGCATCGCCATGTCCGTCGGCCTGGGCAACGTGTGGCGCTTCCCGTTCACCGCCTACGAGAACGGCGGCGGCGCCTTCCTCATCCCCTACATCATCGTGCTGTTCGTCATCGGCAAACCGCTCTACTACATGGAGATGGCGCTCGGCCAGTTCACCAGCTACGGGCCCATCAAGGTCTGGTACATGGTGCCCGCCCTTAAGGGTATCGGGTACGGACAAGCGTTGGCAACTATTGCTACGCTAACTTACTACTGTTCGTTGATGGCTATCACATCCTTGTACTTTGTATTGTCATTTAGTTCTGAACTTCCCTGGGCCAAATGCCTCCCTGAATGGGAAGGGTACTGCGTTGACTCCACTGGCAGTGGAGGTA…	MSVGLGNVWRFPFTAYENGGGAFLIPYIIVLFVIGKPLYYMEMALGQFTSYGPIKVWYMVPALKGIGYGQALATIATLTYYCSLMAITSLYFVLSFSSELPWAKCLPEWEGYCVDSTGSGGNFTANNTNLQSSSELFFLKYVLNEVADIAEGIGVPDWRLTIGLAVTWITIFFVVWKGVKSSGKASYFLALFPYVIMIVILIRGATLPGAGDGILFFITPQWDRLLTIEVWYAAITQSFFSLTVCFGPLIMYSSYNDFNHNVHRDALIVTTLDTFTSILAGCTIFSILGNLAYEMGIDDISAVVNSGTGLAFISYPDAIAKFEFVPQLFAVLFFFMLFVLGVGSAVALDSAVNTIIRDDFPSIKQWMVAALTCVGGFLTGLVYITPAGQWILNLVDYYN…
TR78286|c0_g1	1.32325	4.07399	10.9014	0.00575932	0.0228304	CP4C1_BLADI^CP4C1_BLADI^Q:1708-266,H:26-505^59.88%ID^E:0^RecName: Full=Cytochrome P450 4C1;^Eukaryota; Metazoa; Ecdysozoa; Arthropoda; Hexapoda; Insecta; Pterygota; Neoptera; Polyneoptera; Dictyoptera; Blattodea; Blaberoidea; Blaberidae; Blaberinae; Blaberus	TR78286|c0_g1|m.13811	263-1783[-]	CP4C1_BLADI^CP4C1_BLADI^Q:1-506,H:1-505^57.91%ID^E:0^RecName: Full=Cytochrome P450 4C1;^Eukaryota; Metazoa; Ecdysozoa; Arthropoda; Hexapoda; Insecta; Pterygota; Neoptera; Polyneoptera; Dictyoptera; Blattodea; Blaberoidea; Blaberidae; Blaberinae; Blaberus	PF00067.22^p450^Cytochrome P450^38-502^E:2.8e-122	sigP:1^20^0.713^YES	ExpAA=32.24^PredHel=2^Topology=o4-21i33-55o	0	0	GO:0005789^cellular_component^endoplasmic reticulum membrane`GO:0070330^molecular_function^aromatase activity`GO:0020037^molecular_function^heme binding`GO:0005506^molecular_function^iron ion binding	GO:0005506^molecular_function^iron ion binding`GO:0016705^molecular_function^oxidoreductase activity, acting on paired donors, with incorporation or reduction of molecular oxygen`GO:0020037^molecular_function^heme binding`GO:0055114^biological_process^oxidation-reduction process	TTTTTTTTTTTCTGTTTCTGAGGCTTTTATTAAAAGAAAGCAGTAACAAATTACCTGTTGATAGGTAATATCCATATAAGAACATTACATAGGTATAAAACATGTAAAAATCATGTTCCAGATTCCTCCTGTAGGAAATTCCTTTGCATTTAGCTATAAAATGAAGCTTAATATATATTCAAATGTTGATTGATGAGTGTTCATTTTTAAACATGCTTGTTAGAATAGACTTCTCAAGAATGCATCAAAGTTTTCACATTCATCATCTTGATTTCATCTTGACAAGAACTCCATTTTCTGGCCGCAGAATCAGTTCTCCAATTAGTGTCATCTTTTCTCTATCTTCTACAGATTCTATTTTAAATTTTCTTATTATGTTGGACAAAACAACTTTTTCTT…	MDLLTAVLTLVLILVPLTMFVQKRRKRAEYCKLIDRLPGPAAYPLIGTAWEMLFAERRDIFRMADERGRKYWPLFRTWMGPLAEIHVIKPQHVEIIMSSTDHIEKSLVYRFLHPWLGQGLLTSKGSKWHSHRKMITPTFHFKILETFFEVFEDKSQLLVKKLKDEANGQVFNIHPYVTRCALDVICETAMGTPVNAQEETDSAYVSAVYAMSEITLQRIVRPWLHPDFIYKRTKYGKIYYESLNVLHGFTEKVIRERKASRLNNNKDLNPKDDEEEVFGKKKRVAFLDLLLEASDGGKNLTDLEIREEVDTFMFEGHDTTAASMSWILYLLGLHQDVQEKVAEELFDIFQGSDRPTTMQDIQAMKYLERVIKEGLRLYPSVPFIGRILRKETKIDGYTI…
TR3368|c0_g1	1.32321	1.10004	27.3787	0.000164059	0.00694482	EST6_APIME^EST6_APIME^Q:582-1,H:42-231^43.94%ID^E:8e-42^RecName: Full=Venom carboxylesterase-6;^Eukaryota; Metazoa; Ecdysozoa; Arthropoda; Hexapoda; Insecta; Pterygota; Neoptera; Holometabola; Hymenoptera; Apocrita; Aculeata; Apoidea; Apidae; Apis	TR3368|c0_g1|m.2166	1-585[-]	EST6_APIME^EST6_APIME^Q:2-195,H:42-231^43.94%ID^E:7e-42^RecName: Full=Venom carboxylesterase-6;^Eukaryota; Metazoa; Ecdysozoa; Arthropoda; Hexapoda; Insecta; Pterygota; Neoptera; Holometabola; Hymenoptera; Apocrita; Aculeata; Apoidea; Apidae; Apis	PF00135.28^COesterase^Carboxylesterase family^5-195^E:4.1e-69	0	0	COG2272^Carboxylesterase	KEGG:ame:410928	GO:0005576^cellular_component^extracellular region`GO:0080030^molecular_function^methyl indole-3-acetate esterase activity	0	GAACCGGTGCTTGCTGTACTCCGAGATGGCGTGGAAGTGCGCGCTGGCGGCGCCCGCCTCGTGGCCGAGTAGCGTGATGCTGCCCTCGTTGCCGTCGAAGTACATGGCGTTGCGGCGCACCCAGGTGAGCAGCCGGTGCTGGTCCTTGAGGCCGTAGTTGCCCGGCAGCGCCGCGTGCCCGGCCGCCAGGAAGCCCAAAGGGCCCAGACGGTAGTTGAAGGTTACAAGTACGACGTCGTGGTCCATGAAATTCTCCGGAGACAAGTCTGCCATCTTACTGCTGCCTGTCGTAAAACGGCCACCGTGGATGACAACGATAACATCCTTCCGAAGTTCCATCTCTTCCAGCGTAGGTGTCTCAGAAATCTGATGGGTGAAGATGTTCAAGTAGAGACAGTC…	TSRSGRRFYAYLGIPYAEPPVGPLRFGLPIPPEKWDDVLNATKEGSPCPQLTYPELKYRGKEDCLYLNIFTHQISETPTLEEMELRKDVIVVIHGGRFTTGSSKMADLSPENFMDHDVVLVTFNYRLGPLGFLAAGHAALPGNYGLKDQHRLLTWVRRNAMYFDGNEGSITLLGHEAGAASAHFHAISEYSKHRF
TR26668|c0_g1	1.32303	1.80351	40.3992	2.56318e-05	0.00694482	PSA_MOUSE^PSA_MOUSE^Q:228-73,H:169-220^61.54%ID^E:4e-14^RecName: Full=Puromycin-sensitive aminopeptidase;^Eukaryota; Metazoa; Chordata; Craniata; Vertebrata; Euteleostomi; Mammalia; Eutheria; Euarchontoglires; Glires; Rodentia; Myomorpha; Muroidea; Muridae; Murinae; Mus; Mus	0	0	0	0	0	0	COG0308^aminopeptidase	KEGG:mmu:19155`KO:K08776	GO:0005737^cellular_component^cytoplasm`GO:0005829^cellular_component^cytosol`GO:0005634^cellular_component^nucleus`GO:0004177^molecular_function^aminopeptidase activity`GO:0070006^molecular_function^metalloaminopeptidase activity`GO:0042277^molecular_function^peptide binding`GO:0008270^molecular_function^zinc ion binding`GO:0071456^biological_process^cellular response to hypoxia`GO:0043171^biolo…	0	CGAATCATCCGTAGTCTTTTGCGGCGTCGGCGTCGGCGTGGTTGTTGTTGTTGTTGTTGTTGCGGGAGCCGGAATGGGGTCCATGTTGAAGAGCGCACTGTAGTTCTGAGGAGGGTAAATGACCATACTGAATGTGGCCTTGAGAGCCGGCTCGTCGAAGCACGGGAAGGCTTTGCGGGCGCTGGTCGCTTCGAACTGCGTCGCAGCCAGGTACCTCGTCTCTCCTGCCGCCTCGTACGTG	0
TR29197|c0_g1	1.31906	1.8492	15.2316	0.00183101	0.012465	0	0	0	0	0	0	0	0	0	0	0	CGCACGCGTACTGGTAGCCCACGTCGCACAGGTCCTTGGTCCAGTCGATGTTGAGGACGAGGTAGCGCACGAAGAACCACAGGCCGACGAGGGCGCACAGCGGCTTCACGCAGGCCAGCACCAGCGGCGCCGCCTCTGCGCAGGCGCACGCCACGAGCCGAACGGCCTCCAGGGCCGAAGACATTCCCATGTCAACGCGCATCTTCCCTCTGCGGCTATATACTGAAGAAAATCACATTCGTGGCAAATGGAACGGTGCAGCGCGCGACTCGCCCGTTGTGCCGGCCTGTGCGGTGCCATACCAACGGCAGGACGCTGAAGACGGGGAAGTGAGTGTGAG	0
TR83375|c0_g1	1.31656	0.437174	18.6543	0.000841562	0.00937174	0	0	0	0	0	0	0	0	0	0	0	GTCATATATCAGCCTGGAAAAAAAGCCTTAGATTATGAGATTATGGGTGTTCACCTGCTGTTCCTGTAGTATCACAATGACATTGCTAGAAATAAGAACTATAAATTTAAGAGAGACTTGCAGAACATTTTTCATGCGGTTAAAGCCAGTCAAGAGTTCCAGAAGACTTTACTGAACAAATTAACAACTTTTATCTCTCCTGTTCTCCTTCATGATGGTACCCCTGGAATATGATGACCGAATACATAAGATTATGAATTATGAATAAAACTACAGAAGAACATTTATGTCCTACAATAAAACAAGAAAAAAATCACACTGTGTCACACATTATTGTCAAGTCCACAATTTTGAAAATGAGACAGATAACAGAATGCATTTATTGGGCACTAAATTTAA…	0
TR73331|c0_g2	1.31638	0.814079	8.65954	0.0114767	0.0355233	0	TR73331|c0_g2|m.13054	1257-2330[-]	0	0	0	0	0	0	0	0	TCTAGTACACATTTCAATTTTATTAACAAATTGTACGTGTTTTATTACACGTTTGCACCTTACTCGATACACATTATTGGCTCTCTTACTGAACAATACACCTATTGTTTAGCCATTTTGATTTTCAACAGTAAATCTAAAATCTACTACATAATGGTATTTGCAATTATGTTTCCTTCATGGTTTTACGATTTTGCTGGTAACACGACACATGTAATGTGTAGTTCATTATAATATTAGGAGACATAATACAATGTACAATAGTTATTACTGACATTACAATGATGTATTTTGGGACAGCTGATGCTAATGTTATATTTGCTGCATCTTGGTGCCAGATGGTAGTGGAGTAGACCACAGAAGCTGAGCATCATGACCTGCCCCTTCTTTTTGTGTGGA…	MSTVRVETISNTGANKSVAPKTDEVVQESNKQMSEIFDSDCFPAANAVQLKHILTSESISNVTDHMEEMDVKEFIESDLSVNSEMSLKLMSRVCFDNKKELTSDSAYLEIMDGRNQCAQTVSADVNIVNKKNNVPLEKKSGVNIDTPAVTGSTVSEDTALNCATKAMSPGYDADGENSFLTEKREKTILKLRSPCIVSSRQSQNSDLDNSESEITVVNCLSEDDDIEIIEDCSPVQFLGYKFAKVGVATKTTSRSRHISVVAPADSFTKHLSSKSEDISCVNDTQEAKGQVMMLRRFTLMVMFIVPSVTTQHKFYVLGVTLHVTAVLIARQGTGEKSIMKNANNKMLLETTKFIDAE*
TR55943|c3_g2	1.31596	6.31934	8.08171	0.0138966	0.0406422	TRY1_ANOGA^TRY1_ANOGA^Q:1833-2153,H:185-274^47.66%ID^E:2e-22^RecName: Full=Trypsin-1;^Eukaryota; Metazoa; Ecdysozoa; Arthropoda; Hexapoda; Insecta; Pterygota; Neoptera; Holometabola; Diptera; Nematocera; Culicoidea; Culicidae; Anophelinae; Anopheles	TR55943|c3_g2|m.8238	322-621[-]	0	0	0	0	0	0	0	0	AGAGTACATGGGGACTCCCGGAGAGAGCGTGATCACTCCCGGAGAGATGTTTCGTACAGCGCTTGTTGTGCTCCTGGTGGTGGCCCTCAGTGGCGCCAGTCCCCTGGTGAAACCCATCCAGGCTGGGAGGCTCTCCTGCAGAGATGTCGCCGACTGGTTTAGCTGTGCTCCTGGTGGTGGCCCTCTGTGGCGCCACCCCCGTGGTGAGACCTATCCCAGGGAGGCCACGTGTGGGTGGCCGTATTGTCGGCGGCTCCGCAGTCAGCATCTCCCAGTACCCGTGAAGGCGCTCCTGCAGAGATGTTGCGAACTGGTTTGGTCCTACTCCTGGTGGCGGCCCTCTGTGGCGCCTCTACGTCTCCCCTGGTGAAACCCATCCAGGGGAGCAAGCCCTGGAGG…	MQTCINWDFVQVLDVRGATHVVALAVYTVGRRQSPGVADDRGATHVVAHGEVELPRVLGDADSGTTDDPTIQTRPPGLAPLDGFHQGRRRGATEGRHQE*
TR47569|c0_g1	1.31443	0.405792	28.3102	0.000140897	0.00694482	0	0	0	0	0	0	0	0	0	0	0	CTTGAATGTTCCTGTCCATGAGTACATGGGGTCTTCCTGGTCTGTTTAGCTGTGGTTGTTCATCACCAATGGTCGACTTGTGCAGCTTTAGAAAGGTTGAAACATCCATGATGGATTTGTTATTCACATGACATCCACTGATTAGTTCACTTTCAAAAACACTGAGCTATCTTCGTGGAAACATTTGCTGTTCCTGCGCATCTACTGACAACACACCACCTCCTGCCGCCTTTTATATTGGCAGTTCTGCCTCTCGTGATGTGTAGTGGTTAATTATACATTATGTAGAGATGTCTGGATACTTTTGATCAGATAATTTTACTTCCACCTAATATACCCCATGGCTTCAACCATAGATGAAAATTATGAAAACTTAAGGTTTTTCCACTTAGTGGTGGA…	0
TR105262|c0_g1	1.30742	0.688584	7.28813	0.0182645	0.0489274	0	0	0	0	0	0	0	0	0	0	0	CTCATCCCTTCAGAGACTAACGAGTATGTGAATTCCCAGCACATTTCTTGTGAGCGACTAGAGTACTCTGAAGTTGGCTAGCAACACAATTCCAGCCGATAAACAAGGTCAGACACGAGATGGGGCAGAAGGGATTTTTACCTAGATGTGATAGCACTCGGAGACTTGATATCAGGTTTTGTAACGTGAGTCGCAAATCGTCATGGACATGTTGTTTGTACTATCAGTTATTAACCCTGTTACACTGAGTGTAGAGGCTTTACAGTTGTGGCACCGCTAGGGTAAGACGTCTCCTTTACTCCTTCTTCGTTGTTTTCTTTTTCTTCTGTTGGTGTGACGCAGAGGTTCTTGCTGTGATTAGCCTGTAAAGTGTCCTGAGAGCCACGACAGCGACAATAAG	0
TR68929|c0_g1	1.30502	6.03146	8.18643	0.0134169	0.0396581	VDP_BOMMO^VDP_BOMMO^Q:3119-2445,H:24-252^43.67%ID^E:2e-55^RecName: Full=Vitellin-degrading protease;^Eukaryota; Metazoa; Ecdysozoa; Arthropoda; Hexapoda; Insecta; Pterygota; Neoptera; Holometabola; Lepidoptera; Glossata; Ditrysia; Bombycoidea; Bombycidae; Bombycinae; Bombyx	TR68929|c0_g1|m.11633	2436-3131[-]	VDP_BOMMO^VDP_BOMMO^Q:5-229,H:24-252^43.67%ID^E:5e-61^RecName: Full=Vitellin-degrading protease;^Eukaryota; Metazoa; Ecdysozoa; Arthropoda; Hexapoda; Insecta; Pterygota; Neoptera; Holometabola; Lepidoptera; Glossata; Ditrysia; Bombycoidea; Bombycidae; Bombycinae; Bombyx	PF00089.26^Trypsin^Trypsin^9-225^E:1.4e-57	0	0	COG1819^Transferase`COG5640^protease	KEGG:bmor:692746`KO:K01312	GO:0004252^molecular_function^serine-type endopeptidase activity	GO:0004252^molecular_function^serine-type endopeptidase activity`GO:0006508^biological_process^proteolysis	TTTTTTTTTTTTTTTTTTTTTTTAAAATTTTTCATTTTTATTTTATATACAGCACTTTTCTCATACAGAAATTTTTTTTTTTTTTTTTTTTTTTAAAATCTTTCATTTTTATTTTATACACAGCACTTTTCTCATACAGAAAAAATTACACTATTACAGTAAATTTTTTTTTTTTTTTTTTAAAATCTTTCATTTTTATTTTATACACAGCACTTTTCTCATACAGAAAAATTACACTATTACAGTAAAAAAACTATCTTCTGATGTATTCAATTATTTTCTTTATAATTCTAATAATGTAAAATGAAAGAATGCAATGGCATTTGTTTTTAAATAAGGGAAGATATAGGTACAAAAAATTACAGTTATTAAGACTATCAAGACAAAAATGTGAACTAC…	PTLGGDDRILGGEPADISQFPWQVSVEYVEAHRCGASIVSANWVMTAAWCIWGTEPMYYVLRVGTSIRESGGATYTVSDLFWHEDFDYVLTDRDIGFFEVSGSISFDDNVQAVALATEELEAGTTVTVSGWGSLQPGVDYPEQLHAVNTTIIDRSSCNDTYEGIVTENMICAGEPEGGKDACNGDKGGPLVVNSTQYGIVSWGYGCFYPPYPGVYTNIVSLRSWINETIGV*
TR56571|c0_g2	1.30401	7.54942	18.0387	0.000961217	0.00981187	PE1_ANOGA^PE1_ANOGA^Q:734-1033,H:34-152^33.33%ID^E:1e-11^RecName: Full=Peritrophin-1;^Eukaryota; Metazoa; Ecdysozoa; Arthropoda; Hexapoda; Insecta; Pterygota; Neoptera; Holometabola; Diptera; Nematocera; Culicoidea; Culicidae; Anophelinae; Anopheles`PE1_ANOGA^PE1_ANOGA^Q:166-543,H:48-151^33.33%ID^E:3e-10^RecName: Full=Peritrophin-1;^Eukaryota; Metazoa; Ecdysozoa; Arthropoda; Hexapoda; Insecta; Pt…	TR56571|c0_g2|m.8319	88-606[+]	PE1_ANOGA^PE1_ANOGA^Q:27-154,H:48-153^32.81%ID^E:3e-12^RecName: Full=Peritrophin-1;^Eukaryota; Metazoa; Ecdysozoa; Arthropoda; Hexapoda; Insecta; Pterygota; Neoptera; Holometabola; Diptera; Nematocera; Culicoidea; Culicidae; Anophelinae; Anopheles	PF01607.24^CBM_14^Chitin binding Peritrophin-A domain^19-56^E:1.2e-08`PF01607.24^CBM_14^Chitin binding Peritrophin-A domain^107-152^E:1e-10	0	0	0	KEGG:aga:AgaP_AGAP006795	GO:0005576^cellular_component^extracellular region`GO:0008061^molecular_function^chitin binding`GO:0006030^biological_process^chitin metabolic process	GO:0008061^molecular_function^chitin binding`GO:0006030^biological_process^chitin metabolic process`GO:0005576^cellular_component^extracellular region	GTGACGAGAACGGCGTTGCCTGGGTCATTGAATGCCCAGCTGGTCTTGAATACAATGCAGAGCTGAGAGTGTGTGATTACCCAGAAAATGCTGGTTGCTCATCGTCTTCACCAAGCAAACCGTCTGATGATACACCTTCTCAGGGGGTTCTACAAGTGTGACGAGAATGGCGTTGCTTGGGTCATTTCATGCCCATCCGGTCTCGAATACAATGCAGAGCTTAAAGTGTGTGATTACCCAGAAAATGCTGGTTGCTCATCGTCTTCACCAAGCAAACCGTCTGATGATACACCTTCTCAGGGGGTTGAAGACGACGAAAATTCTGATGCAGGTAATGAGGTAAGCCCGAATCCACCAGCTGTAGATGCTCCTACTTGTCCAGCGTGGAATCCAAATGAT…	MLVAHRLHQANRLMIHLLRGFYKCDENGVAWVISCPSGLEYNAELKVCDYPENAGCSSSSPSKPSDDTPSQGVEDDENSDAGNEVSPNPPAVDAPTCPAWNPNDVTQLPNPSDCSSFYKCDENGVAWLIPCPAGLEYNAKLRVCDYPESAGCSSSPTECWLLIVSFSKQPIW*
TR86822|c0_g1	1.30183	5.55201	9.75861	0.00810489	0.0282506	PE1_ANOGA^PE1_ANOGA^Q:3-230,H:82-151^32.47%ID^E:1e-06^RecName: Full=Peritrophin-1;^Eukaryota; Metazoa; Ecdysozoa; Arthropoda; Hexapoda; Insecta; Pterygota; Neoptera; Holometabola; Diptera; Nematocera; Culicoidea; Culicidae; Anophelinae; Anopheles`PE1_ANOGA^PE1_ANOGA^Q:105-233,H:36-78^46.51%ID^E:3e-06^RecName: Full=Peritrophin-1;^Eukaryota; Metazoa; Ecdysozoa; Arthropoda; Hexapoda; Insecta; Pteryg…	0	0	0	0	0	0	0	KEGG:aga:AgaP_AGAP006795	GO:0005576^cellular_component^extracellular region`GO:0008061^molecular_function^chitin binding`GO:0006030^biological_process^chitin metabolic process	0	CAGCTCCAAGTTCCACAGCTAAACCTGCTCCATCAGGAGACTGCCCAGCTGTCGGAACATGTCCACAGAATGAAGATGAGAATTCTATTGCTAAGCACGTTCCTCATGCCTCAAACTGCAGCCAGTTCTGCAAATGTGACCATGGTAAACCCGTGACCTTCGACTGTCCTGCTGGACTTCATTTCAACCCTACCCTGGAGGTGTGTGACTGGCCAGCAAATGCAGGTTGCGCAGGTG	0
TR5278|c0_g1	1.29798	1.76223	20.124	0.000619377	0.00861572	0	0	0	0	0	0	0	0	0	0	0	TTGTTTGCGAAACTGGCTTTAATTCAAAGTTCAGTGATACATTTGATGTAAGTATATGTGTTATATATTGTATTTGTTGTAAGTAGCTATGAATAGCAATTACTGATAATCACTAGGTACATGTGCTGTTGCATTAAATCGTTCCTTTATATTTTACTACATTTTCTAAATTTGGTCAAAATACGTAACAGTCATTTCGAAACAATTTCAGTTGTGTTGAGTAAAACTCTTAAGGCGTCTCTGTGTAGGCTTATCAATTCAATTCAAACAAAAAGAGTAGAATATGTCCAACATTATAATTATTTTAATGAAATTGCAAACTATCATGTTCCGAAAGTAAAATTTTGAAGACAGTTGTTAACGAAATATGTGAGCCCAGTTGTGCACTGCAG	0
TR20224|c0_g1	1.29768	2.05934	13.1326	0.00310814	0.0160894	ACES_MOUSE^ACES_MOUSE^Q:887-177,H:335-568^26.32%ID^E:2e-10^RecName: Full=Acetylcholinesterase;^Eukaryota; Metazoa; Chordata; Craniata; Vertebrata; Euteleostomi; Mammalia; Eutheria; Euarchontoglires; Glires; Rodentia; Myomorpha; Muroidea; Muridae; Murinae; Mus; Mus	TR20224|c0_g1|m.1755	162-893[-]	ACES_MOUSE^ACES_MOUSE^Q:3-239,H:335-568^26.32%ID^E:5e-11^RecName: Full=Acetylcholinesterase;^Eukaryota; Metazoa; Chordata; Craniata; Vertebrata; Euteleostomi; Mammalia; Eutheria; Euarchontoglires; Glires; Rodentia; Myomorpha; Muroidea; Muridae; Murinae; Mus; Mus	PF00135.28^COesterase^Carboxylesterase family^2-223^E:6.7e-29	0	0	COG2272^Carboxylesterase	KEGG:mmu:11423`KO:K01049	GO:0031225^cellular_component^anchored component of membrane`GO:0030424^cellular_component^axon`GO:0005604^cellular_component^basement membrane`GO:0030054^cellular_component^cell junction`GO:0009986^cellular_component^cell surface`GO:0005737^cellular_component^cytoplasm`GO:0030425^cellular_component^dendrite`GO:0005788^cellular_component^endoplasmic reticulum lumen`GO:0005576^cellular_component^e…	0	GTCGAAACCTAAGAGTGCTATGTGATAGACAAGTGACGCAACACATTATTTATTTATCTGGAAAGAAAAACAGTTTTGCACAGTGTTGCTGAAAGACAGAGAGGAAGAGCTCTAATTGAATGCAGTCGATCAGTCACGGAGCAACAGTGTGCCACCCGGCGTCAGGGCCAGGTGAGTGGCAGCAGCGAGTGCATGAAGTCCATCCTGCCGCCGTAAACGTCCCGGGCGGCCGCCATGGCCGCCTCGATGACCAGGTAGTTGCGCTCGGCGTCGCTGTTGTACGGCTGCCACGTCACGCCACCCACGGGCGTCGGCGTAGGGTTCCCTGTCTTGGCAAAATTTGTCCACATGTTGATCATGTTTGTCCTAGTGATGTCTTCGTCAGATGTCTTGTTCAGG…	PYEGAFLNETPYTILAEARANRVPLIAGDTSAECLGTVLGKNIFGSNESMAAFDAGFVDSISLDIRVGDEQYRREAAQKIRSFYFGDEPIDSEDFYPLVALISDLYYIEPVDMVVRTWVNQSSEIPVYEYQFDYKDENSLLGWFEGVTHGMELGLIFYQPYRNPNLNKTSDEDITRTNMINMWTNFAKTGNPTPTPVGGVTWQPYNSDAERNYLVIEAAMAAARDVYGGRMDFMHSLLPLTWP*
TR52392|c0_g1	1.29688	6.49229	33.8377	6.10977e-05	0.00694482	CTNS_DROME^CTNS_DROME^Q:1988-1140,H:88-371^62.68%ID^E:2e-119^RecName: Full=Cystinosin homolog;^Eukaryota; Metazoa; Ecdysozoa; Arthropoda; Hexapoda; Insecta; Pterygota; Neoptera; Holometabola; Diptera; Brachycera; Muscomorpha; Ephydroidea; Drosophilidae; Drosophila; Sophophora	TR52392|c0_g1|m.6990	1122-2021[-]	CTNS_DROME^CTNS_DROME^Q:12-294,H:88-371^62.68%ID^E:6e-125^RecName: Full=Cystinosin homolog;^Eukaryota; Metazoa; Ecdysozoa; Arthropoda; Hexapoda; Insecta; Pterygota; Neoptera; Holometabola; Diptera; Brachycera; Muscomorpha; Ephydroidea; Drosophilidae; Drosophila; Sophophora	PF04193.14^PQ-loop^PQ loop repeat^55-111^E:3.3e-18`PF04193.14^PQ-loop^PQ loop repeat^194-250^E:2e-20	0	ExpAA=151.66^PredHel=7^Topology=o56-78i90-112o132-154i167-189o193-210i223-245o265-284i	ENOG410XQSD^cystinosin	KEGG:dme:Dmel_CG17119`KO:K12386	GO:0016021^cellular_component^integral component of membrane`GO:0005765^cellular_component^lysosomal membrane`GO:0005774^cellular_component^vacuolar membrane`GO:0015171^molecular_function^amino acid transmembrane transporter activity`GO:0015184^molecular_function^L-cystine transmembrane transporter activity`GO:0003333^biological_process^amino acid transmembrane transport`GO:0015811^biological_pro…	0	TTATTTTAAAGCACAACATGGTGCATAGTAATGCTTATACAAGAAGTAAGTAACTGATATTTACTGTAGTTGTAGGCATTAAAAATCATGAAATATTCACGTATAAAATATTTTGAGAGATCACAGCAATTAAATAATTCACATCACATTAGACACTTGCAATACTTCTTGAGAGTCATCATAAGTGCAGTTAGAATTTGCATTAATACTGAGATTAATTCAAAATTAATCATGATCAAGCAAGTAAAACTAAAATGATCACACCTCGAATTTATGAGCTAGTGCACTCTCATGCACTAATTGGTTCAGTACTGGATGAGGTGGTGGTGGTCCCGGCCACGACTTCATATCCACGGGTTCGGTAAAGCACATAGTGCTGTATACACACACACACACAAA…	TVIEGNVSEAWTVNVTAVDVGRALVAANTSSSLIDVTEAFVRLTIQHSDFLYHASIVVGWVYFAAWSISFYPQIYINWKRKSVVGLNFDFLSLNILGFILYSLFNCGLYWIPEVEEEYFKLYPKGLNPVQVNDIVFALHASFATFITIVQCFIYERGDQTVSITARVIHGIFALFLFISVILAATLVITWLDFLYYCSYVKLAITLIKYVPQAYMNYKRKSTVGWSIGNILLDFTGGMLSMLQMIFNAYNYNDWNSIFGDPTKFGLGLFSVIFDIFFIIQHYVLYRDRKQTSESIKEPI*
TR77389|c0_g2	1.29432	3.2391	16.971	0.00121879	0.010687	FABPM_SCHGR^FABPM_SCHGR^Q:81-488,H:1-133^41.3%ID^E:3e-19^RecName: Full=Fatty acid-binding protein, muscle;^Eukaryota; Metazoa; Ecdysozoa; Arthropoda; Hexapoda; Insecta; Pterygota; Neoptera; Polyneoptera; Orthoptera; Caelifera; Acrididea; Acridomorpha; Acridoidea; Acrididae; Cyrtacanthacridinae; Schistocerca	TR77389|c0_g2|m.13641	81-494[+]	FABPM_SCHGR^FABPM_SCHGR^Q:1-136,H:1-133^41.3%ID^E:8e-20^RecName: Full=Fatty acid-binding protein, muscle;^Eukaryota; Metazoa; Ecdysozoa; Arthropoda; Hexapoda; Insecta; Pterygota; Neoptera; Polyneoptera; Orthoptera; Caelifera; Acrididea; Acridomorpha; Acridoidea; Acrididae; Cyrtacanthacridinae; Schistocerca	0	0	0	0	0	GO:0005737^cellular_component^cytoplasm`GO:0008289^molecular_function^lipid binding	0	AAGTGCTTCTGCTCTACCACAAGACATTAGGACTTCTGAAGTCACAGAACCGCAACAGACATCCGTAGACCGCCTGCAAAATGGTGAAGCAGTTCTCTGGGAAGACCTACGAGCTGGACCTGGATAGCCAGCAGAATACTGAGGCCATGTTTGAGGTGTACGGTGTGACAGACCCAGCCCACAAGCAGGTAGCCCTGAAGACGAAGTCTCGGGTGACACTGATTGTGGACGGCGACAAGTACACAGAGACCACCCAAACAGGGGACCACAAGACCAGCTCCACGTTCCGCCTGGGAGAGGAGTTTGCAGAGGAGTCCCTGGGTCGCAAGTGGAAGAGCACCGTCTCCTTGAAGGACGACCACACGCTGCTCAAAGTCGAGAAGGGCGAGGATGGCAAGA…	MVKQFSGKTYELDLDSQQNTEAMFEVYGVTDPAHKQVALKTKSRVTLIVDGDKYTETTQTGDHKTSSTFRLGEEFAEESLGRKWKSTVSLKDDHTLLKVEKGEDGKTVTLEKSFSAQQLVVTYSFGSVTAKRIYKAV*
TR57554|c0_g1	1.29343	1.99377	26.0461	0.000205293	0.00696612	0	0	0	0	0	0	0	0	0	0	0	AAAACATACAGTAGCAAATCGCACAGTGTTGTGTTCTGCACCACATGTAAAGTACTGTACGTACATGGTCCACTCCTGAAAGGTATACTTTCATCAAAATAGTAAGTACAAACATTGAGCAAAATTACATGAAAAGCCCATTATATTTTAATACATTTATGTCTTGAAAACTGTAACTTTTTTGAAACGACGGTGTAGTCTAGTAAAAACAGCCACTGCGATGTTACTGGAAAGTAACACCAGGATGTCAGGAGACAGCTGCTTATAAACTACAAGACATACAGATAATAGACACATATCAGTGGATGGAACGTCTCTCCAAGCTTAGCTTCGCAATACACGCCGTGGCGTGATTGCAGAACGCGCCACTAGAGGGCAGCGGAGTCCGAAAATGGTGTA…	0
TR40209|c0_g1	1.2904	1.33368	24.0979	0.000289177	0.00720487	0	0	0	0	0	0	0	0	0	0	0	CTCTCGGCAATCTATTACAAAAATATTGCCTAATTAAATTAAGCATTACACAGAGAGAAGAAATTTACTGTGCTGTATAAATCAGAGAGATGAAGTCAGTTACTGTGTATGTCAATTACTGCTCGAGTGTCAGCTACTGAAGAAACCTGTATTCATTTCTGTTCCACTGCAATACATTATGATGCTGCTTCATTAAATCAAACAGTACAATGACAGACACGAAATTACTGAACTGTATGAACCGGAGATATGAAATTTAATGATGATGTTGAAGAGGAAGAGGAGGAGGCAGATACGGCAACACTGTGCGTAATATTTTTATGCTGTTTGCATACATGTGAGACGAAATTTTATGAGAAGGCAATACAATTTTTCAGAGATGGAGCACTATGCAATGTG…	0
TR90761|c0_g1	1.29013	3.20932	37.5021	3.70767e-05	0.00694482	0	0	0	0	0	0	0	0	0	0	0	GTGTGTGTGTGTGTGTGTGTGTGTGTGTGTGTGTGTGTGTGTGTGTGTGTGTGTGTGTGACGCAAAAGCTGTGGAGAGTAGCGTGCTTCACCAGAATCTCACCTGCCTGCTGCTGCCTCCTCACCATAATGATCGTCTCAAGTTCAACCTCTCTGCAGAGTAACCGGGCATAGCCAGTTTCATTGGCTATCTCGTGTTAATAGATAATGCAGACTCCCTCCACTTCAATAGTACTTTATTGTGTGACAGTACTTTATTGTGTGGCAGTACTTGAACTCAGTTGTAGGCAGCAGACACTTGGCCTCTGTTATTTACGAGTGCTGCTGCACCTGCACTGTACAGTCTGCCATATTTTGTGCTGACATTTGGAACAAACTGTAACTATCAGCAATTCTTGAG…	0
TR28030|c0_g1	1.28903	3.2328	19.2116	0.000747896	0.00905847	0	0	0	0	0	0	0	0	0	0	0	AGAGTATATTTTTCCTAATAGCTGTAGCTTATGATTGCTTCAAGCGAGGTAAGCTGTGTTGCTCATTGAAATTTTCTATGATCTAGATGCTTCATCCCTTCGATAAGCATAATTTTATTAATTTATCTTTAACCGAATGTGTCAAAAGCTACACAGAGTGTAATGTTGCTGCTTTGATATGTTGTGTCACTTAGATAAATCATCTGTACCACAAAAATTTCTACGTTTTTAACTGGTGTTGCTTTCGTGTTAGACTCGTCGTCTGA	0
TR92290|c0_g1	1.28767	3.12971	24.948	0.000248461	0.00704774	SL172_CAEEL^SL172_CAEEL^Q:1661-735,H:178-487^35.14%ID^E:3e-46^RecName: Full=Uncharacterized transporter slc-17.2 {ECO:0000305};^Eukaryota; Metazoa; Ecdysozoa; Nematoda; Chromadorea; Rhabditida; Rhabditina; Rhabditomorpha; Rhabditoidea; Rhabditidae; Peloderinae; Caenorhabditis	TR92290|c0_g1|m.17922	663-1661[-]	SL172_CAEEL^SL172_CAEEL^Q:1-309,H:178-487^35.14%ID^E:9e-59^RecName: Full=Uncharacterized transporter slc-17.2 {ECO:0000305};^Eukaryota; Metazoa; Ecdysozoa; Nematoda; Chromadorea; Rhabditida; Rhabditina; Rhabditomorpha; Rhabditoidea; Rhabditidae; Peloderinae; Caenorhabditis	PF07690.16^MFS_1^Major Facilitator Superfamily^1-244^E:5.8e-20	0	ExpAA=151.05^PredHel=7^Topology=i5-24o28-50i95-117o132-154i167-186o196-218i259-281o	ENOG410XPWC^solute carrier family 17	KEGG:cel:CELE_C38C10.2`KO:K08193	GO:0016021^cellular_component^integral component of membrane`GO:0015293^molecular_function^symporter activity`GO:0006814^biological_process^sodium ion transport	GO:0055085^biological_process^transmembrane transport`GO:0016021^cellular_component^integral component of membrane	TTTTTTTTTTTTTTTTTTTTTTTTTTTTTTTTTTTTTTTTTTTTTTTTTTTTTTTTGACAGAGGAAAGAATAGCAAACGTTTATTACTCTACAAAATAACAGTTATAAGAATATTTGCAGAGTTCATTGATGCCACAATGTGCATGTTTTATCGCGAATGTATGGTCAGCACTACGAGATGTACTGCTGCTCCCCTCCTGTCCTTGTCCTTCTTCTCTCAACTGGTAAGCTGATCCTTTTAATCACTGTGAGGAAAGGAAGATGGGTACTCTTACACTGCAACCTCCAGTTATGAAGTCAGGAAAGGCTATGTTTCCTGCAATAAAATCTTGTAGGTAAAAATTTCAGTTCAGTTTATTACTGATCGTGACGCACGTTATGCAAACTTCAGTTTTAACG…	YTGFPLANVVIFPLSGVLCQATALGGWPSIFYVTGAFGFVCSVVCWFLVYENANEHPRISAEEREYLNAVAVKETGKPPSIPWGSVLRSGPVMAYLVAHFCYSWGFVTLAVNLPLFMKEVLFFDLHQNGMLSALPYLGVLVVRIIVSLTFTGCQKRTGLSLTNLRKLNHTVGTLGAAASLLGVASLSCQQQFWAVLALAAGQAVTDLAFTGGYVLSFLDLAPRLAGTLTGAANALGNLPGVLAPTMVGHLTTNGTREEWTVVLYVTAAFYVVGAAVYLVLGSSEQQPWAPGDANSPADIEMEPLQLPEKAPHPRTDVNSNGIPQQPTTTKLL*
TR11623|c0_g1	1.28615	0.810526	8.41156	0.0124494	0.0376281	0	TR11623|c0_g1|m.1604	2-391[-]	0	0	0	0	0	0	0	0	GTTTGCTCCTCTTATGGTGATGCTTTCTCTCACCAACCATGCGACGTATATTCATATGCATACGATAATTGACTTGAGTAGATAGATCACGGTCATTAACTGCATGCCTGCTATAGCTAAGTCGGCGATGCCTTCTGTAAGGTTTGCATAATTCTTCTGCCAGCAAATGGTGTATTTTAGCATCAGTAAGATCTTTTTTGGAGGGGTTATATTCCAGTTCCTGCATATCTATGTTCCATGTACTTGAGTCAAGATGATTGAAACTTCCATTAAAGTTAGTACTCATATTTCCATTTATATTCCCACTAGTGAAATTTCTAAATATTGCTGACATAGATTCTGTGCCAGAAATATTGCCAACAGTTGATGCATTTCGACGCATATACTCCATGGCATCTT…	MEYMRRNASTVGNISGTESMSAIFRNFTSGNINGNMSTNFNGSFNHLDSSTWNIDMQELEYNPSKKDLTDAKIHHLLAEELCKPYRRHRRLSYSRHAVNDRDLSTQVNYRMHMNIRRMVGERKHHHKRSK
TR68798|c0_g3	1.28238	0.525739	10.1725	0.0071457	0.026127	0	0	0	0	0	0	0	0	0	0	0	CTCCAGCATCACCTCCATCACCACCATCTCCACCATCACCTCCGTCTCCAGCATCGCCTCCATCTCCACCATCGCCTCCATCTCCACCATCACCTCCATCTCCAGCATCGCCTCCATCTCCACCATCGCCTCCTTCTCCACCATCACCTCCGTCTCCACCATCACCTCCATTTCCACCATCACCTCCATCACCAGCATCGCCACCATCTCCACCATCGCCTCCATC	0
TR79410|c0_g2	1.27966	5.34319	39.377	2.91275e-05	0.00694482	AMPN_PLUXY^AMPN_PLUXY^Q:5-376,H:740-872^32.33%ID^E:7e-18^RecName: Full=Aminopeptidase N;^Eukaryota; Metazoa; Ecdysozoa; Arthropoda; Hexapoda; Insecta; Pterygota; Neoptera; Holometabola; Lepidoptera; Glossata; Ditrysia; Yponomeutoidea; Plutellidae; Plutella	TR79410|c0_g2|m.14136	2-472[+]	AMPN_PLUXY^AMPN_PLUXY^Q:2-153,H:740-905^30.36%ID^E:1e-20^RecName: Full=Aminopeptidase N;^Eukaryota; Metazoa; Ecdysozoa; Arthropoda; Hexapoda; Insecta; Pterygota; Neoptera; Holometabola; Lepidoptera; Glossata; Ditrysia; Yponomeutoidea; Plutellidae; Plutella	PF11838.8^ERAP1_C^ERAP1-like C-terminal domain^3-144^E:1.8e-21	0	0	0	0	GO:0031225^cellular_component^anchored component of membrane`GO:0005886^cellular_component^plasma membrane`GO:0004177^molecular_function^aminopeptidase activity`GO:0008237^molecular_function^metallopeptidase activity`GO:0008270^molecular_function^zinc ion binding	0	CAGCAGCGTCGCTGCCGACGTGCGCAGCGTGGTGTACTGCAACGGCGTGCGGCGCGGCAGTGCAGACGACTGGCAGAGGCTGTGGGAGCACTACCTTGCTACCAACGTCGCCTCCGAGAAGACAATAGTCATCGCCGCACTCGGCTGTTCCAGCAACGTCACAGTCCTCGAGGAGTACCTGGCGACGACGTCTGATGGCAGCATGGACATCAGGAGCCAAGACTACTCAGCGGTGTATTCAGCCGTCTACAGCAACCCCACCGGCTACCAGGCCGCCATCAACTACGTCACCAACAACAAAGGCGTCAGTGGTGCGTCTACAATCCTGGCTGGGCTCGCGTCAAAGGTTACTTCCCAAGAGCACGTGCAAAAGCTGGTGGATGTGGCGACAGCAGCGGA…	SSVAADVRSVVYCNGVRRGSADDWQRLWEHYLATNVASEKTIVIAALGCSSNVTVLEEYLATTSDGSMDIRSQDYSAVYSAVYSNPTGYQAAINYVTNNKGVSGASTILAGLASKVTSQEHVQKLVDVATAAELSESAIASLEQSTAEHVQWNQRYE
TR68719|c1_g1	1.27657	1.43623	19.5689	0.000694209	0.00885176	0	0	0	0	0	0	0	0	0	0	0	GGGACTTAACATCTGAGGTCATCAGTCCCCTAGACTTAAAACTACTTAAACCTAACTAACCTAAGGACATCACACACATCCGTGCCCGAGGCAGGATTCGAACCTGCGACCGTAGCAGTCGCACGGTTCCTGACTGCGCGCCTAGGACCGCGAGACCACCGCGGCCGGCTCTGAAAACCAACTTACACGTTTAAAATAGCAGCAAAACTGGTAACTTTATTCCCTTAACACAAACCAGTTGTTAAGAGACTGGTTGTTTTTAATACCACACCTAGATGTCAGACTTAAACTCATTGTGACCATAAGGGAAATGGTCTACAAAAATCACTGCATTGCAAATACAAACAGTGGTTCTACTTTGCCGCAAAATTCGATATTCTTCATATTTTCAGACTGTCA…	0
TR11070|c0_g1	1.27108	1.59712	18.1723	0.000933666	0.00971984	0	0	0	0	0	0	0	0	0	0	0	GCAGCCACAGTCCAGCGACAGACGATCGTCTCGGGGCATCGGCCGGCTTCAAACTTTAAGTGACTCCAAAGACCGCCATCTGGCAGTAAACTGAACAGGGCAATGGCAGCAACAGCGAAGCACAGTTTCGTGAATGAGCTGGGCCACAGTCCTGCAGTAAAGCCTGGGATGGTCCGCCGCGGCTCAGTGATTTTCCAGCAGTCTGGGGAACACCACACCCACACCCACACCCACACCCAGGACGTGGG	0
TR55544|c0_g1	1.26999	3.71625	19.7439	0.000669539	0.00873731	0	0	0	0	0	0	0	0	0	0	0	GTTCAAGGTAGTTTCATAAAATACTCATATTGTTATAATGGTTCAAAACTTTAAACATTTACTTCTGTCATCACTTGACACAAGAACATTCTATTTTTTGTTCAGCTGATGATCCCTTCAGAGTACTGCAATTTTTTGCCTAGCAACATGACATCATATGATAAAAATGCTTCATTTAGAGAACATATTTTCATCGTAAATTTGTAACATAGTGGAGCATGTTAAATATCCCAGAGTTTAGAGTAATATTTATAGCATTTAAAAAAACAGAATTCAATAATTTTTTTATTTATTGTATATAATAATTTCTGAAATGATAGAGTTGCATGTAATGGTAGTTTTTTTGAGAATGAAATAAAGTAACTACAGAAAATGTCATGCCATGCCTATGTAATATAC…	0
TR100031|c0_g1	1.26985	2.65854	30.1692	0.000105079	0.00694482	NAGK_MOUSE^NAGK_MOUSE^Q:1748-726,H:1-341^47.8%ID^E:7e-96^RecName: Full=N-acetyl-D-glucosamine kinase;^Eukaryota; Metazoa; Chordata; Craniata; Vertebrata; Euteleostomi; Mammalia; Eutheria; Euarchontoglires; Glires; Rodentia; Myomorpha; Muroidea; Muridae; Murinae; Mus; Mus	TR100031|c0_g1|m.9	678-1748[-]	NAGK_MOUSE^NAGK_MOUSE^Q:1-341,H:1-341^47.8%ID^E:5e-108^RecName: Full=N-acetyl-D-glucosamine kinase;^Eukaryota; Metazoa; Chordata; Craniata; Vertebrata; Euteleostomi; Mammalia; Eutheria; Euarchontoglires; Glires; Rodentia; Myomorpha; Muroidea; Muridae; Murinae; Mus; Mus	PF01869.20^BcrAD_BadFG^BadF/BadG/BcrA/BcrD ATPase family^7-272^E:5.1e-17	0	0	COG2971^BadF BadG BcrA BcrD	KEGG:mmu:56174`KO:K00884	GO:0005524^molecular_function^ATP binding`GO:0045127^molecular_function^N-acetylglucosamine kinase activity`GO:0009384^molecular_function^N-acylmannosamine kinase activity`GO:0006044^biological_process^N-acetylglucosamine metabolic process`GO:0019262^biological_process^N-acetylneuraminate catabolic process	0	AAAAACCATCCACAGACTGGCTGGCTCTCCGGACCTCGACACAAGTCCGCCAGGCGGATTCATGCCGGGGACCAGGCACTCCTTACAACTCCGGAAAGCAGTGCGTTAGACCGCTCGGCTAACCGGGTGGGCTAGAAAAAGTAAGTAATCATTTTAAGGATGATGGGTATAGCCTATAATTGGCAGACAACATTTTAGGAATAATCAGCTAGTGGAAAATCACCATATCTGCACATGGCTGTCTGCAGCAAGATCTATCTGAATTTTAGACCACAATATAGAAAAACATCAATCTTTATTAAAAGTAATTTTAAATGTTATTTTATTATTCCTTAAAGAAATTTTGTTGTGGATTATCTCACATAACACCCAGTTTCACCTTTTGTGTGGAATATAGAA…	MDVILGGIEGGATHSKIVLYNGQGEKLAECGGPGVNHWLFGMAECEKRINGMVEEAKAAAKLPIDKPLASLGMSLSGCEQEETNKQLEDELHELYPNLSSHYVVCSDTVGSIAAAHRHGGMVLIAGTGSNALLLNPDGTQSRCGGWGNMLGDEGSAFWVSHKAVKIYFDDEDNLAKAPYDTSIVWQTIKDHFQVSNRFDLLEHCYSKFHKPKFAALCKKLAEEAKAGDPLCLWLFEQTGRALATMVRALVPAAHKDLFLADSGLPVVCVGSVWLSWDLLKNGFISRLQEPPQNEGDQPVCELSLLKLTTSMAVGATYLAADAIGIDMPRDYRQNYTVFYHYKPQQRCECAGSCNKL*
TR96955|c0_g1	1.26719	2.14362	8.28269	0.0129928	0.0388302	0	0	0	0	0	0	0	0	0	0	0	ATGCCGAGAGGATGAACTTCGTACACTCGGTCATCCCACCATATTACTGATGCATGATGGTCAAACGATATAATCTCATCATCGTGGATGGTCGCTGGCTGCAGACACAACATTTCTTAAACTTTTTGGATATCTTTCTGTGATATGCAGTAGCACAAATTGTGATGTCTCAGTAAATGCTCTAAAGTTTTAAAACGTTTATAGTTTTATTTAACACTTCTTATAACGAAGTCTTGCTGCCATTGCATCCTAATTCAAACTTTTCCTCAATTAGAAATGATCAATGTATGGAAAACTGTTCTTTTTTTCTATATGAACTAAGCATCCTTATTGCCAGTACTGTGAAATGGTTGACACTGCCATACATTCAATACTAGGTTGCTCCAGAATTGCAACTTT…	0
TR84314|c0_g1	1.26669	0.629203	9.39939	0.00906085	0.0304663	CYTS_HUMAN^CYTS_HUMAN^Q:588-752,H:31-85^38.18%ID^E:6e-06^RecName: Full=Cystatin-S;^Eukaryota; Metazoa; Chordata; Craniata; Vertebrata; Euteleostomi; Mammalia; Eutheria; Euarchontoglires; Primates; Haplorrhini; Catarrhini; Hominidae; Homo	0	0	0	0	0	0	ENOG4112CFJ^Cystatin	KEGG:hsa:1472`KO:K13900	GO:0070062^cellular_component^extracellular exosome`GO:0005615^cellular_component^extracellular space`GO:0004869^molecular_function^cysteine-type endopeptidase inhibitor activity`GO:0001580^biological_process^detection of chemical stimulus involved in sensory perception of bitter taste`GO:0045861^biological_process^negative regulation of proteolysis`GO:0001895^biological_process^retina homeostasis	0	GTTACAACCTTCTTTTATGTGTGTTCCGCCACAACTTGGTGAGTAGATTTTTTATCTATCCAATTTAATTATTTTGTCATAGCACCAATAAGGAGTATAGGAACAAAAACAGGTACATCAGTAAAGATCATGCATTGACAACAACCCAGGAAGACAGAGCTTGAGCTGGTACACTGTGAAGTCACTGTTAGGTGGCTTATAGCTCTAAAGCTCAGAATTTTTTAAAGGTATTTTTCTTCCATCTTCTGCATGTGCAATCTGTGATGTGTACAGTCCTTTTCCATGAGTGTAAAAGTAAGTTTGCAATATATGCAAGTGTGTTTGTATCTCTTTATTTACTCTTACATACCAACAAACATATTTAATCAGAACAGCATCAAGTTAAGTTTTGGATATCAA…	0
TR52696|c1_g9	1.26541	7.50813	9.18716	0.0096873	0.0318379	CHI10_DROME^CHI10_DROME^Q:356-219,H:873-918^41.3%ID^E:7e-06^RecName: Full=Probable chitinase 10 {ECO:0000312|FlyBase:FBgn0250907};^Eukaryota; Metazoa; Ecdysozoa; Arthropoda; Hexapoda; Insecta; Pterygota; Neoptera; Holometabola; Diptera; Brachycera; Muscomorpha; Ephydroidea; Drosophilidae; Drosophila; Sophophora	TR52696|c1_g9|m.7170	3-374[-]	PE1_ANOGA^PE1_ANOGA^Q:9-124,H:34-119^27.59%ID^E:1e-07^RecName: Full=Peritrophin-1;^Eukaryota; Metazoa; Ecdysozoa; Arthropoda; Hexapoda; Insecta; Pterygota; Neoptera; Holometabola; Diptera; Nematocera; Culicoidea; Culicidae; Anophelinae; Anopheles`PE1_ANOGA^PE1_ANOGA^Q:8-54,H:106-153^39.58%ID^E:7e-06^RecName: Full=Peritrophin-1;^Eukaryota; Metazoa; Ecdysozoa; Arthropoda; Hexapoda; Insecta; Pterygo…	PF01607.24^CBM_14^Chitin binding Peritrophin-A domain^8-52^E:1e-14	0	0	0	KEGG:aga:AgaP_AGAP006795	GO:0005576^cellular_component^extracellular region`GO:0008061^molecular_function^chitin binding`GO:0006030^biological_process^chitin metabolic process	GO:0008061^molecular_function^chitin binding`GO:0006030^biological_process^chitin metabolic process`GO:0005576^cellular_component^extracellular region	TCACATTTGCAGAACTGACTGCAGTTTGAGGCGTGAGGAAGGTGCTTAGCAATAGAATTCTCATCTTCATTTTGTGGACATGTGCCGACAGCTGGGCAGTCTCCTGATGGAGCGGGTTTAGCTGTTGAGCTAGGTGCTGATGTTGGAGCAGCTGTAGTGGCAGCACTTGTAGGAGCAGCAGTGGAGCTAGGAGCTGAGGTTGACGCTGATCCACTTGCACAACCTGCATTTTCTGGCCAGTCACACACCTCCAGGGTAGGGTTGAAATGAAGTCCAGCAGGACAGTCGAATGTCACGGGTTTCCCATGGTCACATTTGCAGAACTGACTGCAGTTTGAGGCGTGAGGAAGGTGCTTAGCAATAGAATTCTCATC	DENSIAKHLPHASNCSQFCKCDHGKPVTFDCPAGLHFNPTLEVCDWPENAGCASGSASTSAPSSTAAPTSAATTAAPTSAPSSTAKPAPSGDCPAVGTCPQNEDENSIAKHLPHASNCSQFCKC
TR68155|c0_g3	1.26318	7.97399	30.4118	0.000101229	0.00694482	ENPL_BOVIN^ENPL_BOVIN^Q:2608-368,H:5-749^65.33%ID^E:0^RecName: Full=Endoplasmin;^Eukaryota; Metazoa; Chordata; Craniata; Vertebrata; Euteleostomi; Mammalia; Eutheria; Laurasiatheria; Cetartiodactyla; Ruminantia; Pecora; Bovidae; Bovinae; Bos	TR68155|c0_g3|m.11413	236-2617[-]	ENPL_BOVIN^ENPL_BOVIN^Q:4-750,H:5-749^66%ID^E:0^RecName: Full=Endoplasmin;^Eukaryota; Metazoa; Chordata; Craniata; Vertebrata; Euteleostomi; Mammalia; Eutheria; Laurasiatheria; Cetartiodactyla; Ruminantia; Pecora; Bovidae; Bovinae; Bos	PF02518.26^HATPase_c^Histidine kinase-, DNA gyrase B-, and HSP90-like ATPase^95-253^E:1.4e-12`PF13589.6^HATPase_c_3^Histidine kinase-, DNA gyrase B-, and HSP90-like ATPase^97-219^E:7.8e-10`PF00183.18^HSP90^Hsp90 protein^256-773^E:5.3e-222	sigP:1^20^0.898^YES	0	COG0326^Molecular chaperone. Has ATPase activity (By similarity)	KEGG:bta:282646`KO:K09487	GO:0005829^cellular_component^cytosol`GO:0005783^cellular_component^endoplasmic reticulum`GO:0034663^cellular_component^endoplasmic reticulum chaperone complex`GO:0005789^cellular_component^endoplasmic reticulum membrane`GO:0042470^cellular_component^melanosome`GO:0030496^cellular_component^midbody`GO:0048471^cellular_component^perinuclear region of cytoplasm`GO:0005886^cellular_component^plasma …	GO:0005524^molecular_function^ATP binding`GO:0051082^molecular_function^unfolded protein binding`GO:0006457^biological_process^protein folding	AATAATTAAGTCTTGTATGGACTGGCACCTACAACATAAAACACACACACACACACACACACACACACACACACACACACACACACACACACACACACACACACCTGTCTTTTCCTAGAAAGACAAATACTTTAACACATCTGCCCAATTTGCATTTTACCAGACAGATAATATTACACAAATGTCAAATTTCATCCCCACACAACACAGTCTTCACTGCCCCTTCACTATAAATTTACAACTCATCATGATCTTCACTTTCACCATCCTTGTCTTCTACTTCTTGTTCACTGTCATCTGATTTCTTTGGTTCATCATCTCCTTCCTCTACTTCATCATCCTCCTCTTCAATCTCTTCAGACTCGGGAACACCAAGTGTCTTCCTCATCATGACTTCAA…	MKYFLLCVLGVLIFSGTCYAESEDSEGTTVEADLGSSREASRTDDEVVQREEEAIKLDGLNVAQLKELREKAEKFTFQAEVNRMMKLIINSLYRNKEIFLRELISNASDALDKIRLLSLTDPNALSATSDLDIRIKADKENHILHITDTGIGMTKNDLVNNLGTIAKSGTADFLSKMQDATTSAQDLNDMIGQFGVGFYSSFLVADRVVVTTKHNDDKQYIWESDAGSFSIVEDPRGDTLKRGTQVSLHLKEEAFDFVEQDTIKNLVKKYSQFINFPIYLWTSKTIKVEEPVEPDEAEKEEKKENEVEEDDDDTEVEEEKSEEKPKTKKVDKTVWDWEILNDNKPIWTRKPADVPDDEYNEFYKSLTKDTKNPLTKIHFIAEGEVTFKSLLFVPQTQPG…
TR52079|c0_g2	1.2612	2.46391	8.85175	0.0107834	0.0339748	TRET1_DROAN^TRET1_DROAN^Q:50-214,H:794-846^40%ID^E:2e-06^RecName: Full=Facilitated trehalose transporter Tret1 {ECO:0000250|UniProtKB:A1Z8N1};^Eukaryota; Metazoa; Ecdysozoa; Arthropoda; Hexapoda; Insecta; Pterygota; Neoptera; Holometabola; Diptera; Brachycera; Muscomorpha; Ephydroidea; Drosophilidae; Drosophila; Sophophora	TR52079|c0_g2|m.6830	105-461[+]	0	0	0	0	0	0	0	0	GAAAGGTGTGGGTACGTGCCTGATGACAGTTGTTCTGGGCCTGTACGGGTTTGCCGTGGTGCGGCTCTTCCAAGTGGTGGCCGACGCACCAGAGTTGGGAGAGCATGTCGCCTTCTGGGCATTCGCTGTCTGCTGTGCACTCGGCTTTGTCTTCGTGCTACTTGTGCTCCCTGAGACCAAGGGCAAGTCCTTTCTGCAGATCCAGCAGGAGCTGCAGCGGAAAGCAAATTCCCCTGGATGAGGGCTACACAATTCTCAACTATGACTCAAGTGTGGACAAAATGAACATGAGTTGCTGTGCATTACTTGGTGAACGTGTGTGCAGACAAATGAATACGACTCATTCTGCTGAATCAGTGGAACTCTTAAAACCAGACATGTGTGTTTCCTGCAGACGAA…	MSPSGHSLSAVHSALSSCYLCSLRPRASPFCRSSRSCSGKQIPLDEGYTILNYDSSVDKMNMSCCALLGERVCRQMNTTHSAESVELLKPDMCVSCRRNCGVESSKDVQCSQLNISFF*
TR107380|c0_g1	1.26104	2.01443	16.1646	0.00146708	0.0114026	0	TR107380|c0_g1|m.1543	1-507[+]	0	0	0	0	0	0	0	0	ACCTTATTCACGACGGATCCACTCAAGGTAAATCATCAGAATCTAACCGAGGTCGATCTGTCTTCGTCGTATAAAATGATCAGAGAGTTAGACATCGTAGGCATGGCTGACGTGACACCTCTGGATGTACTCATGAGCTTACTAGCGATGCCATCGCCGATCAAGTCTCAATTGAAAGAGCCAGCAGTACAGGATTTCATCAGGAGAAACCACACCTTTGACTTGATGATCCTCGAGCGTCTGCCTTACCAAGGCTACTATGGACTGCACCACAAGGTTGGCTCGCCACCGCTCGTCGGTTTCGTGACGTTGTCTGCATACTCGCCTGTGTATTACGCCTTGGGCAACCCCATGAATCCAGCCTACATCCCTGAAATCTGGGAGGGCTTCTCTGACCAC…	TLFTTDPLKVNHQNLTEVDLSSSYKMIRELDIVGMADVTPLDVLMSLLAMPSPIKSQLKEPAVQDFIRRNHTFDLMILERLPYQGYYGLHHKVGSPPLVGFVTLSAYSPVYYALGNPMNPAYIPEIWEGFSDHMNFWQRLYNTYFALRFHYMWFYKILPQQEVIIREHF
[truncated: 231 more rows]
